# Supplementary material for: Genetic variation at IL7 provides mechanistic insights into toxicity to immune checkpoint blockade
Source: Research Square preprint supplement (doi:10.21203/rs.3.rs-1531341/v1), 2022-04-12
Supplement: Supplementary file 1 [file a820a5c5348f51c5a49fbaad.xlsx]

## Sheet: SupTable_S2
baseMean	log2FoldChange	lfcSE	stat	pvalue	padj	ENSG.gene	Gene
207.128	0.971158	0.0167887	57.8458	0	0	ENSG00000104432	IL7
4537.38	1.02668	0.038701	26.5284	4.55431e-155	3.11059e-151	ENSG00000110777	POU2AF1
1953.63	1.08416	0.041899	25.8755	1.25783e-147	5.72731e-144	ENSG00000269404	SPIB
247.571	0.990009	0.0392585	25.2177	2.56206e-140	8.74945e-137	ENSG00000164038	SLC9B2
4528.6	1.05567	0.0420831	25.0853	7.19585e-139	1.96591e-135	ENSG00000161405	IKZF3
892.146	1.07701	0.0429932	25.0507	1.71642e-138	3.90771e-135	ENSG00000182240	BACE2
9178.57	1.01842	0.0407255	25.0068	5.1515e-138	1.00528e-134	ENSG00000153064	BANK1
3091.22	0.882532	0.0355562	24.8208	5.3487e-136	9.13291e-133	ENSG00000079263	SP140
375.145	1.07907	0.0443425	24.3349	8.37512e-131	1.27116e-127	ENSG00000164236	ANKRD33B
3855.1	1.06391	0.044603	23.8529	9.45186e-126	1.29112e-122	ENSG00000132185	FCRLA
1378.66	0.97434	0.0413731	23.5501	1.25359e-122	1.55673e-119	ENSG00000095585	BLNK
2560.55	1.03597	0.0443416	23.3633	1.00981e-120	1.1495e-117	ENSG00000144645	OSBPL10
482.228	1.04532	0.0450469	23.2052	4.0347e-119	4.23953e-116	ENSG00000263961	RHEX
373.756	1.01662	0.0442061	22.9973	4.96155e-117	4.84106e-114	ENSG00000112294	ALDH5A1
759.972	0.875167	0.0380856	22.979	7.56931e-117	6.89312e-114	ENSG00000059573	ALDH18A1
397.918	0.836408	0.0370297	22.5875	5.75173e-113	4.91054e-110	ENSG00000151746	BICD1
169.094	0.774333	0.0344921	22.4496	1.29108e-111	1.03742e-108	ENSG00000119401	TRIM32
2754.09	0.72358	0.0323743	22.3505	1.19492e-110	9.06808e-108	ENSG00000152492	CCDC50
6484.62	1.00036	0.0449133	22.2731	6.74445e-110	4.83627e-107	ENSG00000116191	RALGPS2
750.85	1.02824	0.0461696	22.2709	7.08092e-110	4.83627e-107	ENSG00000109762	SNX25
1301.88	1.10364	0.0496255	22.2394	1.42948e-109	9.29845e-107	ENSG00000240505	TNFRSF13B
766.015	0.596565	0.026946	22.1393	1.32419e-108	8.222e-106	ENSG00000151835	SACS
1855.16	0.454563	0.0205972	22.0692	6.24641e-108	3.70983e-105	ENSG00000086102	NFX1
411.944	0.74739	0.0338699	22.0665	6.63156e-108	3.77446e-105	ENSG00000088808	PPP1R13B
172.286	1.04238	0.0474899	21.9496	8.73571e-107	4.77319e-104	ENSG00000229417	NPM1P25
2083.41	1.0616	0.048424	21.9231	1.56483e-106	8.22136e-104	ENSG00000107438	PDLIM1
410.622	1.04962	0.0480403	21.8488	7.97756e-106	4.03606e-103	ENSG00000188848	BEND4
1507.49	1.04609	0.0479808	21.8022	2.21214e-105	1.07921e-102	ENSG00000272398	CD24
5611.34	0.821481	0.037706	21.7865	3.11687e-105	1.46815e-102	ENSG00000133789	SWAP70
4907.55	1.00475	0.0464189	21.6452	6.73892e-104	3.06845e-101	ENSG00000198286	CARD11
9037.55	0.59519	0.0275806	21.58	2.76721e-103	1.21936e-100	ENSG00000103365	GGA2
1113.33	0.950089	0.0440682	21.5595	4.31206e-103	1.84071e-100	ENSG00000013016	EHD3
2532.31	0.920162	0.0427252	21.5368	7.0436e-103	2.91562e-100	ENSG00000196628	TCF4
1437.23	1.02786	0.0477531	21.5245	9.18031e-103	3.68832e-100	ENSG00000082438	COBLL1
452.917	0.839227	0.0390193	21.508	1.31066e-102	5.11533e-100	ENSG00000170113	NIPA1
6522.1	0.690497	0.0321811	21.4566	3.96054e-102	1.5028e-99	ENSG00000143799	PARP1
1338.17	1.05131	0.0490345	21.4403	5.62322e-102	2.07603e-99	ENSG00000170456	DENND5B
4206.09	1.07595	0.0506254	21.2531	3.08692e-100	1.10967e-97	ENSG00000124772	CPNE5
2639.2	0.551081	0.0259966	21.1982	9.92702e-100	3.477e-97	ENSG00000112159	MDN1
1421.62	0.914639	0.0431819	21.1811	1.42772e-99	4.87568e-97	ENSG00000188822	CNR2
1998.31	0.817994	0.0386451	21.1669	1.93028e-99	6.43112e-97	ENSG00000119866	BCL11A
109.715	0.857481	0.0405947	21.123	4.89279e-99	1.59132e-96	ENSG00000141040	ZNF287
381.973	0.924387	0.0439012	21.056	2.01298e-98	6.39472e-96	ENSG00000133740	E2F5
227.541	0.980334	0.0466172	21.0294	3.5283e-98	1.09538e-95	ENSG00000188522	FAM83G
895.813	0.51693	0.0246052	21.009	5.43178e-98	1.64885e-95	ENSG00000067369	TP53BP1
2674.25	0.995327	0.0474652	20.9696	1.24215e-97	3.68863e-95	ENSG00000099204	ABLIM1
1301.86	0.751219	0.0358572	20.9503	1.86464e-97	5.41935e-95	ENSG00000130348	QRSL1
279.839	0.7672	0.0369468	20.765	8.97831e-96	2.55508e-93	ENSG00000154328	NEIL2
6380.37	0.735887	0.0354703	20.7466	1.31692e-95	3.67125e-93	ENSG00000073849	ST6GAL1
1364.38	1.07626	0.0518979	20.738	1.57484e-95	4.30247e-93	ENSG00000117322	CR2
553.711	0.860848	0.041775	20.6068	2.38533e-94	6.38894e-92	ENSG00000083720	OXCT1
1033.8	-0.610304	0.0296411	-20.5897	3.3915e-94	8.9092e-92	ENSG00000089060	SLC8B1
444.634	0.762448	0.0371056	20.5481	8.01137e-94	2.06482e-91	ENSG00000105866	SP4
419.239	1.07286	0.0522459	20.5347	1.0541e-93	2.66648e-91	ENSG00000135736	CCDC102A
7306.74	1.02689	0.0501317	20.4838	3.00416e-93	7.46125e-91	ENSG00000091490	SEL1L3
422.836	0.915109	0.0447126	20.4665	4.28414e-93	1.04502e-90	ENSG00000197385	ZNF860
1923.4	0.709538	0.0346755	20.4622	4.67615e-93	1.12064e-90	ENSG00000163029	SMC6
12717.6	0.965171	0.0472115	20.4436	6.85273e-93	1.61394e-90	ENSG00000007312	CD79B
371.084	1.08995	0.0533934	20.4135	1.26932e-92	2.9388e-90	ENSG00000125648	SLC25A23
1868.57	0.602583	0.0295365	20.4013	1.62882e-92	3.70829e-90	ENSG00000100307	CBX7
262.71	0.942276	0.0463804	20.3163	9.23639e-92	2.06835e-89	ENSG00000138134	STAMBPL1
5559.82	0.585073	0.0288375	20.2886	1.62119e-91	3.57185e-89	ENSG00000125354	SEPTIN6
234.367	0.741794	0.0365969	20.2693	2.39851e-91	5.20058e-89	ENSG00000076248	UNG
733.55	0.983309	0.0486541	20.2102	7.96561e-91	1.70016e-88	ENSG00000168813	ZNF507
6382.05	0.431262	0.021342	20.2072	8.4621e-91	1.77834e-88	ENSG00000197943	PLCG2
2236.47	-0.659501	0.0326806	-20.1802	1.46082e-90	3.02345e-88	ENSG00000068323	TFE3
1717.12	0.965298	0.0479316	20.1391	3.3545e-90	6.83917e-88	ENSG00000162739	SLAMF6
65.1303	1.05858	0.0526302	20.1135	5.61584e-90	1.12812e-87	ENSG00000096092	TMEM14A
892.569	-1.02943	0.05119	-20.11	6.03438e-90	1.19463e-87	ENSG00000172375	C2CD2L
159.198	0.81181	0.0403826	20.103	6.95051e-90	1.35634e-87	ENSG00000139737	SLAIN1
182.357	0.728403	0.0362469	20.0956	8.0634e-90	1.55135e-87	ENSG00000184867	ARMCX2
2359.32	0.709392	0.0353118	20.0894	9.13792e-90	1.73367e-87	ENSG00000085117	CD82
8176.17	0.721597	0.0359603	20.0665	1.44794e-89	2.70944e-87	ENSG00000055163	CYFIP2
1942.32	1.0924	0.0544757	20.0529	1.90487e-89	3.51628e-87	ENSG00000171992	SYNPO
1230.44	1.02644	0.0512312	20.0354	2.70725e-89	4.9308e-87	ENSG00000162892	IL24
522.17	0.591463	0.0296408	19.9544	1.37394e-88	2.46948e-86	ENSG00000181191	PJA1
293.321	1.04586	0.0524207	19.9512	1.46238e-88	2.5943e-86	ENSG00000110660	SLC35F2
10830.6	0.937365	0.0470079	19.9406	1.80884e-88	3.16779e-86	ENSG00000227507	LTB
723.863	-1.1266	0.0566482	-19.8877	5.19738e-88	8.98686e-86	ENSG00000144040	SFXN5
12942.7	0.619288	0.0311757	19.8644	8.26682e-88	1.41156e-85	ENSG00000128815	WDFY4
1281.84	1.01889	0.0514724	19.7948	3.29933e-87	5.56406e-85	ENSG00000101096	NFATC2
229.246	1.08698	0.0549294	19.7886	3.73303e-87	6.21868e-85	ENSG00000171033	PKIA
4184.95	-0.523608	0.0264924	-19.7644	6.02831e-87	9.92129e-85	ENSG00000141506	PIK3R5
408.804	0.662879	0.0337453	19.6436	6.56329e-86	1.06732e-83	ENSG00000146281	PM20D2
973.611	-1.09834	0.0559629	-19.6262	9.2435e-86	1.48548e-83	ENSG00000168476	REEP4
11182.6	0.949172	0.048418	19.6037	1.43772e-85	2.28363e-83	ENSG00000162894	FCMR
1017.4	0.889102	0.0454582	19.5586	3.48199e-85	5.46712e-83	ENSG00000058091	CDK14
348.662	1.0753	0.0552186	19.4735	1.84304e-84	2.8609e-82	ENSG00000151612	ZNF827
110.072	1.03782	0.053296	19.4728	1.86773e-84	2.86666e-82	ENSG00000116771	AGMAT
1400.13	0.687725	0.0353269	19.4675	2.07241e-84	3.14546e-82	ENSG00000047346	FAM214A
3187.82	1.04564	0.0538268	19.4259	4.65849e-84	6.99285e-82	ENSG00000171791	BCL2
1756.24	-1.12826	0.0582566	-19.3671	1.46181e-83	2.17047e-81	ENSG00000198585	NUDT16
4371.19	-0.525599	0.0271829	-19.3356	2.69453e-83	3.95777e-81	ENSG00000159842	ABR
1475.92	-0.881372	0.0456575	-19.304	4.97265e-83	7.22621e-81	ENSG00000148158	SNX30
228.942	0.859731	0.0445689	19.29	6.52318e-83	9.37964e-81	ENSG00000147912	FBXO10
1634.09	1.01605	0.0526767	19.2883	6.72906e-83	9.57489e-81	ENSG00000174123	TLR10
2201.07	-0.773997	0.0401653	-19.2703	9.53916e-83	1.34335e-80	ENSG00000104915	STX10
2028.58	0.691659	0.0359192	19.256	1.25785e-82	1.75329e-80	ENSG00000101017	CD40
411.99	0.78856	0.0410109	19.2281	2.15486e-82	2.97327e-80	ENSG00000141384	TAF4B
536.718	0.939854	0.0489224	19.2111	2.98689e-82	4.08009e-80	ENSG00000121895	TMEM156
5162.72	-0.846958	0.0441153	-19.1987	3.79313e-82	5.13011e-80	ENSG00000198909	MAP3K3
9166.7	-0.463789	0.0241622	-19.1948	4.09149e-82	5.47938e-80	ENSG00000184922	FMNL1
308.051	0.624237	0.0325329	19.1879	4.67483e-82	6.19983e-80	ENSG00000155016	CYP2U1
4855.16	0.977828	0.0509761	19.1821	5.22173e-82	6.85854e-80	ENSG00000101445	PPP1R16B
1582.7	-0.796019	0.0415086	-19.1772	5.73902e-82	7.46619e-80	ENSG00000157600	TMEM164
415.602	0.841568	0.0438924	19.1734	6.17372e-82	7.95595e-80	ENSG00000079435	LIPE
697.004	0.961187	0.0501433	19.1688	6.74359e-82	8.60911e-80	ENSG00000073111	MCM2
2947.9	0.460936	0.0240569	19.1602	7.95402e-82	1.00604e-79	ENSG00000275066	SYNRG
2867.03	-0.816516	0.0426348	-19.1514	9.42335e-82	1.18094e-79	ENSG00000134698	AGO4
241.246	0.595284	0.0310845	19.1505	9.57914e-82	1.18956e-79	ENSG00000158691	ZSCAN12
1269.48	-0.978245	0.0510908	-19.1472	1.02158e-81	1.25718e-79	ENSG00000167202	TBC1D2B
81.4651	1.00395	0.0524851	19.1283	1.46696e-81	1.78917e-79	ENSG00000165521	EML5
496.375	1.11441	0.0583278	19.106	2.25245e-81	2.72287e-79	ENSG00000204475	NCR3
4368.05	0.414535	0.0217148	19.09	3.05801e-81	3.66425e-79	ENSG00000118058	KMT2A
718.832	0.534618	0.0280289	19.0738	4.1684e-81	4.95134e-79	ENSG00000001461	NIPAL3
149.197	0.814121	0.0427026	19.0649	4.94462e-81	5.82272e-79	ENSG00000181007	ZFP82
127.685	1.08593	0.0571823	18.9907	2.03498e-80	2.37588e-78	ENSG00000147642	SYBU
3434.4	0.344663	0.0181502	18.9895	2.08444e-80	2.413e-78	ENSG00000115020	PIKFYVE
12245.4	1.01334	0.0533954	18.978	2.5913e-80	2.97455e-78	ENSG00000134954	ETS1
1316.99	-0.4632	0.0244474	-18.9468	4.69316e-80	5.34238e-78	ENSG00000067829	IDH3G
1671.37	0.919943	0.048678	18.8985	1.17254e-79	1.32371e-77	ENSG00000178764	ZHX2
1316.95	0.741397	0.0393057	18.8623	2.3278e-79	2.60638e-77	ENSG00000139266	MARCHF9
506.645	0.716431	0.0379885	18.8591	2.47212e-79	2.74546e-77	ENSG00000133065	SLC41A1
722.754	0.995457	0.052795	18.8551	2.66655e-79	2.93751e-77	ENSG00000081052	COL4A4
3252.89	0.838682	0.0445008	18.8464	3.14354e-79	3.43526e-77	ENSG00000136717	BIN1
959.224	-0.698425	0.0370607	-18.8455	3.20172e-79	3.47107e-77	ENSG00000110442	COMMD9
156.17	0.889451	0.0472356	18.8301	4.27982e-79	4.60333e-77	ENSG00000181690	PLAG1
382.531	0.852356	0.0452768	18.8254	4.67325e-79	4.98723e-77	ENSG00000165138	ANKS6
1732.91	-0.928469	0.0493411	-18.8173	5.4444e-79	5.76516e-77	ENSG00000169826	CSGALNACT2
2635.54	0.944685	0.050222	18.8102	6.23359e-79	6.55007e-77	ENSG00000171316	CHD7
2570.87	0.646263	0.0343787	18.7984	7.78924e-79	8.12222e-77	ENSG00000254838	GVINP1
2774.42	-0.718642	0.0382552	-18.7855	9.9313e-79	1.02774e-76	ENSG00000071553	ATP6AP1
165.603	1.01115	0.0538998	18.7598	1.61008e-78	1.65366e-76	ENSG00000185760	KCNQ5
5667.15	0.971993	0.0518319	18.7528	1.83696e-78	1.8726e-76	ENSG00000111371	SLC38A1
103.234	1.08433	0.0578398	18.7471	2.04426e-78	2.06849e-76	ENSG00000164114	MAP9
463.895	-0.696088	0.0372799	-18.6719	8.37575e-78	8.4127e-76	ENSG00000125149	PHAF1
847.006	-0.635524	0.0340659	-18.6557	1.13451e-77	1.13119e-75	ENSG00000123130	ACOT9
2410.23	-0.583923	0.0313042	-18.6532	1.18979e-77	1.17772e-75	ENSG00000090372	STRN4
1227.19	0.56302	0.0301855	18.652	1.21673e-77	1.19572e-75	ENSG00000048028	USP28
4890.82	0.766195	0.0410799	18.6513	1.23139e-77	1.20148e-75	ENSG00000171604	CXXC5
709.815	0.619593	0.0332388	18.6407	1.50349e-77	1.45657e-75	ENSG00000164323	CFAP97
1097.27	0.933479	0.0501756	18.6043	2.96758e-77	2.85473e-75	ENSG00000072858	SIDT1
2069.63	1.1171	0.0600643	18.5984	3.31147e-77	3.16326e-75	ENSG00000168421	RHOH
1195.1	-0.805031	0.0432946	-18.5943	3.57648e-77	3.39145e-75	ENSG00000135723	FHOD1
1828.68	0.415737	0.0223588	18.5939	3.6e-77	3.39145e-75	ENSG00000023516	AKAP11
860.022	-0.648806	0.0348972	-18.592	3.73304e-77	3.49269e-75	ENSG00000184470	TXNRD2
1749.63	1.06667	0.0574247	18.5751	5.11552e-77	4.7536e-75	ENSG00000120278	PLEKHG1
5433.11	0.684571	0.0368576	18.5734	5.27789e-77	4.87135e-75	ENSG00000043143	JADE2
871.875	-0.576201	0.0310351	-18.5661	6.04009e-77	5.53742e-75	ENSG00000079277	MKNK1
134.396	1.13843	0.061366	18.5515	7.93085e-77	7.22236e-75	ENSG00000116661	FBXO2
19662.5	0.732033	0.0394682	18.5474	8.56059e-77	7.74422e-75	ENSG00000074370	ATP2A3
5395.53	0.884669	0.0477156	18.5404	9.74059e-77	8.75371e-75	ENSG00000115306	SPTBN1
227.13	0.70387	0.037987	18.5292	1.19959e-76	1.07101e-74	ENSG00000198453	ZNF568
200.925	0.836465	0.0451705	18.518	1.47958e-76	1.305e-74	ENSG00000116157	GPX7
359.811	1.15579	0.0624145	18.5179	1.48078e-76	1.305e-74	ENSG00000139193	CD27
2040.8	0.767972	0.0414803	18.5141	1.58799e-76	1.39051e-74	ENSG00000163644	PPM1K
522.582	-1.54663	0.0835496	-18.5115	1.66668e-76	1.45012e-74	ENSG00000214063	TSPAN4
1666.08	-0.724584	0.0391841	-18.4918	2.40491e-76	2.07918e-74	ENSG00000138434	ITPRID2
483.865	0.919588	0.049754	18.4827	2.84481e-76	2.44403e-74	ENSG00000184574	LPAR5
383.015	1.00986	0.0546434	18.4809	2.94325e-76	2.5128e-74	ENSG00000122188	LAX1
136.382	0.917873	0.0497146	18.4628	4.11137e-76	3.48828e-74	ENSG00000115526	CHST10
624.404	0.667508	0.0361605	18.4596	4.36629e-76	3.6817e-74	ENSG00000148154	UGCG
743.345	-0.642594	0.0348303	-18.4493	5.28306e-76	4.4274e-74	ENSG00000160219	GAB3
130.011	0.735696	0.0398875	18.4443	5.7952e-76	4.82698e-74	ENSG00000197429	IPP
1613.35	1.02278	0.0554959	18.4298	7.57757e-76	6.24793e-74	ENSG00000168734	PKIG
3429.58	-0.95234	0.0516743	-18.4297	7.59266e-76	6.24793e-74	ENSG00000076944	STXBP2
2591.03	0.544579	0.0295641	18.4203	9.02923e-76	7.38558e-74	ENSG00000104814	MAP4K1
1566.29	0.882109	0.0479145	18.4101	1.09083e-75	8.86953e-74	ENSG00000008853	RHOBTB2
2991.49	0.958336	0.0520751	18.403	1.24378e-75	1.00532e-73	ENSG00000243156	MICAL3
941.544	-0.852134	0.0463311	-18.3923	1.51503e-75	1.21737e-73	ENSG00000107819	SFXN3
48.3923	0.948705	0.0516434	18.3703	2.27098e-75	1.81413e-73	ENSG00000275004	ZNF280B
1262.68	-0.866463	0.0471809	-18.3647	2.51795e-75	1.99972e-73	ENSG00000162341	TPCN2
653.271	1.01218	0.0551342	18.3585	2.82253e-75	2.22866e-73	ENSG00000137078	SIT1
1271.89	0.967927	0.0527432	18.3517	3.19977e-75	2.51201e-73	ENSG00000122224	LY9
270.457	-0.920265	0.0501773	-18.3403	3.94757e-75	3.08136e-73	ENSG00000141337	ARSG
3633.14	-0.491969	0.0268474	-18.3246	5.26577e-75	4.08696e-73	ENSG00000197448	GSTK1
1010.34	1.04508	0.0570747	18.3107	6.80246e-75	5.24981e-73	ENSG00000078589	P2RY10
5361.9	-0.651128	0.0355612	-18.3101	6.88e-75	5.27982e-73	ENSG00000110934	BIN2
7133.34	0.535502	0.0292583	18.3026	7.89323e-75	6.02355e-73	ENSG00000197694	SPTAN1
1405.35	-0.944481	0.0516264	-18.2945	9.14752e-75	6.94195e-73	ENSG00000119522	DENND1A
2323.93	0.942532	0.0515379	18.2881	1.02855e-74	7.76241e-73	ENSG00000165209	STRBP
158.284	0.939125	0.0513654	18.2832	1.12579e-74	8.44958e-73	ENSG00000081377	CDC14B
195.886	0.936437	0.0512638	18.267	1.51514e-74	1.13097e-72	ENSG00000204186	ZDBF2
302.062	0.824294	0.045144	18.2592	1.74807e-74	1.29775e-72	ENSG00000184293	CLECL1
1234.94	-0.938022	0.0514476	-18.2326	2.84668e-74	2.10193e-72	ENSG00000049245	VAMP3
1579.98	-1.00896	0.0553502	-18.2287	3.05327e-74	2.24235e-72	ENSG00000101493	ZNF516
906.6	-0.651785	0.0357747	-18.2192	3.63697e-74	2.65674e-72	ENSG00000141504	SAT2
45.0226	0.929401	0.0510466	18.2069	4.54983e-74	3.30589e-72	ENSG00000152413	HOMER1
948.637	-0.590732	0.0324746	-18.1906	6.12524e-74	4.42703e-72	ENSG00000124067	SLC12A4
885.528	0.805071	0.0442725	18.1845	6.85237e-74	4.9265e-72	ENSG00000173511	VEGFB
3888.28	-0.912841	0.0502498	-18.1661	9.57893e-74	6.85069e-72	ENSG00000068650	ATP11A
1428.86	-0.964265	0.0530903	-18.1627	1.01826e-73	7.24451e-72	ENSG00000174695	TMEM167A
4460.06	0.337774	0.0186043	18.1557	1.15776e-73	8.19431e-72	ENSG00000166783	MARF1
3498.75	0.646755	0.0356237	18.1552	1.16864e-73	8.22866e-72	ENSG00000147168	IL2RG
2644.99	-0.632206	0.0348268	-18.1529	1.21844e-73	8.53532e-72	ENSG00000101150	TPD52L2
12290.5	-0.772477	0.0425901	-18.1375	1.61302e-73	1.12418e-71	ENSG00000173442	EHBP1L1
1114.7	0.930572	0.0513336	18.1279	1.91887e-73	1.33054e-71	ENSG00000124243	BCAS4
5927.69	-0.571523	0.0315389	-18.1212	2.1684e-73	1.49598e-71	ENSG00000135506	OS9
17088.1	0.888762	0.0490783	18.1091	2.70275e-73	1.85526e-71	ENSG00000105369	CD79A
3079.68	-1.04325	0.0576247	-18.1043	2.94827e-73	2.01184e-71	ENSG00000162302	RPS6KA4
1883.49	0.837905	0.0462827	18.1041	2.96032e-73	2.01184e-71	ENSG00000164543	STK17A
2275.99	-0.730317	0.0403468	-18.101	3.13092e-73	2.11725e-71	ENSG00000013810	TACC3
571.672	-1.04603	0.0577923	-18.0999	3.19373e-73	2.14908e-71	ENSG00000164300	SERINC5
204.155	0.652819	0.0360828	18.0923	3.66769e-73	2.45591e-71	ENSG00000067606	PRKCZ
4634.91	-1.01596	0.0561575	-18.0912	3.73718e-73	2.49024e-71	ENSG00000167703	SLC43A2
4030.84	-0.794868	0.0439495	-18.086	4.112e-73	2.7267e-71	ENSG00000113648	MACROH2A1
1616	0.403629	0.0223249	18.0798	4.60049e-73	3.03588e-71	ENSG00000136861	CDK5RAP2
3345.71	-0.666014	0.0368953	-18.0515	7.68377e-73	5.04617e-71	ENSG00000133961	NUMB
935.453	-1.13189	0.0627367	-18.0419	9.13158e-73	5.9683e-71	ENSG00000197548	ATG7
2681.14	-0.336045	0.0186301	-18.0377	9.85124e-73	6.408e-71	ENSG00000114316	USP4
431.85	0.691064	0.0383145	18.0366	1.00504e-72	6.50658e-71	ENSG00000138182	KIF20B
6141.48	-0.679411	0.0376709	-18.0354	1.02657e-72	6.61459e-71	ENSG00000069424	KCNAB2
3015.69	-0.982698	0.0544903	-18.0344	1.04659e-72	6.71193e-71	ENSG00000158717	RNF166
1251.52	-0.536899	0.02979	-18.0228	1.28992e-72	8.23377e-71	ENSG00000148719	DNAJB12
511.652	-1.06009	0.0588421	-18.0159	1.46291e-72	9.2946e-71	ENSG00000078124	ACER3
1197.38	0.466175	0.0258806	18.0125	1.55439e-72	9.83006e-71	ENSG00000198873	GRK5
2911.65	-0.925175	0.0513648	-18.0118	1.57296e-72	9.90167e-71	ENSG00000183255	PTTG1IP
1159.35	0.729097	0.0404866	18.0083	1.67593e-72	1.05014e-70	ENSG00000120910	PPP3CC
269.585	0.558257	0.031006	18.0048	1.78618e-72	1.11412e-70	ENSG00000221829	FANCG
226.797	0.798283	0.0443732	17.9902	2.32423e-72	1.44314e-70	ENSG00000154016	GRAP
362.742	1.01609	0.0565793	17.9587	4.09958e-72	2.53395e-70	ENSG00000145247	OCIAD2
1538.53	-0.866492	0.0482856	-17.9451	5.23763e-72	3.22279e-70	ENSG00000241878	PISD
3063.55	-0.444129	0.0247529	-17.9426	5.48749e-72	3.36139e-70	ENSG00000142208	AKT1
640.939	-1.5914	0.0887206	-17.9372	6.04019e-72	3.68344e-70	ENSG00000170190	SLC16A5
100.056	0.847854	0.0472859	17.9304	6.83026e-72	4.14673e-70	ENSG00000133131	MORC4
496.16	0.645221	0.0359873	17.9292	6.98319e-72	4.22081e-70	ENSG00000019485	PRDM11
1507.91	0.419937	0.0234337	17.9202	8.19635e-72	4.93225e-70	ENSG00000063601	MTMR1
724.912	0.768033	0.0428687	17.9159	8.85553e-72	5.30555e-70	ENSG00000177732	SOX12
414.871	0.550992	0.0307556	17.9151	8.98287e-72	5.35834e-70	ENSG00000117174	ZNHIT6
138.229	0.970378	0.0542098	17.9004	1.17041e-71	6.95121e-70	ENSG00000134709	HOOK1
2612.18	0.641604	0.0358638	17.89	1.41071e-71	8.34215e-70	ENSG00000257093	DENND11
1851.7	-1.0961	0.0612807	-17.8865	1.50143e-71	8.84029e-70	ENSG00000100284	TOM1
1691.44	-0.79906	0.0446975	-17.8771	1.77995e-71	1.04353e-69	ENSG00000181523	SGSH
446.192	0.618217	0.0345845	17.8755	1.8287e-71	1.06752e-69	ENSG00000198131	ZNF544
7828.47	-1.1816	0.0661683	-17.8574	2.53096e-71	1.47119e-69	ENSG00000141480	ARRB2
1045.82	-0.805044	0.0451004	-17.85	2.8887e-71	1.67202e-69	ENSG00000168256	NKIRAS2
2126.69	-0.708732	0.0397162	-17.8449	3.16619e-71	1.8249e-69	ENSG00000160209	PDXK
7554.37	-0.552862	0.0309976	-17.8356	3.73797e-71	2.1454e-69	ENSG00000177731	FLII
201.486	0.838001	0.0469928	17.8325	3.95013e-71	2.25769e-69	ENSG00000135622	SEMA4F
974.644	-1.08825	0.061038	-17.829	4.20886e-71	2.39554e-69	ENSG00000165233	CARD19
2867.21	-0.540887	0.0303391	-17.8281	4.27837e-71	2.425e-69	ENSG00000162736	NCSTN
775.409	-0.628459	0.0352695	-17.8188	5.0516e-71	2.85144e-69	ENSG00000213523	SRA1
312.65	0.965067	0.0541865	17.8101	5.89995e-71	3.3166e-69	ENSG00000168081	PNOC
187.354	0.669946	0.0376175	17.8094	5.9738e-71	3.34435e-69	ENSG00000088543	C3orf18
823.441	-1.25517	0.0704939	-17.8054	6.41915e-71	3.579e-69	ENSG00000131069	ACSS2
554.801	-0.980148	0.0550646	-17.8	7.07295e-71	3.9275e-69	ENSG00000109113	RAB34
2586.14	-0.725072	0.0407596	-17.789	8.59802e-71	4.75502e-69	ENSG00000100106	TRIOBP
479.675	1.0145	0.0570327	17.788	8.757e-71	4.82341e-69	ENSG00000124225	PMEPA1
4377.4	-0.755188	0.0424808	-17.7772	1.06238e-70	5.82813e-69	ENSG00000121064	SCPEP1
1538.15	-0.772165	0.0434889	-17.7555	1.56337e-70	8.54224e-69	ENSG00000141068	KSR1
141.48	0.858284	0.0483499	17.7515	1.67781e-70	9.13104e-69	ENSG00000147138	GPR174
144.553	0.538567	0.0303434	17.7491	1.75271e-70	9.50078e-69	ENSG00000133641	C12orf29
1998.56	-0.485859	0.0273821	-17.7437	1.92878e-70	1.04139e-68	ENSG00000169919	GUSB
3494.11	-0.810025	0.0456595	-17.7406	2.0387e-70	1.0964e-68	ENSG00000131389	SLC6A6
1619.52	0.598593	0.0337648	17.7283	2.53428e-70	1.35758e-68	ENSG00000198589	LRBA
167.611	0.758405	0.042809	17.716	3.15391e-70	1.68291e-68	ENSG00000256771	ZNF253
2211.26	-0.709483	0.0401062	-17.6901	4.99507e-70	2.65497e-68	ENSG00000010295	IFFO1
2690.62	0.465216	0.0263059	17.6848	5.48841e-70	2.90588e-68	ENSG00000128731	HERC2
234.167	0.825519	0.0466971	17.6782	6.17618e-70	3.2574e-68	ENSG00000135414	GDF11
4223.2	-0.781221	0.0441988	-17.6752	6.51462e-70	3.42268e-68	ENSG00000116871	MAP7D1
2621.58	-0.970309	0.054935	-17.6629	8.10232e-70	4.24052e-68	ENSG00000072062	PRKACA
3347.31	-0.795691	0.0450547	-17.6606	8.4413e-70	4.40108e-68	ENSG00000135655	USP15
107.653	0.64208	0.0363747	17.6518	9.84944e-70	5.11572e-68	ENSG00000197050	ZNF420
2036.46	-0.725426	0.0411065	-17.6475	1.06411e-69	5.50598e-68	ENSG00000180304	OAZ2
2527.04	-1.299	0.073648	-17.6379	1.26046e-69	6.49729e-68	ENSG00000143537	ADAM15
1964.57	-0.730964	0.0414449	-17.637	1.28063e-69	6.57648e-68	ENSG00000120889	TNFRSF10B
299.983	0.618515	0.0350962	17.6234	1.62873e-69	8.33276e-68	ENSG00000121406	ZNF549
1063.84	0.773072	0.0438751	17.6198	1.73524e-69	8.84454e-68	ENSG00000118922	KLF12
564.106	-1.04751	0.0595335	-17.5953	2.67653e-69	1.35916e-67	ENSG00000123643	SLC36A1
3861.01	-0.899264	0.0511419	-17.5837	3.28396e-69	1.66144e-67	ENSG00000106348	IMPDH1
1540.77	-0.657275	0.0374191	-17.5652	4.54892e-69	2.29292e-67	ENSG00000153250	RBMS1
300.119	0.912036	0.0519293	17.563	4.72718e-69	2.37402e-67	ENSG00000237440	ZNF737
3027.77	0.921335	0.0524616	17.5621	4.80666e-69	2.40509e-67	ENSG00000102445	RUBCNL
262.157	-1.12581	0.0641254	-17.5563	5.31911e-69	2.65179e-67	ENSG00000167995	BEST1
689.139	-1.09178	0.0622178	-17.5477	6.19743e-69	3.07843e-67	ENSG00000101236	RNF24
1668.63	0.852853	0.0486064	17.5461	6.36834e-69	3.15187e-67	ENSG00000180096	SEPTIN1
2407.65	0.704408	0.0401563	17.5416	6.89192e-69	3.39869e-67	ENSG00000205268	PDE7A
243.478	0.716357	0.0408806	17.5232	9.53777e-69	4.68654e-67	ENSG00000197299	BLM
3194.66	-0.830366	0.0473899	-17.522	9.73322e-69	4.76544e-67	ENSG00000119321	FKBP15
1163.31	0.96169	0.0548919	17.5197	1.01359e-68	4.94488e-67	ENSG00000152689	RASGRP3
3475.33	-0.961174	0.0548711	-17.5169	1.06397e-68	5.17217e-67	ENSG00000100034	PPM1F
784.4	0.697219	0.0398071	17.5149	1.10187e-68	5.33743e-67	ENSG00000179222	MAGED1
411.103	-1.04639	0.0597561	-17.511	1.18172e-68	5.704e-67	ENSG00000167987	VPS37C
506.873	-1.50708	0.0860928	-17.5053	1.30486e-68	6.2762e-67	ENSG00000117480	FAAH
738.17	-1.03759	0.0592957	-17.4986	1.46756e-68	7.03399e-67	ENSG00000166900	STX3
1675.49	-1.88953	0.108038	-17.4895	1.72321e-68	8.23044e-67	ENSG00000177989	ODF3B
196.597	1.13153	0.0647844	17.4661	2.59487e-68	1.23505e-66	ENSG00000134460	IL2RA
1669.04	-1.08243	0.061977	-17.465	2.64699e-68	1.25548e-66	ENSG00000064601	CTSA
2370.15	-0.353521	0.0202454	-17.4618	2.80017e-68	1.32354e-66	ENSG00000180104	EXOC3
124.514	0.78255	0.0448452	17.45	3.44022e-68	1.62046e-66	ENSG00000104635	SLC39A14
604.482	-1.04252	0.0597723	-17.4416	3.98988e-68	1.87291e-66	ENSG00000135503	ACVR1B
2332.62	-0.764503	0.0438377	-17.4394	4.14465e-68	1.9389e-66	ENSG00000101294	HM13
4688.75	-0.771832	0.0442712	-17.4342	4.54189e-68	2.11748e-66	ENSG00000149091	DGKZ
507.26	-0.7863	0.0451221	-17.4261	5.2319e-68	2.43088e-66	ENSG00000088854	DNAAF9
4783.41	-0.897356	0.0515007	-17.4241	5.41121e-68	2.50566e-66	ENSG00000163932	PRKCD
3190.38	0.865155	0.0496679	17.4188	5.9399e-68	2.74118e-66	ENSG00000176533	GNG7
3958.3	-1.0864	0.0623897	-17.4132	6.55153e-68	3.01326e-66	ENSG00000170275	CRTAP
780.424	-1.03844	0.059675	-17.4015	8.03264e-68	3.68208e-66	ENSG00000104447	TRPS1
66.9749	0.884198	0.0508168	17.3997	8.29061e-68	3.78762e-66	ENSG00000168661	ZNF30
1418.31	-0.970427	0.0557961	-17.3924	9.42285e-68	4.29054e-66	ENSG00000140548	ZNF710
2072.14	0.893417	0.0513705	17.3916	9.55018e-68	4.33407e-66	ENSG00000167106	FAM102A
14091.9	1.01035	0.0580957	17.3911	9.63342e-68	4.35737e-66	ENSG00000196092	PAX5
1592.92	0.886399	0.0509872	17.3848	1.07653e-67	4.85327e-66	ENSG00000152217	SETBP1
383.808	-1.47233	0.0846937	-17.3842	1.08755e-67	4.88683e-66	ENSG00000151062	CACNA2D4
1913.92	0.420908	0.0242277	17.373	1.32218e-67	5.92162e-66	ENSG00000102054	RBBP7
163.874	0.691493	0.0398428	17.3555	1.79097e-67	7.9724e-66	ENSG00000197008	ZNF138
441.941	0.893129	0.0514608	17.3555	1.79175e-67	7.9724e-66	ENSG00000179715	PCED1B
191.191	0.784291	0.0452124	17.3468	2.08422e-67	9.24363e-66	ENSG00000255310	NA
215.341	-0.975467	0.0562394	-17.3449	2.15459e-67	9.52483e-66	ENSG00000138604	GLCE
881.478	0.427879	0.0246731	17.342	2.26906e-67	9.99852e-66	ENSG00000066933	MYO9A
2004.49	-0.796309	0.0459196	-17.3414	2.29208e-67	1.00675e-65	ENSG00000139278	GLIPR1
1807.97	0.539159	0.0310965	17.3382	2.42114e-67	1.06003e-65	ENSG00000100580	TMED8
5235.36	-0.722851	0.0417085	-17.331	2.74379e-67	1.19745e-65	ENSG00000104774	MAN2B1
294.13	0.584907	0.0337507	17.3302	2.78338e-67	1.21086e-65	ENSG00000245937	SLC12A2-DT
139.351	0.83925	0.0484542	17.3205	3.29707e-67	1.42978e-65	ENSG00000155961	RAB39B
773.434	-1.06917	0.0617332	-17.3191	3.37382e-67	1.45843e-65	ENSG00000213625	LEPROT
2736.4	-0.87786	0.0506936	-17.317	3.50226e-67	1.50918e-65	ENSG00000187605	TET3
958.317	-0.883906	0.0510599	-17.3112	3.87503e-67	1.66456e-65	ENSG00000102032	RENBP
6151.44	-0.821545	0.0474604	-17.3101	3.94627e-67	1.68985e-65	ENSG00000166340	TPP1
1023.75	-1.34451	0.0777035	-17.303	4.46341e-67	1.90532e-65	ENSG00000108861	DUSP3
4148.49	-1.80925	0.104617	-17.294	5.2214e-67	2.22194e-65	ENSG00000158062	UBXN11
238.864	0.61024	0.0352921	17.2911	5.4865e-67	2.32052e-65	ENSG00000134291	TMEM106C
4589.49	0.448042	0.0259117	17.2911	5.48703e-67	2.32052e-65	ENSG00000108312	UBTF
1459.93	-0.332494	0.0192498	-17.2726	7.56755e-67	3.19052e-65	ENSG00000148358	GPR107
14958	0.857181	0.0496293	17.2717	7.68692e-67	3.23087e-65	ENSG00000012124	CD22
438.528	0.438144	0.0253682	17.2714	7.72346e-67	3.23627e-65	ENSG00000138796	HADH
231.1	0.955315	0.0553452	17.261	9.24681e-67	3.86273e-65	ENSG00000101400	SNTA1
789.171	0.782027	0.0453254	17.2536	1.0511e-66	4.37747e-65	ENSG00000069966	GNB5
2004.01	-0.333784	0.0193584	-17.2423	1.27804e-66	5.3064e-65	ENSG00000072609	CHFR
60.9477	1.07232	0.062195	17.2412	1.30197e-66	5.38938e-65	ENSG00000183742	MACC1
153.484	0.932963	0.0541227	17.2379	1.37934e-66	5.6924e-65	ENSG00000151729	SLC25A4
1695.02	0.589769	0.0342213	17.2339	1.47733e-66	6.07841e-65	ENSG00000186918	ZNF395
273.498	-1.12072	0.0650667	-17.2242	1.74978e-66	7.17776e-65	ENSG00000171365	CLCN5
532.164	0.92962	0.0539749	17.2232	1.77921e-66	7.27664e-65	ENSG00000177425	PAWR
775.474	-0.487836	0.0283348	-17.2169	1.98488e-66	8.09355e-65	ENSG00000111652	COPS7A
3313.3	0.590454	0.0343223	17.2032	2.5124e-66	1.02141e-64	ENSG00000162144	CYB561A3
607.28	-1.16891	0.0679803	-17.1948	2.90536e-66	1.17766e-64	ENSG00000090674	MCOLN1
1700.34	-0.845488	0.0491931	-17.1871	3.31515e-66	1.33979e-64	ENSG00000135049	AGTPBP1
3430.27	-0.992188	0.0578056	-17.1642	4.9203e-66	1.98264e-64	ENSG00000100368	CSF2RB
2652.4	-0.88696	0.0516987	-17.1563	5.63657e-66	2.26457e-64	ENSG00000116337	AMPD2
1362.13	0.606679	0.0353922	17.1416	7.26303e-66	2.90947e-64	ENSG00000102226	USP11
882.462	0.860489	0.0502004	17.1411	7.32995e-66	2.92769e-64	ENSG00000275342	PRAG1
853.08	-1.03783	0.0605577	-17.1378	7.74915e-66	3.08611e-64	ENSG00000196923	PDLIM7
374.799	-0.912421	0.0532411	-17.1375	7.78736e-66	3.09231e-64	ENSG00000100031	GGT1
1754.27	-0.536196	0.0312943	-17.134	8.27964e-66	3.27826e-64	ENSG00000159346	ADIPOR1
2686.61	-1.23867	0.072296	-17.1334	8.36805e-66	3.30369e-64	ENSG00000110931	CAMKK2
926.368	-0.60072	0.0350668	-17.1307	8.75394e-66	3.44608e-64	ENSG00000118960	HS1BP3
2248.24	-0.655814	0.0382912	-17.127	9.3317e-66	3.66296e-64	ENSG00000101337	TM9SF4
4062.84	0.46745	0.0272995	17.123	9.99444e-66	3.91186e-64	ENSG00000171456	ASXL1
68.9634	-1.51901	0.0887176	-17.1219	1.01943e-65	3.97867e-64	ENSG00000164877	MICALL2
279.717	0.584643	0.034167	17.1113	1.2223e-65	4.75688e-64	ENSG00000176225	RTTN
5043.57	0.999407	0.0584286	17.1048	1.36773e-65	5.30772e-64	ENSG00000213626	LBH
1578.6	-1.3022	0.0761546	-17.0994	1.49853e-65	5.79884e-64	ENSG00000143554	SLC27A3
2778.94	0.87705	0.0512948	17.0982	1.52971e-65	5.90278e-64	ENSG00000082512	TRAF5
439.14	-0.685399	0.040118	-17.0846	1.93319e-65	7.4387e-64	ENSG00000103042	SLC38A7
1320.2	0.484174	0.028342	17.0833	1.97584e-65	7.58144e-64	ENSG00000166398	GARRE1
740.447	0.665795	0.0389807	17.0801	2.08705e-65	7.98573e-64	ENSG00000100852	ARHGAP5
207.525	0.722739	0.0423483	17.0665	2.63368e-65	1.00492e-63	ENSG00000130956	HABP4
843.678	0.46271	0.0271136	17.0656	2.67475e-65	1.01775e-63	ENSG00000118412	CASP8AP2
5726.66	-0.657957	0.0385552	-17.0653	2.6883e-65	1.02006e-63	ENSG00000165458	INPPL1
464.505	0.866789	0.0507957	17.0642	2.74094e-65	1.03715e-63	ENSG00000163376	KBTBD8
511.327	-0.592104	0.034699	-17.064	2.75036e-65	1.03784e-63	ENSG00000100983	GSS
3896.34	-1.00714	0.0590381	-17.0592	2.98613e-65	1.12371e-63	ENSG00000105223	PLD3
1285.23	-0.350389	0.02054	-17.0589	3.00401e-65	1.12733e-63	ENSG00000141580	WDR45B
508.138	0.601328	0.0352609	17.0537	3.28369e-65	1.22891e-63	ENSG00000040199	PHLPP2
57.1735	0.999769	0.0586297	17.0523	3.36301e-65	1.25515e-63	ENSG00000170417	TMEM182
193.983	0.994335	0.0583623	17.0373	4.34351e-65	1.61668e-63	ENSG00000149970	CNKSR2
3765.07	0.616457	0.0361918	17.033	4.67199e-65	1.73422e-63	ENSG00000116852	KIF21B
1630.36	0.529233	0.0310716	17.0327	4.69868e-65	1.7394e-63	ENSG00000127334	DYRK2
1309.56	-1.51285	0.0888214	-17.0325	4.71608e-65	1.74112e-63	ENSG00000213903	LTB4R
1460.18	-1.46573	0.0860811	-17.0274	5.14726e-65	1.89519e-63	ENSG00000140931	CMTM3
1982.12	-1.14585	0.0673132	-17.0226	5.58318e-65	2.05017e-63	ENSG00000049860	HEXB
1605.12	1.05826	0.062184	17.0182	6.0224e-65	2.20552e-63	ENSG00000170989	S1PR1
4056.7	-0.55936	0.0328993	-17.0022	7.91457e-65	2.89072e-63	ENSG00000146828	SLC12A9
281.864	-0.83435	0.0490752	-17.0014	8.01174e-65	2.91841e-63	ENSG00000237765	FAM200B
773.627	-0.749632	0.0440977	-16.9994	8.30152e-65	3.01592e-63	ENSG00000160404	TOR2A
640.521	-0.476618	0.0280473	-16.9934	9.19377e-65	3.33122e-63	ENSG00000156873	PHKG2
7151.98	0.902746	0.0531313	16.9908	9.60169e-65	3.46982e-63	ENSG00000136573	BLK
114.633	0.755466	0.0444698	16.9883	1.00282e-64	3.61438e-63	ENSG00000126016	AMOT
3095.03	-1.60977	0.0947671	-16.9866	1.03221e-64	3.71051e-63	ENSG00000132334	PTPRE
754.693	0.844038	0.0496897	16.9862	1.03928e-64	3.72612e-63	ENSG00000119333	DYNC2I2
755.329	0.645731	0.038036	16.9768	1.21904e-64	4.35917e-63	ENSG00000078687	TNRC6C
2640.34	-0.71426	0.0420741	-16.9762	1.23129e-64	4.3915e-63	ENSG00000117410	ATP6V0B
4545.83	-0.630281	0.0371309	-16.9746	1.26662e-64	4.50572e-63	ENSG00000107372	ZFAND5
233.629	1.09754	0.0647189	16.9585	1.66565e-64	5.90982e-63	ENSG00000123095	BHLHE41
767.259	0.761661	0.0449236	16.9546	1.77985e-64	6.29863e-63	ENSG00000130396	AFDN
2744.18	-0.855813	0.0504869	-16.9512	1.88577e-64	6.65624e-63	ENSG00000140368	PSTPIP1
372.724	0.5498	0.0324376	16.9495	1.94204e-64	6.83717e-63	ENSG00000130921	MTRFR
114.918	-0.896977	0.0529377	-16.944	2.1309e-64	7.48279e-63	ENSG00000155893	PXYLP1
3365.16	-0.383174	0.0226147	-16.9436	2.1474e-64	7.5214e-63	ENSG00000129675	ARHGEF6
619.675	-0.794488	0.0468913	-16.9432	2.16018e-64	7.54683e-63	ENSG00000106012	IQCE
163.349	-1.17639	0.0694447	-16.9399	2.28427e-64	7.95389e-63	ENSG00000168487	BMP1
1340.26	-0.436716	0.0257805	-16.9398	2.28834e-64	7.95389e-63	ENSG00000090581	GNPTG
2442.2	-1.32761	0.0784136	-16.9309	2.6621e-64	9.22953e-63	ENSG00000062716	VMP1
699.115	-1.28205	0.0757238	-16.9306	2.67649e-64	9.25591e-63	ENSG00000196782	MAML3
334.442	-0.851206	0.0502882	-16.9265	2.86738e-64	9.89103e-63	ENSG00000163512	AZI2
3185.14	-0.395592	0.0233831	-16.9179	3.3226e-64	1.14324e-62	ENSG00000174437	ATP2A2
7963.02	-1.18796	0.0702226	-16.917	3.3696e-64	1.1565e-62	ENSG00000093072	ADA2
619.858	0.433787	0.0256488	16.9126	3.63422e-64	1.2442e-62	ENSG00000152942	RAD17
571.338	0.647707	0.0383002	16.9113	3.71327e-64	1.26808e-62	ENSG00000149218	ENDOD1
855.036	-2.01072	0.118935	-16.9061	4.05851e-64	1.38253e-62	ENSG00000204054	LINC00963
2660.08	-1.25729	0.074389	-16.9016	4.38129e-64	1.48877e-62	ENSG00000116260	QSOX1
223.4	-0.634488	0.0375563	-16.8943	4.95518e-64	1.6796e-62	ENSG00000158828	PINK1
1339.95	0.706234	0.0418089	16.892	5.15456e-64	1.74285e-62	ENSG00000111602	TIMELESS
848.279	-0.91879	0.0544129	-16.8855	5.7497e-64	1.93928e-62	ENSG00000103507	BCKDK
666.963	0.995839	0.0589913	16.8811	6.19441e-64	2.08413e-62	ENSG00000006432	MAP3K9
2097.44	-0.78904	0.0467667	-16.8718	7.25064e-64	2.43351e-62	ENSG00000160211	G6PD
2816.18	0.513192	0.0304181	16.8713	7.31819e-64	2.45016e-62	ENSG00000145779	TNFAIP8
178.351	-1.38729	0.0822651	-16.8637	8.31917e-64	2.77848e-62	ENSG00000246082	NUDT16L2P
614.817	0.656256	0.0389196	16.8619	8.58529e-64	2.86037e-62	ENSG00000135632	SMYD5
146.138	0.674717	0.0400272	16.8565	9.40564e-64	3.12606e-62	ENSG00000173041	ZNF680
1012.39	-0.522467	0.0310129	-16.8468	1.10804e-63	3.67374e-62	ENSG00000103005	USB1
198.712	0.783647	0.0465211	16.845	1.14209e-63	3.77747e-62	ENSG00000090097	PCBP4
6001.88	-0.719026	0.0426856	-16.8447	1.14735e-63	3.78569e-62	ENSG00000149781	FERMT3
1849.09	0.366848	0.0217821	16.8417	1.20734e-63	3.97405e-62	ENSG00000066117	SMARCD1
812.825	-1.45374	0.0863227	-16.8407	1.22701e-63	4.02908e-62	ENSG00000130304	SLC27A1
2303.6	-1.32117	0.0784811	-16.8342	1.36975e-63	4.487e-62	ENSG00000141526	SLC16A3
700.926	-0.799572	0.0475015	-16.8325	1.40904e-63	4.60465e-62	ENSG00000177628	GBA
249.927	-1.01186	0.060162	-16.819	1.77118e-63	5.77432e-62	ENSG00000162882	HAAO
906.707	-2.09464	0.124546	-16.8181	1.7972e-63	5.84518e-62	ENSG00000173083	HPSE
729.371	1.00379	0.0597204	16.8082	2.12695e-63	6.90123e-62	ENSG00000076554	TPD52
9886.76	-0.996386	0.0592869	-16.8062	2.1991e-63	7.10822e-62	ENSG00000160796	NBEAL2
5000.92	-1.11316	0.0662358	-16.806	2.20394e-63	7.10822e-62	ENSG00000135821	GLUL
75.1346	0.880066	0.0523662	16.806	2.20636e-63	7.10822e-62	ENSG00000112208	BAG2
563.232	0.909179	0.0541228	16.7984	2.5051e-63	8.05168e-62	ENSG00000247774	PCED1B-AS1
3660.01	-0.974168	0.0580028	-16.7952	2.64596e-63	8.48446e-62	ENSG00000118564	FBXL5
401.502	-1.60145	0.0954065	-16.7855	3.11465e-63	9.96396e-62	ENSG00000166548	TK2
3119.51	-1.33365	0.0794908	-16.7774	3.57218e-63	1.14009e-61	ENSG00000122694	GLIPR2
3349.71	-0.590522	0.0351982	-16.777	3.59284e-63	1.14401e-61	ENSG00000064932	SBNO2
723.802	-0.994011	0.0592553	-16.775	3.7155e-63	1.18032e-61	ENSG00000068024	HDAC4
6812.07	-1.46653	0.0874259	-16.7746	3.74337e-63	1.18641e-61	ENSG00000177663	IL17RA
958.939	0.796742	0.0475001	16.7735	3.81551e-63	1.20648e-61	ENSG00000076604	TRAF4
376.032	0.646186	0.0385326	16.7699	4.05407e-63	1.27895e-61	ENSG00000196911	KPNA5
1873.97	1.02176	0.0609361	16.7677	4.20414e-63	1.32324e-61	ENSG00000164649	CDCA7L
57.5759	0.995892	0.0594004	16.7657	4.34503e-63	1.36444e-61	ENSG00000117215	PLA2G2D
480.853	0.46397	0.0276753	16.7648	4.41598e-63	1.38354e-61	ENSG00000124120	TTPAL
420.477	-1.79377	0.107006	-16.7633	4.52819e-63	1.41545e-61	ENSG00000169026	SLC49A3
3129.56	0.686763	0.0409782	16.7592	4.84772e-63	1.50878e-61	ENSG00000110651	CD81
52.615	0.875825	0.0522592	16.7592	4.84885e-63	1.50878e-61	ENSG00000144451	SPAG16
167.01	0.847609	0.0505916	16.7539	5.29944e-63	1.64524e-61	ENSG00000251034	NA
1944.06	-1.32207	0.0789341	-16.749	5.75823e-63	1.78362e-61	ENSG00000164713	BRI3
2339.99	-0.931563	0.0556245	-16.7473	5.9214e-63	1.83001e-61	ENSG00000140526	ABHD2
3304.39	0.806502	0.0481739	16.7415	6.53531e-63	2.01518e-61	ENSG00000115758	ODC1
65.0475	1.09668	0.0655075	16.7413	6.55346e-63	2.01622e-61	ENSG00000132623	ANKEF1
2344.35	-0.435926	0.0260405	-16.7403	6.66192e-63	2.04498e-61	ENSG00000142687	KIAA0319L
326.168	-1.48979	0.0890842	-16.7233	8.86117e-63	2.71398e-61	ENSG00000111729	CLEC4A
224.399	0.692679	0.0414226	16.7223	9.02417e-63	2.75772e-61	ENSG00000180694	TMEM64
314.296	-0.626843	0.0374952	-16.718	9.69686e-63	2.95668e-61	ENSG00000118369	USP35
1069.91	-0.554078	0.0331501	-16.7142	1.03253e-62	3.13791e-61	ENSG00000151502	VPS26B
822.564	-0.659622	0.0394649	-16.7142	1.03372e-62	3.13791e-61	ENSG00000135912	TTLL4
341.186	0.917915	0.0549245	16.7123	1.06651e-62	3.23028e-61	ENSG00000198168	SVIP
994.995	-0.453915	0.0271638	-16.7103	1.1035e-62	3.33492e-61	ENSG00000108788	MLX
2287.36	-0.903183	0.0540738	-16.7028	1.25087e-62	3.77194e-61	ENSG00000163162	RNF149
607.245	-0.952133	0.0570057	-16.7024	1.25877e-62	3.78741e-61	ENSG00000054983	GALC
777.411	0.58031	0.0347491	16.7	1.31073e-62	3.93507e-61	ENSG00000144659	SLC25A38
53.9662	1.06945	0.0640557	16.6957	1.40909e-62	4.22109e-61	ENSG00000218052	ADAMTS7P4
1726.83	-0.5318	0.0318536	-16.6951	1.42165e-62	4.24939e-61	ENSG00000138029	HADHB
165.906	0.727834	0.0436075	16.6906	1.53477e-62	4.5775e-61	ENSG00000184220	CMSS1
1130.06	-0.72076	0.0431927	-16.6871	1.6276e-62	4.84379e-61	ENSG00000134851	TMEM165
434.693	-1.01077	0.0605869	-16.683	1.74186e-62	5.17256e-61	ENSG00000001036	FUCA2
544.615	-0.953362	0.0571472	-16.6826	1.75549e-62	5.19475e-61	ENSG00000108479	GALK1
143.467	-1.23166	0.0738295	-16.6825	1.75694e-62	5.19475e-61	ENSG00000166503	HDGFL3
2243.24	-0.743916	0.0446048	-16.6779	1.89716e-62	5.59725e-61	ENSG00000168769	TET2
1773.68	0.471436	0.0282801	16.6702	2.15859e-62	6.35483e-61	ENSG00000164985	PSIP1
83.9949	0.973234	0.0583936	16.6668	2.28524e-62	6.71321e-61	ENSG00000169129	AFAP1L2
88.2442	-1.23427	0.0740603	-16.6658	2.32342e-62	6.80976e-61	ENSG00000274922	NA
743.952	-1.25566	0.0753439	-16.6657	2.32808e-62	6.80976e-61	ENSG00000149782	PLCB3
1561.16	-0.558021	0.0334839	-16.6653	2.34144e-62	6.83422e-61	ENSG00000197586	ENTPD6
149.211	-1.34227	0.0805621	-16.6613	2.5036e-62	7.29193e-61	ENSG00000142046	TMEM91
482.737	-1.63888	0.0983664	-16.6609	2.52022e-62	7.32472e-61	ENSG00000114812	VIPR1
304.294	-0.829501	0.0497894	-16.6602	2.55228e-62	7.40215e-61	ENSG00000273033	LINC02035
926.556	-0.357826	0.0214799	-16.6586	2.61887e-62	7.57918e-61	ENSG00000131626	PPFIA1
4379.08	0.669606	0.0401964	16.6584	2.6315e-62	7.59965e-61	ENSG00000105738	SIPA1L3
253.777	-0.872099	0.0523531	-16.658	2.64631e-62	7.6263e-61	ENSG00000070540	WIPI1
703.427	0.902797	0.0542061	16.6549	2.78759e-62	8.01653e-61	ENSG00000159618	ADGRG5
1285.91	0.687635	0.0412882	16.6545	2.80675e-62	8.04439e-61	ENSG00000196937	FAM3C
535.369	-0.955578	0.0573767	-16.6545	2.80906e-62	8.04439e-61	ENSG00000148288	GBGT1
157.259	-0.839509	0.0504204	-16.6502	3.01622e-62	8.61958e-61	ENSG00000260916	CCPG1
1295.49	-0.577007	0.0346659	-16.6448	3.30113e-62	9.41408e-61	ENSG00000088812	ATRN
405.764	-0.712035	0.0427874	-16.6412	3.50395e-62	9.97167e-61	ENSG00000172292	CERS6
93.8071	0.961087	0.0577597	16.6394	3.61224e-62	1.02585e-60	ENSG00000049192	ADAMTS6
1193.9	0.660296	0.0396858	16.6381	3.69152e-62	1.04618e-60	ENSG00000010818	HIVEP2
17593.1	-1.0125	0.0608573	-16.6372	3.74635e-62	1.05953e-60	ENSG00000084234	APLP2
248.598	0.647332	0.038935	16.626	4.51976e-62	1.27562e-60	ENSG00000181894	ZNF329
5883.85	-1.30103	0.0782588	-16.6247	4.61824e-62	1.30072e-60	ENSG00000131238	PPT1
4915.9	-0.521039	0.0313502	-16.6199	4.99822e-62	1.40485e-60	ENSG00000015285	WAS
597.017	-1.51675	0.0912743	-16.6175	5.20511e-62	1.46e-60	ENSG00000150457	LATS2
399.045	-0.899113	0.0541069	-16.6173	5.21925e-62	1.46096e-60	ENSG00000102393	GLA
2996.64	0.571989	0.0344236	16.6162	5.32272e-62	1.48688e-60	ENSG00000178913	TAF7
1276.64	0.52592	0.0316569	16.6131	5.60011e-62	1.56117e-60	ENSG00000168944	CEP120
1889.99	-0.533177	0.032095	-16.6125	5.66138e-62	1.57504e-60	ENSG00000109323	MANBA
3256.08	-0.863221	0.0519651	-16.6116	5.7477e-62	1.5958e-60	ENSG00000021355	SERPINB1
795.41	0.383994	0.023119	16.6094	5.95484e-62	1.64848e-60	ENSG00000153107	ANAPC1
847.814	-0.654598	0.0394114	-16.6094	5.96157e-62	1.64848e-60	ENSG00000099785	MARCHF2
1899.7	-0.517938	0.0312002	-16.6005	6.91346e-62	1.90784e-60	ENSG00000090487	SPG21
1030.89	-1.13879	0.0686226	-16.595	7.57689e-62	2.0867e-60	ENSG00000099337	KCNK6
280.426	0.768777	0.0463353	16.5916	8.0142e-62	2.2027e-60	ENSG00000189369	GSPT2
479.923	-0.948809	0.0571996	-16.5877	8.55631e-62	2.34697e-60	ENSG00000143409	MINDY1
317.093	0.567057	0.0341931	16.5839	9.10779e-62	2.49324e-60	ENSG00000081386	ZNF510
951.282	-0.999612	0.0602769	-16.5837	9.14469e-62	2.49833e-60	ENSG00000106991	ENG
3151.87	-0.992348	0.0598431	-16.5825	9.32643e-62	2.5429e-60	ENSG00000119900	OGFRL1
401.32	1.07102	0.0645889	16.5821	9.39602e-62	2.55677e-60	ENSG00000152894	PTPRK
621.697	-1.10749	0.0668007	-16.579	9.87801e-62	2.68258e-60	ENSG00000173638	SLC19A1
218.773	1.06322	0.0641332	16.5784	9.99014e-62	2.70765e-60	ENSG00000005884	ITGA3
135.64	0.796901	0.048071	16.5776	1.01202e-61	2.73747e-60	ENSG00000198182	ZNF607
161.34	-1.46482	0.0883636	-16.5772	1.0184e-61	2.74928e-60	ENSG00000168389	MFSD2A
1165.39	-1.06982	0.0645636	-16.57	1.14915e-61	3.09614e-60	ENSG00000168404	MLKL
5514.35	-1.52024	0.091748	-16.5698	1.15249e-61	3.09902e-60	ENSG00000104870	FCGRT
117.929	-1.14782	0.0692804	-16.5677	1.19295e-61	3.20152e-60	ENSG00000162881	OXER1
1528.33	0.585497	0.0353425	16.5664	1.21976e-61	3.26704e-60	ENSG00000108559	NUP88
472.949	-0.537653	0.0324879	-16.5493	1.61879e-61	4.32732e-60	ENSG00000189077	TMEM120A
970.55	-0.761358	0.0460122	-16.5469	1.68588e-61	4.49788e-60	ENSG00000141905	NFIC
759.016	-1.10889	0.067028	-16.5437	1.77716e-61	4.73021e-60	ENSG00000119979	DENND10
268.023	-1.06046	0.0641007	-16.5436	1.77989e-61	4.73021e-60	ENSG00000205593	DENND6B
459.326	0.551794	0.033355	16.5431	1.79673e-61	4.76569e-60	ENSG00000117543	DPH5
2258.52	-0.580017	0.0350721	-16.5378	1.95925e-61	5.18668e-60	ENSG00000134440	NARS1
249.266	0.504797	0.0305392	16.5295	2.24948e-61	5.9435e-60	ENSG00000090612	ZNF268
1491.53	-0.870096	0.0526423	-16.5285	2.28936e-61	6.0372e-60	ENSG00000127838	PNKD
145.987	-0.787185	0.0476329	-16.5261	2.38194e-61	6.26924e-60	ENSG00000087301	TXNDC16
161.899	0.833623	0.0504564	16.5217	2.56262e-61	6.7318e-60	ENSG00000172915	NBEA
134.184	-1.3756	0.083264	-16.521	2.59201e-61	6.79594e-60	ENSG00000103876	FAH
2716.3	0.496286	0.0300582	16.5108	3.066e-61	8.02329e-60	ENSG00000150593	PDCD4
4557.81	-1.35208	0.0818923	-16.5105	3.08217e-61	8.05018e-60	ENSG00000147416	ATP6V1B2
9872.6	-1.06698	0.0646325	-16.5085	3.18784e-61	8.31027e-60	ENSG00000137841	PLCB2
231.086	0.830237	0.0503137	16.5012	3.59585e-61	9.35606e-60	ENSG00000111962	UST
422.498	-0.650821	0.039443	-16.5003	3.65126e-61	9.48217e-60	ENSG00000162129	CLPB
4053.74	-1.28489	0.0778727	-16.4998	3.67991e-61	9.53843e-60	ENSG00000100300	TSPO
89.0722	-1.21051	0.0733723	-16.4981	3.78343e-61	9.78818e-60	ENSG00000224597	SVIL-AS1
2231.19	-1.5107	0.0915768	-16.4966	3.88321e-61	1.00116e-59	ENSG00000177674	AGTRAP
1125.19	0.446519	0.0270676	16.4965	3.89082e-61	1.00116e-59	ENSG00000075884	ARHGAP15
500.099	-0.774582	0.0469545	-16.4964	3.89177e-61	1.00116e-59	ENSG00000112242	E2F3
120.854	0.848547	0.0514589	16.4898	4.34403e-61	1.1154e-59	ENSG00000130005	GAMT
3478.38	-0.858111	0.0520408	-16.4892	4.38671e-61	1.12425e-59	ENSG00000197006	METTL9
811.603	0.436275	0.026461	16.4875	4.51434e-61	1.15479e-59	ENSG00000120942	UBIAD1
9594.04	-0.689854	0.0418904	-16.4681	6.22055e-61	1.58827e-59	ENSG00000186635	ARAP1
766.158	0.573043	0.0348028	16.4654	6.50102e-61	1.65679e-59	ENSG00000137337	MDC1
3263.97	-0.926367	0.0562652	-16.4643	6.62173e-61	1.68441e-59	ENSG00000254470	AP5B1
186.228	0.5988	0.0363783	16.4603	7.07011e-61	1.79512e-59	ENSG00000118965	WDR35
4668.04	-0.881563	0.0535613	-16.459	7.23401e-61	1.83131e-59	ENSG00000172936	MYD88
202.679	-2.07107	0.125833	-16.4589	7.23944e-61	1.83131e-59	ENSG00000197558	SSPOP
9844.12	-1.09605	0.0666088	-16.4551	7.71198e-61	1.94724e-59	ENSG00000066336	SPI1
70.7067	0.675113	0.0410348	16.4522	8.08559e-61	2.03781e-59	ENSG00000001460	STPG1
536.192	0.822593	0.050021	16.445	9.11495e-61	2.293e-59	ENSG00000224078	SNHG14
1929.52	0.449175	0.0273243	16.4386	1.01148e-60	2.53985e-59	ENSG00000076770	MBNL3
2825.6	-1.27671	0.0776777	-16.436	1.0566e-60	2.64828e-59	ENSG00000196189	SEMA4A
1984.17	-0.596039	0.0362669	-16.4348	1.07791e-60	2.69675e-59	ENSG00000197070	ARRDC1
732.094	-0.846924	0.0515386	-16.4328	1.11391e-60	2.78172e-59	ENSG00000134352	IL6ST
1296.84	0.873751	0.0531753	16.4315	1.13774e-60	2.83605e-59	ENSG00000143515	ATP8B2
3513.06	-0.801389	0.0487729	-16.431	1.14727e-60	2.85458e-59	ENSG00000159720	ATP6V0D1
3105.34	-0.717186	0.0436501	-16.4304	1.15966e-60	2.88018e-59	ENSG00000112531	QKI
3473.06	-0.754785	0.0459549	-16.4245	1.27784e-60	3.16792e-59	ENSG00000196961	AP2A1
1671.53	-0.913433	0.0556274	-16.4206	1.36298e-60	3.37288e-59	ENSG00000170266	GLB1
5802.87	-0.521423	0.0317548	-16.4203	1.36997e-60	3.38405e-59	ENSG00000160410	SHKBP1
248.328	0.542901	0.0330631	16.4201	1.37282e-60	3.38498e-59	ENSG00000080839	RBL1
2578.55	-1.02308	0.0623176	-16.4173	1.43892e-60	3.54157e-59	ENSG00000182022	CHST15
15587.3	-1.00469	0.0612003	-16.4164	1.46085e-60	3.58906e-59	ENSG00000000938	FGR
513.292	0.644761	0.0392758	16.4162	1.46369e-60	3.58959e-59	ENSG00000120162	MOB3B
4696.03	-0.701139	0.042716	-16.414	1.51927e-60	3.71921e-59	ENSG00000130309	COLGALT1
745.849	-0.717733	0.0437306	-16.4126	1.55389e-60	3.79717e-59	ENSG00000167645	YIF1B
1910.3	-0.796912	0.0485809	-16.4038	1.79639e-60	4.3819e-59	ENSG00000096968	JAK2
523.344	0.33584	0.0204755	16.4021	1.84882e-60	4.50176e-59	ENSG00000116138	DNAJC16
298.982	-1.47787	0.090106	-16.4015	1.86694e-60	4.53778e-59	ENSG00000179104	TMTC2
1101.59	-0.900608	0.0549195	-16.3987	1.95339e-60	4.7395e-59	ENSG00000093010	COMT
2903.85	-0.769615	0.0469453	-16.3939	2.11496e-60	5.12139e-59	ENSG00000160216	AGPAT3
57.5054	-1.38322	0.0843746	-16.3938	2.11829e-60	5.12139e-59	ENSG00000148200	NR6A1
279.119	-0.629486	0.0384034	-16.3914	2.20279e-60	5.31627e-59	ENSG00000143771	CNIH4
83.9317	0.837965	0.0511384	16.3862	2.39934e-60	5.78043e-59	ENSG00000164440	TXLNB
521.696	-1.14805	0.0700866	-16.3804	2.63812e-60	6.34448e-59	ENSG00000074855	ANO8
149.285	0.599706	0.0366159	16.3783	2.73295e-60	6.561e-59	ENSG00000196437	ZNF569
3670.34	-1.24108	0.0757812	-16.3772	2.78436e-60	6.67269e-59	ENSG00000137752	CASP1
656.126	-1.20103	0.0733461	-16.3748	2.89319e-60	6.92137e-59	ENSG00000124588	NQO2
212.528	0.974243	0.059498	16.3744	2.91416e-60	6.95934e-59	ENSG00000002745	WNT16
2663.68	-0.814729	0.0497603	-16.3731	2.97696e-60	7.0969e-59	ENSG00000182220	ATP6AP2
5688.46	-0.726847	0.0444042	-16.3689	3.18961e-60	7.5906e-59	ENSG00000023191	RNH1
2429.15	-1.56441	0.0955731	-16.3687	3.19773e-60	7.59669e-59	ENSG00000089159	PXN
2298.14	-0.816735	0.0499004	-16.3673	3.27424e-60	7.76494e-59	ENSG00000134686	PHC2
14364.6	-1.37157	0.083801	-16.367	3.29021e-60	7.7893e-59	ENSG00000142347	MYO1F
177.36	-0.591299	0.03616	-16.3523	4.18929e-60	9.90064e-59	ENSG00000111684	LPCAT3
337.02	-0.753234	0.0460903	-16.3426	4.91407e-60	1.15935e-58	ENSG00000213699	SLC35F6
637.945	1.07007	0.0654786	16.3423	4.93399e-60	1.16204e-58	ENSG00000128218	VPREB3
290.583	0.848759	0.0519578	16.3356	5.51273e-60	1.29611e-58	ENSG00000125885	MCM8
559.052	0.377735	0.0231239	16.3353	5.53962e-60	1.30019e-58	ENSG00000166260	COX11
207.764	0.457832	0.0280331	16.3318	5.8592e-60	1.37284e-58	ENSG00000100478	AP4S1
238.064	-1.74918	0.107108	-16.331	5.94512e-60	1.39059e-58	ENSG00000173548	SNX33
2448.59	-0.6252	0.0383046	-16.3218	6.90935e-60	1.61336e-58	ENSG00000164088	PPM1M
6011.94	0.776797	0.0476078	16.3166	7.52283e-60	1.75362e-58	ENSG00000204252	HLA-DOA
647.244	-1.11405	0.0683053	-16.3099	8.39607e-60	1.95384e-58	ENSG00000225697	SLC26A6
620.822	-0.995325	0.06103	-16.3088	8.54878e-60	1.98599e-58	ENSG00000113273	ARSB
18980.2	-1.00834	0.0618387	-16.306	8.95158e-60	2.07604e-58	ENSG00000165168	CYBB
9379.96	-0.972368	0.0596405	-16.3038	9.26955e-60	2.14614e-58	ENSG00000142634	EFHD2
2120.97	1.04837	0.0643067	16.3027	9.44788e-60	2.18372e-58	ENSG00000135916	ITM2C
547.544	0.526719	0.032316	16.299	1.0025e-59	2.31319e-58	ENSG00000127191	TRAF2
125.136	-1.40853	0.0864729	-16.2887	1.18775e-59	2.73603e-58	ENSG00000163521	GLB1L
731.827	-1.07671	0.0661031	-16.2883	1.19548e-59	2.7492e-58	ENSG00000165071	TMEM71
854.187	-0.860443	0.0528332	-16.286	1.24002e-59	2.84683e-58	ENSG00000170892	TSEN34
3719.23	0.624492	0.0383528	16.2828	1.30705e-59	2.99569e-58	ENSG00000147457	CHMP7
594.263	0.479559	0.0294543	16.2814	1.33712e-59	3.05947e-58	ENSG00000139291	TMEM19
1198.63	0.816911	0.0501782	16.2802	1.36415e-59	3.1161e-58	ENSG00000151748	SAV1
6930.39	0.663786	0.0408038	16.2677	1.67192e-59	3.81277e-58	ENSG00000135074	ADAM19
8542.88	-1.38118	0.0849047	-16.2674	1.6818e-59	3.8289e-58	ENSG00000169896	ITGAM
3331.74	-0.819525	0.0503792	-16.2671	1.68879e-59	3.83843e-58	ENSG00000115310	RTN4
238.47	-1.03497	0.0636336	-16.2646	1.76154e-59	3.99712e-58	ENSG00000138463	SLC49A4
718.644	-0.695614	0.0427691	-16.2644	1.76551e-59	3.99949e-58	ENSG00000135124	P2RX4
1558.29	-0.60732	0.0373426	-16.2635	1.79342e-59	4.05597e-58	ENSG00000051009	FHIP1B
3024.66	-0.874129	0.0537639	-16.2586	1.93972e-59	4.37961e-58	ENSG00000178719	GRINA
2069.44	0.441826	0.0271772	16.2573	1.98377e-59	4.47167e-58	ENSG00000129071	MBD4
259.167	0.560982	0.0345281	16.2471	2.34207e-59	5.27062e-58	ENSG00000247626	MARS2
176.951	0.93902	0.0578028	16.2452	2.41423e-59	5.42407e-58	ENSG00000198934	MAGEE1
1368.2	-1.01918	0.0627516	-16.2415	2.56483e-59	5.75296e-58	ENSG00000188921	HACD4
312.643	-0.31542	0.0194281	-16.2353	2.84072e-59	6.36135e-58	ENSG00000158796	DEDD
2089.65	-0.921575	0.056766	-16.2346	2.86988e-59	6.41613e-58	ENSG00000118855	MFSD1
1289.24	-0.490891	0.0302515	-16.227	3.24887e-59	7.25157e-58	ENSG00000135930	EIF4E2
2030.78	-0.599815	0.0369753	-16.222	3.52266e-59	7.84984e-58	ENSG00000080815	PSEN1
1685.19	0.849592	0.0523777	16.2205	3.61231e-59	8.0365e-58	ENSG00000065923	SLC9A7
616.721	0.682115	0.0420649	16.2158	3.90108e-59	8.66483e-58	ENSG00000175893	ZDHHC21
5210.25	-0.960982	0.0592658	-16.2148	3.96483e-59	8.79213e-58	ENSG00000104763	ASAH1
335.868	-1.40983	0.0869994	-16.2051	4.64189e-59	1.02769e-57	ENSG00000196371	FUT4
2038.76	-0.784922	0.0484389	-16.2044	4.69594e-59	1.03797e-57	ENSG00000104765	BNIP3L
563.117	-1.28578	0.0793646	-16.2009	4.96836e-59	1.09641e-57	ENSG00000135052	GOLM1
5924.95	-0.70072	0.0432593	-16.1982	5.19662e-59	1.14493e-57	ENSG00000008130	NADK
714.509	-0.78592	0.0485231	-16.1968	5.30947e-59	1.16791e-57	ENSG00000101457	DNTTIP1
370.087	-0.734	0.0453222	-16.1952	5.45643e-59	1.19831e-57	ENSG00000136783	NIPSNAP3A
1714	-0.786301	0.0485592	-16.1926	5.68524e-59	1.24656e-57	ENSG00000052749	RRP12
84.2426	1.14137	0.070491	16.1917	5.77174e-59	1.26349e-57	ENSG00000165895	ARHGAP42
1715.76	-0.576622	0.0356207	-16.1879	6.14379e-59	1.34279e-57	ENSG00000165102	HGSNAT
5564.39	-0.659553	0.0407455	-16.1872	6.21349e-59	1.35585e-57	ENSG00000013364	MVP
1174.28	-0.431958	0.0266884	-16.1852	6.41489e-59	1.39757e-57	ENSG00000071859	FAM50A
4446.57	-0.705845	0.0436245	-16.18	6.97854e-59	1.51794e-57	ENSG00000172932	ANKRD13D
390.348	0.574404	0.0355049	16.1782	7.19142e-59	1.56176e-57	ENSG00000235106	BRD3OS
485.47	-0.757056	0.0468039	-16.1751	7.56242e-59	1.63972e-57	ENSG00000134590	RTL8C
79.7981	-0.912991	0.0564667	-16.1687	8.38797e-59	1.81584e-57	ENSG00000188603	CLN3
2621.33	-1.78331	0.11031	-16.1664	8.70529e-59	1.88155e-57	ENSG00000161638	ITGA5
503.981	-2.13992	0.132428	-16.1591	9.79341e-59	2.1134e-57	ENSG00000074660	SCARF1
371.448	-1.10307	0.0682735	-16.1566	1.01975e-58	2.19712e-57	ENSG00000173950	XXYLT1
466.133	0.421013	0.0260614	16.1547	1.0528e-58	2.26476e-57	ENSG00000100578	KIAA0586
948.942	-0.284467	0.0176103	-16.1534	1.07425e-58	2.30726e-57	ENSG00000168887	C2orf68
176.563	-1.18738	0.0735177	-16.151	1.11768e-58	2.39679e-57	ENSG00000139531	SUOX
292.84	-0.887391	0.0549634	-16.1451	1.22925e-58	2.63131e-57	ENSG00000116815	CD58
930.231	-0.729586	0.0451895	-16.145	1.2309e-58	2.63131e-57	ENSG00000145391	SETD7
2740.81	0.448822	0.0277999	16.1447	1.23716e-58	2.64055e-57	ENSG00000182199	SHMT2
3014.79	-1.27804	0.0791937	-16.1382	1.37477e-58	2.92969e-57	ENSG00000133318	RTN3
204.627	0.743385	0.0460677	16.1368	1.40619e-58	2.99198e-57	ENSG00000171649	ZIK1
1711.22	-0.616306	0.0381947	-16.1359	1.42671e-58	3.03093e-57	ENSG00000153317	ASAP1
3036.5	-1.23062	0.0762776	-16.1335	1.48373e-58	3.14717e-57	ENSG00000182287	AP1S2
270.95	-1.80684	0.112006	-16.1317	1.52663e-58	3.23314e-57	ENSG00000135519	KCNH3
963.033	-1.65238	0.102438	-16.1306	1.55546e-58	3.28911e-57	ENSG00000183696	UPP1
692.981	1.12027	0.0694698	16.126	1.6766e-58	3.53977e-57	ENSG00000128268	MGAT3
31.0057	-1.07163	0.0664562	-16.1254	1.69287e-58	3.56862e-57	ENSG00000255857	PXN-AS1
1159.23	-0.75968	0.0471268	-16.1199	1.84912e-58	3.89199e-57	ENSG00000156642	NPTN
1173.33	-1.11226	0.0690077	-16.1178	1.91201e-58	4.01817e-57	ENSG00000151176	PLBD2
810.779	-0.479009	0.0297233	-16.1156	1.98295e-58	4.16085e-57	ENSG00000151893	CACUL1
113.667	0.928919	0.0576572	16.1111	2.13348e-58	4.46984e-57	ENSG00000168785	TSPAN5
573.369	0.703964	0.0437226	16.1007	2.52234e-58	5.27645e-57	ENSG00000114126	TFDP2
1386.5	0.382069	0.0237317	16.0995	2.57168e-58	5.37143e-57	ENSG00000121104	FAM117A
1094.37	-1.11095	0.0690126	-16.0977	2.64708e-58	5.52048e-57	ENSG00000197122	SRC
555.288	0.617521	0.0383621	16.0972	2.66967e-58	5.5591e-57	ENSG00000196914	ARHGEF12
439.48	-1.82926	0.113704	-16.0879	3.10112e-58	6.44769e-57	ENSG00000142552	RCN3
689.678	-1.22317	0.076047	-16.0844	3.28425e-58	6.81807e-57	ENSG00000104324	CPQ
1417.4	0.755462	0.0469714	16.0834	3.33362e-58	6.91005e-57	ENSG00000147905	ZCCHC7
2458.51	-0.727629	0.045252	-16.0795	3.55242e-58	7.35244e-57	ENSG00000088832	FKBP1A
6529.79	-0.693068	0.043103	-16.0793	3.56123e-58	7.35953e-57	ENSG00000182095	TNRC18
2476.88	0.368658	0.0229283	16.0787	3.59835e-58	7.42499e-57	ENSG00000006062	MAP3K14
7260.89	-0.649257	0.0403831	-16.0774	3.67281e-58	7.56722e-57	ENSG00000136156	ITM2B
2080.45	-0.327403	0.0203658	-16.0762	3.74851e-58	7.71154e-57	ENSG00000081791	DELE1
1127.98	-1.19592	0.074396	-16.0751	3.81255e-58	7.83149e-57	ENSG00000142185	TRPM2
2413.08	0.530892	0.0330276	16.0742	3.86991e-58	7.93738e-57	ENSG00000131196	NFATC1
479.775	1.05832	0.0658439	16.0731	3.9373e-58	8.06349e-57	ENSG00000148516	ZEB1
457.859	-1.1796	0.0734096	-16.0688	4.2228e-58	8.63525e-57	ENSG00000163393	SLC22A15
157.172	-1.61069	0.100241	-16.0683	4.2569e-58	8.69196e-57	ENSG00000185909	KLHDC8B
98.6118	0.823539	0.0512552	16.0674	4.316e-58	8.79949e-57	ENSG00000184860	SDR42E1
4662.28	-1.23493	0.0768731	-16.0645	4.52618e-58	9.21424e-57	ENSG00000155465	SLC7A7
4507.04	-0.443239	0.0275924	-16.0638	4.57437e-58	9.2985e-57	ENSG00000060491	OGFR
3525.39	-0.350359	0.0218208	-16.0562	5.17243e-58	1.04986e-56	ENSG00000105401	CDC37
174.374	-2.10416	0.131061	-16.0547	5.29577e-58	1.0733e-56	ENSG00000183723	CMTM4
72.4457	0.885828	0.0552074	16.0455	6.14976e-58	1.24453e-56	ENSG00000214711	CAPN14
936.354	0.474675	0.0295842	16.0449	6.20853e-58	1.25456e-56	ENSG00000153944	MSI2
1284.28	-1.96589	0.122587	-16.0366	7.08766e-58	1.43009e-56	ENSG00000167207	NOD2
179.522	-0.645877	0.0402787	-16.0352	7.25353e-58	1.4614e-56	ENSG00000224086	PPM1F-AS1
752.076	-0.779407	0.0486328	-16.0264	8.36482e-58	1.68282e-56	ENSG00000162430	SELENON
1527.24	0.74419	0.0464427	16.0238	8.70972e-58	1.74963e-56	ENSG00000158481	CD1C
395.834	-0.831234	0.0518844	-16.0209	9.13248e-58	1.83186e-56	ENSG00000159082	SYNJ1
437.838	-1.68518	0.105213	-16.0169	9.7386e-58	1.95058e-56	ENSG00000151458	ANKRD50
235.736	-0.847316	0.052903	-16.0164	9.81394e-58	1.96279e-56	ENSG00000103066	PLA2G15
73.4575	-2.00103	0.124937	-16.0163	9.83368e-58	1.96386e-56	ENSG00000261596	NA
36973	-1.2211	0.0762503	-16.0144	1.01429e-57	2.02267e-56	ENSG00000163131	CTSS
7978.61	-0.619379	0.0386941	-16.0071	1.14046e-57	2.27095e-56	ENSG00000101265	RASSF2
550.107	-0.844691	0.0527782	-16.0046	1.18746e-57	2.36109e-56	ENSG00000160703	NLRX1
1729.47	-0.233667	0.0146016	-16.0029	1.22037e-57	2.42299e-56	ENSG00000103510	KAT8
188.183	-1.14068	0.0712875	-16.0011	1.25578e-57	2.48968e-56	ENSG00000162946	DISC1
517.688	1.07413	0.0671488	15.9962	1.35826e-57	2.68895e-56	ENSG00000105926	PALS2
737.64	-0.806842	0.0504429	-15.9952	1.38094e-57	2.72991e-56	ENSG00000146425	DYNLT1
131.228	-1.44581	0.0903961	-15.9942	1.40211e-57	2.76775e-56	ENSG00000101342	TLDC2
478.906	0.710975	0.0444812	15.9837	1.66015e-57	3.27238e-56	ENSG00000163935	SFMBT1
968.178	-1.72126	0.107713	-15.9799	1.76303e-57	3.47017e-56	ENSG00000136161	RCBTB2
68.7907	0.658275	0.0411955	15.9793	1.78227e-57	3.5028e-56	ENSG00000279348	NA
516.036	-1.7138	0.107252	-15.9792	1.78474e-57	3.5028e-56	ENSG00000160013	PTGIR
140.4	-1.03385	0.0647087	-15.977	1.84801e-57	3.62178e-56	ENSG00000067191	CACNB1
14774.7	-1.21045	0.0757943	-15.9702	2.06249e-57	4.03633e-56	ENSG00000163931	TKT
65.3499	0.747708	0.0468401	15.963	2.31447e-57	4.52298e-56	ENSG00000180479	ZNF571
3866.8	-1.09246	0.068441	-15.9621	2.34584e-57	4.57773e-56	ENSG00000153786	ZDHHC7
40181.8	-1.1599	0.0726805	-15.9589	2.46904e-57	4.81129e-56	ENSG00000160255	ITGB2
2048.46	-0.564024	0.0353439	-15.9582	2.49904e-57	4.8628e-56	ENSG00000149357	LAMTOR1
183.638	0.528256	0.0331033	15.9578	2.51441e-57	4.88575e-56	ENSG00000245680	ZNF585B
1290.47	-1.51172	0.0947706	-15.9513	2.7891e-57	5.4118e-56	ENSG00000067836	ROGDI
93.1028	-1.87626	0.117668	-15.9454	3.06883e-57	5.94613e-56	ENSG00000101384	JAG1
1445.89	-0.590433	0.037036	-15.9421	3.23089e-57	6.25128e-56	ENSG00000266028	SRGAP2
881.761	-0.338625	0.0212549	-15.9316	3.82466e-57	7.38965e-56	ENSG00000108039	XPNPEP1
893.023	-0.570815	0.0358313	-15.9306	3.885e-57	7.49563e-56	ENSG00000123636	BAZ2B
335.652	0.590157	0.0370479	15.9296	3.95122e-57	7.61265e-56	ENSG00000064651	SLC12A2
6317.39	-1.69628	0.106534	-15.9224	4.42753e-57	8.51832e-56	ENSG00000025708	TYMP
566.239	-0.623917	0.0391906	-15.9201	4.59931e-57	8.83636e-56	ENSG00000118495	PLAGL1
481.277	-0.942439	0.0592193	-15.9144	5.03522e-57	9.66027e-56	ENSG00000162104	ADCY9
379.948	0.609541	0.0383029	15.9137	5.08871e-57	9.7492e-56	ENSG00000174996	KLC2
5045.65	-0.962973	0.0605515	-15.9034	6.0042e-57	1.1487e-55	ENSG00000026025	VIM
1781.86	-1.65053	0.103818	-15.8983	6.50613e-57	1.24299e-55	ENSG00000132694	ARHGEF11
1310.02	-1.48432	0.0934029	-15.8916	7.24836e-57	1.38286e-55	ENSG00000130830	MPP1
278.297	-1.58805	0.0999314	-15.8914	7.27072e-57	1.38519e-55	ENSG00000115318	LOXL3
66.8315	0.558055	0.0351308	15.8851	8.04167e-57	1.52993e-55	ENSG00000087299	L2HGDH
1995.34	-1.01484	0.0639473	-15.8699	1.02432e-56	1.94606e-55	ENSG00000005893	LAMP2
486.954	0.440536	0.027767	15.8655	1.0987e-56	2.08447e-55	ENSG00000042088	TDP1
835.7	0.400823	0.0252647	15.8649	1.10872e-56	2.10058e-55	ENSG00000107077	KDM4C
4098.41	-0.931	0.0586942	-15.8619	1.16389e-56	2.20204e-55	ENSG00000084207	GSTP1
1032.12	-0.738667	0.046575	-15.8597	1.2041e-56	2.27497e-55	ENSG00000130449	ZSWIM6
1305.29	-0.915274	0.0577109	-15.8596	1.20619e-56	2.27576e-55	ENSG00000119655	NPC2
1610.55	0.811995	0.0512053	15.8576	1.24513e-56	2.346e-55	ENSG00000114446	IFT57
980.202	-1.31439	0.0829061	-15.854	1.31911e-56	2.48197e-55	ENSG00000141401	IMPA2
6933.97	-0.590824	0.0372688	-15.853	1.33932e-56	2.51653e-55	ENSG00000087266	SH3BP2
3791.25	-0.474711	0.0299495	-15.8504	1.39731e-56	2.62187e-55	ENSG00000186815	TPCN1
432.075	-0.615349	0.0388267	-15.8486	1.43719e-56	2.69301e-55	ENSG00000175182	FAM131A
270.48	-1.32901	0.0838678	-15.8465	1.48726e-56	2.78301e-55	ENSG00000172197	MBOAT1
603.146	0.727346	0.0459119	15.8422	1.59191e-56	2.97475e-55	ENSG00000185800	DMWD
259.94	1.01271	0.06393	15.841	1.62287e-56	3.02847e-55	ENSG00000205683	DPF3
1440.71	-1.50481	0.0950524	-15.8314	1.89011e-56	3.52237e-55	ENSG00000035862	TIMP2
242.347	0.54966	0.0347217	15.8304	1.91892e-56	3.57118e-55	ENSG00000005448	WDR54
685.783	-0.76032	0.048052	-15.8229	2.16406e-56	4.02191e-55	ENSG00000161533	ACOX1
1994.67	-1.55186	0.0980945	-15.82	2.264e-56	4.20193e-55	ENSG00000273749	CYFIP1
254.789	0.593915	0.0375466	15.8181	2.33578e-56	4.32928e-55	ENSG00000058056	USP13
1344.83	-0.446157	0.0282058	-15.818	2.33982e-56	4.33088e-55	ENSG00000066322	ELOVL1
250.714	-1.51956	0.0960797	-15.8156	2.42908e-56	4.49001e-55	ENSG00000070371	CLTCL1
2009.06	0.517358	0.0327167	15.8133	2.52107e-56	4.65376e-55	ENSG00000198586	TLK1
127.379	0.858376	0.0542831	15.813	2.53263e-56	4.66879e-55	ENSG00000107779	BMPR1A
75973.3	0.798119	0.0504746	15.8123	2.56058e-56	4.71395e-55	ENSG00000211899	IGHM
5058.12	-0.878512	0.0555608	-15.8117	2.58338e-56	4.74952e-55	ENSG00000100364	KIAA0930
1103.76	-1.01032	0.0639031	-15.8101	2.64849e-56	4.86268e-55	ENSG00000167566	NCKAP5L
473.735	-1.89825	0.120068	-15.8098	2.66354e-56	4.88375e-55	ENSG00000183386	FHL3
104.339	0.729777	0.0461643	15.8083	2.72942e-56	4.9948e-55	ENSG00000185869	ZNF829
5323.56	-1.31363	0.083098	-15.8082	2.73142e-56	4.9948e-55	ENSG00000142657	PGD
1310.22	-1.25288	0.0792566	-15.8079	2.74251e-56	5.00837e-55	ENSG00000083444	PLOD1
1313.19	-0.244602	0.0154774	-15.8039	2.92551e-56	5.33544e-55	ENSG00000111361	EIF2B1
828.857	-0.821225	0.0519702	-15.8018	3.02138e-56	5.49759e-55	ENSG00000204386	NEU1
619.95	-1.66592	0.105426	-15.8018	3.02247e-56	5.49759e-55	ENSG00000132535	DLG4
5241.3	-1.38799	0.0878501	-15.7996	3.13304e-56	5.69113e-55	ENSG00000171298	GAA
2544.07	-1.2708	0.0804381	-15.7985	3.18516e-56	5.77812e-55	ENSG00000125505	MBOAT7
1169.64	0.956964	0.0605923	15.7935	3.44891e-56	6.24829e-55	ENSG00000035720	STAP1
1107.98	0.495094	0.0313495	15.7927	3.49189e-56	6.31492e-55	ENSG00000094916	CBX5
535.509	-1.13782	0.0720477	-15.7926	3.49747e-56	6.31492e-55	ENSG00000133812	SBF2
741.309	-0.390673	0.0247378	-15.7926	3.49956e-56	6.31492e-55	ENSG00000159348	CYB5R1
297.021	-1.26855	0.0803273	-15.7923	3.51694e-56	6.33791e-55	ENSG00000205730	ITPRIPL2
658.741	-0.586557	0.0371427	-15.792	3.53354e-56	6.35945e-55	ENSG00000196663	TECPR2
1165.93	-0.699828	0.0443211	-15.7899	3.6497e-56	6.55985e-55	ENSG00000173153	ESRRA
175.303	-1.92289	0.121834	-15.7829	4.08088e-56	7.32521e-55	ENSG00000105472	CLEC11A
271.869	-1.18322	0.0749899	-15.7784	4.38233e-56	7.85599e-55	ENSG00000160746	ANO10
1358.84	-1.84923	0.117263	-15.7698	5.01771e-56	8.97349e-55	ENSG00000105520	PLPPR2
317.365	-1.13018	0.0716673	-15.7698	5.01885e-56	8.97349e-55	ENSG00000134802	SLC43A3
586.426	-0.534711	0.033914	-15.7667	5.27263e-56	9.41492e-55	ENSG00000177125	ZBTB34
1019.48	0.341366	0.0216522	15.7659	5.34113e-56	9.52478e-55	ENSG00000151092	NGLY1
2242.74	-0.624742	0.0396484	-15.757	6.14443e-56	1.0943e-54	ENSG00000163349	HIPK1
408.139	0.434343	0.0275678	15.7555	6.29965e-56	1.12048e-54	ENSG00000160818	GPATCH4
334.976	-1.15448	0.0732818	-15.754	6.44573e-56	1.14498e-54	ENSG00000172830	SSH3
706.495	0.914899	0.0580793	15.7526	6.59348e-56	1.1697e-54	ENSG00000145911	N4BP3
2248.15	-1.26858	0.0805415	-15.7507	6.79368e-56	1.20365e-54	ENSG00000149269	PAK1
2071.96	-1.44813	0.0919572	-15.7479	7.10254e-56	1.25675e-54	ENSG00000179820	MYADM
668.737	0.632298	0.0401616	15.7438	7.57003e-56	1.33773e-54	ENSG00000114423	CBLB
5770.5	-2.04269	0.129824	-15.7343	8.80423e-56	1.55382e-54	ENSG00000018280	SLC11A1
67.4414	0.870348	0.055329	15.7304	9.35711e-56	1.64927e-54	ENSG00000128581	IFT22
807.602	-1.36243	0.0866218	-15.7285	9.6482e-56	1.69838e-54	ENSG00000073910	FRY
1014.97	-0.501169	0.0318729	-15.724	1.03561e-55	1.82065e-54	ENSG00000134108	ARL8B
5311.88	0.619932	0.0394323	15.7214	1.07851e-55	1.89364e-54	ENSG00000169499	PLEKHA2
7706.11	-0.842437	0.0536066	-15.7152	1.1906e-55	2.08775e-54	ENSG00000131446	MGAT1
5106.3	-1.66914	0.106213	-15.715	1.1929e-55	2.08911e-54	ENSG00000007237	GAS7
11071.3	-1.37068	0.0872304	-15.7133	1.22664e-55	2.14543e-54	ENSG00000164733	CTSB
611.987	-1.56597	0.0996639	-15.7125	1.24102e-55	2.16782e-54	ENSG00000168615	ADAM9
362.087	-0.808959	0.0514861	-15.7122	1.24839e-55	2.17791e-54	ENSG00000197860	SGTB
1269.27	-0.798881	0.0508672	-15.7052	1.39297e-55	2.42704e-54	ENSG00000198561	CTNND1
2580.73	-0.431706	0.0274929	-15.7025	1.4551e-55	2.53205e-54	ENSG00000108883	EFTUD2
814.239	-1.955	0.124518	-15.7006	1.49855e-55	2.60434e-54	ENSG00000184232	OAF
588.238	-0.414033	0.0263734	-15.6989	1.53965e-55	2.67238e-54	ENSG00000147475	ERLIN2
1678.37	-1.35703	0.086446	-15.698	1.56202e-55	2.70777e-54	ENSG00000108582	CPD
3850.23	-0.981534	0.0625428	-15.6938	1.66814e-55	2.88806e-54	ENSG00000164111	ANXA5
3101.47	-0.853221	0.0543746	-15.6915	1.72842e-55	2.98864e-54	ENSG00000177105	RHOG
288.511	-1.30405	0.0831182	-15.6891	1.79585e-55	3.10131e-54	ENSG00000011198	ABHD5
3316.81	-0.615364	0.0392258	-15.6877	1.83465e-55	3.16431e-54	ENSG00000135956	TMEM127
571.226	-1.34613	0.0858133	-15.6868	1.86333e-55	3.20635e-54	ENSG00000150054	MPP7
3756.03	-0.805995	0.0513807	-15.6867	1.86372e-55	3.20635e-54	ENSG00000111252	SH2B3
1444.58	-0.554539	0.0353608	-15.6823	1.99799e-55	3.43302e-54	ENSG00000138069	RAB1A
4052.61	-1.4468	0.0922877	-15.677	2.17148e-55	3.72644e-54	ENSG00000113269	RNF130
992.289	-1.27537	0.0813534	-15.6769	2.17585e-55	3.72925e-54	ENSG00000005238	FAM214B
1865.24	-1.48703	0.0948836	-15.6722	2.34433e-55	4.01298e-54	ENSG00000145819	ARHGAP26
219.23	-1.56924	0.100148	-15.6692	2.45728e-55	4.20106e-54	ENSG00000139117	CPNE8
305.814	-1.16947	0.0746622	-15.6634	2.69026e-55	4.59362e-54	ENSG00000142733	MAP3K6
289.191	-0.889435	0.0567846	-15.6633	2.69523e-55	4.59636e-54	ENSG00000173085	COQ2
7553.09	-1.34162	0.0856646	-15.6613	2.78287e-55	4.7399e-54	ENSG00000140678	ITGAX
5533.47	-1.49202	0.0952798	-15.6594	2.868e-55	4.87882e-54	ENSG00000106780	MEGF9
614.735	0.968389	0.0618468	15.6579	2.93535e-55	4.98717e-54	ENSG00000172575	RASGRP1
705.202	-0.712849	0.0455316	-15.6561	3.0168e-55	5.11919e-54	ENSG00000162976	SLC66A3
434.927	0.911842	0.0582556	15.6524	3.19762e-55	5.4193e-54	ENSG00000117090	SLAMF1
406.77	-2.1115	0.134945	-15.6471	3.47616e-55	5.88406e-54	ENSG00000160111	CPAMD8
3370.74	-0.715203	0.0457163	-15.6444	3.62947e-55	6.13597e-54	ENSG00000184014	DENND5A
534.77	-0.948148	0.0606099	-15.6434	3.68287e-55	6.21854e-54	ENSG00000185482	STAC3
210.743	-2.07232	0.132474	-15.6433	3.69289e-55	6.22776e-54	ENSG00000176170	SPHK1
1257.22	-0.359964	0.0230229	-15.635	4.20181e-55	7.07728e-54	ENSG00000008294	SPAG9
420.815	0.615066	0.0393403	15.6345	4.23612e-55	7.12628e-54	ENSG00000056972	TRAF3IP2
3044.69	-0.797858	0.0510333	-15.6341	4.26582e-55	7.16742e-54	ENSG00000171206	TRIM8
2567.77	-0.910071	0.0582274	-15.6296	4.57629e-55	7.67963e-54	ENSG00000135404	CD63
492.092	-1.38447	0.0885924	-15.6274	4.73521e-55	7.93656e-54	ENSG00000106952	TNFSF8
3451.19	-1.55808	0.0997211	-15.6244	4.96878e-55	8.31784e-54	ENSG00000182511	FES
7088.01	0.678221	0.0434098	15.6237	5.02329e-55	8.39879e-54	ENSG00000071564	TCF3
112.109	-1.43027	0.0915455	-15.6236	5.02992e-55	8.39959e-54	ENSG00000182557	SPNS3
192.753	0.710003	0.045445	15.6233	5.04922e-55	8.42153e-54	ENSG00000120158	RCL1
2093.09	-0.33582	0.021498	-15.621	5.23907e-55	8.72752e-54	ENSG00000183258	DDX41
419.812	-2.02772	0.129814	-15.6202	5.30255e-55	8.82251e-54	ENSG00000112715	VEGFA
1117.99	0.436397	0.0279389	15.6197	5.34687e-55	8.88544e-54	ENSG00000015171	ZMYND11
2330.14	-0.723532	0.0463478	-15.6109	6.13483e-55	1.01825e-53	ENSG00000115762	PLEKHB2
1035.97	-1.52096	0.0974611	-15.6058	6.6482e-55	1.10212e-53	ENSG00000095383	TBC1D2
349.992	1.0332	0.0662178	15.603	6.94463e-55	1.14986e-53	ENSG00000162373	BEND5
136.446	0.643546	0.0412461	15.6026	6.98779e-55	1.15561e-53	ENSG00000131437	KIF3A
1158.04	-0.965551	0.0618939	-15.6001	7.26711e-55	1.20035e-53	ENSG00000173221	GLRX
2530.58	-0.440821	0.0282579	-15.5999	7.28622e-55	1.20205e-53	ENSG00000136436	CALCOCO2
13826.6	-1.47474	0.0945566	-15.5964	7.70644e-55	1.26984e-53	ENSG00000107738	VSIR
178.162	0.708273	0.0454482	15.5842	9.32776e-55	1.53515e-53	ENSG00000204116	CHIC1
1320.67	-0.990207	0.0635406	-15.5839	9.37215e-55	1.5406e-53	ENSG00000138760	SCARB2
200.893	-1.48918	0.0955859	-15.5795	1.0028e-54	1.64642e-53	ENSG00000064763	FAR2
1674.51	-0.934082	0.0599905	-15.5705	1.15508e-54	1.89416e-53	ENSG00000187446	CHP1
635.919	-0.6899	0.044309	-15.5702	1.16064e-54	1.90101e-53	ENSG00000176871	WSB2
169.006	-1.10474	0.0709738	-15.5654	1.24993e-54	2.04479e-53	ENSG00000148450	MSRB2
1478.8	-0.467472	0.0300376	-15.5629	1.30103e-54	2.12585e-53	ENSG00000144589	STK11IP
105.155	-2.09476	0.134606	-15.5621	1.31606e-54	2.14783e-53	ENSG00000140939	NOL3
2970.87	-1.41894	0.0911843	-15.5612	1.33506e-54	2.17624e-53	ENSG00000198951	NAGA
434.732	-0.503047	0.0323337	-15.558	1.40406e-54	2.28599e-53	ENSG00000141971	MVB12A
604.758	0.996869	0.0640752	15.5578	1.40837e-54	2.29028e-53	ENSG00000185436	IFNLR1
531.65	0.823913	0.0529598	15.5573	1.41909e-54	2.30496e-53	ENSG00000152784	PRDM8
1290.22	-0.371464	0.0238789	-15.5561	1.44558e-54	2.3452e-53	ENSG00000137207	YIPF3
128.052	0.877051	0.0563841	15.5549	1.47313e-54	2.38706e-53	ENSG00000006555	TTC22
1480.29	-1.10992	0.0713794	-15.5496	1.60195e-54	2.59273e-53	ENSG00000147894	C9orf72
554.053	-0.404624	0.0260272	-15.5462	1.68756e-54	2.72806e-53	ENSG00000114026	OGG1
3156.88	-0.946544	0.0608925	-15.5445	1.73346e-54	2.79894e-53	ENSG00000073921	PICALM
38.4448	-1.39153	0.0895269	-15.5432	1.76981e-54	2.85426e-53	ENSG00000162599	NFIA
1373.82	0.764154	0.0491796	15.538	1.91763e-54	3.08902e-53	ENSG00000178199	ZC3H12D
542.684	-0.363036	0.023367	-15.5363	1.97066e-54	3.1707e-53	ENSG00000213246	SUPT4H1
40.1139	-1.21839	0.0784237	-15.536	1.9793e-54	3.18086e-53	ENSG00000185100	ADSS1
1816.92	-0.746481	0.0480514	-15.5351	2.00852e-54	3.22401e-53	ENSG00000181467	RAP2B
2348.29	0.3941	0.02537	15.5341	2.03839e-54	3.26813e-53	ENSG00000169375	SIN3A
690.303	0.506797	0.0326249	15.534	2.04127e-54	3.2689e-53	ENSG00000135439	AGAP2
370.462	-0.517351	0.0333088	-15.532	2.10828e-54	3.37226e-53	ENSG00000196505	GDAP2
1416	0.817823	0.0526573	15.531	2.13868e-54	3.41688e-53	ENSG00000187912	CLEC17A
194.822	0.545994	0.0351575	15.5299	2.17634e-54	3.47299e-53	ENSG00000139675	HNRNPA1L2
196.099	-1.79291	0.115455	-15.5291	2.20432e-54	3.51353e-53	ENSG00000091262	ABCC6
787.934	1.02123	0.0657669	15.528	2.24164e-54	3.56886e-53	ENSG00000164330	EBF1
433.23	-1.09701	0.0706906	-15.5185	2.60043e-54	4.13526e-53	ENSG00000272933	TRIM8-DT
1097.48	-0.468685	0.0302132	-15.5126	2.85054e-54	4.52772e-53	ENSG00000116977	LGALS8
6468.75	-0.454889	0.029329	-15.5099	2.97292e-54	4.71662e-53	ENSG00000114867	EIF4G1
299.792	-1.56291	0.10077	-15.5097	2.98377e-54	4.72833e-53	ENSG00000175866	BAIAP2
642.464	-0.853418	0.0550492	-15.5028	3.31926e-54	5.2539e-53	ENSG00000139946	PELI2
891.493	-0.413923	0.0267016	-15.5018	3.37352e-54	5.3336e-53	ENSG00000012061	ERCC1
655.003	-0.381148	0.024588	-15.5014	3.39575e-54	5.36253e-53	ENSG00000136631	VPS45
46.346	0.977003	0.063028	15.5011	3.41051e-54	5.37962e-53	ENSG00000146243	IRAK1BP1
1501.16	-1.87318	0.120847	-15.5004	3.44835e-54	5.43304e-53	ENSG00000184584	STING1
213.021	-1.23169	0.0794656	-15.4997	3.48653e-54	5.48687e-53	ENSG00000070404	FSTL3
128.957	-1.08874	0.0702558	-15.4967	3.64895e-54	5.73586e-53	ENSG00000068001	HYAL2
504.539	0.363979	0.023491	15.4944	3.78578e-54	5.9441e-53	ENSG00000156531	PHF6
1090.15	-0.664299	0.0428833	-15.4909	3.99817e-54	6.27038e-53	ENSG00000006007	GDE1
434.858	0.556179	0.0359101	15.4881	4.17333e-54	6.53758e-53	ENSG00000148019	CEP78
368.584	-0.658664	0.0425303	-15.487	4.24948e-54	6.64924e-53	ENSG00000159200	RCAN1
1500.79	-0.972248	0.0627937	-15.4832	4.50514e-54	7.04121e-53	ENSG00000069974	RAB27A
1077.36	0.706437	0.0456365	15.4796	4.762e-54	7.43416e-53	ENSG00000072694	FCGR2B
1537.25	-1.7037	0.110069	-15.4785	4.84866e-54	7.56081e-53	ENSG00000143162	CREG1
337.266	-0.568144	0.0367067	-15.4779	4.88843e-54	7.61117e-53	ENSG00000122971	ACADS
1056.14	-0.294522	0.0190286	-15.4779	4.8921e-54	7.61117e-53	ENSG00000126216	TUBGCP3
397.161	0.968494	0.0625953	15.4723	5.33616e-54	8.29259e-53	ENSG00000166086	JAM3
242.504	-0.990908	0.0640453	-15.472	5.3629e-54	8.32468e-53	ENSG00000008441	NFIX
814.422	-0.478415	0.0309216	-15.4719	5.37233e-54	8.32986e-53	ENSG00000117758	STX12
6962.87	-0.876156	0.056633	-15.4708	5.46404e-54	8.46244e-53	ENSG00000123146	ADGRE5
86.1721	-0.688715	0.044535	-15.4646	6.0142e-54	9.30396e-53	ENSG00000148459	PDSS1
344.569	-0.942152	0.0609471	-15.4585	6.61098e-54	1.02156e-52	ENSG00000196814	MVB12B
298.982	-0.660101	0.0427055	-15.4571	6.76131e-54	1.04361e-52	ENSG00000140948	ZCCHC14
3464.31	0.336249	0.0217557	15.4557	6.90856e-54	1.06513e-52	ENSG00000140750	ARHGAP17
987.025	-1.56289	0.101131	-15.454	7.08822e-54	1.0916e-52	ENSG00000147394	ZNF185
3530.26	0.493984	0.0319698	15.4516	7.36136e-54	1.13239e-52	ENSG00000205581	HMGN1
57.0152	-1.30832	0.0847292	-15.4413	8.64054e-54	1.32767e-52	ENSG00000130270	ATP8B3
805.985	-0.609569	0.0394968	-15.4334	9.76313e-54	1.49848e-52	ENSG00000126858	RHOT1
2265.24	0.862248	0.0558755	15.4316	1.0037e-53	1.53878e-52	ENSG00000136997	MYC
132.332	-1.13227	0.0733786	-15.4305	1.02105e-53	1.56362e-52	ENSG00000165804	ZNF219
655.056	-0.81235	0.0526494	-15.4294	1.03783e-53	1.58754e-52	ENSG00000144455	SUMF1
1739.18	-1.21339	0.0786553	-15.4267	1.08229e-53	1.65371e-52	ENSG00000135363	LMO2
1210.5	-1.60993	0.104363	-15.4262	1.09184e-53	1.66642e-52	ENSG00000090013	BLVRB
115.69	0.798228	0.0517524	15.424	1.1294e-53	1.72183e-52	ENSG00000110318	CEP126
572.016	-0.690929	0.0447984	-15.4231	1.14549e-53	1.74442e-52	ENSG00000124098	FAM210B
4794.37	-1.03131	0.0668739	-15.4217	1.1702e-53	1.78006e-52	ENSG00000177156	TALDO1
528.002	-0.571241	0.0370444	-15.4205	1.19269e-53	1.81225e-52	ENSG00000141349	G6PC3
3383.16	0.384868	0.0249589	15.4201	1.19943e-53	1.82046e-52	ENSG00000159023	EPB41
160.456	-1.49139	0.0967192	-15.4198	1.20513e-53	1.82709e-52	ENSG00000165457	FOLR2
1085.37	-0.63547	0.0412257	-15.4144	1.30983e-53	1.98363e-52	ENSG00000105438	KDELR1
390.657	-1.17787	0.0764169	-15.4137	1.32333e-53	2.00185e-52	ENSG00000182197	EXT1
197.535	-0.718924	0.0466424	-15.4135	1.3279e-53	2.00653e-52	ENSG00000109016	DHRS7B
7145.07	0.510917	0.0331488	15.4128	1.34214e-53	2.02582e-52	ENSG00000160991	ORAI2
2387.65	0.344237	0.0223367	15.4113	1.37432e-53	2.07209e-52	ENSG00000135686	KLHL36
1345.61	0.511985	0.0332307	15.407	1.46887e-53	2.2122e-52	ENSG00000197879	MYO1C
117.702	0.44557	0.0289219	15.406	1.49231e-53	2.24504e-52	ENSG00000034693	PEX3
4685.83	-0.418167	0.0271491	-15.4026	1.57183e-53	2.36207e-52	ENSG00000162231	NXF1
1514.83	0.492842	0.0320019	15.4004	1.62684e-53	2.44205e-52	ENSG00000084774	CAD
309.634	0.843114	0.0547492	15.3996	1.64716e-53	2.46983e-52	ENSG00000124374	PAIP2B
1937.28	0.574058	0.0372799	15.3986	1.67207e-53	2.50443e-52	ENSG00000186063	AIDA
487.387	-0.746518	0.0484895	-15.3955	1.75581e-53	2.62698e-52	ENSG00000151466	SCLT1
1785.11	-0.724702	0.0470819	-15.3924	1.84179e-53	2.75261e-52	ENSG00000105355	PLIN3
1848.26	-0.308322	0.0200317	-15.3917	1.86042e-53	2.77741e-52	ENSG00000214655	ZSWIM8
2205.3	0.983346	0.0639097	15.3865	2.01699e-53	3.00787e-52	ENSG00000126353	CCR7
788.611	-0.982848	0.0638802	-15.3858	2.03823e-53	3.03623e-52	ENSG00000183401	CCDC159
897.775	-1.09818	0.0713921	-15.3824	2.14747e-53	3.19547e-52	ENSG00000106868	SUSD1
258.847	0.591499	0.038454	15.382	2.16195e-53	3.21352e-52	ENSG00000147144	CCDC120
3816.32	-1.61132	0.104754	-15.3819	2.16651e-53	3.2168e-52	ENSG00000161642	ZNF385A
1769.1	-1.28945	0.0838312	-15.3815	2.17995e-53	3.23324e-52	ENSG00000092964	DPYSL2
3691.71	-1.19264	0.0775386	-15.3812	2.18838e-53	3.24222e-52	ENSG00000137575	SDCBP
2121.42	-1.16162	0.0755242	-15.3808	2.20301e-53	3.26036e-52	ENSG00000158473	CD1D
71.5074	0.855665	0.0556376	15.3793	2.25499e-53	3.33367e-52	ENSG00000248309	MEF2C-AS1
1535.03	-1.14036	0.0741642	-15.3761	2.3665e-53	3.49474e-52	ENSG00000133612	AGAP3
120.458	0.770831	0.0501356	15.3749	2.41102e-53	3.55664e-52	ENSG00000234171	RNASEH1-DT
118.93	-1.76037	0.114503	-15.374	2.44497e-53	3.60284e-52	ENSG00000197208	SLC22A4
247.558	0.629963	0.0409878	15.3695	2.62034e-53	3.8571e-52	ENSG00000123352	SPATS2
1953.36	-0.278221	0.0181026	-15.3691	2.63862e-53	3.87982e-52	ENSG00000115216	NRBP1
663.619	1.00318	0.0652772	15.368	2.68213e-53	3.93956e-52	ENSG00000133818	RRAS2
237.458	-1.16719	0.0759628	-15.3652	2.8008e-53	4.10945e-52	ENSG00000138640	FAM13A
3245.68	-0.621572	0.0404562	-15.364	2.85213e-53	4.18027e-52	ENSG00000108100	CCNY
687.349	0.738695	0.0480881	15.3613	2.97634e-53	4.35764e-52	ENSG00000206560	ANKRD28
317.11	-0.575446	0.037469	-15.3579	3.13484e-53	4.58479e-52	ENSG00000188493	C19orf54
2610.52	-0.399395	0.0260108	-15.355	3.28141e-53	4.79402e-52	ENSG00000130640	TUBGCP2
53.8515	0.924614	0.060262	15.3432	3.93128e-53	5.73732e-52	ENSG00000109881	CCDC34
1324.24	0.438624	0.0285877	15.3431	3.94009e-53	5.74403e-52	ENSG00000101040	ZMYND8
1654.51	-1.85117	0.120667	-15.3411	4.06079e-53	5.91369e-52	ENSG00000205269	TMEM170B
1119.44	-0.616485	0.0401872	-15.3403	4.11172e-53	5.98149e-52	ENSG00000185000	DGAT1
3545.15	0.344566	0.0224643	15.3383	4.23862e-53	6.15952e-52	ENSG00000173473	SMARCC1
118.449	0.576464	0.0375893	15.3358	4.40583e-53	6.39571e-52	ENSG00000189164	ZNF527
100.753	-1.66644	0.108673	-15.3345	4.49955e-53	6.52483e-52	ENSG00000162174	ASRGL1
3606.61	-1.20331	0.0785243	-15.3241	5.2773e-53	7.64452e-52	ENSG00000114738	MAPKAPK3
50.0249	0.823545	0.0537425	15.3239	5.29558e-53	7.66288e-52	ENSG00000128833	MYO5C
1182.94	-0.647061	0.0422272	-15.3233	5.34125e-53	7.72079e-52	ENSG00000107745	MICU1
4912.76	-1.34845	0.0880048	-15.3225	5.41216e-53	7.81502e-52	ENSG00000135677	GNS
133.664	1.02566	0.0669401	15.3221	5.44574e-53	7.8552e-52	ENSG00000211978	IGHV5-78
86.8156	-1.51078	0.0986069	-15.3212	5.51948e-53	7.95317e-52	ENSG00000092200	RPGRIP1
3521.05	-0.770935	0.0503359	-15.3158	5.99391e-53	8.62769e-52	ENSG00000044115	CTNNA1
2537.67	-1.1434	0.0746712	-15.3125	6.30998e-53	9.07309e-52	ENSG00000145703	IQGAP2
104.65	-1.11802	0.0730441	-15.3061	6.96576e-53	1.00055e-51	ENSG00000146054	TRIM7
733.507	-1.23433	0.0806528	-15.3043	7.16074e-53	1.02748e-51	ENSG00000128487	SPECC1
155.815	-2.13827	0.13972	-15.304	7.18841e-53	1.03036e-51	ENSG00000282572	NA
336.571	-1.34205	0.0876966	-15.3034	7.26021e-53	1.03957e-51	ENSG00000110628	SLC22A18
405.862	-1.0453	0.0683203	-15.3	7.65074e-53	1.09434e-51	ENSG00000123213	NLN
2128.79	-1.27881	0.0835874	-15.2991	7.75702e-53	1.10759e-51	ENSG00000151726	ACSL1
87.977	0.989649	0.064687	15.299	7.7596e-53	1.10759e-51	ENSG00000131941	RHPN2
85.6168	0.68291	0.0446548	15.2931	8.49994e-53	1.212e-51	ENSG00000125841	NRSN2
6721.84	-0.64761	0.042362	-15.2875	9.26166e-53	1.31923e-51	ENSG00000162909	CAPN2
963.535	-0.840337	0.0549774	-15.2851	9.60653e-53	1.36686e-51	ENSG00000103642	LACTB
448.492	0.489029	0.0319939	15.2851	9.61602e-53	1.36686e-51	ENSG00000120800	UTP20
104.903	-1.00233	0.0655777	-15.2846	9.69295e-53	1.37636e-51	ENSG00000171840	NINJ2
1271.52	0.548776	0.0359114	15.2814	1.01775e-52	1.44366e-51	ENSG00000171606	ZNF274
2233.37	-0.962099	0.0629596	-15.2812	1.02046e-52	1.446e-51	ENSG00000027697	IFNGR1
5223.12	-1.31491	0.0860586	-15.2792	1.05148e-52	1.48842e-51	ENSG00000136295	TTYH3
2283.56	-1.77877	0.116446	-15.2754	1.11474e-52	1.57632e-51	ENSG00000111275	ALDH2
231.924	0.874995	0.0573195	15.2652	1.30363e-52	1.84153e-51	ENSG00000154511	DIPK1A
222.811	-0.683335	0.0447684	-15.2638	1.33316e-52	1.88129e-51	ENSG00000151470	C4orf33
4802	-0.41713	0.0273286	-15.2635	1.33835e-52	1.88668e-51	ENSG00000144579	CTDSP1
3496.89	0.368486	0.0241419	15.2634	1.34112e-52	1.88864e-51	ENSG00000162402	USP24
58.7915	0.95993	0.0628914	15.2633	1.34274e-52	1.88897e-51	ENSG00000224875	EML4-AS1
857.513	-1.53841	0.100804	-15.2614	1.38274e-52	1.94324e-51	ENSG00000163412	EIF4E3
433.014	0.920962	0.0603522	15.2598	1.41723e-52	1.98966e-51	ENSG00000132849	PATJ
2318.59	-0.982168	0.0643657	-15.2592	1.43025e-52	2.00588e-51	ENSG00000033327	GAB2
1595.43	-1.18441	0.0776213	-15.2588	1.43843e-52	2.01528e-51	ENSG00000115355	CCDC88A
432.408	-0.772625	0.0506393	-15.2574	1.46953e-52	2.05674e-51	ENSG00000168675	LDLRAD4
809.843	-1.06919	0.0700782	-15.257	1.47797e-52	2.06643e-51	ENSG00000138413	IDH1
2189.38	0.616482	0.0404086	15.2562	1.4966e-52	2.09034e-51	ENSG00000139626	ITGB7
386.149	-1.07882	0.0707441	-15.2496	1.65769e-52	2.31298e-51	ENSG00000141179	PCTP
1009.59	-0.932292	0.0611416	-15.2481	1.6954e-52	2.36318e-51	ENSG00000165672	PRDX3
246.298	-1.0315	0.067649	-15.2478	1.70287e-52	2.37117e-51	ENSG00000138448	ITGAV
169.364	0.547059	0.0358943	15.2408	1.89443e-52	2.63523e-51	ENSG00000083123	BCKDHB
169.018	1.0621	0.069694	15.2395	1.93392e-52	2.68742e-51	ENSG00000151150	ANK3
402.156	-0.533824	0.0350388	-15.2352	2.06466e-52	2.86618e-51	ENSG00000105556	MIER2
445.071	0.997238	0.0654675	15.2326	2.14942e-52	2.98083e-51	ENSG00000088387	DOCK9
1622.58	-0.505904	0.0332179	-15.2298	2.24107e-52	3.10477e-51	ENSG00000060971	ACAA1
274.023	-0.384207	0.0252335	-15.2261	2.37303e-52	3.28425e-51	ENSG00000176148	TCP11L1
633.399	-1.80126	0.118302	-15.2258	2.38245e-52	3.29396e-51	ENSG00000140848	CPNE2
369.421	-1.77406	0.116546	-15.222	2.52501e-52	3.48752e-51	ENSG00000266074	BAHCC1
77.7687	1.05888	0.0695694	15.2205	2.58421e-52	3.56569e-51	ENSG00000198353	HOXC4
316.969	-1.72438	0.113312	-15.218	2.68777e-52	3.70484e-51	ENSG00000130489	NA
206.004	-1.5909	0.10457	-15.2138	2.86518e-52	3.9454e-51	ENSG00000108932	SLC16A6
229.679	-1.19562	0.0786044	-15.2106	3.0092e-52	4.13955e-51	ENSG00000259330	INAFM2
204.432	-0.857956	0.0564109	-15.209	3.08025e-52	4.23302e-51	ENSG00000161955	TNFSF13
2991.06	0.751611	0.0494199	15.2087	3.098e-52	4.25314e-51	ENSG00000096433	ITPR3
2146.97	-0.817999	0.0537862	-15.2083	3.11318e-52	4.26968e-51	ENSG00000131759	RARA
1546.92	0.512642	0.0337142	15.2055	3.2494e-52	4.45204e-51	ENSG00000124406	ATP8A1
445.695	0.703758	0.0462865	15.2044	3.30749e-52	4.5254e-51	ENSG00000078269	SYNJ2
1484.55	-1.03282	0.0679294	-15.2043	3.30957e-52	4.5254e-51	ENSG00000115271	GCA
1018.17	-2.08353	0.137057	-15.2019	3.43496e-52	4.69216e-51	ENSG00000082014	SMARCD3
3268.82	0.558018	0.0367109	15.2003	3.51745e-52	4.80004e-51	ENSG00000154978	VOPP1
202.853	-0.91532	0.0602218	-15.1991	3.58257e-52	4.88403e-51	ENSG00000104205	SGK3
197.803	-0.867587	0.0570904	-15.1967	3.71749e-52	5.0629e-51	ENSG00000175711	B3GNTL1
1214.68	-1.12487	0.0740243	-15.196	3.75983e-52	5.11547e-51	ENSG00000137177	KIF13A
834.118	0.92693	0.060999	15.1958	3.76951e-52	5.12353e-51	ENSG00000075340	ADD2
473.464	1.00997	0.066465	15.1956	3.78395e-52	5.13805e-51	ENSG00000011590	ZBTB32
1848.44	0.772166	0.0508169	15.1951	3.81279e-52	5.17207e-51	ENSG00000158457	TSPAN33
19027	-1.29701	0.0853586	-15.1948	3.82588e-52	5.18468e-51	ENSG00000030582	GRN
1113.93	-0.444948	0.0292863	-15.193	3.93244e-52	5.32379e-51	ENSG00000149932	TMEM219
231.233	-1.62704	0.107103	-15.1914	4.03363e-52	5.45538e-51	ENSG00000167705	RILP
483.95	-1.5856	0.10438	-15.1906	4.08181e-52	5.51509e-51	ENSG00000084110	HAL
969.006	0.498782	0.032841	15.1878	4.2616e-52	5.75232e-51	ENSG00000147224	PRPS1
1560.31	-0.525936	0.0346302	-15.1872	4.29775e-52	5.79538e-51	ENSG00000159128	IFNGR2
825.407	-1.76493	0.116287	-15.1774	4.99516e-52	6.72917e-51	ENSG00000135838	NPL
136.771	-1.01587	0.0669364	-15.1767	5.04602e-52	6.791e-51	ENSG00000129007	CALML4
143.253	-1.67015	0.110058	-15.1752	5.16174e-52	6.93989e-51	ENSG00000044459	CNTLN
439.793	-0.602842	0.0397257	-15.1751	5.1709e-52	6.94538e-51	ENSG00000178585	CTNNBIP1
1528.11	-1.96561	0.129586	-15.1684	5.72765e-52	7.68562e-51	ENSG00000074964	ARHGEF10L
2612.56	-0.52079	0.0343372	-15.1669	5.85563e-52	7.84965e-51	ENSG00000088930	XRN2
1456.1	0.369421	0.0243603	15.1649	6.03726e-52	8.08519e-51	ENSG00000196305	IARS1
53.2086	-1.1785	0.0777236	-15.1627	6.24739e-52	8.3584e-51	ENSG00000178226	PRSS36
185.869	-1.55116	0.10234	-15.157	6.81426e-52	9.10791e-51	ENSG00000171643	S100Z
49.9492	1.04497	0.0689518	15.1551	7.01557e-52	9.36781e-51	ENSG00000198947	DMD
287.097	-0.417424	0.0275455	-15.154	7.13237e-52	9.51446e-51	ENSG00000205423	CNEP1R1
794.68	-1.41354	0.0932798	-15.1538	7.15277e-52	9.53238e-51	ENSG00000141540	TTYH2
256.734	0.380417	0.0251066	15.1521	7.33992e-52	9.77225e-51	ENSG00000188283	ZNF383
147.682	0.753865	0.0497621	15.1494	7.64565e-52	1.01694e-50	ENSG00000161298	ZNF382
263.941	0.76814	0.0507115	15.1472	7.90039e-52	1.0498e-50	ENSG00000232677	LINC00665
1978.29	0.442229	0.0291956	15.1471	7.91665e-52	1.05094e-50	ENSG00000143924	EML4
106.543	-1.46235	0.0965724	-15.1425	8.49137e-52	1.12614e-50	ENSG00000170677	SOCS6
1030.22	-0.383199	0.0253096	-15.1405	8.75889e-52	1.16049e-50	ENSG00000172831	CES2
1266.7	-0.618431	0.0408525	-15.1382	9.07289e-52	1.20093e-50	ENSG00000106397	PLOD3
1053.81	-0.410137	0.0270934	-15.1379	9.10625e-52	1.20418e-50	ENSG00000122390	NAA60
24.4996	-1.68655	0.111466	-15.1306	1.01726e-51	1.34388e-50	ENSG00000225177	NA
100.752	0.980333	0.0647928	15.1303	1.02266e-51	1.34971e-50	ENSG00000211593	IGKJ5
4553.11	-1.7928	0.118558	-15.1216	1.16608e-51	1.53751e-50	ENSG00000196562	SULF2
106.863	0.758374	0.0501608	15.1189	1.21612e-51	1.60194e-50	ENSG00000223891	OSER1-DT
1463.16	-0.536498	0.0354858	-15.1187	1.2197e-51	1.60512e-50	ENSG00000170832	USP32
13955.1	-0.726033	0.0480313	-15.1158	1.27383e-51	1.67474e-50	ENSG00000149925	ALDOA
776.471	-0.781634	0.0517143	-15.1145	1.30013e-51	1.70768e-50	ENSG00000166401	SERPINB8
47.3731	-1.24383	0.0822958	-15.1142	1.30583e-51	1.71351e-50	ENSG00000197712	FAM114A1
2355.91	-0.573323	0.0379397	-15.1114	1.36115e-51	1.78438e-50	ENSG00000134287	ARF3
1847.38	-1.02842	0.0680602	-15.1104	1.38264e-51	1.81082e-50	ENSG00000043462	LCP2
131.277	-2.3147	0.153197	-15.1093	1.40661e-51	1.84045e-50	ENSG00000262370	NA
1325.01	0.380409	0.0251804	15.1073	1.44912e-51	1.89426e-50	ENSG00000030066	NUP160
1854	0.995058	0.065873	15.1057	1.48523e-51	1.9396e-50	ENSG00000137502	RAB30
604.93	-1.47963	0.0979645	-15.1038	1.52918e-51	1.99509e-50	ENSG00000090339	ICAM1
3769.91	-1.51727	0.100477	-15.1006	1.6042e-51	2.09097e-50	ENSG00000117984	CTSD
854.344	-0.48762	0.0323037	-15.0949	1.74961e-51	2.27833e-50	ENSG00000093167	LRRFIP2
1710.59	0.822296	0.0544929	15.09	1.88514e-51	2.45247e-50	ENSG00000167984	NLRC3
116.453	0.818371	0.0542364	15.089	1.91453e-51	2.48834e-50	ENSG00000149582	TMEM25
1246.66	1.00524	0.066644	15.0838	2.06994e-51	2.68777e-50	ENSG00000211772	TRBC2
8832.15	-0.914104	0.0606044	-15.0831	2.09119e-51	2.71279e-50	ENSG00000110719	TCIRG1
42.8695	-1.52835	0.101332	-15.0827	2.10557e-51	2.72885e-50	ENSG00000258130	NA
234.771	-0.836847	0.0554906	-15.0809	2.16402e-51	2.80195e-50	ENSG00000174749	FAM241A
30.5145	-1.36077	0.0902337	-15.0805	2.17753e-51	2.81677e-50	ENSG00000003147	ICA1
32319.1	-0.618858	0.0410412	-15.0789	2.22797e-51	2.87929e-50	ENSG00000136167	LCP1
205.013	0.574336	0.0380967	15.0757	2.33916e-51	3.02012e-50	ENSG00000181450	ZNF678
526.137	-0.766738	0.0508622	-15.0748	2.37161e-51	3.05913e-50	ENSG00000133195	SLC39A11
5034.47	-0.693211	0.0459951	-15.0714	2.49671e-51	3.21746e-50	ENSG00000173327	MAP3K11
87.1928	-0.990315	0.0657098	-15.071	2.51109e-51	3.23293e-50	ENSG00000265298	NA
273.236	-0.904753	0.0600362	-15.0701	2.5463e-51	3.27518e-50	ENSG00000010704	HFE
350.624	-1.13616	0.0753934	-15.0698	2.55986e-51	3.28953e-50	ENSG00000136048	DRAM1
1694.15	-0.411921	0.0273353	-15.0692	2.58239e-51	3.31536e-50	ENSG00000113163	CERT1
259.987	-0.470123	0.0311978	-15.0691	2.58724e-51	3.31847e-50	ENSG00000188315	C3orf62
55.2052	-0.859075	0.0570199	-15.0662	2.70081e-51	3.46089e-50	ENSG00000238197	PAXBP1-AS1
222.973	-1.00805	0.0669284	-15.0617	2.89422e-51	3.70526e-50	ENSG00000172123	SLFN12
6343.77	0.873695	0.0580161	15.0595	2.98846e-51	3.82231e-50	ENSG00000023445	BIRC3
202.962	0.495592	0.0329132	15.0575	3.08002e-51	3.93574e-50	ENSG00000214300	SPDYE3
102.495	-1.73422	0.115182	-15.0563	3.13745e-51	4.00538e-50	ENSG00000186187	ZNRF1
629.142	-1.3389	0.0889349	-15.0548	3.20863e-51	4.09243e-50	ENSG00000075420	FNDC3B
2596.4	0.872612	0.0579682	15.0533	3.2844e-51	4.18516e-50	ENSG00000144218	AFF3
198.394	-2.51689	0.167261	-15.0477	3.57485e-51	4.55103e-50	ENSG00000143847	PPFIA4
91.5751	0.707828	0.0470457	15.0456	3.69231e-51	4.69618e-50	ENSG00000259976	NA
821.067	0.379935	0.0252525	15.0455	3.6966e-51	4.69726e-50	ENSG00000100714	MTHFD1
4284.62	-0.515511	0.034265	-15.0448	3.7342e-51	4.74063e-50	ENSG00000032444	PNPLA6
467.565	-0.982914	0.0653371	-15.0438	3.79432e-51	4.81249e-50	ENSG00000013583	HEBP1
2865.93	-0.568981	0.0378232	-15.0432	3.82811e-51	4.85083e-50	ENSG00000136238	RAC1
2791.45	0.450642	0.0299593	15.0418	3.90907e-51	4.94883e-50	ENSG00000099956	SMARCB1
153.109	-0.962035	0.063964	-15.0403	4.00005e-51	5.05932e-50	ENSG00000143412	ANXA9
218.369	-0.68142	0.0453144	-15.0376	4.16366e-51	5.26138e-50	ENSG00000182749	PAQR7
697.176	-0.722217	0.0480314	-15.0364	4.24293e-51	5.3566e-50	ENSG00000197063	MAFG
237.728	-1.77197	0.117874	-15.0328	4.47992e-51	5.65058e-50	ENSG00000119686	FLVCR2
5467.53	-0.960005	0.0638634	-15.0322	4.51947e-51	5.6952e-50	ENSG00000233276	GPX1
1563.42	-0.505999	0.0336646	-15.0306	4.62902e-51	5.82787e-50	ENSG00000143641	GALNT2
819.895	-0.893232	0.0594317	-15.0296	4.70117e-51	5.91325e-50	ENSG00000204397	CARD16
272.715	0.595499	0.0396258	15.028	4.80984e-51	6.04438e-50	ENSG00000264247	ZNF407-AS1
421.918	0.541811	0.0360637	15.0237	5.13459e-51	6.44655e-50	ENSG00000117009	KMO
931.829	-0.689652	0.0459176	-15.0193	5.4846e-51	6.87967e-50	ENSG00000168214	RBPJ
582.584	-0.434755	0.0289502	-15.0174	5.65126e-51	7.08222e-50	ENSG00000143952	VPS54
150.414	0.743341	0.0495213	15.0105	6.26578e-51	7.84514e-50	ENSG00000102984	ZNF821
2022.49	-0.222615	0.0148345	-15.0066	6.65048e-51	8.31919e-50	ENSG00000101365	IDH3B
310.368	-1.8822	0.125439	-15.0049	6.8193e-51	8.52257e-50	ENSG00000272821	NA
164.352	0.446194	0.0297371	15.0047	6.84509e-51	8.54698e-50	ENSG00000267787	NA
669.499	-0.945788	0.0630562	-14.9991	7.43965e-51	9.28088e-50	ENSG00000072401	UBE2D1
1381.75	-0.614159	0.0409485	-14.9983	7.53113e-51	9.38643e-50	ENSG00000101986	ABCD1
284.809	0.831498	0.0554583	14.9932	8.13363e-51	1.01281e-49	ENSG00000151135	TMEM263
635.139	-1.11604	0.0744595	-14.9886	8.71502e-51	1.08422e-49	ENSG00000179163	FUCA1
525.868	-0.940475	0.0627503	-14.9876	8.85169e-51	1.10022e-49	ENSG00000184060	ADAP2
380.062	-0.665911	0.0444387	-14.9849	9.21225e-51	1.14399e-49	ENSG00000161677	JOSD2
7838.69	-0.934909	0.0623939	-14.984	9.34469e-51	1.15939e-49	ENSG00000266412	NCOA4
349.345	-0.599333	0.0399989	-14.9838	9.37638e-51	1.16226e-49	ENSG00000168890	TMEM150A
130.17	-2.32818	0.155415	-14.9804	9.86053e-51	1.22117e-49	ENSG00000188282	RUFY4
140.55	0.585684	0.0390976	14.98	9.9185e-51	1.22723e-49	ENSG00000198056	PRIM1
8700.02	-1.72678	0.115278	-14.9792	1.0038e-50	1.2409e-49	ENSG00000116701	NCF2
215.153	1.01822	0.067977	14.9788	1.00979e-50	1.24718e-49	ENSG00000133134	BEX2
20808.7	-1.14312	0.0763313	-14.9758	1.05749e-50	1.30491e-49	ENSG00000197629	MPEG1
884.009	-0.457365	0.0305444	-14.9738	1.08989e-50	1.34368e-49	ENSG00000007047	MARK4
114.247	-1.32	0.0881986	-14.9662	1.22103e-50	1.50348e-49	ENSG00000232533	NA
1506.15	0.842446	0.05629	14.9662	1.22171e-50	1.50348e-49	ENSG00000075275	CELSR1
524.089	-0.657956	0.0439678	-14.9645	1.25272e-50	1.54025e-49	ENSG00000109133	TMEM33
464.767	1.01673	0.0679469	14.9637	1.26841e-50	1.55814e-49	ENSG00000169116	PARM1
105.199	-1.66229	0.111096	-14.9626	1.28889e-50	1.58187e-49	ENSG00000225422	RBMS1P1
45.8469	0.729517	0.0487578	14.9621	1.29915e-50	1.59303e-49	ENSG00000198513	ATL1
226.673	0.753846	0.05039	14.9602	1.33582e-50	1.63653e-49	ENSG00000256229	ZNF486
573.55	0.667119	0.0446117	14.9539	1.46894e-50	1.798e-49	ENSG00000243811	APOBEC3D
239.644	0.871635	0.0583106	14.9481	1.60201e-50	1.95912e-49	ENSG00000167775	CD320
2000.93	-1.95412	0.130746	-14.9459	1.65518e-50	2.02234e-49	ENSG00000137462	TLR2
350.728	-0.72943	0.0488065	-14.9454	1.67004e-50	2.03867e-49	ENSG00000171055	FEZ2
366.302	-0.813634	0.0544534	-14.9418	1.76082e-50	2.14757e-49	ENSG00000134575	ACP2
4425.24	-0.980645	0.0656486	-14.9378	1.87085e-50	2.27973e-49	ENSG00000188906	LRRK2
72.8415	-1.11423	0.074597	-14.9366	1.90323e-50	2.31712e-49	ENSG00000183935	HTR7P1
1396.64	-1.50661	0.100869	-14.9363	1.91377e-50	2.32788e-49	ENSG00000106546	AHR
2185.23	-0.638746	0.042768	-14.9351	1.94685e-50	2.36601e-49	ENSG00000112062	MAPK14
67.0097	0.989649	0.0662706	14.9335	1.99599e-50	2.42358e-49	ENSG00000136014	USP44
1399.36	0.533606	0.0357441	14.9285	2.14962e-50	2.6078e-49	ENSG00000263465	SRSF8
117.271	-1.7326	0.116065	-14.9278	2.17282e-50	2.63361e-49	ENSG00000168528	SERINC2
167.928	-0.917065	0.0614363	-14.9271	2.19666e-50	2.66014e-49	ENSG00000115129	TP53I3
593.512	-1.5118	0.101288	-14.9258	2.2402e-50	2.71047e-49	ENSG00000175471	MCTP1
996.009	-0.397821	0.0266537	-14.9256	2.24751e-50	2.7169e-49	ENSG00000103174	NAGPA
994.295	-1.7956	0.120331	-14.9222	2.36363e-50	2.85474e-49	ENSG00000226137	BAIAP2-DT
365.873	-0.373869	0.0250583	-14.92	2.44383e-50	2.949e-49	ENSG00000117640	MTFR1L
532.713	-0.668935	0.0448382	-14.9189	2.48439e-50	2.99368e-49	ENSG00000180773	SLC36A4
355.026	0.756793	0.0507273	14.9188	2.48523e-50	2.99368e-49	ENSG00000137310	TCF19
518.009	-1.14063	0.0764636	-14.9173	2.54287e-50	3.06041e-49	ENSG00000105963	ADAP1
60.379	0.90597	0.0607482	14.9135	2.69195e-50	3.23698e-49	ENSG00000119514	GALNT12
2092.45	-1.62822	0.109219	-14.9078	2.93459e-50	3.52564e-49	ENSG00000090376	IRAK3
82.8609	-1.12553	0.0755162	-14.9044	3.08359e-50	3.70139e-49	ENSG00000134627	PIWIL4
1972.11	-0.352321	0.0236424	-14.9021	3.19353e-50	3.82999e-49	ENSG00000151883	PARP8
1176.72	0.307756	0.0206521	14.9019	3.20381e-50	3.83895e-49	ENSG00000078699	CBFA2T2
411.191	0.476137	0.0319559	14.8998	3.30572e-50	3.95759e-49	ENSG00000159593	NAE1
1385.93	-0.926113	0.0621575	-14.8995	3.32285e-50	3.97462e-49	ENSG00000114573	ATP6V1A
989.834	0.95826	0.0643183	14.8987	3.35894e-50	4.01427e-49	ENSG00000271856	LINC01215
35.1456	0.867512	0.0582313	14.8977	3.41184e-50	4.07393e-49	ENSG00000129810	SGO1
47.5751	0.900045	0.0604299	14.894	3.6037e-50	4.29926e-49	ENSG00000258352	IFITM3P6
2594.5	-1.70963	0.114797	-14.8926	3.67966e-50	4.38605e-49	ENSG00000188641	DPYD
5202.73	-0.683364	0.0458941	-14.89	3.82606e-50	4.55658e-49	ENSG00000121281	ADCY7
325.393	-1.44155	0.0968398	-14.886	4.06601e-50	4.83813e-49	ENSG00000183773	AIFM3
178.096	-0.544633	0.0365907	-14.8845	4.1586e-50	4.94399e-49	ENSG00000158882	TOMM40L
1710.93	-0.502999	0.0338034	-14.8801	4.43672e-50	5.27005e-49	ENSG00000140612	SEC11A
3485.37	-0.701659	0.0471682	-14.8757	4.74322e-50	5.62922e-49	ENSG00000108219	TSPAN14
742.287	-1.10878	0.0745396	-14.8751	4.78355e-50	5.6676e-49	ENSG00000006756	ARSD
559.56	-1.2086	0.0812502	-14.8751	4.78385e-50	5.6676e-49	ENSG00000139132	FGD4
876.242	-0.667413	0.0448695	-14.8745	4.82353e-50	5.70965e-49	ENSG00000230989	HSBP1
1532.28	-0.490963	0.0330106	-14.8729	4.94401e-50	5.8472e-49	ENSG00000171310	CHST11
1771.36	-1.16519	0.0783514	-14.8713	5.06128e-50	5.98071e-49	ENSG00000163171	CDC42EP3
2453.76	-0.978093	0.0657811	-14.8689	5.24676e-50	6.19453e-49	ENSG00000140400	MAN2C1
1776.57	-0.769172	0.0517349	-14.8676	5.35135e-50	6.31255e-49	ENSG00000177119	ANO6
1068.03	-0.543309	0.0365461	-14.8664	5.44507e-50	6.41757e-49	ENSG00000069998	HDHD5
4589.66	-0.47645	0.0320497	-14.866	5.47925e-50	6.45228e-49	ENSG00000185896	LAMP1
728.235	-1.67599	0.112753	-14.8643	5.62285e-50	6.61569e-49	ENSG00000114268	PFKFB4
2292.12	0.418876	0.0281861	14.8611	5.89817e-50	6.93364e-49	ENSG00000165406	MARCHF8
2571.34	-0.514571	0.0346265	-14.8606	5.94037e-50	6.97725e-49	ENSG00000177169	ULK1
1580.36	-0.788404	0.0530715	-14.8555	6.40747e-50	7.51942e-49	ENSG00000176393	RNPEP
1076.36	-1.31414	0.0884692	-14.8542	6.53065e-50	7.65739e-49	ENSG00000163694	RBM47
142.156	-1.86434	0.125549	-14.8495	7.00418e-50	8.20558e-49	ENSG00000085871	MGST2
207.501	0.932514	0.0627991	14.8492	7.04313e-50	8.24414e-49	ENSG00000198910	L1CAM
188.93	-0.791776	0.0533226	-14.8488	7.08398e-50	8.28487e-49	ENSG00000130363	RSPH3
708.662	-2.16582	0.145859	-14.8487	7.09299e-50	8.2883e-49	ENSG00000151650	VENTX
2606.52	-0.455444	0.0306751	-14.8474	7.23435e-50	8.44626e-49	ENSG00000003056	M6PR
83.0389	-1.86055	0.125337	-14.8443	7.57527e-50	8.83673e-49	ENSG00000145428	RNF175
239.237	-1.03286	0.0695799	-14.8442	7.58541e-50	8.84102e-49	ENSG00000186318	BACE1
2401.91	-0.319185	0.0215107	-14.8385	8.26227e-50	9.6217e-49	ENSG00000135365	PHF21A
606.444	-1.86303	0.125566	-14.837	8.43937e-50	9.81957e-49	ENSG00000124313	IQSEC2
68.7798	-1.33049	0.0896839	-14.8353	8.66267e-50	1.00708e-48	ENSG00000151117	TMEM86A
1827.96	-0.486465	0.0328111	-14.8262	9.91311e-50	1.15147e-48	ENSG00000164889	SLC4A2
156.155	-1.51076	0.101911	-14.8243	1.02057e-49	1.18445e-48	ENSG00000162522	KIAA1522
5302.67	-0.755032	0.0509392	-14.8222	1.05238e-49	1.22033e-48	ENSG00000124357	NAGK
1731.63	-0.393111	0.0265322	-14.8164	1.14793e-49	1.33001e-48	ENSG00000051620	HEBP2
222.984	-1.2989	0.0876722	-14.8154	1.16499e-49	1.34862e-48	ENSG00000128311	TST
350.916	-0.784587	0.0529596	-14.8148	1.17499e-49	1.35904e-48	ENSG00000181045	SLC26A11
1021.32	-0.637446	0.0430375	-14.8114	1.23591e-49	1.4283e-48	ENSG00000144136	SLC20A1
752.553	-0.592414	0.0399997	-14.8105	1.25389e-49	1.44786e-48	ENSG00000143622	RIT1
1655.26	-0.842955	0.0569184	-14.8099	1.26443e-49	1.4588e-48	ENSG00000143110	C1orf162
259.386	0.969742	0.0654842	14.8088	1.28536e-49	1.48169e-48	ENSG00000117632	STMN1
2199.74	-0.408755	0.0276039	-14.8079	1.30267e-49	1.50038e-48	ENSG00000175220	ARHGAP1
1357.34	-0.352882	0.0238308	-14.8078	1.30379e-49	1.5004e-48	ENSG00000196998	WDR45
1935.48	-1.83497	0.123921	-14.8076	1.30898e-49	1.50511e-48	ENSG00000148411	NACC2
253.644	0.85862	0.057995	14.8051	1.35852e-49	1.56076e-48	ENSG00000102221	JADE3
550.257	-0.488145	0.0329739	-14.804	1.38083e-49	1.58506e-48	ENSG00000131475	VPS25
1355.6	-1.4604	0.0986514	-14.8036	1.38811e-49	1.59207e-48	ENSG00000198736	MSRB1
4603.14	-0.638196	0.0431163	-14.8017	1.42763e-49	1.63602e-48	ENSG00000142192	APP
377.743	0.484636	0.0327423	14.8015	1.43234e-49	1.64005e-48	ENSG00000168283	BMI1
6332.17	-0.491785	0.0332261	-14.8012	1.43927e-49	1.6466e-48	ENSG00000159314	ARHGAP27
54.0356	-1.90384	0.128632	-14.8007	1.44939e-49	1.6568e-48	ENSG00000237476	LINC01637
872.975	-1.60222	0.108263	-14.7993	1.4801e-49	1.69048e-48	ENSG00000105514	RAB3D
593.071	1.02882	0.06952	14.7989	1.48875e-49	1.69894e-48	ENSG00000166483	WEE1
730.725	-1.38928	0.0938798	-14.7985	1.49788e-49	1.70793e-48	ENSG00000136868	SLC31A1
3751.93	0.457523	0.0309228	14.7956	1.56271e-49	1.78037e-48	ENSG00000163219	ARHGAP25
67170.6	-1.17414	0.0793717	-14.7929	1.62715e-49	1.85224e-48	ENSG00000197746	PSAP
1782.84	-0.694608	0.0469584	-14.792	1.65006e-49	1.87675e-48	ENSG00000127948	POR
3391.52	-0.588637	0.0397946	-14.7919	1.65206e-49	1.87747e-48	ENSG00000110880	CORO1C
285.706	-1.98185	0.133987	-14.7913	1.66627e-49	1.89204e-48	ENSG00000109667	SLC2A9
80.5991	-0.734944	0.0496984	-14.7881	1.74863e-49	1.98391e-48	ENSG00000121039	RDH10
300.892	-1.08761	0.0735804	-14.7813	1.93457e-49	2.19304e-48	ENSG00000110400	NECTIN1
34.0589	-1.17227	0.0793086	-14.7811	1.93875e-49	2.19597e-48	ENSG00000248712	CCDC153
2184.6	-1.88631	0.127637	-14.7787	2.00986e-49	2.27462e-48	ENSG00000139318	DUSP6
6625.52	-1.11784	0.0756806	-14.7705	2.27141e-49	2.56849e-48	ENSG00000130775	THEMIS2
3056.72	-0.866573	0.0586784	-14.7682	2.34969e-49	2.65482e-48	ENSG00000108175	ZMIZ1
4457.01	-0.53514	0.0362381	-14.7674	2.37882e-49	2.68551e-48	ENSG00000075785	RAB7A
42.585	-1.95602	0.132479	-14.7648	2.47032e-49	2.7865e-48	ENSG00000136867	SLC31A2
87.8797	-1.06716	0.072278	-14.7646	2.47713e-49	2.79188e-48	ENSG00000213906	LTB4R2
113.65	0.590056	0.0399704	14.7623	2.56266e-49	2.88589e-48	ENSG00000182134	TDRKH
1204.18	-0.807644	0.0547133	-14.7614	2.59907e-49	2.92293e-48	ENSG00000143376	SNX27
13023.2	-2.42845	0.164514	-14.7614	2.59983e-49	2.92293e-48	ENSG00000185215	TNFAIP2
863.231	0.781071	0.0529184	14.7599	2.65621e-49	2.98387e-48	ENSG00000241106	HLA-DOB
156.938	0.97296	0.0659446	14.7542	2.89093e-49	3.24487e-48	ENSG00000128266	GNAZ
1937.81	0.330044	0.02237	14.7538	2.90628e-49	3.25942e-48	ENSG00000145734	BDP1
248.812	0.469045	0.0317945	14.7524	2.96893e-49	3.32696e-48	ENSG00000101574	METTL4
65.919	0.851648	0.0577424	14.7491	3.11809e-49	3.49124e-48	ENSG00000226979	LTA
471.884	-0.743377	0.0504133	-14.7457	3.28087e-49	3.67049e-48	ENSG00000134030	CTIF
81.2319	0.699584	0.0474542	14.7423	3.44763e-49	3.85389e-48	ENSG00000256223	ZNF10
522.325	0.545111	0.0369766	14.7421	3.46059e-49	3.86522e-48	ENSG00000100592	DAAM1
190.499	-0.537083	0.0364338	-14.7413	3.49827e-49	3.90411e-48	ENSG00000119328	ABITRAM
985.096	0.456391	0.0309639	14.7395	3.59632e-49	4.01026e-48	ENSG00000154122	ANKH
1203.01	0.424238	0.0287893	14.736	3.78718e-49	4.21965e-48	ENSG00000182827	ACBD3
2575.44	0.357945	0.0242921	14.735	3.84066e-49	4.27574e-48	ENSG00000172869	DMXL1
6524.63	-0.568124	0.0385584	-14.7341	3.89377e-49	4.33134e-48	ENSG00000172354	GNB2
788.226	-0.562177	0.0381594	-14.7323	3.99694e-49	4.44249e-48	ENSG00000243646	IL10RB
4137.02	-1.72215	0.11693	-14.728	4.25873e-49	4.72962e-48	ENSG00000184730	APOBR
213.009	-1.85462	0.12596	-14.7239	4.52983e-49	5.0266e-48	ENSG00000178814	OPLAH
373.379	0.827062	0.0561756	14.7228	4.6021e-49	5.10265e-48	ENSG00000268027	NA
7590.31	-1.15633	0.0785418	-14.7225	4.62591e-49	5.12489e-48	ENSG00000101336	HCK
266.509	-1.72904	0.117505	-14.7146	5.19274e-49	5.7482e-48	ENSG00000114853	ZBTB47
4565.34	-1.88857	0.128353	-14.7138	5.2537e-49	5.81097e-48	ENSG00000004399	PLXND1
621.278	-0.724916	0.0492739	-14.712	5.40122e-49	5.96931e-48	ENSG00000169299	PGM2
5075.86	-0.629291	0.0427862	-14.7078	5.74416e-49	6.34318e-48	ENSG00000156515	HK1
604.797	-1.47893	0.100585	-14.7033	6.13685e-49	6.77136e-48	ENSG00000176595	KBTBD11
4290.92	0.568503	0.0386664	14.7028	6.18853e-49	6.82287e-48	ENSG00000150995	ITPR1
958.644	-1.78837	0.121639	-14.7023	6.23286e-49	6.86619e-48	ENSG00000156052	GNAQ
2263.71	0.957254	0.0651113	14.7018	6.27584e-49	6.90798e-48	ENSG00000054654	SYNE2
1531.03	-0.565545	0.0384688	-14.7014	6.31311e-49	6.9434e-48	ENSG00000130724	CHMP2A
1806.93	-0.619637	0.0421496	-14.7009	6.36054e-49	6.98994e-48	ENSG00000071537	SEL1L
68.827	1.15512	0.078584	14.6991	6.5306e-49	7.17106e-48	ENSG00000116147	TNR
340.263	-1.25655	0.0854926	-14.6977	6.66625e-49	7.31413e-48	ENSG00000170396	ZNF804A
3212.31	-0.51534	0.0350788	-14.6909	7.36747e-49	8.07702e-48	ENSG00000153815	CMIP
395.822	-0.441064	0.0300263	-14.6893	7.55288e-49	8.27365e-48	ENSG00000058799	YIPF1
344.994	-1.55596	0.105948	-14.6861	7.9094e-49	8.65724e-48	ENSG00000149485	FADS1
372.797	-0.611667	0.0416499	-14.6859	7.93267e-49	8.67576e-48	ENSG00000095321	CRAT
460.919	0.514674	0.035048	14.6848	8.06587e-49	8.81438e-48	ENSG00000117906	RCN2
357.488	0.437347	0.0297856	14.6832	8.26072e-49	9.0201e-48	ENSG00000164933	SLC25A32
3007.89	-1.55988	0.106248	-14.6816	8.46008e-49	9.2304e-48	ENSG00000059377	TBXAS1
33.8211	-1.71829	0.117051	-14.6799	8.67511e-49	9.45746e-48	ENSG00000176659	LINC02910
450.277	-1.31042	0.0892708	-14.6792	8.76759e-49	9.55066e-48	ENSG00000204839	MROH6
6851.77	0.351018	0.0239195	14.6749	9.33101e-49	1.01563e-47	ENSG00000156976	EIF4A2
369.039	-0.793637	0.0540852	-14.6738	9.48331e-49	1.03139e-47	ENSG00000026652	AGPAT4
238.902	-1.57004	0.107059	-14.6652	1.07678e-48	1.17015e-47	ENSG00000165886	UBTD1
690.242	-0.624543	0.0425957	-14.6621	1.12702e-48	1.22378e-47	ENSG00000147202	DIAPH2
5285.62	-0.757701	0.0516859	-14.6597	1.1678e-48	1.26705e-47	ENSG00000072778	ACADVL
208.798	0.609216	0.0415583	14.6593	1.17431e-48	1.2731e-47	ENSG00000197937	ZNF347
2395.49	0.410427	0.0279998	14.6582	1.19362e-48	1.29301e-47	ENSG00000175931	UBE2O
464.819	0.474746	0.0323997	14.6528	1.29264e-48	1.39917e-47	ENSG00000117597	UTP25
1341.97	-1.94703	0.132884	-14.6521	1.30635e-48	1.41288e-47	ENSG00000143382	ADAMTSL4
933.564	-0.363305	0.0248058	-14.646	1.42963e-48	1.54499e-47	ENSG00000076685	NT5C2
1313.52	-0.814248	0.055597	-14.6455	1.43866e-48	1.55353e-47	ENSG00000197601	FAR1
356.613	-2.01393	0.137519	-14.6447	1.45674e-48	1.57181e-47	ENSG00000121297	TSHZ3
398.03	0.54867	0.0374679	14.6437	1.4775e-48	1.59295e-47	ENSG00000173145	NOC3L
132.538	-0.847278	0.0578612	-14.6433	1.4873e-48	1.60225e-47	ENSG00000104375	STK3
6275.61	-1.4037	0.0959113	-14.6355	1.66859e-48	1.79613e-47	ENSG00000159840	ZYX
356.079	-1.43508	0.0981021	-14.6285	1.84933e-48	1.98912e-47	ENSG00000135678	CPM
369.653	-1.23209	0.084251	-14.624	1.97306e-48	2.12054e-47	ENSG00000178623	GPR35
481.447	0.641944	0.0438986	14.6233	1.99405e-48	2.14141e-47	ENSG00000095002	MSH2
100.451	0.804217	0.0549985	14.6225	2.01822e-48	2.16566e-47	ENSG00000163082	SGPP2
1437.32	-0.478555	0.0327297	-14.6214	2.05003e-48	2.19807e-47	ENSG00000087111	PIGS
1536.98	0.377861	0.0258457	14.6199	2.09758e-48	2.24729e-47	ENSG00000117280	RAB29
739.262	-0.380114	0.0260052	-14.6168	2.19368e-48	2.34841e-47	ENSG00000204673	AKT1S1
39.4154	-1.26451	0.0865351	-14.6127	2.33123e-48	2.4937e-47	ENSG00000070019	GUCY2C
100.739	-0.762238	0.0521655	-14.6119	2.35772e-48	2.52006e-47	ENSG00000163517	HDAC11
3563.91	-1.44864	0.0991434	-14.6116	2.36922e-48	2.53038e-47	ENSG00000147443	DOK2
1660.83	-1.99055	0.136258	-14.6086	2.47386e-48	2.64007e-47	ENSG00000187796	CARD9
58.7686	-1.28795	0.0881751	-14.6067	2.54433e-48	2.71315e-47	ENSG00000048342	CC2D2A
3292.92	-1.90644	0.130568	-14.6011	2.7616e-48	2.94254e-47	ENSG00000169403	PTAFR
46.1501	-1.62819	0.111514	-14.6008	2.77661e-48	2.95624e-47	ENSG00000092051	JPH4
1022.49	-1.14172	0.078201	-14.5998	2.81619e-48	2.99604e-47	ENSG00000188313	PLSCR1
2596.19	-2.18385	0.149609	-14.5971	2.93119e-48	3.11595e-47	ENSG00000107551	RASSF4
1382.81	-0.671099	0.0459758	-14.5968	2.94359e-48	3.12671e-47	ENSG00000144848	ATG3
3040.92	-0.702662	0.0481445	-14.5949	3.02824e-48	3.21413e-47	ENSG00000100596	SPTLC2
167.134	-1.30201	0.0892413	-14.5898	3.26092e-48	3.4584e-47	ENSG00000196123	KIAA0895L
489.306	0.931307	0.0638355	14.5892	3.2923e-48	3.48897e-47	ENSG00000138623	SEMA7A
20869.4	0.495984	0.0339991	14.5881	3.34175e-48	3.53863e-47	ENSG00000168028	RPSA
1183.8	-0.687998	0.0471695	-14.5856	3.46649e-48	3.66788e-47	ENSG00000169692	AGPAT2
166.344	-0.751451	0.0515231	-14.5847	3.51227e-48	3.71343e-47	ENSG00000164010	ERMAP
261.856	-0.880088	0.0603556	-14.5817	3.6725e-48	3.87984e-47	ENSG00000163702	IL17RC
329.746	0.933427	0.0640149	14.5814	3.68828e-48	3.8935e-47	ENSG00000151623	NR3C2
3548.52	0.529145	0.0363018	14.5763	3.97635e-48	4.19436e-47	ENSG00000105287	PRKD2
42.231	-1.30433	0.0894889	-14.5753	4.03537e-48	4.25333e-47	ENSG00000257702	LBX2-AS1
588.079	-1.17162	0.080393	-14.5736	4.13485e-48	4.35483e-47	ENSG00000083290	ULK2
1304.34	0.571391	0.0392098	14.5727	4.1928e-48	4.41245e-47	ENSG00000263264	NA
100.235	0.70355	0.0482831	14.5714	4.27335e-48	4.49376e-47	ENSG00000246582	TNFRSF10A-DT
2131.1	-0.521196	0.0357715	-14.5701	4.3494e-48	4.57021e-47	ENSG00000118640	VAMP8
121.431	0.76951	0.052822	14.568	4.48955e-48	4.71386e-47	ENSG00000153044	CENPH
2760.36	-0.77632	0.0532911	-14.5675	4.51866e-48	4.74078e-47	ENSG00000172725	CORO1B
2771.73	-1.68327	0.115637	-14.5565	5.30856e-48	5.56523e-47	ENSG00000135709	KIAA0513
1189.85	-1.09244	0.075057	-14.5549	5.44047e-48	5.69795e-47	ENSG00000181274	FRAT2
582.109	-0.532279	0.0365707	-14.5548	5.4435e-48	5.69795e-47	ENSG00000110911	SLC11A2
41.1527	-0.996991	0.068501	-14.5544	5.47528e-48	5.72682e-47	ENSG00000166025	AMOTL1
485.82	-0.545552	0.0375001	-14.548	6.01338e-48	6.28484e-47	ENSG00000145545	SRD5A1
716.888	-0.968496	0.066592	-14.5437	6.40008e-48	6.68388e-47	ENSG00000147813	NAPRT
169.205	-2.04006	0.140272	-14.5436	6.4121e-48	6.69131e-47	ENSG00000145936	KCNMB1
9565.14	-0.706568	0.0485837	-14.5433	6.44025e-48	6.71555e-47	ENSG00000026508	CD44
1110.74	-0.43937	0.0302117	-14.5431	6.46243e-48	6.73355e-47	ENSG00000114648	KLHL18
393.77	-1.56733	0.107774	-14.5428	6.48438e-48	6.75127e-47	ENSG00000135077	HAVCR2
1240.95	0.479086	0.0329434	14.5427	6.50041e-48	6.7628e-47	ENSG00000112118	MCM3
1650.53	-0.438522	0.0301553	-14.5421	6.55381e-48	6.81317e-47	ENSG00000161013	MGAT4B
145.406	0.826796	0.0568728	14.5376	6.99664e-48	7.268e-47	ENSG00000228672	PROB1
119.665	-0.752235	0.0517504	-14.5358	7.18222e-48	7.4551e-47	ENSG00000164414	SLC35A1
2051.33	0.450636	0.0310052	14.5342	7.35583e-48	7.62951e-47	ENSG00000029725	RABEP1
363.415	-1.02831	0.0707551	-14.5334	7.44769e-48	7.71893e-47	ENSG00000050344	NFE2L3
675.086	-0.687286	0.047298	-14.531	7.71175e-48	7.98654e-47	ENSG00000187840	EIF4EBP1
241.234	-1.85442	0.127662	-14.526	8.29489e-48	8.58395e-47	ENSG00000241399	CD302
1227.61	-1.12741	0.0776145	-14.5258	8.31837e-48	8.60174e-47	ENSG00000015475	BID
1756.93	-0.387119	0.0266557	-14.523	8.66859e-48	8.95711e-47	ENSG00000180357	ZNF609
7444.71	-0.948615	0.0653298	-14.5204	8.99835e-48	9.29081e-47	ENSG00000168010	ATG16L2
674.52	0.367287	0.0252975	14.5187	9.22512e-48	9.51776e-47	ENSG00000175792	RUVBL1
1188.83	-0.45434	0.0312982	-14.5165	9.52398e-48	9.81869e-47	ENSG00000130560	UBAC1
1015.34	-1.17098	0.0806819	-14.5135	9.95069e-48	1.02509e-46	ENSG00000059728	MXD1
2111.15	1.00606	0.0693384	14.5094	1.05668e-47	1.08773e-46	ENSG00000117394	SLC2A1
2088.63	0.958943	0.0660933	14.5089	1.06381e-47	1.09425e-46	ENSG00000150347	ARID5B
249.436	-1.35121	0.0931461	-14.5064	1.10381e-47	1.13454e-46	ENSG00000165424	ZCCHC24
466.907	0.77108	0.0531551	14.5062	1.10647e-47	1.13641e-46	ENSG00000273472	NA
5714.47	-1.61424	0.111319	-14.5011	1.19283e-47	1.22419e-46	ENSG00000186350	RXRA
424.355	-0.799797	0.0551612	-14.4993	1.22441e-47	1.25566e-46	ENSG00000158769	F11R
1219.42	0.426463	0.029429	14.4912	1.3762e-47	1.41027e-46	ENSG00000107829	FBXW4
917.764	-0.77718	0.0536506	-14.486	1.48652e-47	1.52218e-46	ENSG00000057252	SOAT1
1617.24	0.340146	0.0234822	14.4853	1.50062e-47	1.53546e-46	ENSG00000174197	MGA
396.168	0.767194	0.0529731	14.4827	1.55831e-47	1.5933e-46	ENSG00000104936	DMPK
17488.2	-0.677317	0.0467736	-14.4808	1.60298e-47	1.63775e-46	ENSG00000067225	PKM
173.469	0.467272	0.0322686	14.4807	1.60491e-47	1.6385e-46	ENSG00000119927	GPAM
190.721	0.851814	0.0588261	14.4802	1.61654e-47	1.64913e-46	ENSG00000147180	ZNF711
314.233	0.903583	0.0624017	14.4801	1.61833e-47	1.64973e-46	ENSG00000173926	MARCHF3
197.071	-0.7863	0.0543273	-14.4734	1.7848e-47	1.81807e-46	ENSG00000144283	PKP4
359.48	1.04622	0.0723076	14.469	1.90296e-47	1.93699e-46	ENSG00000168916	ZNF608
2923.9	-0.299135	0.0206748	-14.4686	1.91351e-47	1.94628e-46	ENSG00000099917	MED15
835.556	-0.540421	0.0373521	-14.4683	1.92138e-47	1.95283e-46	ENSG00000090020	SLC9A1
532.324	-2.21674	0.153229	-14.4668	1.96347e-47	1.99413e-46	ENSG00000255587	RAB44
3424.96	-1.75968	0.121657	-14.4643	2.03747e-47	2.06774e-46	ENSG00000075426	FOSL2
2953.4	-0.510367	0.0352851	-14.4641	2.04242e-47	2.07123e-46	ENSG00000129657	SEC14L1
314.53	0.461596	0.0319229	14.4597	2.1771e-47	2.20617e-46	ENSG00000164466	SFXN1
5221	-0.353369	0.0244581	-14.4479	2.58461e-47	2.61718e-46	ENSG00000048828	FAM120A
86.596	-1.37732	0.0953308	-14.4478	2.58892e-47	2.6196e-46	ENSG00000143797	MBOAT2
8178.05	-0.250929	0.0173689	-14.447	2.61938e-47	2.64846e-46	ENSG00000079805	DNM2
108.975	-0.95166	0.065922	-14.4362	3.06485e-47	3.09658e-46	ENSG00000154589	LY96
255.257	0.462502	0.03204	14.4352	3.10927e-47	3.13915e-46	ENSG00000197603	CPLANE1
663.633	-0.48335	0.0334943	-14.4308	3.31064e-47	3.33998e-46	ENSG00000135823	STX6
37.3212	-1.73271	0.120086	-14.429	3.40106e-47	3.42867e-46	ENSG00000152380	FAM151B
2713.41	-0.67941	0.0470926	-14.4271	3.49391e-47	3.51967e-46	ENSG00000117335	CD46
12093.7	-0.544833	0.0377675	-14.426	3.55166e-47	3.57522e-46	ENSG00000101160	CTSZ
65.0837	0.823494	0.0570922	14.4239	3.65966e-47	3.68121e-46	ENSG00000269918	NA
1743.83	-0.803345	0.0557072	-14.4209	3.82558e-47	3.84529e-46	ENSG00000120868	APAF1
2048.18	1.04295	0.0723233	14.4206	3.83838e-47	3.85531e-46	ENSG00000211592	IGKC
121.144	-1.43311	0.0994075	-14.4165	4.07404e-47	4.08901e-46	ENSG00000150782	IL18
197.794	-1.50264	0.104236	-14.4158	4.11344e-47	4.12552e-46	ENSG00000149798	CDC42EP2
3635.19	-0.578606	0.04014	-14.4147	4.1841e-47	4.19331e-46	ENSG00000128604	IRF5
203.553	1.15557	0.0801702	14.4139	4.22916e-47	4.23537e-46	ENSG00000234184	LINC01781
86.1815	0.694557	0.0481868	14.4139	4.23382e-47	4.23692e-46	ENSG00000260686	NA
1715.28	-0.630685	0.0437622	-14.4116	4.37186e-47	4.37186e-46	ENSG00000132359	RAP1GAP2
595.585	-0.656604	0.0455702	-14.4086	4.56648e-47	4.56314e-46	ENSG00000211455	STK38L
160.784	0.67186	0.0466321	14.4077	4.63095e-47	4.62418e-46	ENSG00000072134	EPN2
89.4979	-0.855167	0.0593768	-14.4024	5.00047e-47	4.98952e-46	ENSG00000177096	PHETA2
2021.02	-0.687519	0.0477518	-14.3978	5.34388e-47	5.32828e-46	ENSG00000108953	YWHAE
2303.63	-2.23691	0.155411	-14.3935	5.68394e-47	5.66321e-46	ENSG00000172243	CLEC7A
361.531	-0.870656	0.0604976	-14.3916	5.84408e-47	5.81852e-46	ENSG00000137364	TPMT
359.78	-1.05083	0.0730316	-14.3887	6.08908e-47	6.05804e-46	ENSG00000197852	INKA2
63.303	-1.59106	0.110593	-14.3867	6.2723e-47	6.23578e-46	ENSG00000181908	LINC02724
1811.05	0.327141	0.0227398	14.3863	6.31122e-47	6.26991e-46	ENSG00000178035	IMPDH2
380.698	-0.687515	0.0478043	-14.3819	6.72547e-47	6.6766e-46	ENSG00000165476	REEP3
976.254	-0.751279	0.0522407	-14.3811	6.79963e-47	6.74531e-46	ENSG00000148834	GSTO1
370.259	0.400222	0.0278411	14.3752	7.40184e-47	7.33738e-46	ENSG00000170085	SIMC1
155.368	0.901381	0.0627144	14.3728	7.66796e-47	7.59568e-46	ENSG00000238121	LINC00426
181.887	1.00591	0.0700024	14.3696	8.02851e-47	7.94707e-46	ENSG00000182379	NXPH4
805.568	-1.0208	0.0710413	-14.3691	8.09293e-47	8.00503e-46	ENSG00000140836	ZFHX3
116.519	0.693086	0.0482359	14.3687	8.13785e-47	8.04364e-46	ENSG00000105750	ZNF85
496.032	0.425998	0.029652	14.3666	8.38615e-47	8.28306e-46	ENSG00000166261	ZNF202
1416.25	0.867053	0.0603637	14.3638	8.72895e-47	8.61542e-46	ENSG00000236901	MIR600HG
454.1	-0.567037	0.0394812	-14.3622	8.93726e-47	8.81465e-46	ENSG00000136643	RPS6KC1
180.338	0.890491	0.0620149	14.3593	9.31439e-47	9.17999e-46	ENSG00000021300	PLEKHB1
228.933	-0.956485	0.0666196	-14.3574	9.57315e-47	9.42821e-46	ENSG00000183621	ZNF438
946.479	0.519743	0.0362016	14.3569	9.64192e-47	9.48909e-46	ENSG00000112365	ZBTB24
281.892	0.583291	0.0406381	14.3533	1.01607e-46	9.99249e-46	ENSG00000177721	ANXA2R
64.3236	-1.49143	0.103914	-14.3525	1.028e-46	1.01025e-45	ENSG00000246731	MGC16275
666.652	-1.778	0.123908	-14.3494	1.07489e-46	1.05557e-45	ENSG00000249437	NAIP
74.5424	-1.06028	0.0739498	-14.3378	1.2698e-46	1.24608e-45	ENSG00000134072	CAMK1
912.981	-1.25473	0.0875233	-14.3359	1.30546e-46	1.28016e-45	ENSG00000122223	CD244
3021.48	-0.663299	0.0462714	-14.335	1.32305e-46	1.29648e-45	ENSG00000100605	ITPK1
2443.41	-2.20148	0.153626	-14.3301	1.41908e-46	1.38958e-45	ENSG00000165801	ARHGEF40
533.339	-1.23029	0.0858589	-14.3292	1.43774e-46	1.40685e-45	ENSG00000065989	PDE4A
824.357	-2.95366	0.20613	-14.3291	1.43937e-46	1.40743e-45	ENSG00000226091	LINC00937
408.864	0.666889	0.046547	14.3272	1.47932e-46	1.44546e-45	ENSG00000007129	CEACAM21
390.244	-0.443538	0.0309669	-14.323	1.57263e-46	1.53554e-45	ENSG00000160753	RUSC1
382.365	-0.622436	0.0434645	-14.3206	1.62776e-46	1.58823e-45	ENSG00000101856	PGRMC1
458.681	-0.989466	0.069098	-14.3198	1.64706e-46	1.60591e-45	ENSG00000196372	ASB13
142.09	0.554716	0.0387494	14.3155	1.75184e-46	1.70686e-45	ENSG00000112877	CEP72
2396.23	-0.829909	0.0579769	-14.3145	1.77704e-46	1.73017e-45	ENSG00000131724	IL13RA1
275.636	0.363145	0.0253702	14.3138	1.79379e-46	1.74524e-45	ENSG00000005436	GCFC2
1621.54	-0.647534	0.0452385	-14.3138	1.79508e-46	1.74525e-45	ENSG00000124570	SERPINB6
5371.99	-0.453733	0.0317164	-14.306	2.00827e-46	1.95113e-45	ENSG00000115677	HDLBP
238.849	0.402383	0.0281319	14.3035	2.08212e-46	2.02145e-45	ENSG00000088876	ZNF343
1927.29	-0.45179	0.0315875	-14.3028	2.10182e-46	2.03913e-45	ENSG00000143612	C1orf43
6950.05	-0.827156	0.0578425	-14.3001	2.18362e-46	2.11698e-45	ENSG00000182718	ANXA2
2120.36	-1.01035	0.0706549	-14.2998	2.19424e-46	2.12577e-45	ENSG00000197747	S100A10
599.329	0.453492	0.0317189	14.2972	2.27729e-46	2.20466e-45	ENSG00000162688	AGL
1842.77	0.555586	0.0388661	14.2949	2.35584e-46	2.27909e-45	ENSG00000089220	PEBP1
7587.01	-0.516777	0.0361599	-14.2914	2.47418e-46	2.39188e-45	ENSG00000102144	PGK1
40.378	0.814868	0.0570239	14.2899	2.52863e-46	2.44279e-45	ENSG00000112293	GPLD1
68.0444	-0.873984	0.0611717	-14.2874	2.62289e-46	2.53206e-45	ENSG00000280008	NA
333.755	-0.544361	0.038103	-14.2866	2.65377e-46	2.56007e-45	ENSG00000178307	TMEM11
41.4608	-1.29922	0.0909503	-14.285	2.71473e-46	2.61702e-45	ENSG00000232354	VIPR1-AS1
152.004	0.572284	0.0400758	14.28	2.91463e-46	2.80774e-45	ENSG00000106399	RPA3
454.354	-0.926935	0.0649125	-14.2798	2.92546e-46	2.81619e-45	ENSG00000115295	CLIP4
135.772	-0.866075	0.0606539	-14.279	2.9595e-46	2.84696e-45	ENSG00000132640	BTBD3
4388.37	0.533238	0.0373491	14.2771	3.03812e-46	2.92053e-45	ENSG00000065809	FAM107B
720.467	0.5579	0.0390766	14.2771	3.04159e-46	2.9218e-45	ENSG00000182903	ZNF721
63.9207	-0.926766	0.064918	-14.276	3.0902e-46	2.96642e-45	ENSG00000158887	MPZ
72.2133	0.658471	0.0461304	14.2741	3.17252e-46	3.0433e-45	ENSG00000137269	LRRC1
93.5051	-1.55045	0.108621	-14.2739	3.18347e-46	3.05167e-45	ENSG00000019102	VSIG2
2303.69	-0.756048	0.0529701	-14.2731	3.21905e-46	3.08361e-45	ENSG00000150977	RILPL2
251.829	-1.94126	0.136018	-14.2721	3.26455e-46	3.125e-45	ENSG00000114541	FRMD4B
957.604	-0.41716	0.0292358	-14.2688	3.42438e-46	3.2757e-45	ENSG00000106617	PRKAG2
617.031	0.443582	0.0310881	14.2686	3.43596e-46	3.28448e-45	ENSG00000063587	ZNF275
3108.78	-1.46273	0.102533	-14.2659	3.56936e-46	3.40961e-45	ENSG00000160712	IL6R
557.346	-0.562173	0.0394071	-14.2658	3.57544e-46	3.41303e-45	ENSG00000198792	TMEM184B
142.418	-1.72426	0.120869	-14.2654	3.59268e-46	3.42709e-45	ENSG00000181826	RELL1
3037.65	-0.352774	0.0247325	-14.2636	3.69077e-46	3.51821e-45	ENSG00000147526	TACC1
495.372	0.791055	0.0554659	14.262	3.77519e-46	3.59617e-45	ENSG00000105699	LSR
336.79	-0.864099	0.0605929	-14.2607	3.84434e-46	3.65949e-45	ENSG00000144959	NCEH1
59.638	-1.9239	0.134938	-14.2577	4.01532e-46	3.81959e-45	ENSG00000186047	DLEU7
134.586	0.587991	0.0412417	14.2572	4.04437e-46	3.84454e-45	ENSG00000115109	EPB41L5
1368.52	-0.374418	0.0262667	-14.2545	4.20272e-46	3.99229e-45	ENSG00000163812	ZDHHC3
1089.2	0.355367	0.0249327	14.253	4.29292e-46	4.07514e-45	ENSG00000004975	DVL2
4353.24	0.407127	0.0285648	14.2527	4.31115e-46	4.0896e-45	ENSG00000049618	ARID1B
425.307	0.468762	0.032893	14.2511	4.41379e-46	4.18406e-45	ENSG00000018699	TTC27
12916.7	-0.547707	0.0384329	-14.251	4.41935e-46	4.18643e-45	ENSG00000074800	ENO1
383.175	-1.95693	0.137324	-14.2504	4.45516e-46	4.21743e-45	ENSG00000181409	AATK
304.262	-1.3325	0.0935133	-14.2493	4.52479e-46	4.28038e-45	ENSG00000151914	DST
139.836	-0.610348	0.0428432	-14.2461	4.74146e-46	4.48224e-45	ENSG00000084764	MAPRE3
3340.97	-0.632512	0.0444099	-14.2426	4.98385e-46	4.70811e-45	ENSG00000035403	VCL
886.056	-2.53192	0.177778	-14.242	5.02355e-46	4.74234e-45	ENSG00000161944	ASGR2
80.2039	-1.39909	0.0982539	-14.2396	5.20398e-46	4.90928e-45	ENSG00000161714	PLCD3
67.9321	-1.13539	0.0797415	-14.2384	5.2949e-46	4.9916e-45	ENSG00000273599	NA
465.138	-1.49712	0.105167	-14.2356	5.50994e-46	5.19074e-45	ENSG00000139679	LPAR6
583.853	-1.22958	0.0863786	-14.2348	5.57163e-46	5.24524e-45	ENSG00000171105	INSR
412.731	-0.596922	0.0419346	-14.2346	5.58814e-46	5.25716e-45	ENSG00000137414	FAM8A1
173.708	-2.15929	0.151714	-14.2326	5.75107e-46	5.40672e-45	ENSG00000268849	SIGLEC22P
1411.48	-0.543528	0.0381967	-14.2297	5.9912e-46	5.62859e-45	ENSG00000012232	EXTL3
1431.03	0.697219	0.0490182	14.2237	6.53209e-46	6.13253e-45	ENSG00000133985	TTC9
38.5485	-1.11273	0.0782575	-14.2189	6.99734e-46	6.56481e-45	ENSG00000165511	ZNF22-AS1
244.742	0.954956	0.0671652	14.218	7.08423e-46	6.64177e-45	ENSG00000125245	GPR18
2720.71	-0.396014	0.0278635	-14.2127	7.64477e-46	7.16238e-45	ENSG00000099817	POLR2E
2379.5	-0.896516	0.0630865	-14.2109	7.84113e-46	7.34132e-45	ENSG00000138744	NAAA
356.464	-1.5355	0.108058	-14.2099	7.95015e-46	7.43829e-45	ENSG00000164105	SAP30
936.674	0.441427	0.0310662	14.2093	8.02623e-46	7.50433e-45	ENSG00000138363	ATIC
2975.82	-0.63602	0.0447644	-14.2082	8.15338e-46	7.618e-45	ENSG00000257923	CUX1
2074.79	-0.593713	0.0417924	-14.2062	8.38055e-46	7.8249e-45	ENSG00000068697	LAPTM4A
179.171	-1.32044	0.0929492	-14.2061	8.39955e-46	7.83728e-45	ENSG00000115107	STEAP3
1060.25	-1.36245	0.0959317	-14.2023	8.86622e-46	8.26707e-45	ENSG00000106605	BLVRA
135.628	-0.653096	0.0459938	-14.1996	9.20944e-46	8.58123e-45	ENSG00000188167	TMPPE
2341.47	-1.95357	0.137589	-14.1986	9.34949e-46	8.70579e-45	ENSG00000104093	DMXL2
3981.74	-1.99935	0.140823	-14.1976	9.47597e-46	8.81756e-45	ENSG00000136250	AOAH
840.648	-1.89885	0.133774	-14.1945	9.90752e-46	9.21285e-45	ENSG00000215458	AATBC
115.729	0.662809	0.0467087	14.1903	1.05263e-45	9.78161e-45	ENSG00000154309	DISP1
186.823	-0.956319	0.0673935	-14.1901	1.0552e-45	9.7988e-45	ENSG00000124104	SNX21
3289.14	-0.231425	0.0163098	-14.1893	1.06738e-45	9.90521e-45	ENSG00000132155	RAF1
715.746	-0.470936	0.0331941	-14.1873	1.09765e-45	1.01791e-44	ENSG00000108774	RAB5C
163.582	-2.01176	0.141822	-14.1851	1.1326e-45	1.04962e-44	ENSG00000214787	MS4A4E
67.6568	0.57121	0.0402836	14.1797	1.22329e-45	1.13289e-44	ENSG00000105072	C19orf44
2652.52	0.38875	0.0274163	14.1795	1.22677e-45	1.13535e-44	ENSG00000187735	TCEA1
942.358	-0.725795	0.0511981	-14.1762	1.28601e-45	1.18936e-44	ENSG00000129219	PLD2
1124.18	-1.26474	0.089234	-14.1733	1.33972e-45	1.2382e-44	ENSG00000089041	P2RX7
1095.59	-1.91527	0.135162	-14.1702	1.40094e-45	1.2939e-44	ENSG00000204131	NHSL2
166.923	0.501368	0.0353832	14.1696	1.4122e-45	1.30343e-44	ENSG00000027001	MIPEP
566.548	-0.38847	0.0274183	-14.1683	1.44013e-45	1.3283e-44	ENSG00000140854	KATNB1
186.659	0.556986	0.0393124	14.1682	1.44175e-45	1.3289e-44	ENSG00000173207	CKS1B
114.08	1.04581	0.0738208	14.1669	1.46816e-45	1.35233e-44	ENSG00000132464	ENAM
556.464	0.542356	0.0383089	14.1574	1.68022e-45	1.54662e-44	ENSG00000170734	POLH
871.323	-1.43166	0.10113	-14.1567	1.69719e-45	1.56118e-44	ENSG00000154146	NRGN
717.286	-1.09636	0.0774448	-14.1566	1.69944e-45	1.56221e-44	ENSG00000164086	DUSP7
7338.91	0.497169	0.0351193	14.1566	1.70067e-45	1.56228e-44	ENSG00000133030	MPRIP
57.3644	-1.01884	0.0719714	-14.1562	1.70955e-45	1.56939e-44	ENSG00000164050	PLXNB1
1613.49	-0.442574	0.0312731	-14.1519	1.81756e-45	1.66742e-44	ENSG00000139083	ETV6
681.753	0.794237	0.0561239	14.1515	1.82841e-45	1.67625e-44	ENSG00000230438	SERPINB9P1
7093.81	0.313166	0.0221297	14.1514	1.83104e-45	1.67644e-44	ENSG00000005810	MYCBP2
422.652	-1.52401	0.107694	-14.1514	1.83107e-45	1.67644e-44	ENSG00000134830	C5AR2
122.442	-2.08986	0.147684	-14.1508	1.84561e-45	1.68812e-44	ENSG00000180509	KCNE1
4649.35	-0.590999	0.0417643	-14.1508	1.8463e-45	1.68812e-44	ENSG00000140564	FURIN
133.79	-1.99385	0.140905	-14.1503	1.85893e-45	1.69853e-44	ENSG00000075651	PLD1
1690.92	-0.561918	0.0397127	-14.1496	1.87932e-45	1.71601e-44	ENSG00000132824	SERINC3
326.278	-0.675437	0.0477369	-14.1492	1.88984e-45	1.72446e-44	ENSG00000110171	TRIM3
10028.5	-0.34696	0.0245226	-14.1486	1.90636e-45	1.73838e-44	ENSG00000104904	OAZ1
41.0498	0.881165	0.0622824	14.1479	1.92421e-45	1.75349e-44	ENSG00000196793	ZNF239
3048.51	0.565708	0.0399879	14.147	1.94985e-45	1.77566e-44	ENSG00000114861	FOXP1
36.9377	0.989779	0.0699658	14.1466	1.95964e-45	1.78339e-44	ENSG00000176160	HSF5
77.1037	0.960581	0.0679145	14.144	2.0344e-45	1.85019e-44	ENSG00000082458	DLG3
48.1765	-2.06052	0.145707	-14.1415	2.10701e-45	1.91495e-44	ENSG00000149289	ZC3H12C
819.513	-0.605268	0.0428063	-14.1397	2.16153e-45	1.96319e-44	ENSG00000139629	GALNT6
234.195	-0.530545	0.0375221	-14.1395	2.16769e-45	1.96749e-44	ENSG00000164885	CDK5
2237.41	-0.3542	0.0250536	-14.1377	2.22465e-45	2.01784e-44	ENSG00000033100	CHPF2
1325.18	-1.88367	0.133247	-14.1366	2.25824e-45	2.04695e-44	ENSG00000102524	TNFSF13B
148.9	-2.19384	0.155203	-14.1353	2.30129e-45	2.08459e-44	ENSG00000134222	PSRC1
1587.56	-0.30059	0.0212682	-14.1333	2.36746e-45	2.14311e-44	ENSG00000068903	SIRT2
160.473	-0.48123	0.0340529	-14.1318	2.41768e-45	2.18712e-44	ENSG00000110013	SIAE
269.646	-0.781463	0.0553277	-14.1243	2.69193e-45	2.43361e-44	ENSG00000174516	PELI3
1735.02	-1.84623	0.130745	-14.1208	2.82578e-45	2.55292e-44	ENSG00000131981	LGALS3
3876.44	0.448639	0.0317719	14.1206	2.83519e-45	2.55973e-44	ENSG00000183049	CAMK1D
1638.79	-0.75143	0.0532155	-14.1205	2.8396e-45	2.56202e-44	ENSG00000165097	KDM1B
729.359	-1.16841	0.0827502	-14.1198	2.86946e-45	2.58725e-44	ENSG00000170385	SLC30A1
92.7896	-1.51919	0.107624	-14.1157	3.03943e-45	2.73869e-44	ENSG00000070731	ST6GALNAC2
455.825	0.495089	0.0350839	14.1116	3.22281e-45	2.90201e-44	ENSG00000167232	ZNF91
309.241	-1.67077	0.118404	-14.1108	3.25939e-45	2.93303e-44	ENSG00000205726	ITSN1
3621.89	-1.50537	0.106708	-14.1075	3.41607e-45	3.07199e-44	ENSG00000103381	CPPED1
374.901	-0.769004	0.0545205	-14.1049	3.54474e-45	3.1856e-44	ENSG00000113552	GNPDA1
5593.45	0.372607	0.0264178	14.1044	3.56922e-45	3.2055e-44	ENSG00000149311	ATM
44.6677	-3.04332	0.215781	-14.1038	3.60053e-45	3.23149e-44	ENSG00000230910	NA
42.4075	-1.17873	0.0835797	-14.103	3.63791e-45	3.2629e-44	ENSG00000198673	TAFA2
1487.33	-0.758422	0.0537994	-14.0972	3.95016e-45	3.54063e-44	ENSG00000068366	ACSL4
27.1171	-1.16154	0.0823958	-14.0971	3.95968e-45	3.54684e-44	ENSG00000273855	NA
44.2344	1.14442	0.0811995	14.0939	4.14014e-45	3.70605e-44	ENSG00000080561	MID2
983.911	-1.70991	0.121338	-14.0921	4.24756e-45	3.79972e-44	ENSG00000176463	SLCO3A1
705.99	0.609044	0.0432232	14.0907	4.3331e-45	3.8737e-44	ENSG00000155189	AGPAT5
175.447	1.05588	0.0749412	14.0895	4.40648e-45	3.93673e-44	ENSG00000235162	C12orf75
88.5181	-1.17204	0.083196	-14.0877	4.51973e-45	4.03526e-44	ENSG00000102595	UGGT2
109.49	0.567585	0.0403017	14.0834	4.80376e-45	4.28605e-44	ENSG00000165113	GKAP1
1731.8	-0.300925	0.0213674	-14.0834	4.80706e-45	4.28619e-44	ENSG00000142186	SCYL1
3629.04	-1.18484	0.0841314	-14.0832	4.81988e-45	4.29482e-44	ENSG00000167173	C15orf39
2863.95	-0.585345	0.0415652	-14.0826	4.86157e-45	4.32915e-44	ENSG00000125304	TM9SF2
1131.22	0.741449	0.0526563	14.0809	4.97534e-45	4.42757e-44	ENSG00000147408	CSGALNACT1
97.3208	0.797339	0.0566357	14.0784	5.15725e-45	4.58646e-44	ENSG00000168778	TCTN2
2519.17	-0.497146	0.0353132	-14.0782	5.17283e-45	4.59732e-44	ENSG00000102858	MGRN1
10285.7	0.339444	0.0241131	14.0772	5.24796e-45	4.66106e-44	ENSG00000087274	ADD1
276.99	0.811741	0.0576692	14.0758	5.34798e-45	4.74681e-44	ENSG00000135127	BICDL1
8599.43	-1.4271	0.101406	-14.073	5.56357e-45	4.93496e-44	ENSG00000101347	SAMHD1
250.786	-0.819799	0.0582545	-14.0727	5.5877e-45	4.95315e-44	ENSG00000049449	RCN1
556.102	-0.912471	0.0648409	-14.0725	5.60795e-45	4.96788e-44	ENSG00000109066	TMEM104
60.051	-2.12522	0.151053	-14.0694	5.85464e-45	5.18305e-44	ENSG00000165507	DEPP1
25.1606	-1.2999	0.0923935	-14.0691	5.8779e-45	5.20026e-44	ENSG00000187583	PLEKHN1
7815.58	-0.715074	0.0508356	-14.0664	6.11055e-45	5.4026e-44	ENSG00000137642	SORL1
105.974	0.780761	0.0555072	14.066	6.1488e-45	5.43289e-44	ENSG00000170379	TCAF2
364.233	-2.05329	0.146003	-14.0633	6.3821e-45	5.63539e-44	ENSG00000198853	RUSC2
9158.06	-0.53467	0.0380229	-14.0618	6.52175e-45	5.75498e-44	ENSG00000105329	TGFB1
8973.37	-0.693299	0.0493099	-14.06	6.68509e-45	5.89531e-44	ENSG00000111640	GAPDH
592.077	-0.895514	0.063735	-14.0506	7.64009e-45	6.73314e-44	ENSG00000274180	NATD1
1232.76	0.384908	0.0273947	14.0504	7.65521e-45	6.74211e-44	ENSG00000055044	NOP58
16181.6	-1.05162	0.0748509	-14.0496	7.74897e-45	6.82029e-44	ENSG00000028137	TNFRSF1B
54.9105	-2.40887	0.171465	-14.0487	7.84061e-45	6.8965e-44	ENSG00000213557	NA
259.53	-1.51547	0.107915	-14.0432	8.48053e-45	7.45457e-44	ENSG00000157227	MMP14
118.549	0.949516	0.0676294	14.04	8.87349e-45	7.79497e-44	ENSG00000188171	ZNF626
353.736	-0.605737	0.043145	-14.0396	8.92746e-45	7.83735e-44	ENSG00000095380	NANS
104.342	1.0392	0.0740203	14.0394	8.94415e-45	7.84696e-44	ENSG00000137936	BCAR3
949.313	0.276533	0.0196982	14.0385	9.05933e-45	7.94291e-44	ENSG00000186001	LRCH3
279.258	-2.31661	0.165025	-14.038	9.13158e-45	8.00111e-44	ENSG00000172037	LAMB2
74.3551	0.942665	0.0671642	14.0352	9.49005e-45	8.30987e-44	ENSG00000271109	NA
2423.99	-0.273344	0.0194785	-14.0331	9.7764e-45	8.55513e-44	ENSG00000004455	AK2
1624.27	-2.15406	0.153528	-14.0304	1.01539e-44	8.87977e-44	ENSG00000159339	PADI4
324.536	-0.39431	0.0281047	-14.0301	1.0207e-44	8.92051e-44	ENSG00000100330	MTMR3
7122.44	0.539008	0.0384189	14.0297	1.02517e-44	8.95389e-44	ENSG00000185033	SEMA4B
86.9211	0.656519	0.0468044	14.0269	1.06764e-44	9.31884e-44	ENSG00000066697	MSANTD3
2538.98	-0.509033	0.0362925	-14.0258	1.08307e-44	9.4475e-44	ENSG00000102034	ELF4
165.88	-0.790344	0.0563555	-14.0243	1.10754e-44	9.65472e-44	ENSG00000151689	INPP1
5705.02	-1.8872	0.134584	-14.0225	1.13568e-44	9.89376e-44	ENSG00000132205	EMILIN2
1648.17	-0.356761	0.02545	-14.0181	1.20785e-44	1.05158e-43	ENSG00000125734	GPR108
107.446	0.681785	0.0486457	14.0153	1.25652e-44	1.09326e-43	ENSG00000092470	WDR76
3865.34	-0.683688	0.0487858	-14.0141	1.27827e-44	1.11146e-43	ENSG00000171314	PGAM1
348.253	0.864055	0.0616704	14.0109	1.3378e-44	1.16249e-43	ENSG00000158321	AUTS2
1922.99	-0.526601	0.0375867	-14.0103	1.34851e-44	1.17105e-43	ENSG00000137509	PRCP
2465.7	-0.453917	0.0324085	-14.0061	1.43021e-44	1.24121e-43	ENSG00000148248	SURF4
1357.1	-0.469963	0.0335598	-14.0037	1.4792e-44	1.28291e-43	ENSG00000106829	TLE4
327.731	-0.75642	0.0540161	-14.0036	1.48174e-44	1.2836e-43	ENSG00000129473	BCL2L2
258.013	-0.800573	0.0571691	-14.0036	1.48187e-44	1.2836e-43	ENSG00000143889	HNRNPLL
241.042	-1.82752	0.130512	-14.0027	1.49971e-44	1.29823e-43	ENSG00000256235	SMIM3
267.635	-1.17337	0.0838063	-14.001	1.53715e-44	1.3298e-43	ENSG00000051128	HOMER3
253.399	-1.61172	0.115119	-14.0005	1.54851e-44	1.33877e-43	ENSG00000180340	FZD2
14889.3	-0.617681	0.0441326	-13.996	1.6481e-44	1.42398e-43	ENSG00000087086	FTL
807.058	-0.517689	0.0369917	-13.9947	1.67919e-44	1.44992e-43	ENSG00000164535	DAGLB
311.994	0.467757	0.0334259	13.9939	1.699e-44	1.4661e-43	ENSG00000057935	MTA3
891.42	-0.750889	0.0536597	-13.9935	1.70716e-44	1.47221e-43	ENSG00000131979	GCH1
304.16	0.703913	0.0503076	13.9922	1.74039e-44	1.49957e-43	ENSG00000104524	PYCR3
444.718	-0.502389	0.0359051	-13.9921	1.74108e-44	1.49957e-43	ENSG00000131697	NPHP4
99.681	0.828681	0.0592264	13.9917	1.75078e-44	1.50697e-43	ENSG00000156011	PSD3
48.8779	-2.0078	0.143508	-13.9909	1.77235e-44	1.52458e-43	ENSG00000279095	NA
1739.4	-1.66341	0.118901	-13.9898	1.79848e-44	1.54608e-43	ENSG00000214212	C19orf38
3684.02	-0.906634	0.0648107	-13.989	1.82077e-44	1.56426e-43	ENSG00000136040	PLXNC1
29.3405	0.91899	0.0657058	13.9864	1.88625e-44	1.6195e-43	ENSG00000121621	KIF18A
634.896	0.361559	0.0258607	13.981	2.03583e-44	1.74682e-43	ENSG00000231074	HCG18
3008.32	-0.481286	0.0344249	-13.9807	2.04327e-44	1.75211e-43	ENSG00000010256	UQCRC1
111.843	-2.38898	0.170884	-13.9801	2.0621e-44	1.76715e-43	ENSG00000164124	TMEM144
61.4837	-1.48384	0.106162	-13.9772	2.14802e-44	1.83962e-43	ENSG00000135540	NHSL1
272.129	0.960995	0.0687734	13.9734	2.26671e-44	1.94005e-43	ENSG00000104154	SLC30A4
2187.34	-0.76782	0.0549619	-13.97	2.37477e-44	2.03127e-43	ENSG00000214176	PLEKHM1P1
98.0152	0.725369	0.0519305	13.9681	2.44163e-44	2.08715e-43	ENSG00000163006	CCDC138
296.186	-1.96816	0.140914	-13.9671	2.47555e-44	2.11482e-43	ENSG00000073008	PVR
108.639	1.00135	0.0717128	13.9634	2.6072e-44	2.2259e-43	ENSG00000168280	KIF5C
47.0841	0.889336	0.0636978	13.9618	2.66654e-44	2.27514e-43	ENSG00000267309	ZNF566-AS1
5265.54	-1.9553	0.140049	-13.9615	2.6763e-44	2.28204e-43	ENSG00000178695	KCTD12
2077.79	-1.02797	0.073632	-13.961	2.69783e-44	2.29896e-43	ENSG00000159399	HK2
251.961	-1.25509	0.089908	-13.9597	2.74684e-44	2.33927e-43	ENSG00000075618	FSCN1
140.705	0.6848	0.0490565	13.9594	2.75644e-44	2.34598e-43	ENSG00000170545	SMAGP
92.7266	-1.23106	0.088194	-13.9585	2.7921e-44	2.37485e-43	ENSG00000079308	TNS1
811.774	-0.490903	0.03517	-13.958	2.81185e-44	2.39016e-43	ENSG00000197562	RAB40C
79.6294	-1.77188	0.126998	-13.952	3.05706e-44	2.59698e-43	ENSG00000136404	TM6SF1
1404.55	-0.236702	0.0169722	-13.9464	3.30758e-44	2.80805e-43	ENSG00000112146	FBXO9
1204.39	-0.598286	0.0429073	-13.9437	3.43725e-44	2.91632e-43	ENSG00000198189	HSD17B11
10433	-1.04276	0.0747919	-13.9421	3.51369e-44	2.97933e-43	ENSG00000261371	PECAM1
294.911	-1.61926	0.116144	-13.9418	3.52814e-44	2.98973e-43	ENSG00000106069	CHN2
1985.47	-0.991223	0.0711074	-13.9398	3.62931e-44	3.07355e-43	ENSG00000109861	CTSC
29.6381	0.83293	0.0597658	13.9366	3.79808e-44	3.21448e-43	ENSG00000281706	LINC01012
232.271	-2.47338	0.177514	-13.9334	3.96821e-44	3.3564e-43	ENSG00000166527	CLEC4D
56.2936	-2.23463	0.160385	-13.9328	4.00101e-44	3.38205e-43	ENSG00000256660	CLEC12B
314.433	-0.534268	0.0383463	-13.9327	4.00801e-44	3.38586e-43	ENSG00000102870	ZNF629
1865.93	-1.7028	0.122218	-13.9325	4.01944e-44	3.39342e-43	ENSG00000072110	ACTN1
2210.93	-0.769974	0.05528	-13.9286	4.245e-44	3.58164e-43	ENSG00000156675	RAB11FIP1
2906.26	-0.370276	0.0265857	-13.9277	4.3018e-44	3.62732e-43	ENSG00000149923	PPP4C
157.105	0.598304	0.0429581	13.9276	4.30522e-44	3.62796e-43	ENSG00000197808	ZNF461
1169.04	-0.483693	0.0347306	-13.927	4.34291e-44	3.65747e-43	ENSG00000170871	KIAA0232
81.875	1.09228	0.0784305	13.9267	4.36172e-44	3.67105e-43	ENSG00000125726	CD70
627.598	0.438545	0.0315117	13.9169	4.99936e-44	4.20512e-43	ENSG00000149308	NPAT
239.365	-1.57564	0.113246	-13.9134	5.24912e-44	4.41249e-43	ENSG00000023171	GRAMD1B
2315.26	0.38274	0.0275147	13.9104	5.47762e-44	4.60174e-43	ENSG00000126001	CEP250
484.169	0.747998	0.0537785	13.9089	5.5965e-44	4.69872e-43	ENSG00000171291	ZNF439
1320.63	0.350448	0.0251969	13.9084	5.63546e-44	4.72853e-43	ENSG00000188994	ZNF292
2094.22	-1.47661	0.10617	-13.908	5.66516e-44	4.75053e-43	ENSG00000163191	S100A11
310.006	1.22759	0.088318	13.8997	6.36217e-44	5.33173e-43	ENSG00000253701	NA
52.5917	1.07567	0.0774068	13.8963	6.67058e-44	5.58676e-43	ENSG00000187510	PLEKHG7
379.374	0.713115	0.051322	13.8949	6.79904e-44	5.69086e-43	ENSG00000166669	ATF7IP2
177.642	-1.00892	0.0726129	-13.8945	6.83926e-44	5.72102e-43	ENSG00000173599	PC
699.548	-2.23672	0.160994	-13.8932	6.96987e-44	5.82671e-43	ENSG00000146592	CREB5
844.05	-1.67405	0.120502	-13.8923	7.05258e-44	5.89225e-43	ENSG00000255197	NA
276.956	-1.42001	0.102256	-13.8869	7.60876e-44	6.35303e-43	ENSG00000130052	STARD8
243.246	-0.681711	0.0490927	-13.8862	7.68159e-44	6.40993e-43	ENSG00000122126	OCRL
918.221	-2.14232	0.15428	-13.8859	7.71285e-44	6.43208e-43	ENSG00000187164	SHTN1
387.025	0.410955	0.0295956	13.8857	7.73598e-44	6.44744e-43	ENSG00000138617	PARP16
57.1105	0.943229	0.0679357	13.8842	7.90323e-44	6.58282e-43	ENSG00000114993	RTKN
19536.1	-0.490616	0.0353428	-13.8816	8.18459e-44	6.81301e-43	ENSG00000114353	GNAI2
670.514	0.923599	0.0665439	13.8795	8.42911e-44	7.01228e-43	ENSG00000005471	ABCB4
108.911	0.856441	0.0617174	13.8768	8.7527e-44	7.27705e-43	ENSG00000185614	INKA1
2522.94	-0.580107	0.0418111	-13.8745	9.04413e-44	7.51477e-43	ENSG00000130429	ARPC1B
209.169	0.475238	0.0342534	13.8742	9.08123e-44	7.54101e-43	ENSG00000213551	DNAJC9
1259.5	-0.387818	0.0279537	-13.8736	9.16221e-44	7.60363e-43	ENSG00000064961	HMG20B
410.638	-0.854397	0.0615875	-13.8729	9.24678e-44	7.66916e-43	ENSG00000165389	SPTSSA
645.137	0.444054	0.0320099	13.8724	9.31356e-44	7.71728e-43	ENSG00000103264	FBXO31
106.83	0.580261	0.0418286	13.8724	9.3161e-44	7.71728e-43	ENSG00000260804	LINC01963
3546.8	0.391426	0.0282174	13.8718	9.39263e-44	7.77596e-43	ENSG00000162298	SYVN1
72.25	0.581912	0.0419536	13.8704	9.57699e-44	7.92378e-43	ENSG00000197863	ZNF790
791.672	-0.628434	0.0453108	-13.8694	9.70749e-44	8.0269e-43	ENSG00000054523	KIF1B
524.561	-0.573004	0.0413223	-13.8667	1.00817e-43	8.33128e-43	ENSG00000139178	C1RL
73.5509	-0.935618	0.0674778	-13.8656	1.02401e-43	8.45709e-43	ENSG00000278918	NA
705.911	0.733969	0.0529355	13.8653	1.02749e-43	8.48069e-43	ENSG00000283013	NA
78.3538	0.81813	0.0590142	13.8633	1.05738e-43	8.72212e-43	ENSG00000079385	CEACAM1
4840.96	0.46531	0.0335715	13.8603	1.10237e-43	9.08772e-43	ENSG00000163346	PBXIP1
186.675	0.55183	0.0398197	13.8582	1.13427e-43	9.34507e-43	ENSG00000188191	PRKAR1B
4310.93	-2.09235	0.151001	-13.8566	1.161e-43	9.55955e-43	ENSG00000198053	SIRPA
2602.2	0.331909	0.0239555	13.8552	1.18285e-43	9.73361e-43	ENSG00000164574	GALNT10
28.7872	-2.3834	0.172065	-13.8518	1.24079e-43	1.02042e-42	ENSG00000254952	LINC02705
115.965	1.09544	0.079088	13.8509	1.25599e-43	1.0323e-42	ENSG00000163492	CCDC141
544.81	-0.561759	0.0405627	-13.8491	1.2873e-43	1.0574e-42	ENSG00000145332	KLHL8
129.22	-1.7057	0.123165	-13.8488	1.29303e-43	1.06147e-42	ENSG00000279396	NA
1529.51	-2.09667	0.151464	-13.8427	1.40752e-43	1.15476e-42	ENSG00000133816	MICAL2
563.44	0.448896	0.0324304	13.8418	1.42532e-43	1.16866e-42	ENSG00000083814	ZNF671
7341.5	-2.71567	0.196223	-13.8397	1.4672e-43	1.20228e-42	ENSG00000010327	STAB1
162.389	-0.867417	0.0626848	-13.8378	1.5084e-43	1.2353e-42	ENSG00000259953	NA
130.768	-2.19121	0.158351	-13.8376	1.51104e-43	1.23672e-42	ENSG00000146373	RNF217
594.166	0.61777	0.0446449	13.8374	1.5159e-43	1.23995e-42	ENSG00000173581	CCDC106
2403.93	-1.65678	0.119736	-13.837	1.52439e-43	1.24615e-42	ENSG00000135604	STX11
6247.77	-2.01054	0.145334	-13.834	1.59015e-43	1.29913e-42	ENSG00000235568	NFAM1
1392.89	0.515795	0.0372867	13.8332	1.60692e-43	1.31205e-42	ENSG00000134744	TUT4
50.9543	-1.04071	0.0752337	-13.8331	1.61042e-43	1.31411e-42	ENSG00000143434	SEMA6C
97.795	-1.28758	0.0930824	-13.8326	1.61961e-43	1.32082e-42	ENSG00000235602	POU5F1P3
1459.57	-2.13927	0.154656	-13.8324	1.62514e-43	1.32455e-42	ENSG00000105383	CD33
451.475	1.09096	0.0788868	13.8294	1.69338e-43	1.37934e-42	ENSG00000163520	FBLN2
1115.13	-0.481015	0.0347858	-13.8279	1.72889e-43	1.40716e-42	ENSG00000181481	RNF135
424.775	0.803099	0.0580781	13.8279	1.7296e-43	1.40716e-42	ENSG00000145365	TIFA
601.9	-0.534021	0.0386219	-13.8269	1.75464e-43	1.42669e-42	ENSG00000162636	FAM102B
298.984	0.506469	0.0366299	13.8266	1.76034e-43	1.43047e-42	ENSG00000198521	ZNF43
653.5	-2.02723	0.146641	-13.8244	1.81509e-43	1.47409e-42	ENSG00000115828	QPCT
210.16	0.684586	0.0495212	13.8241	1.82394e-43	1.4804e-42	ENSG00000134070	IRAK2
353.91	-1.66385	0.12038	-13.8216	1.88762e-43	1.53117e-42	ENSG00000166002	SMCO4
90.2944	-1.06883	0.077343	-13.8194	1.94716e-43	1.57853e-42	ENSG00000132846	ZBED3
547.893	0.426764	0.030882	13.8192	1.95174e-43	1.5813e-42	ENSG00000184117	NIPSNAP1
164.082	-1.29761	0.0939027	-13.8187	1.96562e-43	1.59125e-42	ENSG00000134571	MYBPC3
935.134	-0.491116	0.03554	-13.8187	1.96634e-43	1.59125e-42	ENSG00000111647	UHRF1BP1L
1398.78	-0.629815	0.04559	-13.8148	2.07641e-43	1.67932e-42	ENSG00000116514	RNF19B
82.763	-1.39297	0.100837	-13.8141	2.09551e-43	1.69377e-42	ENSG00000186522	SEPTIN10
1003.74	-1.47008	0.106449	-13.8101	2.21457e-43	1.78894e-42	ENSG00000102265	TIMP1
608.156	0.975156	0.0706123	13.81	2.21812e-43	1.79075e-42	ENSG00000197705	KLHL14
96.8597	-0.910012	0.0658962	-13.8098	2.22493e-43	1.79519e-42	ENSG00000162073	PAQR4
474.495	-0.882853	0.0639349	-13.8086	2.26062e-43	1.82291e-42	ENSG00000165752	STK32C
3063.07	-0.972249	0.0704167	-13.8071	2.30999e-43	1.86162e-42	ENSG00000168461	RAB31
277.762	-1.14319	0.0828	-13.8067	2.32329e-43	1.87124e-42	ENSG00000205133	TRIQK
6756.68	-1.98575	0.143835	-13.8057	2.35357e-43	1.8945e-42	ENSG00000160593	JAML
809.12	0.804067	0.0582525	13.8031	2.43992e-43	1.96285e-42	ENSG00000125731	SH2D3A
312.265	-0.543979	0.0394112	-13.8027	2.45579e-43	1.97446e-42	ENSG00000133247	KMT5C
192.856	-1.73634	0.125801	-13.8023	2.46799e-43	1.98311e-42	ENSG00000171812	COL8A2
2678.13	-0.650694	0.0471515	-13.8001	2.54606e-43	2.04463e-42	ENSG00000167996	FTH1
49.7998	0.579782	0.0420221	13.7971	2.65421e-43	2.13023e-42	ENSG00000186073	CDIN1
852.994	-0.570834	0.0413805	-13.7948	2.74085e-43	2.19848e-42	ENSG00000072210	ALDH3A2
248.986	0.540228	0.0391672	13.7929	2.81314e-43	2.25513e-42	ENSG00000116396	KCNC4
288.613	-1.18103	0.0856278	-13.7926	2.82319e-43	2.26187e-42	ENSG00000076067	RBMS2
1815.58	-0.482737	0.0350011	-13.792	2.84653e-43	2.27923e-42	ENSG00000129925	PGAP6
7609.14	-1.86011	0.13487	-13.7918	2.85514e-43	2.28478e-42	ENSG00000010610	CD4
226.847	0.74833	0.0542649	13.7903	2.91487e-43	2.33121e-42	ENSG00000063180	CA11
29.2271	-1.10975	0.0804779	-13.7895	2.94784e-43	2.3562e-42	ENSG00000093217	XYLB
2010.45	0.455819	0.0330629	13.7864	3.07737e-43	2.4583e-42	ENSG00000145287	PLAC8
326.597	-0.604705	0.0438656	-13.7854	3.12019e-43	2.49105e-42	ENSG00000157823	AP3S2
44.0554	-1.29519	0.0939708	-13.7829	3.22947e-43	2.57678e-42	ENSG00000261888	NA
319.265	-2.20038	0.159657	-13.7819	3.27347e-43	2.61037e-42	ENSG00000164023	SGMS2
2286.71	-0.268213	0.0194625	-13.781	3.31664e-43	2.64325e-42	ENSG00000062485	CS
262.454	-1.18348	0.0858841	-13.78	3.36432e-43	2.67969e-42	ENSG00000117643	MAN1C1
221.488	0.577612	0.0419213	13.7785	3.43436e-43	2.73388e-42	ENSG00000071794	HLTF
42.4246	-1.5271	0.110837	-13.7779	3.4614e-43	2.7538e-42	ENSG00000105464	GRIN2D
239.12	-0.840908	0.0610512	-13.7738	3.66296e-43	2.91246e-42	ENSG00000169136	ATF5
261.921	-1.22308	0.0888246	-13.7696	3.88101e-43	3.08404e-42	ENSG00000180263	FGD6
72.4199	-1.87906	0.13648	-13.768	3.97107e-43	3.15377e-42	ENSG00000242193	CRYZL2P
2477.39	-0.409181	0.0297209	-13.7674	4.0013e-43	3.17593e-42	ENSG00000107341	UBE2R2
5948.43	-2.08243	0.151309	-13.7628	4.26852e-43	3.38607e-42	ENSG00000186407	CD300E
3572.67	-0.269461	0.0195868	-13.7572	4.60845e-43	3.6536e-42	ENSG00000159322	ADPGK
31.5826	1.24118	0.0902288	13.7559	4.69367e-43	3.719e-42	ENSG00000124429	POF1B
3073.87	-0.446383	0.0324538	-13.7544	4.79143e-43	3.79426e-42	ENSG00000196588	MRTFA
974.216	-0.464875	0.0338012	-13.7532	4.87236e-43	3.8561e-42	ENSG00000070444	MNT
1020.83	0.345131	0.0250962	13.7523	4.93148e-43	3.90064e-42	ENSG00000177192	PUS1
868.205	1.01938	0.0741306	13.7512	5.01108e-43	3.9613e-42	ENSG00000239951	IGKV3-20
4678.1	0.919608	0.0668772	13.7507	5.04462e-43	3.98551e-42	ENSG00000107742	SPOCK2
293.47	0.511952	0.0372331	13.7499	5.09819e-43	4.02551e-42	ENSG00000186260	MRTFB
912.441	0.367318	0.0267148	13.7496	5.12244e-43	4.04232e-42	ENSG00000106628	POLD2
12024.6	-0.429097	0.0312204	-13.7441	5.52455e-43	4.35712e-42	ENSG00000131236	CAP1
4414.13	0.433939	0.0315765	13.7425	5.64961e-43	4.45318e-42	ENSG00000124151	NCOA3
141.975	0.634619	0.0461824	13.7416	5.72155e-43	4.50729e-42	ENSG00000138376	BARD1
386.051	-1.51012	0.109904	-13.7403	5.82196e-43	4.58375e-42	ENSG00000139832	RAB20
81.5939	-1.70172	0.123863	-13.7388	5.94898e-43	4.68105e-42	ENSG00000104951	IL4I1
109.758	-1.29036	0.0939232	-13.7384	5.97442e-43	4.69837e-42	ENSG00000118200	CAMSAP2
27.4496	-1.20068	0.0874016	-13.7375	6.05147e-43	4.75622e-42	ENSG00000055957	ITIH1
909.994	-0.486567	0.0354221	-13.7363	6.15614e-43	4.8357e-42	ENSG00000108528	SLC25A11
66.8863	-1.54532	0.112504	-13.7357	6.20686e-43	4.87274e-42	ENSG00000175556	LONRF3
668.491	0.848979	0.0618171	13.7337	6.37709e-43	5.00351e-42	ENSG00000146757	ZNF92
1768	-0.345383	0.0251523	-13.7317	6.55749e-43	5.1421e-42	ENSG00000164808	SPIDR
261.877	0.505929	0.0368476	13.7303	6.68284e-43	5.23738e-42	ENSG00000182504	CEP97
42.1298	0.694648	0.0505985	13.7286	6.84191e-43	5.35897e-42	ENSG00000247708	STX18-AS1
3405.8	-0.223559	0.0162854	-13.7276	6.94405e-43	5.43586e-42	ENSG00000155463	OXA1L
1129.49	-0.627603	0.0457233	-13.7261	7.08317e-43	5.54158e-42	ENSG00000100092	SH3BP1
124.998	-2.09232	0.152446	-13.725	7.19136e-43	5.62301e-42	ENSG00000187098	MITF
1389.88	-0.519456	0.0378505	-13.7239	7.30353e-43	5.70745e-42	ENSG00000131507	NDFIP1
961.788	-2.0753	0.151244	-13.7215	7.54726e-43	5.89454e-42	ENSG00000198223	CSF2RA
37.2461	-1.85616	0.135281	-13.7208	7.6272e-43	5.95357e-42	ENSG00000246430	LINC00968
105.82	-1.03671	0.0755754	-13.7175	7.97363e-43	6.22043e-42	ENSG00000134463	ECHDC3
79.3604	0.819401	0.0597372	13.7168	8.05707e-43	6.28194e-42	ENSG00000196172	ZNF681
69.1125	0.507084	0.0369708	13.7158	8.16432e-43	6.36193e-42	ENSG00000148950	IMMP1L
7036.24	0.424233	0.0309319	13.7151	8.24765e-43	6.4232e-42	ENSG00000129353	SLC44A2
1990.52	-2.05977	0.150199	-13.7136	8.41877e-43	6.55273e-42	ENSG00000136830	NIBAN2
142.507	0.894552	0.065263	13.7069	9.23399e-43	7.18316e-42	ENSG00000166402	TUB
1935.08	0.306391	0.0223609	13.7021	9.86529e-43	7.66988e-42	ENSG00000124177	CHD6
382.779	-1.87763	0.137034	-13.7019	9.88545e-43	7.68118e-42	ENSG00000163803	PLB1
278.726	-0.71429	0.0521319	-13.7016	9.93251e-43	7.71336e-42	ENSG00000158716	DUSP23
2089.16	-0.507649	0.0370509	-13.7014	9.95825e-43	7.72896e-42	ENSG00000112697	TMEM30A
130.132	-0.781329	0.0570281	-13.7008	1.00459e-42	7.79252e-42	ENSG00000155099	PIP4P2
642.055	-0.376543	0.0274871	-13.6989	1.03042e-42	7.98838e-42	ENSG00000100997	ABHD12
245.616	-0.480303	0.0350661	-13.6971	1.05668e-42	8.1873e-42	ENSG00000109083	IFT20
142.36	-0.624552	0.0456033	-13.6953	1.08261e-42	8.38349e-42	ENSG00000172780	RAB43
942.755	-1.86614	0.136299	-13.6915	1.14103e-42	8.8309e-42	ENSG00000145569	OTULINL
207.867	-2.33429	0.170506	-13.6904	1.15858e-42	8.96164e-42	ENSG00000183307	TMEM121B
384.184	0.524206	0.0382973	13.6878	1.20074e-42	9.28248e-42	ENSG00000176903	PNMA1
134.69	-0.756603	0.0552893	-13.6845	1.25745e-42	9.71537e-42	ENSG00000025434	NR1H3
2435.94	-0.593162	0.0433511	-13.6827	1.28781e-42	9.94431e-42	ENSG00000170638	TRABD
6504.52	-0.392271	0.0286715	-13.6816	1.30859e-42	1.00991e-41	ENSG00000137161	CNPY3
8952.28	-0.411183	0.0300575	-13.6799	1.33941e-42	1.03311e-41	ENSG00000183283	DAZAP2
1797.93	-0.92491	0.0676187	-13.6783	1.36831e-42	1.0548e-41	ENSG00000114013	CD86
3293.91	-0.27732	0.0202748	-13.6781	1.37246e-42	1.05741e-41	ENSG00000100991	TRPC4AP
4808.09	-0.491677	0.0359634	-13.6716	1.50067e-42	1.15554e-41	ENSG00000185624	P4HB
249.187	-1.5403	0.112671	-13.6708	1.51753e-42	1.16786e-41	ENSG00000241163	LINC00877
48.9282	-2.31974	0.169735	-13.6668	1.60276e-42	1.23276e-41	ENSG00000180113	TDRD6
7167.12	-1.99556	0.146024	-13.666	1.62103e-42	1.2461e-41	ENSG00000120708	TGFBI
1456.62	0.524046	0.0383505	13.6647	1.65088e-42	1.26834e-41	ENSG00000161791	FMNL3
1504.39	-2.14232	0.156786	-13.6639	1.66718e-42	1.28014e-41	ENSG00000140090	SLC24A4
690.329	-2.05094	0.150131	-13.661	1.73554e-42	1.33188e-41	ENSG00000155254	MARVELD1
1612.35	0.342442	0.0250702	13.6593	1.77609e-42	1.36224e-41	ENSG00000151461	UPF2
270.243	0.958017	0.0701481	13.6571	1.83222e-42	1.4045e-41	ENSG00000176658	MYO1D
330.8	0.499178	0.0365557	13.6553	1.8779e-42	1.43871e-41	ENSG00000173611	SCAI
6929.25	-0.671703	0.0492009	-13.6523	1.95692e-42	1.49841e-41	ENSG00000197081	IGF2R
4274.71	-2.33361	0.170955	-13.6504	2.00669e-42	1.53565e-41	ENSG00000110077	MS4A6A
377.948	-0.787324	0.0576782	-13.6503	2.01059e-42	1.53746e-41	ENSG00000163328	GPR155
3961.13	0.291034	0.0213207	13.6503	2.0113e-42	1.53746e-41	ENSG00000196367	TRRAP
277.071	0.475539	0.0348423	13.6483	2.06541e-42	1.57794e-41	ENSG00000168005	SPINDOC
28.1087	-1.58734	0.116307	-13.6478	2.07958e-42	1.58787e-41	ENSG00000174776	WDR49
204.723	-0.828085	0.0606801	-13.6467	2.11161e-42	1.61143e-41	ENSG00000118655	DCLRE1B
1941.53	-2.07747	0.152242	-13.6459	2.13687e-42	1.6298e-41	ENSG00000181444	ZNF467
684.594	-0.744057	0.054527	-13.6457	2.14231e-42	1.63303e-41	ENSG00000163754	GYG1
19248.2	-0.284679	0.0208631	-13.6451	2.16017e-42	1.64573e-41	ENSG00000173020	GRK2
93.3311	0.78691	0.0576761	13.6436	2.20411e-42	1.67827e-41	ENSG00000162746	FCRLB
119.734	0.952804	0.0698384	13.643	2.22317e-42	1.69184e-41	ENSG00000163536	SERPINI1
1073.01	-0.612384	0.0448877	-13.6426	2.23447e-42	1.69949e-41	ENSG00000102580	DNAJC3
4937.93	-0.560443	0.0410855	-13.6409	2.2879e-42	1.73916e-41	ENSG00000160685	ZBTB7B
4786.53	-0.540695	0.0396501	-13.6367	2.4241e-42	1.84167e-41	ENSG00000126247	CAPNS1
4264.47	-0.412482	0.0302506	-13.6355	2.46302e-42	1.8702e-41	ENSG00000143321	HDGF
1780.59	-1.25656	0.0921806	-13.6315	2.60101e-42	1.97388e-41	ENSG00000134955	SLC37A2
939.191	0.514916	0.0377812	13.6289	2.69678e-42	2.04542e-41	ENSG00000162852	CNST
4166.66	-0.400615	0.0293949	-13.6287	2.70286e-42	2.04889e-41	ENSG00000003402	CFLAR
370.382	0.469519	0.0344566	13.6264	2.79044e-42	2.11411e-41	ENSG00000197302	KRBOX5
2352.07	-1.86332	0.136756	-13.6251	2.8394e-42	2.15001e-41	ENSG00000136869	TLR4
433.766	-0.558682	0.041008	-13.6237	2.89475e-42	2.1907e-41	ENSG00000213753	CENPBD2P
213.616	-1.27093	0.0932915	-13.6232	2.91357e-42	2.20373e-41	ENSG00000141447	OSBPL1A
60.1996	-2.02674	0.148785	-13.6219	2.96562e-42	2.24084e-41	ENSG00000259668	NA
132.203	-1.11364	0.0817531	-13.6219	2.96591e-42	2.24084e-41	ENSG00000110080	ST3GAL4
571.622	-1.92639	0.141436	-13.6202	3.03763e-42	2.29376e-41	ENSG00000185340	GAS2L1
31.7251	-1.16652	0.0856601	-13.618	3.12889e-42	2.36136e-41	ENSG00000265666	RARA-AS1
27.337	-1.06039	0.0778687	-13.6177	3.14239e-42	2.37024e-41	ENSG00000188211	NCR3LG1
1570.38	-0.439797	0.0323022	-13.6151	3.2587e-42	2.45662e-41	ENSG00000173744	AGFG1
11410.7	-1.76919	0.130037	-13.6053	3.72471e-42	2.80638e-41	ENSG00000127951	FGL2
266.445	0.418432	0.0307568	13.6046	3.76258e-42	2.83334e-41	ENSG00000067533	RRP15
1846.45	-2.24633	0.165119	-13.6043	3.7753e-42	2.84108e-41	ENSG00000196209	SIRPB2
314.172	0.372385	0.0273726	13.6043	3.77702e-42	2.84108e-41	ENSG00000138443	ABI2
593.703	-1.86533	0.137126	-13.603	3.84102e-42	2.88763e-41	ENSG00000113749	HRH2
11992.3	-1.74415	0.12822	-13.6028	3.8565e-42	2.89768e-41	ENSG00000196576	PLXNB2
47.1715	1.14336	0.084062	13.6014	3.92607e-42	2.94833e-41	ENSG00000103089	FA2H
4653.27	-1.55926	0.114646	-13.6006	3.97001e-42	2.97969e-41	ENSG00000082074	FYB1
54.1252	-1.54839	0.113867	-13.5983	4.09936e-42	3.07508e-41	ENSG00000222009	BTBD19
4987.81	0.901198	0.066278	13.5972	4.15814e-42	3.11746e-41	ENSG00000159958	TNFRSF13C
93.3488	-0.660807	0.0486086	-13.5944	4.3208e-42	3.23764e-41	ENSG00000239911	PRKAG2-AS1
176.924	1.09038	0.080223	13.5919	4.47183e-42	3.34897e-41	ENSG00000156966	B3GNT7
401.221	-0.373481	0.02748	-13.591	4.52746e-42	3.38877e-41	ENSG00000067365	METTL22
71.4049	0.676527	0.0497855	13.5888	4.66517e-42	3.48993e-41	ENSG00000118242	MREG
58.3494	1.00718	0.0741354	13.5857	4.86995e-42	3.64113e-41	ENSG00000155970	MICU3
2365.5	0.938423	0.0690748	13.5856	4.87494e-42	3.64287e-41	ENSG00000102096	PIM2
1757.98	-1.96604	0.14472	-13.5851	4.90679e-42	3.66466e-41	ENSG00000100504	PYGL
554.56	-1.67218	0.123091	-13.5849	4.92147e-42	3.67362e-41	ENSG00000180539	LINC02908
3453.67	-0.29911	0.0220231	-13.5816	5.14621e-42	3.83928e-41	ENSG00000163719	MTMR14
27.4366	1.22696	0.0903408	13.5815	5.15653e-42	3.84488e-41	ENSG00000211599	IGKV5-2
1309.28	0.704616	0.0518872	13.5798	5.27936e-42	3.93432e-41	ENSG00000156711	MAPK13
289.471	-2.12117	0.156206	-13.5793	5.31447e-42	3.95832e-41	ENSG00000105352	CEACAM4
2525.88	0.820433	0.0604209	13.5786	5.3625e-42	3.99192e-41	ENSG00000133056	PIK3C2B
40.3346	1.04463	0.0769463	13.5761	5.54716e-42	4.12714e-41	ENSG00000197465	GYPE
55.8928	-1.20006	0.0884257	-13.5714	5.92197e-42	4.4036e-41	ENSG00000141527	CARD14
392.3	-2.06667	0.152291	-13.5705	5.98993e-42	4.45171e-41	ENSG00000187554	TLR5
2101.25	0.630683	0.0464776	13.5696	6.06594e-42	4.50575e-41	ENSG00000150907	FOXO1
631.006	1.14299	0.084249	13.5668	6.30243e-42	4.67887e-41	ENSG00000211598	IGKV4-1
606.813	-0.820517	0.06048	-13.5667	6.30664e-42	4.67945e-41	ENSG00000124496	TRERF1
26.3641	0.916433	0.0675664	13.5634	6.59624e-42	4.89167e-41	ENSG00000225938	NA
71.6388	0.930439	0.0686074	13.5618	6.74812e-42	5.00159e-41	ENSG00000112486	CCR6
41.5054	-1.43035	0.105477	-13.5608	6.84283e-42	5.06904e-41	ENSG00000122386	ZNF205
775.718	-0.75422	0.0556198	-13.5603	6.88756e-42	5.09941e-41	ENSG00000158470	B4GALT5
3986.01	-0.47478	0.0350151	-13.5593	6.98238e-42	5.16681e-41	ENSG00000153113	CAST
965.039	-1.20573	0.0889233	-13.5592	6.99184e-42	5.17101e-41	ENSG00000140044	JDP2
3813.58	-0.403259	0.0297551	-13.5526	7.64636e-42	5.65202e-41	ENSG00000138964	PARVG
54.7606	-0.614379	0.0453399	-13.5505	7.86776e-42	5.81252e-41	ENSG00000257365	FNTB
1366.84	-0.30524	0.0225312	-13.5474	8.20816e-42	6.06072e-41	ENSG00000148218	ALAD
538.51	-2.00026	0.147656	-13.5468	8.27967e-42	6.11022e-41	ENSG00000060558	GNA15
365.491	0.682503	0.0503931	13.5436	8.64554e-42	6.37678e-41	ENSG00000259834	NA
102.715	-1.4195	0.104821	-13.5421	8.82644e-42	6.5067e-41	ENSG00000071205	ARHGAP10
108.97	-2.02422	0.149483	-13.5414	8.903e-42	6.5596e-41	ENSG00000197046	SIGLEC15
67.2069	-2.25934	0.166857	-13.5405	9.01128e-42	6.6358e-41	ENSG00000186567	CEACAM19
522.694	-2.35187	0.173716	-13.5386	9.25226e-42	6.80958e-41	ENSG00000181982	CCDC149
275.4	-0.474083	0.0350183	-13.5382	9.3083e-42	6.84714e-41	ENSG00000196511	TPK1
208.297	-0.896999	0.0662664	-13.5363	9.55385e-42	7.02398e-41	ENSG00000226328	NUP50-DT
1055.45	-0.321109	0.0237259	-13.5341	9.83762e-42	7.22872e-41	ENSG00000215305	VPS16
289.944	-1.49148	0.110216	-13.5324	1.0071e-41	7.39621e-41	ENSG00000279117	NA
1441.91	-1.65031	0.121957	-13.5319	1.01432e-41	7.44529e-41	ENSG00000131669	NINJ1
32.9977	-2.16422	0.159948	-13.5308	1.02912e-41	7.54982e-41	ENSG00000175262	C1orf127
3810.16	-2.0314	0.15017	-13.5274	1.0778e-41	7.90271e-41	ENSG00000106066	CPVL
1171.68	-0.402735	0.0297738	-13.5265	1.09103e-41	7.99544e-41	ENSG00000177302	TOP3A
1099.78	-2.19052	0.16195	-13.5259	1.09995e-41	8.05644e-41	ENSG00000109743	BST1
118.091	0.437486	0.0323471	13.5247	1.11742e-41	8.18002e-41	ENSG00000139324	TMTC3
1338.38	-2.16935	0.160423	-13.5227	1.14883e-41	8.40547e-41	ENSG00000151948	GLT1D1
430.232	-1.49375	0.110468	-13.5221	1.15871e-41	8.47321e-41	ENSG00000186594	MIR22HG
7344.22	-2.00479	0.14827	-13.5212	1.17177e-41	8.56413e-41	ENSG00000160883	HK3
529.112	-0.52653	0.0389465	-13.5193	1.20271e-41	8.78559e-41	ENSG00000136240	KDELR2
151.577	-1.59944	0.118356	-13.5138	1.29596e-41	9.46167e-41	ENSG00000161643	SIGLEC16
404.603	-0.515707	0.0381623	-13.5135	1.30146e-41	9.49677e-41	ENSG00000129636	ITFG1
26.3918	-2.04471	0.151322	-13.5123	1.32311e-41	9.64961e-41	ENSG00000123342	MMP19
1193.55	-0.819856	0.0606766	-13.5119	1.33025e-41	9.6965e-41	ENSG00000101220	C20orf27
93.2142	-1.79181	0.132616	-13.5112	1.34231e-41	9.77921e-41	ENSG00000111110	PPM1H
158.625	0.453146	0.0335444	13.5088	1.38674e-41	1.00975e-40	ENSG00000096654	ZNF184
2957.05	0.648298	0.0479957	13.5074	1.41359e-41	1.02875e-40	ENSG00000165661	QSOX2
663.339	1.0856	0.0803785	13.5061	1.44023e-41	1.04758e-40	ENSG00000277030	MIR8071-2
3109.71	-2.10875	0.156144	-13.5052	1.45714e-41	1.05894e-40	ENSG00000221869	CEBPD
601.85	-2.30169	0.17043	-13.5052	1.4574e-41	1.05894e-40	ENSG00000250510	GPR162
236.014	0.721389	0.0534189	13.5044	1.47356e-41	1.07011e-40	ENSG00000161328	LRRC56
48.4104	0.668506	0.0495121	13.5019	1.52458e-41	1.10658e-40	ENSG00000103494	RPGRIP1L
1889.08	-1.1094	0.0822065	-13.4952	1.66834e-41	1.21028e-40	ENSG00000070614	NDST1
3287.26	-0.843617	0.062515	-13.4946	1.68182e-41	1.21941e-40	ENSG00000197956	S100A6
324.777	0.61061	0.0452696	13.4883	1.83303e-41	1.32834e-40	ENSG00000197372	ZNF675
138.159	-0.935707	0.0693781	-13.4871	1.8636e-41	1.34977e-40	ENSG00000132122	SPATA6
219.758	0.506904	0.0375946	13.4834	1.95839e-41	1.41768e-40	ENSG00000078319	PMS2P1
888.251	-0.657204	0.0487471	-13.4819	1.9986e-41	1.44583e-40	ENSG00000069849	ATP1B3
1990.77	-0.418892	0.0310708	-13.4819	1.99939e-41	1.44583e-40	ENSG00000166987	MBD6
96.9183	-1.10275	0.0817973	-13.4815	2.01014e-41	1.45283e-40	ENSG00000143079	CTTNBP2NL
1364.7	-1.56792	0.116316	-13.4799	2.05507e-41	1.48452e-40	ENSG00000157557	ETS2
30.8193	-2.02398	0.15021	-13.4743	2.21626e-41	1.60011e-40	ENSG00000267551	GNA15-DT
30.2251	-2.59034	0.192255	-13.4734	2.24271e-41	1.61835e-40	ENSG00000259717	LINC00677
677.729	-1.59136	0.118127	-13.4717	2.29672e-41	1.65645e-40	ENSG00000091106	NLRC4
280.196	-1.08424	0.0804924	-13.4701	2.34617e-41	1.69122e-40	ENSG00000196358	NTNG2
1376.9	-0.378282	0.0280842	-13.4696	2.36259e-41	1.70216e-40	ENSG00000102882	MAPK3
28.3019	-1.58299	0.117525	-13.4694	2.36768e-41	1.70493e-40	ENSG00000130222	GADD45G
4843.1	-0.293421	0.0217862	-13.4682	2.40681e-41	1.73219e-40	ENSG00000175727	MLXIP
183.537	1.13474	0.0842612	13.4669	2.44951e-41	1.76199e-40	ENSG00000160683	CXCR5
80.1004	0.465757	0.0345855	13.4668	2.4521e-41	1.76293e-40	ENSG00000121988	ZRANB3
297.23	-1.98413	0.147338	-13.4665	2.46234e-41	1.7688e-40	ENSG00000099139	PCSK5
177.452	-1.67591	0.124451	-13.4665	2.46286e-41	1.7688e-40	ENSG00000159714	ZDHHC1
129.306	-2.17572	0.161583	-13.465	2.51317e-41	1.80399e-40	ENSG00000175294	CATSPER1
129.277	0.706758	0.0524899	13.4646	2.52513e-41	1.81162e-40	ENSG00000198039	ZNF273
1989.53	-1.85721	0.137936	-13.4644	2.53495e-41	1.81771e-40	ENSG00000171777	RASGRP4
1637.57	-0.673691	0.050038	-13.4636	2.5618e-41	1.836e-40	ENSG00000040933	INPP4A
34979.7	-2.26394	0.168154	-13.4635	2.56353e-41	1.83628e-40	ENSG00000038427	VCAN
1104.77	0.400771	0.0297726	13.4611	2.65009e-41	1.89729e-40	ENSG00000160190	SLC37A1
3301	0.47357	0.0351813	13.4608	2.65907e-41	1.90272e-40	ENSG00000110367	DDX6
399.382	0.764663	0.0568125	13.4594	2.71031e-41	1.93837e-40	ENSG00000111674	ENO2
533.378	-0.429846	0.0319512	-13.4532	2.9483e-41	2.10747e-40	ENSG00000129255	MPDU1
1934.72	-2.13577	0.158772	-13.4518	3.00518e-41	2.14701e-40	ENSG00000170909	OSCAR
2814.83	0.774822	0.0576218	13.4467	3.21977e-41	2.29911e-40	ENSG00000159753	CARMIL2
3550.58	-0.486883	0.0362088	-13.4465	3.22626e-41	2.30255e-40	ENSG00000010810	FYN
2147.11	-0.338747	0.0251927	-13.4462	3.24044e-41	2.31146e-40	ENSG00000092847	AGO1
4281.73	-2.30449	0.171389	-13.446	3.25138e-41	2.31805e-40	ENSG00000135218	CD36
29.8862	0.997445	0.0741842	13.4455	3.27095e-41	2.33079e-40	ENSG00000124557	BTN1A1
782.935	-0.394431	0.0293386	-13.4441	3.33479e-41	2.37504e-40	ENSG00000111237	VPS29
3448.69	-0.359059	0.0267154	-13.4401	3.51808e-41	2.50427e-40	ENSG00000123329	ARHGAP9
748.829	-0.867179	0.0645218	-13.4401	3.52029e-41	2.50454e-40	ENSG00000127946	HIP1
106.395	-2.14534	0.159649	-13.4378	3.63092e-41	2.5819e-40	ENSG00000187037	GPR141
30.8691	-1.51504	0.112752	-13.4368	3.67835e-41	2.61427e-40	ENSG00000223401	NA
36.1619	-1.64979	0.122782	-13.4368	3.68038e-41	2.61435e-40	ENSG00000254667	NA
270.957	0.420035	0.0312605	13.4366	3.68842e-41	2.6187e-40	ENSG00000143971	ETAA1
52.5749	0.74482	0.0554742	13.4264	4.23413e-41	3.00458e-40	ENSG00000167550	RHEBL1
332.996	-2.01133	0.149893	-13.4184	4.71578e-41	3.34463e-40	ENSG00000164403	SHROOM1
397.739	-0.884336	0.0659073	-13.4179	4.75093e-41	3.36781e-40	ENSG00000112419	PHACTR2
335.168	0.604203	0.0450326	13.417	4.80761e-41	3.40622e-40	ENSG00000107815	TWNK
2561.09	0.769877	0.0573836	13.4163	4.85156e-41	3.43558e-40	ENSG00000083454	P2RX5
2503.92	-0.556942	0.0415128	-13.4161	4.86422e-41	3.44276e-40	ENSG00000168003	SLC3A2
1563.93	-2.04595	0.152504	-13.4157	4.89477e-41	3.46259e-40	ENSG00000101307	SIRPB1
4126	-0.238334	0.0177679	-13.4138	5.02271e-41	3.55125e-40	ENSG00000213676	ATF6B
2957.82	0.808764	0.0602948	13.4135	5.04031e-41	3.56186e-40	ENSG00000137101	CD72
989.673	-0.45654	0.0340375	-13.4129	5.08359e-41	3.59058e-40	ENSG00000141012	GALNS
602.153	-1.68655	0.125744	-13.4126	5.10393e-41	3.60309e-40	ENSG00000152229	PSTPIP2
252.854	-1.80786	0.134789	-13.4125	5.10691e-41	3.60332e-40	ENSG00000267519	MIR23AHG
196.121	-1.00316	0.0747989	-13.4115	5.17993e-41	3.65296e-40	ENSG00000112759	SLC29A1
157.268	-1.79841	0.134096	-13.4113	5.19053e-41	3.65855e-40	ENSG00000204136	GGTA1
782.331	-0.396232	0.0295476	-13.4099	5.28895e-41	3.726e-40	ENSG00000090054	SPTLC1
1214.49	-0.425149	0.0317072	-13.4086	5.38384e-41	3.79089e-40	ENSG00000143418	CERS2
7059.1	-1.73537	0.129437	-13.4071	5.49366e-41	3.86622e-40	ENSG00000163563	MNDA
364.873	1.24937	0.0931973	13.4056	5.60591e-41	3.94319e-40	ENSG00000211938	IGHV3-7
621.76	-0.777837	0.0580269	-13.4048	5.66922e-41	3.98567e-40	ENSG00000064547	LPAR2
457.874	-1.69666	0.126608	-13.4008	5.97939e-41	4.20157e-40	ENSG00000153885	KCTD15
917.758	-0.845918	0.0631404	-13.3974	6.26131e-41	4.39741e-40	ENSG00000106560	GIMAP2
34.1302	-1.57256	0.117383	-13.3969	6.30352e-41	4.42477e-40	ENSG00000079482	OPHN1
189.214	-1.88639	0.140819	-13.3958	6.39555e-41	4.48707e-40	ENSG00000019991	HGF
6433.38	-1.79153	0.133739	-13.3957	6.40527e-41	4.49158e-40	ENSG00000135046	ANXA1
270.007	-0.979959	0.073172	-13.3925	6.68575e-41	4.68585e-40	ENSG00000111452	ADGRD1
1944.67	0.293814	0.0219418	13.3906	6.85962e-41	4.80283e-40	ENSG00000108389	MTMR4
748.152	-0.288387	0.0215365	-13.3906	6.85967e-41	4.80283e-40	ENSG00000163156	SCNM1
100.491	0.503519	0.0376069	13.389	7.01027e-41	4.90575e-40	ENSG00000176055	MBLAC2
394.009	1.10924	0.08285	13.3885	7.06136e-41	4.93746e-40	ENSG00000211651	IGLV1-44
750.798	-1.78901	0.133624	-13.3885	7.06281e-41	4.93746e-40	ENSG00000120318	ARAP3
11804.7	-0.339649	0.02537	-13.3878	7.12166e-41	4.97605e-40	ENSG00000136286	MYO1G
270.915	-0.596477	0.0445617	-13.3854	7.35926e-41	5.13944e-40	ENSG00000127220	ABHD8
546.259	-1.46934	0.109795	-13.3826	7.64248e-41	5.3345e-40	ENSG00000198876	DCAF12
2418.07	0.271155	0.0202644	13.3808	7.82634e-41	5.46005e-40	ENSG00000131323	TRAF3
187.253	0.489342	0.036573	13.3799	7.92889e-41	5.52877e-40	ENSG00000198346	ZNF813
619.897	-0.353649	0.0264315	-13.3798	7.9346e-41	5.52993e-40	ENSG00000167193	CRK
325.788	-0.797316	0.059597	-13.3784	8.08163e-41	5.62953e-40	ENSG00000198814	GK
2303.85	-1.07683	0.0804933	-13.3779	8.14125e-41	5.66817e-40	ENSG00000096060	FKBP5
13586.4	-0.531322	0.0397222	-13.3759	8.35812e-41	5.8162e-40	ENSG00000140575	IQGAP1
5466.6	-0.389051	0.0290898	-13.3741	8.56653e-41	5.95819e-40	ENSG00000089639	GMIP
1281.57	-0.420795	0.0314655	-13.3732	8.67235e-41	6.02872e-40	ENSG00000118217	ATF6
3765.46	-1.14737	0.085802	-13.3723	8.78062e-41	6.10088e-40	ENSG00000110876	SELPLG
1648.63	-1.10268	0.0824615	-13.3721	8.8025e-41	6.11297e-40	ENSG00000112303	VNN2
5223.34	0.299615	0.022407	13.3715	8.87319e-41	6.15893e-40	ENSG00000148700	ADD3
515.089	0.594336	0.0444522	13.3702	9.02873e-41	6.26371e-40	ENSG00000035115	SH3YL1
26.1034	-1.80466	0.135009	-13.3669	9.43485e-41	6.54213e-40	ENSG00000162390	ACOT11
331.584	-1.82119	0.13625	-13.3665	9.48731e-41	6.57517e-40	ENSG00000116574	RHOU
392.179	-0.80032	0.0598769	-13.3661	9.54285e-41	6.61031e-40	ENSG00000276231	PIK3R6
12197.3	0.323433	0.0241988	13.3657	9.59651e-41	6.64412e-40	ENSG00000111913	RIPOR2
880.351	-0.488014	0.0365128	-13.3656	9.60954e-41	6.64976e-40	ENSG00000143207	COP1
99.0978	0.719998	0.0538702	13.3654	9.62772e-41	6.65897e-40	ENSG00000138193	PLCE1
862.619	-0.489982	0.0366657	-13.3635	9.87964e-41	6.82975e-40	ENSG00000147533	GOLGA7
2776.71	0.419474	0.0313925	13.3622	1.00513e-40	6.94487e-40	ENSG00000160293	VAV2
245.275	0.455109	0.0340657	13.3597	1.03958e-40	7.17934e-40	ENSG00000163281	GNPDA2
599.486	0.693877	0.0519411	13.3589	1.0505e-40	7.25106e-40	ENSG00000214900	LINC01588
387.735	0.324811	0.0243145	13.3587	1.05318e-40	7.26588e-40	ENSG00000149474	KAT14
474.406	0.458034	0.0342883	13.3583	1.05912e-40	7.30315e-40	ENSG00000196670	ZFP62
365.704	-0.580748	0.0434857	-13.3549	1.10857e-40	7.64026e-40	ENSG00000157326	DHRS4
1358.99	-2.05082	0.153586	-13.3529	1.1393e-40	7.84814e-40	ENSG00000162711	NLRP3
2415.42	-2.06271	0.15448	-13.3526	1.14348e-40	7.87175e-40	ENSG00000120594	PLXDC2
271.972	-1.68006	0.125823	-13.3526	1.14388e-40	7.87175e-40	ENSG00000122547	EEPD1
5381.31	-0.570856	0.0427622	-13.3495	1.1918e-40	8.19738e-40	ENSG00000111144	LTA4H
2525.99	0.971817	0.0728016	13.3488	1.20317e-40	8.27139e-40	ENSG00000110987	BCL7A
839.398	0.321969	0.0241282	13.344	1.28298e-40	8.81562e-40	ENSG00000127804	METTL16
4143.97	-1.11904	0.083889	-13.3396	1.36227e-40	9.35576e-40	ENSG00000196154	S100A4
368.628	-0.759817	0.0569738	-13.3363	1.42438e-40	9.77739e-40	ENSG00000137767	SQOR
1524.09	-0.576814	0.0432532	-13.3357	1.43409e-40	9.83909e-40	ENSG00000122705	CLTA
340.476	0.779034	0.0584323	13.3323	1.50281e-40	1.03054e-39	ENSG00000173715	C11orf80
358.361	0.684162	0.0513262	13.3297	1.55514e-40	1.06589e-39	ENSG00000175414	ARL10
95.583	1.0889	0.0817069	13.3269	1.61501e-40	1.10637e-39	ENSG00000123096	SSPN
9824.95	-0.373279	0.0280133	-13.325	1.65574e-40	1.1337e-39	ENSG00000152291	TGOLN2
1581.35	-0.845358	0.0634448	-13.3243	1.67187e-40	1.14417e-39	ENSG00000113916	BCL6
4492.33	-1.01497	0.076193	-13.3211	1.746e-40	1.19431e-39	ENSG00000112096	SOD2
364.377	0.483787	0.0363226	13.3192	1.79057e-40	1.22418e-39	ENSG00000188070	ZFTA
55.7274	0.995159	0.0747357	13.3157	1.87565e-40	1.28171e-39	ENSG00000226571	NA
[truncated: 11,661 more rows]

## Sheet: SupTable_S3
GOBP	name	nAnno	nOverlap	fc	zscore	pvalue	adjp	or	CIl	CIu	directionBcell_IL7
GO:0008589	regulation of smoothened signaling pathway	12	12	2.35	4.02	0	0	Inf	3.75	Inf	correlated
GO:0006351	transcription, DNA-templated	1332	749	1.32	10.7	1.2e-26	7.5e-24	1.85	1.65	2.08	correlated
GO:0006355	regulation of transcription, DNA-templated	970	556	1.35	9.66	2.9e-22	1.2e-19	1.91	1.67	2.18	correlated
GO:0019083	viral transcription	107	90	1.97	8.72	9.2e-20	2.9e-17	7.24	4.27	13	correlated
GO:0006958	complement activation, classical pathway	88	77	2.05	8.55	1.8e-19	4.6e-17	9.56	5.05	20	correlated
GO:0006364	rRNA processing	196	142	1.7	8.52	3.9e-18	8.2e-16	3.61	2.62	5.05	correlated
GO:0000184	nuclear-transcribed mRNA catabolic process, nonsense-mediated decay	115	92	1.88	8.15	3.3e-17	5.2e-15	5.47	3.43	9.06	correlated
GO:0006614	SRP-dependent cotranslational protein targeting to membrane	90	76	1.98	8.06	3.1e-17	5.2e-15	7.41	4.15	14.2	correlated
GO:0050871	positive regulation of B cell activation	39	37	2.23	6.61	1.8e-13	2.4e-11	25.1	6.47	214	correlated
GO:0006910	phagocytosis, recognition	40	37	2.17	6.39	2.1e-12	2.6e-10	16.7	5.29	84.8	correlated
GO:0002377	immunoglobulin production	29	28	2.27	5.88	1.7e-11	2e-09	37.9	6.27	1540	correlated
GO:0006956	complement activation	58	48	1.94	6.2	5.2e-11	5.4e-09	6.52	3.25	14.5	correlated
GO:0050853	B cell receptor signaling pathway	64	51	1.87	6.02	2.4e-10	2.4e-08	5.33	2.85	10.7	correlated
GO:0006911	phagocytosis, engulfment	45	37	1.93	5.38	8.4e-09	7.5e-07	6.27	2.87	15.6	correlated
GO:0006413	translational initiation	129	86	1.56	5.56	9.3e-09	7.8e-07	2.72	1.86	4.03	correlated
GO:0006412	translation	159	100	1.48	5.21	7.3e-08	5.7e-06	2.31	1.65	3.25	correlated
GO:0051301	cell division	269	154	1.34	4.91	3.9e-07	2.9e-05	1.83	1.42	2.36	correlated
GO:0007062	sister chromatid cohesion	89	60	1.58	4.75	6.4e-07	4.2e-05	2.81	1.77	4.55	correlated
GO:0035735	intraciliary transport involved in cilium assembly	36	29	1.89	4.61	6e-07	4.2e-05	5.61	2.4	15.2	correlated
GO:0006334	nucleosome assembly	30	24	1.88	4.15	5.5e-06	0.00034	5.41	2.15	16.2	correlated
GO:0036297	interstrand cross-link repair	41	30	1.72	3.97	1.8e-05	0.0011	3.69	1.8	8.17	correlated
GO:0006281	DNA repair	180	103	1.34	4	2.6e-05	0.0014	1.82	1.34	2.48	correlated
GO:0030490	maturation of SSU-rRNA	16	14	2.05	3.63	2.6e-05	0.0014	9.45	2.17	85.9	correlated
GO:0000027	ribosomal large subunit assembly	16	14	2.05	3.63	2.6e-05	0.0014	9.45	2.17	85.9	correlated
GO:0006955	immune response	260	142	1.28	3.96	3.2e-05	0.0016	1.64	1.27	2.12	correlated
GO:0050776	regulation of immune response	128	76	1.39	3.86	4.4e-05	0.002	1.98	1.37	2.88	correlated
GO:0006270	DNA replication initiation	27	21	1.83	3.7	4.1e-05	0.002	4.73	1.85	14.3	correlated
GO:0006298	mismatch repair	28	21	1.76	3.47	0.00011	0.0051	4.05	1.66	11.3	correlated
GO:0032508	DNA duplex unwinding	40	28	1.64	3.51	0.00012	0.0053	3.16	1.55	6.82	correlated
GO:0006541	glutamine metabolic process	14	12	2.01	3.26	0.00013	0.0053	8.1	1.8	74.4	correlated
GO:0090399	replicative senescence	10	9	2.11	3.03	0.0002	0.0074	12.1	1.68	531	correlated
GO:0019731	antibacterial humoral response	10	9	2.11	3.03	0.0002	0.0074	12.1	1.68	531	correlated
GO:0031571	mitotic G1 DNA damage checkpoint	10	9	2.11	3.03	0.0002	0.0074	12.1	1.68	531	correlated
GO:0007052	mitotic spindle organization	27	20	1.74	3.31	0.00021	0.0079	3.86	1.57	10.8	correlated
GO:0042100	B cell proliferation	13	11	1.99	3.07	0.00028	0.01	7.42	1.62	69.1	correlated
GO:0034142	toll-like receptor 4 signaling pathway	11	11	2.45	3.99	0	0	Inf	3.64	Inf	anti-correlated
GO:0043312	neutrophil degranulation	422	318	1.84	14.7	3.1e-49	2.2e-46	4.66	3.71	5.89	anti-correlated
GO:0002479	antigen processing and presentation of exogenous peptide antigen via MHC class I, TAP-dependent	72	60	2.04	7.35	1.8e-14	8.4e-12	7.31	3.89	14.9	anti-correlated
GO:0006954	inflammatory response	219	136	1.52	6.45	5.5e-11	2e-08	2.41	1.82	3.21	anti-correlated
GO:0061024	membrane organization	199	122	1.5	5.91	1.6e-09	4.5e-07	2.33	1.73	3.14	anti-correlated
GO:0006886	intracellular protein transport	176	109	1.52	5.73	4.6e-09	1.1e-06	2.38	1.74	3.29	anti-correlated
GO:0033209	tumor necrosis factor-mediated signaling pathway	105	71	1.65	5.6	7.8e-09	1.6e-06	3.05	2	4.74	anti-correlated
GO:0006521	regulation of cellular amino acid metabolic process	48	38	1.94	5.41	1.1e-08	2.1e-06	5.53	2.7	12.5	anti-correlated
GO:0016241	regulation of macroautophagy	39	32	2.01	5.24	2.3e-08	3.6e-06	6.65	2.88	17.9	anti-correlated
GO:0000165	MAPK cascade	184	111	1.48	5.41	2.8e-08	4.1e-06	2.23	1.64	3.04	anti-correlated
GO:0060337	type I interferon signaling pathway	49	38	1.9	5.23	3.4e-08	4.4e-06	5.03	2.52	10.9	anti-correlated
GO:0061418	regulation of transcription from RNA polymerase II promoter in response to hypoxia	68	49	1.76	5.25	4.4e-08	5.3e-06	3.76	2.17	6.77	anti-correlated
GO:0055114	oxidation-reduction process	375	203	1.32	5.31	5.5e-08	6.1e-06	1.74	1.41	2.15	anti-correlated
GO:0015992	proton transport	32	27	2.06	5.01	6.1e-08	6.3e-06	7.85	2.98	26.1	anti-correlated
GO:0007165	signal transduction	646	327	1.24	5.18	1.1e-07	1e-05	1.52	1.29	1.78	anti-correlated
GO:0002576	platelet degranulation	80	55	1.68	5.09	1.2e-07	1e-05	3.21	1.96	5.38	anti-correlated
GO:0006928	movement of cell or subcellular component	64	46	1.76	5.06	1.2e-07	1e-05	3.72	2.11	6.83	anti-correlated
GO:0006888	ER to Golgi vesicle-mediated transport	137	85	1.52	5.07	1.7e-07	1.3e-05	2.39	1.67	3.45	anti-correlated
GO:0051607	defense response to virus	120	76	1.55	5.03	2e-07	1.4e-05	2.52	1.71	3.75	anti-correlated
GO:0002223	stimulatory C-type lectin receptor signaling pathway	103	67	1.59	5.01	2e-07	1.4e-05	2.72	1.78	4.2	anti-correlated
GO:0022617	extracellular matrix disassembly	36	29	1.97	4.85	2e-07	1.4e-05	6.02	2.58	16.3	anti-correlated
GO:0060071	Wnt signaling pathway, planar cell polarity pathway	80	54	1.65	4.86	4e-07	2.6e-05	3.03	1.86	5.04	anti-correlated
GO:0008360	regulation of cell shape	97	63	1.59	4.84	4.8e-07	3e-05	2.7	1.75	4.24	anti-correlated
GO:0038061	NIK/NF-kappaB signaling	65	45	1.69	4.66	9.7e-07	5.8e-05	3.28	1.89	5.86	anti-correlated
GO:0090263	positive regulation of canonical Wnt signaling pathway	86	56	1.59	4.59	1.6e-06	9.2e-05	2.72	1.71	4.4	anti-correlated
GO:0006897	endocytosis	94	60	1.56	4.55	2e-06	0.00011	2.57	1.66	4.05	anti-correlated
GO:0000302	response to reactive oxygen species	30	24	1.96	4.37	2.2e-06	0.00012	5.81	2.31	17.4	anti-correlated
GO:0043154	negative regulation of cysteine-type endopeptidase activity involved in apoptotic process	47	34	1.77	4.4	2.9e-06	0.00015	3.8	1.95	7.86	anti-correlated
GO:0010972	negative regulation of G2/M transition of mitotic cell cycle	56	39	1.7	4.39	3.4e-06	0.00016	3.34	1.84	6.3	anti-correlated
GO:0098869	cellular oxidant detoxification	42	31	1.81	4.35	3.4e-06	0.00016	4.1	2	9.04	anti-correlated
GO:0006915	apoptotic process	406	209	1.26	4.42	4.6e-06	0.00021	1.56	1.27	1.91	anti-correlated
GO:0043547	positive regulation of GTPase activity	405	208	1.26	4.37	5.9e-06	0.00026	1.55	1.27	1.9	anti-correlated
GO:0008333	endosome to lysosome transport	36	27	1.84	4.17	7.1e-06	0.0003	4.36	1.99	10.5	anti-correlated
GO:0061025	membrane fusion	31	24	1.89	4.15	7e-06	0.0003	4.98	2.08	13.7	anti-correlated
GO:0046718	viral entry into host cell	59	40	1.66	4.22	7.9e-06	0.00031	3.06	1.73	5.61	anti-correlated
GO:0048013	ephrin receptor signaling pathway	59	40	1.66	4.22	7.9e-06	0.00031	3.06	1.73	5.61	anti-correlated
GO:0032722	positive regulation of chemokine production	13	12	2.26	3.77	8.8e-06	0.00034	17.4	2.57	742	anti-correlated
GO:0055085	transmembrane transport	161	92	1.4	4.23	1e-05	0.00038	1.95	1.41	2.71	anti-correlated
GO:0031146	SCF-dependent proteasomal ubiquitin-dependent protein catabolic process	65	43	1.62	4.16	1.1e-05	0.0004	2.84	1.66	5	anti-correlated
GO:1902042	negative regulation of extrinsic apoptotic signaling pathway via death domain receptors	25	20	1.96	3.98	1.2e-05	0.00043	5.81	2.11	19.8	anti-correlated
GO:0051897	positive regulation of protein kinase B signaling	49	34	1.7	4.07	1.4e-05	0.00049	3.3	1.75	6.52	anti-correlated
GO:0031663	lipopolysaccharide-mediated signaling pathway	27	21	1.9	3.91	1.9e-05	0.00063	5.08	1.98	15.4	anti-correlated
GO:0033572	transferrin transport	27	21	1.9	3.91	1.9e-05	0.00063	5.08	1.98	15.4	anti-correlated
GO:0010951	negative regulation of endopeptidase activity	46	32	1.7	3.97	2.1e-05	0.00069	3.32	1.72	6.75	anti-correlated
GO:1990126	retrograde transport, endosome to plasma membrane	12	11	2.24	3.58	2.2e-05	0.00069	15.9	2.32	684	anti-correlated
GO:0032496	response to lipopolysaccharide	99	60	1.48	4.01	2.3e-05	0.00071	2.24	1.47	3.45	anti-correlated
GO:0071260	cellular response to mechanical stimulus	57	38	1.63	3.97	2.3e-05	0.00071	2.91	1.63	5.35	anti-correlated
GO:0006629	lipid metabolic process	78	49	1.54	3.96	2.8e-05	0.00083	2.46	1.52	4.04	anti-correlated
GO:0019882	antigen processing and presentation	21	17	1.98	3.74	3.1e-05	0.0009	6.17	2.01	25.2	anti-correlated
GO:0001934	positive regulation of protein phosphorylation	94	57	1.48	3.91	3.5e-05	0.00099	2.24	1.46	3.5	anti-correlated
GO:0016197	endosomal transport	54	36	1.63	3.87	3.6e-05	0.001	2.91	1.61	5.45	anti-correlated
GO:1901215	negative regulation of neuron death	31	23	1.82	3.78	3.8e-05	0.001	4.17	1.8	10.8	anti-correlated
GO:0043407	negative regulation of MAP kinase activity	26	20	1.88	3.74	3.8e-05	0.001	4.84	1.87	14.7	anti-correlated
GO:0006464	cellular protein modification process	73	46	1.54	3.86	4e-05	0.0011	2.48	1.51	4.15	anti-correlated
GO:0045454	cell redox homeostasis	60	39	1.59	3.81	4.6e-05	0.0012	2.7	1.55	4.84	anti-correlated
GO:0070374	positive regulation of ERK1 and ERK2 cascade	87	53	1.49	3.82	5.1e-05	0.0013	2.27	1.45	3.61	anti-correlated
GO:0006914	autophagy	95	57	1.47	3.81	5.4e-05	0.0013	2.18	1.42	3.39	anti-correlated
GO:0030036	actin cytoskeleton organization	95	57	1.47	3.81	5.4e-05	0.0013	2.18	1.42	3.39	anti-correlated
GO:0006098	pentose-phosphate shunt	11	10	2.22	3.38	5.3e-05	0.0013	14.5	2.06	627	anti-correlated
GO:0036109	alpha-linolenic acid metabolic process	11	10	2.22	3.38	5.3e-05	0.0013	14.5	2.06	627	anti-correlated
GO:0090383	phagosome acidification	20	16	1.96	3.56	6.5e-05	0.0015	5.8	1.87	23.9	anti-correlated
GO:0030335	positive regulation of cell migration	110	64	1.42	3.71	8.2e-05	0.0018	2.03	1.36	3.03	anti-correlated
GO:0048208	COPII vesicle coating	59	38	1.58	3.69	7.7e-05	0.0018	2.63	1.5	4.72	anti-correlated
GO:0050718	positive regulation of interleukin-1 beta secretion	17	14	2.02	3.48	7.6e-05	0.0018	6.77	1.89	36.7	anti-correlated
GO:0043161	proteasome-mediated ubiquitin-dependent protein catabolic process	185	100	1.32	3.68	0.0001	0.0022	1.72	1.27	2.33	anti-correlated
GO:0006979	response to oxidative stress	75	46	1.5	3.62	0.00011	0.0023	2.31	1.42	3.81	anti-correlated
GO:0097352	autophagosome maturation	27	20	1.81	3.51	0.0001	0.0023	4.15	1.68	11.6	anti-correlated
GO:1902476	chloride transmembrane transport	34	24	1.73	3.53	0.00011	0.0024	3.48	1.6	8.17	anti-correlated
GO:0016236	macroautophagy	89	53	1.46	3.6	0.00012	0.0025	2.14	1.37	3.37	anti-correlated
GO:0034220	ion transmembrane transport	97	57	1.44	3.6	0.00012	0.0025	2.07	1.36	3.2	anti-correlated
GO:0006812	cation transport	10	9	2.2	3.16	0.00013	0.0025	13	1.81	570	anti-correlated
GO:0010591	regulation of lamellipodium assembly	10	9	2.2	3.16	0.00013	0.0025	13	1.81	570	anti-correlated
GO:0006878	cellular copper ion homeostasis	10	9	2.2	3.16	0.00013	0.0025	13	1.81	570	anti-correlated
GO:0033540	fatty acid beta-oxidation using acyl-CoA oxidase	10	9	2.2	3.16	0.00013	0.0025	13	1.81	570	anti-correlated
GO:0030041	actin filament polymerization	19	15	1.93	3.38	0.00014	0.0026	5.44	1.73	22.5	anti-correlated
GO:0006935	chemotaxis	64	40	1.53	3.53	0.00015	0.0027	2.42	1.42	4.21	anti-correlated
GO:0050728	negative regulation of inflammatory response	47	31	1.61	3.51	0.00014	0.0027	2.81	1.49	5.52	anti-correlated
GO:0071456	cellular response to hypoxia	66	41	1.52	3.52	0.00015	0.0028	2.38	1.41	4.1	anti-correlated
GO:0051436	negative regulation of ubiquitin-protein ligase activity involved in mitotic cell cycle	68	42	1.51	3.52	0.00016	0.0028	2.35	1.4	4	anti-correlated
GO:0006909	phagocytosis	38	26	1.67	3.46	0.00016	0.0028	3.15	1.53	6.85	anti-correlated
GO:0034446	substrate adhesion-dependent cell spreading	24	18	1.84	3.41	0.00015	0.0028	4.35	1.65	13.4	anti-correlated
GO:0006953	acute-phase response	16	13	1.99	3.29	0.00017	0.0028	6.28	1.73	34.4	anti-correlated
GO:0019915	lipid storage	13	11	2.07	3.21	0.00017	0.0028	7.97	1.74	73.9	anti-correlated
GO:0035987	endodermal cell differentiation	13	11	2.07	3.21	0.00017	0.0028	7.97	1.74	73.9	anti-correlated
GO:0006622	protein targeting to lysosome	13	11	2.07	3.21	0.00017	0.0028	7.97	1.74	73.9	anti-correlated
GO:0045861	negative regulation of proteolysis	13	11	2.07	3.21	0.00017	0.0028	7.97	1.74	73.9	anti-correlated
GO:0019369	arachidonic acid metabolic process	13	11	2.07	3.21	0.00017	0.0028	7.97	1.74	73.9	anti-correlated
GO:0032148	activation of protein kinase B activity	13	11	2.07	3.21	0.00017	0.0028	7.97	1.74	73.9	anti-correlated
GO:0007596	blood coagulation	94	55	1.43	3.49	0.00018	0.003	2.05	1.33	3.18	anti-correlated
GO:0043123	positive regulation of I-kappaB kinase/NF-kappaB signaling	135	75	1.36	3.49	0.0002	0.0031	1.82	1.28	2.61	anti-correlated
GO:0000209	protein polyubiquitination	192	102	1.3	3.48	0.00021	0.0033	1.65	1.23	2.23	anti-correlated
GO:0015031	protein transport	283	144	1.25	3.47	0.00023	0.0036	1.51	1.19	1.93	anti-correlated
GO:0071407	cellular response to organic cyclic compound	35	24	1.68	3.34	0.00024	0.0037	3.17	1.49	7.17	anti-correlated
GO:0036258	multivesicular body assembly	28	20	1.75	3.29	0.00026	0.0039	3.63	1.53	9.53	anti-correlated
GO:0009615	response to virus	83	49	1.44	3.38	0.00027	0.0041	2.1	1.32	3.35	anti-correlated
GO:0010575	positive regulation of vascular endothelial growth factor production	18	14	1.9	3.19	0.00028	0.0041	5.08	1.59	21.2	anti-correlated
GO:0015991	ATP hydrolysis coupled proton transport	18	14	1.9	3.19	0.00028	0.0041	5.08	1.59	21.2	anti-correlated
GO:0035307	positive regulation of protein dephosphorylation	18	14	1.9	3.19	0.00028	0.0041	5.08	1.59	21.2	anti-correlated
GO:0033138	positive regulation of peptidyl-serine phosphorylation	54	34	1.54	3.31	0.00032	0.0046	2.47	1.38	4.53	anti-correlated
GO:0032755	positive regulation of interleukin-6 production	30	21	1.71	3.25	0.00031	0.0046	3.39	1.49	8.41	anti-correlated
GO:0019221	cytokine-mediated signaling pathway	58	36	1.52	3.29	0.00035	0.0049	2.38	1.36	4.25	anti-correlated
GO:0098609	cell-cell adhesion	15	12	1.96	3.09	0.00036	0.005	5.8	1.56	32	anti-correlated
GO:0045087	innate immune response	292	147	1.23	3.33	0.00038	0.0053	1.48	1.17	1.88	anti-correlated
GO:0034614	cellular response to reactive oxygen species	25	18	1.76	3.17	0.00038	0.0053	3.73	1.49	10.6	anti-correlated
GO:0045773	positive regulation of axon extension	25	18	1.76	3.17	0.00038	0.0053	3.73	1.49	10.6	anti-correlated
GO:0050771	negative regulation of axonogenesis	12	10	2.04	2.99	0.0004	0.0053	7.25	1.54	68.2	anti-correlated
GO:0042346	positive regulation of NF-kappaB import into nucleus	12	10	2.04	2.99	0.0004	0.0053	7.25	1.54	68.2	anti-correlated
GO:2001240	negative regulation of extrinsic apoptotic signaling pathway in absence of ligand	20	15	1.84	3.11	0.00042	0.0056	4.35	1.5	15.3	anti-correlated
GO:0050731	positive regulation of peptidyl-tyrosine phosphorylation	49	31	1.55	3.2	0.00047	0.0061	2.5	1.35	4.75	anti-correlated
GO:0043066	negative regulation of apoptotic process	311	155	1.22	3.26	0.00049	0.0064	1.45	1.15	1.83	anti-correlated
GO:0001525	angiogenesis	126	69	1.34	3.19	0.00058	0.0075	1.76	1.22	2.55	anti-correlated
GO:0051453	regulation of intracellular pH	17	13	1.87	2.99	0.00058	0.0075	4.71	1.45	19.8	anti-correlated
GO:0007166	cell surface receptor signaling pathway	143	77	1.32	3.18	0.00062	0.0078	1.7	1.2	2.4	anti-correlated
GO:0016192	vesicle-mediated transport	81	47	1.42	3.15	0.00061	0.0078	2.01	1.26	3.23	anti-correlated
GO:0071363	cellular response to growth factor stimulus	31	21	1.66	3.05	0.00067	0.0083	3.05	1.37	7.25	anti-correlated
GO:0070527	platelet aggregation	31	21	1.66	3.05	0.00067	0.0083	3.05	1.37	7.25	anti-correlated
GO:0006936	muscle contraction	46	29	1.54	3.07	0.00072	0.0088	2.48	1.31	4.81	anti-correlated
GO:0032760	positive regulation of tumor necrosis factor production	33	22	1.63	3.02	0.00076	0.0088	2.9	1.35	6.63	anti-correlated
GO:0051603	proteolysis involved in cellular protein catabolic process	24	17	1.73	2.99	0.00073	0.0088	3.52	1.39	10.1	anti-correlated
GO:0031668	cellular response to extracellular stimulus	14	11	1.92	2.87	0.00076	0.0088	5.31	1.4	29.7	anti-correlated
GO:0048488	synaptic vesicle endocytosis	14	11	1.92	2.87	0.00076	0.0088	5.31	1.4	29.7	anti-correlated
GO:0010592	positive regulation of lamellipodium assembly	14	11	1.92	2.87	0.00076	0.0088	5.31	1.4	29.7	anti-correlated
GO:0070266	necroptotic process	14	11	1.92	2.87	0.00076	0.0088	5.31	1.4	29.7	anti-correlated
GO:0098655	cation transmembrane transport	14	11	1.92	2.87	0.00076	0.0088	5.31	1.4	29.7	anti-correlated
GO:2000778	positive regulation of interleukin-6 secretion	14	11	1.92	2.87	0.00076	0.0088	5.31	1.4	29.7	anti-correlated
GO:0007267	cell-cell signaling	84	48	1.4	3.05	0.00089	0.0094	1.94	1.23	3.08	anti-correlated
GO:0042147	retrograde transport, endosome to Golgi	60	36	1.47	3.02	0.0009	0.0094	2.18	1.26	3.82	anti-correlated
GO:0006687	glycosphingolipid metabolic process	35	23	1.61	2.99	0.00084	0.0094	2.78	1.33	6.14	anti-correlated
GO:0000186	activation of MAPKK activity	35	23	1.61	2.99	0.00084	0.0094	2.78	1.33	6.14	anti-correlated
GO:0032757	positive regulation of interleukin-8 production	19	14	1.8	2.91	0.00083	0.0094	4.06	1.38	14.4	anti-correlated
GO:0007193	adenylate cyclase-inhibiting G-protein coupled receptor signaling pathway	19	14	1.8	2.91	0.00083	0.0094	4.06	1.38	14.4	anti-correlated
GO:0010719	negative regulation of epithelial to mesenchymal transition	11	9	2	2.76	0.00089	0.0094	6.52	1.35	62.1	anti-correlated
GO:0032495	response to muramyl dipeptide	11	9	2	2.76	0.00089	0.0094	6.52	1.35	62.1	anti-correlated
GO:0045776	negative regulation of blood pressure	11	9	2	2.76	0.00089	0.0094	6.52	1.35	62.1	anti-correlated
GO:0050832	defense response to fungus	11	9	2	2.76	0.00089	0.0094	6.52	1.35	62.1	anti-correlated
GO:0002028	regulation of sodium ion transport	11	9	2	2.76	0.00089	0.0094	6.52	1.35	62.1	anti-correlated
GO:2000484	positive regulation of interleukin-8 secretion	11	9	2	2.76	0.00089	0.0094	6.52	1.35	62.1	anti-correlated
GO:0005975	carbohydrate metabolic process	74	43	1.42	3.03	0.00092	0.0095	2.02	1.24	3.31	anti-correlated
GO:0030433	ER-associated ubiquitin-dependent protein catabolic process	64	38	1.45	3.02	0.00092	0.0095	2.12	1.25	3.65	anti-correlated
GO:0051437	positive regulation of ubiquitin-protein ligase activity involved in regulation of mitotic cell cycle transition	72	42	1.43	3.02	0.00093	0.0095	2.03	1.24	3.37	anti-correlated
GO:0090090	negative regulation of canonical Wnt signaling pathway	109	60	1.35	3.03	0.00099	0.01	1.78	1.2	2.66	anti-correlated
GO:0002474	antigen processing and presentation of peptide antigen via MHC class I	28	19	1.66	2.91	0.001	0.01	3.06	1.32	7.69	anti-correlated
GO:0030100	regulation of endocytosis	28	19	1.66	2.91	0.001	0.01	3.06	1.32	7.69	anti-correlated

## Sheet: SupTable_S4
baseMean	log2FoldChange	lfcSE	stat	pvalue	padj	ENSG.gene	Gene
158.965	1.87165	0.223222	8.38468	5.08643e-17	7.75476e-13	ENSG00000211802	TRAV22
29.3081	1.43608	0.188464	7.61989	2.5389e-14	1.31623e-10	ENSG00000167693	NXN
219.55	1.20795	0.158579	7.61732	2.58998e-14	1.31623e-10	ENSG00000183091	NEB
141.509	1.61315	0.216513	7.45058	9.29319e-14	3.5421e-10	ENSG00000211803	TRAV23DV6
36.5766	-1.46889	0.22043	-6.66374	2.66939e-11	8.1395e-08	ENSG00000263417	GTSCR1
40.8717	1.88955	0.307305	6.14877	7.80839e-10	1.98411e-06	ENSG00000253291	TRBV7-7
213.384	-1.16538	0.198733	-5.86407	4.51666e-09	9.83728e-06	ENSG00000278195	SSTR3
30.3614	-1.79828	0.315009	-5.70867	1.1386e-08	2.12945e-05	ENSG00000050555	LAMC3
314.397	-1.06228	0.186634	-5.6918	1.25705e-08	2.12945e-05	ENSG00000198478	SH3BGRL2
200.086	1.37226	0.245611	5.58712	2.30871e-08	3.51986e-05	ENSG00000211727	TRBV7-6
9042.73	0.377351	0.0680447	5.54564	2.92886e-08	4.05941e-05	ENSG00000101445	PPP1R16B
2907.04	-0.820206	0.148693	-5.51608	3.46636e-08	4.40401e-05	ENSG00000072110	ACTN1
175.839	0.870012	0.158801	5.47862	4.28652e-08	5.0271e-05	ENSG00000116285	ERRFI1
33.2581	-0.569976	0.104557	-5.45136	4.99852e-08	5.44338e-05	ENSG00000151164	RAD9B
32.4648	-1.92169	0.355136	-5.41112	6.26307e-08	6.36578e-05	ENSG00000268555	NA
152.42	-0.955505	0.180737	-5.28672	1.24532e-07	0.000118663	ENSG00000092096	SLC22A17
107.381	-1.16141	0.220569	-5.26551	1.398e-07	0.000125376	ENSG00000135960	EDAR
59.2108	-0.780513	0.148959	-5.23978	1.60772e-07	0.000136174	ENSG00000162373	BEND5
78.1948	0.751508	0.143759	5.22754	1.7178e-07	0.00013784	ENSG00000171595	DNAI2
6275.58	0.166787	0.0319736	5.21638	1.82454e-07	0.000139085	ENSG00000103365	GGA2
3761.24	-0.8458	0.163084	-5.18627	2.14546e-07	0.000155761	ENSG00000126353	CCR7
5301.73	0.410182	0.0794663	5.1617	2.44711e-07	0.000169585	ENSG00000100221	JOSD1
29.828	-1.45309	0.282853	-5.13728	2.78751e-07	0.000179772	ENSG00000182489	XKRX
529.199	-1.01932	0.198526	-5.13443	2.82994e-07	0.000179772	ENSG00000182871	COL18A1
165.143	1.33712	0.26246	5.09455	3.49579e-07	0.000195513	ENSG00000131459	GFPT2
49.6987	-0.430592	0.0845826	-5.09079	3.56573e-07	0.000195513	ENSG00000280739	EIF1B-AS1
113.233	1.04778	0.205827	5.09059	3.56947e-07	0.000195513	ENSG00000143153	ATP1B1
6346.44	0.52933	0.104005	5.08947	3.59069e-07	0.000195513	ENSG00000057657	PRDM1
103.24	1.0257	0.202212	5.07239	3.92842e-07	0.000206526	ENSG00000049247	UTS2
5187.28	0.229175	0.0453068	5.05829	4.23029e-07	0.000214983	ENSG00000166848	TERF2IP
532.392	0.392417	0.0777476	5.04732	4.48062e-07	0.00022036	ENSG00000223482	NUTM2A-AS1
3853	0.439062	0.0875782	5.01337	5.34846e-07	0.000254821	ENSG00000051108	HERPUD1
50.99	1.81477	0.362953	5	5.733e-07	0.000264865	ENSG00000211720	TRBV11-1
898.496	0.746438	0.150415	4.96253	6.95796e-07	0.000312003	ENSG00000057704	TMCC3
139.915	-0.829925	0.168069	-4.93799	7.89305e-07	0.000343821	ENSG00000172915	NBEA
45.4331	0.990386	0.201903	4.90525	9.33072e-07	0.000395156	ENSG00000179455	MKRN3
350.832	-0.988508	0.202909	-4.87167	1.1066e-06	0.00045598	ENSG00000116983	HPCAL4
266.311	0.478557	0.0985705	4.85498	1.20401e-06	0.000464072	ENSG00000189420	ZFP92
750.214	-0.386777	0.0796798	-4.85413	1.20914e-06	0.000464072	ENSG00000143653	SCCPDH
1519.78	-1.82388	0.375843	-4.85276	1.21756e-06	0.000464072	ENSG00000225630	MTND2P28
260.788	-0.791712	0.163924	-4.82974	1.36712e-06	0.000505056	ENSG00000181690	PLAG1
67.7825	-0.920422	0.190712	-4.82624	1.39134e-06	0.000505056	ENSG00000258511	LINC02295
167.977	-1.0124	0.210608	-4.80705	1.53175e-06	0.000543094	ENSG00000281106	TMEM272
535.606	0.501589	0.105052	4.77467	1.79999e-06	0.000623697	ENSG00000151062	CACNA2D4
4183.88	0.440847	0.0925383	4.76394	1.89848e-06	0.000643205	ENSG00000027869	SH2D2A
50.9143	-1.44412	0.304099	-4.74884	2.04585e-06	0.000678066	ENSG00000238241	CCR12P
847.526	-0.39621	0.0835649	-4.74134	2.12308e-06	0.00068869	ENSG00000149084	HSD17B12
166.027	-0.8931	0.18891	-4.72764	2.27147e-06	0.000721476	ENSG00000118513	MYB
264.021	1.26813	0.268946	4.7152	2.41477e-06	0.000727115	ENSG00000182272	B4GALNT4
441.418	-0.664618	0.141056	-4.71173	2.45624e-06	0.000727115	ENSG00000099139	PCSK5
115.036	-1.43628	0.304881	-4.71096	2.46553e-06	0.000727115	ENSG00000120057	SFRP5
352.252	1.53264	0.325666	4.70618	2.52404e-06	0.000727115	ENSG00000211898	IGHD
30.3696	-1.06363	0.226021	-4.70588	2.52769e-06	0.000727115	ENSG00000204055	NA
212.677	-0.634252	0.13503	-4.69714	2.63831e-06	0.00073903	ENSG00000187824	TMEM220
2991.96	0.519224	0.110591	4.695	2.66605e-06	0.00073903	ENSG00000158321	AUTS2
348.481	0.320952	0.0686544	4.67489	2.9411e-06	0.000800714	ENSG00000196150	ZNF250
3811.56	0.433451	0.0928593	4.66782	3.0441e-06	0.000814216	ENSG00000139112	GABARAPL1
26.8103	-1.46915	0.315423	-4.65773	3.19718e-06	0.000825289	ENSG00000198046	ZNF667
34.5026	-0.670677	0.144014	-4.65702	3.20822e-06	0.000825289	ENSG00000184361	SPATA32
102.584	-1.00397	0.215699	-4.65449	3.24789e-06	0.000825289	ENSG00000182983	ZNF662
2454.29	0.209877	0.0452346	4.63974	3.48841e-06	0.000871874	ENSG00000178234	GALNT11
38.4308	1.16448	0.253198	4.59908	4.24355e-06	0.00102831	ENSG00000183873	SCN5A
62.5094	-1.20629	0.262305	-4.5988	4.24922e-06	0.00102831	ENSG00000271447	MMP28
30.3048	-1.24657	0.271916	-4.58438	4.55326e-06	0.00108467	ENSG00000107249	GLIS3
134.829	-0.472222	0.103099	-4.58028	4.64357e-06	0.00108917	ENSG00000204934	ATP6V0E2-AS1
1143.4	0.396896	0.0870026	4.56188	5.06972e-06	0.00117111	ENSG00000141540	TTYH2
38.5609	-0.942606	0.207362	-4.54571	5.47505e-06	0.00124586	ENSG00000214140	PRCD
74.6517	0.453043	0.0997331	4.54256	5.5576e-06	0.00124605	ENSG00000273311	DGCR11
116.444	-0.897197	0.198001	-4.53128	5.86263e-06	0.00129539	ENSG00000172985	SH3RF3
68.7992	-0.742027	0.163985	-4.52497	6.0404e-06	0.0013156	ENSG00000205464	ATP6AP1L
165.5	-0.292579	0.0647561	-4.51816	6.2378e-06	0.00133946	ENSG00000180425	C11orf71
2656.93	0.388157	0.0860463	4.51103	6.4514e-06	0.00134792	ENSG00000165650	PDZD8
133.393	-0.684948	0.151842	-4.51094	6.45403e-06	0.00134792	ENSG00000152894	PTPRK
28.9983	-0.869455	0.192975	-4.50553	6.62071e-06	0.00136405	ENSG00000134716	CYP2J2
139.802	-0.783874	0.174237	-4.4989	6.83062e-06	0.00138853	ENSG00000149970	CNKSR2
85.703	-1.47074	0.328435	-4.47802	7.53391e-06	0.00149979	ENSG00000279942	NA
28.1529	-0.95778	0.21394	-4.47687	7.57469e-06	0.00149979	ENSG00000057019	DCBLD2
135.429	-0.470941	0.105377	-4.46912	7.85428e-06	0.00153521	ENSG00000236778	INTS6-AS1
3098.05	0.208582	0.0468461	4.45249	8.48818e-06	0.00163811	ENSG00000085978	ATG16L1
185.211	-1.13545	0.255595	-4.44238	8.89692e-06	0.00169553	ENSG00000233695	GAS6-AS1
78.8424	-0.486941	0.110072	-4.42383	9.69663e-06	0.00182512	ENSG00000106686	SPATA6L
7892.78	0.330681	0.0748834	4.41594	1.00571e-05	0.00186989	ENSG00000186716	BCR
6531.17	-0.51245	0.116542	-4.39714	1.09687e-05	0.00200399	ENSG00000138795	LEF1
124.733	1.07522	0.244608	4.39571	1.10413e-05	0.00200399	ENSG00000211784	TRAV10
71.6386	-0.723278	0.164767	-4.3897	1.1351e-05	0.00201459	ENSG00000136929	HEMGN
25.1853	-1.05169	0.239739	-4.38681	1.15024e-05	0.00201459	ENSG00000278318	ZNF229
2904.82	0.20934	0.047763	4.3829	1.17112e-05	0.00201459	ENSG00000265491	RNF115
1089.51	0.266612	0.0608375	4.38237	1.17396e-05	0.00201459	ENSG00000140365	COMMD4
117.919	-0.643643	0.146884	-4.38198	1.17604e-05	0.00201459	ENSG00000267128	RNF157-AS1
303.322	0.450776	0.102958	4.37826	1.19632e-05	0.00202656	ENSG00000137101	CD72
723.168	0.195511	0.0447278	4.37114	1.23601e-05	0.0020708	ENSG00000158158	CNNM4
4836.66	-0.360964	0.0826723	-4.3662	1.26429e-05	0.00209515	ENSG00000147457	CHMP7
3461.72	0.346818	0.0794934	4.36285	1.28378e-05	0.00210458	ENSG00000178573	MAF
216.739	-0.355915	0.0816269	-4.36026	1.29906e-05	0.00210697	ENSG00000280734	LINC01232
33.4017	-2.46435	0.566115	-4.3531	1.34226e-05	0.00215412	ENSG00000133063	CHIT1
94.04	-0.770992	0.177599	-4.34119	1.41715e-05	0.00225061	ENSG00000006638	TBXA2R
7265.08	0.308684	0.071207	4.33502	1.45747e-05	0.00229078	ENSG00000086062	B4GALT1
60.9502	-1.88843	0.436521	-4.3261	1.51774e-05	0.00236117	ENSG00000158578	ALAS2
557.961	-0.364959	0.0847659	-4.30549	1.66615e-05	0.00256587	ENSG00000136153	LMO7
198.235	-1.21562	0.282996	-4.29554	1.7427e-05	0.00265691	ENSG00000091129	NRCAM
6229.52	0.439647	0.102463	4.2908	1.78027e-05	0.00268733	ENSG00000067840	PDZD4
34.754	-0.896235	0.209128	-4.28557	1.82268e-05	0.00272438	ENSG00000227508	LINC01624
48.4904	-1.44572	0.338672	-4.26879	1.96532e-05	0.00290906	ENSG00000158966	CACHD1
664.412	-0.729189	0.171267	-4.25762	2.06617e-05	0.0030028	ENSG00000146904	EPHA1
91.7753	-0.475198	0.111617	-4.25742	2.06804e-05	0.0030028	ENSG00000231205	ZNF826P
3896.2	0.184641	0.043483	4.24628	2.17353e-05	0.00312619	ENSG00000109689	STIM2
1449.58	0.262826	0.0620165	4.23799	2.25527e-05	0.00321161	ENSG00000169155	ZBTB43
26.7399	-1.22993	0.29035	-4.23603	2.27505e-05	0.00321161	ENSG00000127955	GNAI1
3006.92	0.122461	0.0289918	4.22398	2.4002e-05	0.0033572	ENSG00000124228	DDX27
80.3464	-0.953245	0.226129	-4.21549	2.4924e-05	0.00342666	ENSG00000211818	TRAV39
16025.4	0.483503	0.114703	4.21527	2.49482e-05	0.00342666	ENSG00000145675	PIK3R1
75.6126	-0.634934	0.151136	-4.20106	2.65664e-05	0.00361635	ENSG00000140807	NKD1
1376.91	-0.195279	0.0465454	-4.19545	2.7233e-05	0.00367429	ENSG00000243943	ZNF512
126.788	-0.718088	0.171501	-4.18708	2.8256e-05	0.00377887	ENSG00000141447	OSBPL1A
1340.03	0.250689	0.0599061	4.1847	2.85547e-05	0.00378561	ENSG00000177426	TGIF1
1330.12	0.77367	0.185799	4.16402	3.12696e-05	0.00410979	ENSG00000000971	CFH
19780.9	0.261219	0.0630334	4.14414	3.41094e-05	0.00444471	ENSG00000182162	P2RY8
106.905	-0.987316	0.23848	-4.14004	3.47251e-05	0.00444859	ENSG00000261150	EPPK1
43.5768	1.72442	0.416605	4.13922	3.48493e-05	0.00444859	ENSG00000105538	RASIP1
773.897	1.64631	0.39798	4.13667	3.52381e-05	0.00444859	ENSG00000080573	COL5A3
6937.32	0.498808	0.120595	4.13623	3.53063e-05	0.00444859	ENSG00000167851	CD300A
251.509	-0.632787	0.153205	-4.13033	3.62237e-05	0.00452677	ENSG00000166681	BEX3
68.6015	-0.89057	0.216296	-4.11736	3.83234e-05	0.00472662	ENSG00000211815	TRAV36DV7
1088.72	0.234569	0.0569977	4.11541	3.86492e-05	0.00472662	ENSG00000164402	SEPTIN8
168.476	-0.663256	0.161188	-4.11479	3.8753e-05	0.00472662	ENSG00000156510	HKDC1
547.209	0.266758	0.0650693	4.09961	4.13854e-05	0.00500763	ENSG00000231259	ANAPC1P2
5309.25	0.193864	0.0473228	4.09663	4.19206e-05	0.00503246	ENSG00000055483	USP36
130.399	-0.880677	0.215229	-4.09182	4.28004e-05	0.00506344	ENSG00000075340	ADD2
101.755	-1.19225	0.291391	-4.09159	4.2843e-05	0.00506344	ENSG00000167880	EVPL
360.685	-0.52009	0.127276	-4.0863	4.38301e-05	0.00514026	ENSG00000173530	TNFRSF10D
196.411	0.665087	0.163261	4.07377	4.62583e-05	0.00538152	ENSG00000260708	TBC1D22A-DT
146.797	-0.664468	0.163176	-4.07209	4.65933e-05	0.00538152	ENSG00000179855	GIPC3
625.721	0.919736	0.226331	4.06367	4.83061e-05	0.00553283	ENSG00000196169	KIF19
86.6593	-0.864225	0.212765	-4.06187	4.86807e-05	0.00553283	ENSG00000155970	MICU3
1841.16	0.219477	0.0540642	4.05957	4.91634e-05	0.00553283	ENSG00000065308	TRAM2
190.65	-0.833743	0.205477	-4.05759	4.95822e-05	0.00553283	ENSG00000232208	NA
494.47	0.278606	0.0686738	4.05695	4.97178e-05	0.00553283	ENSG00000115526	CHST10
348.789	-0.469954	0.115932	-4.05372	5.04097e-05	0.00556918	ENSG00000135069	PSAT1
34456.6	0.348477	0.0860561	4.04942	5.13457e-05	0.00557637	ENSG00000020633	RUNX3
170.708	-1.11622	0.275703	-4.04861	5.15224e-05	0.00557637	ENSG00000211782	TRAV8-1
69.4715	-0.755926	0.186723	-4.04839	5.15721e-05	0.00557637	ENSG00000169902	TPST1
738.114	-0.207334	0.0512742	-4.04362	5.26312e-05	0.00565081	ENSG00000085415	SEH1L
3793.53	-0.428186	0.105941	-4.04175	5.3053e-05	0.00565626	ENSG00000186854	TRABD2A
2387.05	0.447163	0.11095	4.03031	5.5704e-05	0.00589766	ENSG00000146425	DYNLT1
995.168	0.292425	0.072589	4.0285	5.61339e-05	0.00590218	ENSG00000163597	SNHG16
1194.15	0.590966	0.147581	4.00436	6.21862e-05	0.00642792	ENSG00000170525	PFKFB3
4193.42	0.267951	0.0669277	4.00359	6.23883e-05	0.00642792	ENSG00000110046	ATG2A
94.744	-0.798057	0.199337	-4.00355	6.23988e-05	0.00642792	ENSG00000232021	LEF1-AS1
12642.8	0.205707	0.0514046	4.00171	6.28856e-05	0.00643459	ENSG00000141506	PIK3R5
1725.06	0.317378	0.0794264	3.99587	6.44561e-05	0.00655131	ENSG00000070495	JMJD6
40.7576	-1.25774	0.315259	-3.98955	6.61992e-05	0.00668393	ENSG00000169855	ROBO1
33.9844	-0.92099	0.231221	-3.98315	6.80066e-05	0.00682124	ENSG00000129204	USP6
1475.14	-0.337193	0.0846982	-3.98111	6.85935e-05	0.00683514	ENSG00000152256	PDK1
553.391	-0.77971	0.19598	-3.97852	6.93469e-05	0.00686535	ENSG00000174807	CD248
32175.6	0.168808	0.0425204	3.97005	7.18569e-05	0.00702963	ENSG00000169926	KLF13
298.389	-0.240178	0.060501	-3.96981	7.19285e-05	0.00702963	ENSG00000143353	LYPLAL1
29.314	-0.51064	0.128681	-3.96825	7.24029e-05	0.00703092	ENSG00000186340	THBS2
111.967	-1.17152	0.295815	-3.9603	7.48544e-05	0.00711522	ENSG00000168497	CAVIN2
943.162	-0.272532	0.0688219	-3.95996	7.49628e-05	0.00711522	ENSG00000168675	LDLRAD4
992.11	0.539727	0.136321	3.95924	7.51895e-05	0.00711522	ENSG00000211694	TRGV10
2407.72	0.388252	0.0980869	3.95824	7.55026e-05	0.00711522	ENSG00000134285	FKBP11
6617.56	0.211198	0.0533608	3.95792	7.56044e-05	0.00711522	ENSG00000141002	TCF25
24.5297	-0.958298	0.24225	-3.95581	7.62743e-05	0.00713422	ENSG00000225632	NA
88.4437	-1.01286	0.256237	-3.95282	7.7236e-05	0.00718012	ENSG00000070018	LRP6
4379.69	-0.24499	0.0621545	-3.94162	8.09315e-05	0.00747807	ENSG00000106560	GIMAP2
5201.42	0.226202	0.057589	3.92786	8.57042e-05	0.00787137	ENSG00000224470	ATXN1L
26.152	-1.00679	0.256541	-3.92449	8.69122e-05	0.00793451	ENSG00000131831	RAI2
191.197	-0.7965	0.203033	-3.92302	8.74477e-05	0.00793588	ENSG00000197093	GAL3ST4
769.34	-0.849228	0.216623	-3.92031	8.84356e-05	0.00797804	ENSG00000245954	LINC02273
113.917	-0.464676	0.118707	-3.91446	9.06061e-05	0.00812577	ENSG00000204745	LOC102724642
2177.6	0.167396	0.0428052	3.91065	9.205e-05	0.00820698	ENSG00000168763	CNNM3
109.777	0.650648	0.166595	3.90557	9.40048e-05	0.00833254	ENSG00000204991	SPIRE2
59.8936	-0.851344	0.218652	-3.89361	9.87647e-05	0.00870385	ENSG00000226423	NA
2143.75	0.576091	0.148505	3.87926	0.000104774	0.00918036	ENSG00000157985	AGAP1
10942.5	0.565429	0.14589	3.87571	0.000106315	0.00926217	ENSG00000075426	FOSL2
263.856	-0.645849	0.166902	-3.86964	0.000108998	0.00943388	ENSG00000180573	H2AC6
2723.16	0.298126	0.0770658	3.86846	0.000109524	0.00943388	ENSG00000140030	GPR65
4455.56	0.394539	0.1021	3.86422	0.000111444	0.00950656	ENSG00000164674	SYTL3
664.741	-1.38287	0.3579	-3.86385	0.000111615	0.00950656	ENSG00000160307	S100B
665.34	0.243607	0.0630848	3.86158	0.000112654	0.00952714	ENSG00000171132	PRKCE
208.572	-0.464082	0.12021	-3.86061	0.000113106	0.00952714	ENSG00000135519	KCNH3
1114.76	0.153549	0.0398802	3.85026	0.000117995	0.00983897	ENSG00000198874	TYW1
88.8581	0.443986	0.115339	3.84941	0.000118403	0.00983897	ENSG00000258512	LINC00239
1977.67	0.49162	0.127736	3.8487	0.000118744	0.00983897	ENSG00000103257	SLC7A5
143.136	-0.550873	0.143397	-3.84159	0.000122239	0.0100738	ENSG00000100600	LGMN
1522.06	0.147899	0.038546	3.83696	0.000124569	0.0102106	ENSG00000159792	PSKH1
198.772	-0.320906	0.083753	-3.83158	0.000127324	0.0103225	ENSG00000248508	SRP14-DT
247.326	-0.787054	0.205418	-3.83148	0.000127375	0.0103225	ENSG00000047634	SCML1
3154.06	0.643051	0.167883	3.83034	0.000127965	0.0103225	ENSG00000179094	PER1
1392.8	-0.789698	0.206403	-3.826	0.000130243	0.010451	ENSG00000100346	CACNA1I
742.791	0.176326	0.0461829	3.81799	0.000134541	0.0107149	ENSG00000085433	WDR47
155.391	-0.855743	0.224177	-3.81727	0.000134938	0.0107149	ENSG00000112394	SLC16A10
824.616	-1.04635	0.274246	-3.81537	0.00013598	0.0107417	ENSG00000137959	IFI44L
2886.26	0.187136	0.0491006	3.81128	0.00013825	0.0108578	ENSG00000100426	ZBED4
163.301	-0.428855	0.112555	-3.81016	0.000138875	0.0108578	ENSG00000188343	CIBAR1
264.702	-0.618083	0.162661	-3.79982	0.000144801	0.0112635	ENSG00000169047	IRS1
88.2322	-1.09451	0.288216	-3.79752	0.00014615	0.0113107	ENSG00000204110	LINC02520
92.6481	-1.28504	0.338706	-3.79398	0.000148252	0.0114154	ENSG00000163993	S100P
2325.44	-0.15087	0.0398675	-3.78429	0.000154146	0.0118096	ENSG00000196591	HDAC2
21699.1	0.215049	0.0568621	3.78195	0.000155606	0.0118478	ENSG00000078304	PPP2R5C
31.0371	0.551025	0.145735	3.781	0.000156199	0.0118478	ENSG00000138131	LOXL4
1808.65	0.128012	0.0339366	3.77209	0.000161884	0.0121274	ENSG00000108591	DRG2
1705.37	0.450104	0.119325	3.77207	0.000161898	0.0121274	ENSG00000026652	AGPAT4
113.526	0.445389	0.118093	3.7715	0.000162271	0.0121274	ENSG00000145949	MYLK4
3809.74	0.13	0.0345064	3.7674	0.000164955	0.0122148	ENSG00000089094	KDM2B
38.9778	-0.796893	0.211531	-3.76727	0.000165043	0.0122148	ENSG00000124225	PMEPA1
261.874	0.239762	0.0637755	3.75947	0.000170273	0.012541	ENSG00000165113	GKAP1
190.375	-0.459634	0.122367	-3.75619	0.000172519	0.0126453	ENSG00000088899	LZTS3
2427.93	0.453176	0.120736	3.75345	0.000174416	0.0126947	ENSG00000196814	MVB12B
39.5886	-0.433991	0.115686	-3.75146	0.000175805	0.0126947	ENSG00000271971	NA
273.638	-0.674785	0.179914	-3.75061	0.000176405	0.0126947	ENSG00000204219	TCEA3
47.6576	-1.21809	0.324786	-3.75044	0.000176524	0.0126947	ENSG00000227920	NA
70.5148	-0.432655	0.115534	-3.74482	0.000180525	0.0129215	ENSG00000225234	TRAPPC12-AS1
1549.3	0.23472	0.0627416	3.74107	0.000183241	0.0130475	ENSG00000181026	AEN
873.089	0.164248	0.0439256	3.73923	0.000184582	0.0130475	ENSG00000101442	ACTR5
73.3164	-0.772791	0.206691	-3.73887	0.000184853	0.0130475	ENSG00000262714	NA
31.5003	0.499515	0.133745	3.73482	0.000187849	0.0131236	ENSG00000232053	NA
2155.65	0.40636	0.108826	3.73403	0.000188439	0.0131236	ENSG00000115604	IL18R1
56.4162	-1.39588	0.373835	-3.73393	0.000188514	0.0131236	ENSG00000104918	RETN
837.645	-0.306588	0.0824684	-3.71764	0.000201093	0.0139358	ENSG00000136108	CKAP2
7096.33	0.14478	0.0389738	3.71481	0.000203359	0.014029	ENSG00000141551	CSNK1D
62.0302	-0.711362	0.191681	-3.71117	0.000206304	0.0141681	ENSG00000233850	NA
144.038	-0.719239	0.194011	-3.70722	0.000209549	0.0143264	ENSG00000277301	LOC101929698
123.692	-0.970436	0.262089	-3.70269	0.000213326	0.0145195	ENSG00000111863	ADTRP
743.995	-0.441041	0.11926	-3.69814	0.000217186	0.0146895	ENSG00000120915	EPHX2
3447.1	0.249169	0.0674139	3.69611	0.00021893	0.0146895	ENSG00000165943	MOAP1
2978.52	-0.154372	0.0417759	-3.69525	0.00021967	0.0146895	ENSG00000106144	CASP2
60.5472	0.51409	0.139122	3.69524	0.000219678	0.0146895	ENSG00000168811	IL12A
1949.06	-0.151404	0.0409947	-3.69325	0.000221407	0.0147405	ENSG00000124164	VAPB
381.68	-0.330942	0.0896846	-3.69007	0.000224193	0.0147548	ENSG00000266947	NA
15784.5	0.716126	0.194087	3.68972	0.000224505	0.0147548	ENSG00000118503	TNFAIP3
36.914	-0.876575	0.237574	-3.68969	0.000224525	0.0147548	ENSG00000173809	TDRD12
61.5612	-0.602144	0.16373	-3.67766	0.000235382	0.0154019	ENSG00000117519	CNN3
149.806	0.407333	0.110852	3.67455	0.000238267	0.0154894	ENSG00000186352	ANKRD37
377.167	0.652934	0.177746	3.67342	0.000239327	0.0154894	ENSG00000050730	TNIP3
42.4165	0.459007	0.125018	3.67153	0.000241101	0.0154894	ENSG00000182327	GLTPD2
204.879	-0.614279	0.167333	-3.671	0.000241599	0.0154894	ENSG00000145911	N4BP3
1225.28	0.215603	0.0587348	3.67079	0.0002418	0.0154894	ENSG00000156502	SUPV3L1
329.427	-0.72477	0.197699	-3.66603	0.000246342	0.0157144	ENSG00000205810	KLRC3
316.842	0.208216	0.056817	3.66469	0.000247642	0.0157315	ENSG00000020426	MNAT1
2000.08	0.119336	0.0325844	3.66237	0.000249888	0.0158083	ENSG00000011295	TTC19
26.4555	-1.02908	0.281168	-3.66002	0.0002522	0.0158848	ENSG00000196263	ZNF471
225.167	0.198753	0.054322	3.65879	0.000253412	0.0158848	ENSG00000254505	CHMP4A
197.506	0.297089	0.081217	3.65797	0.000254223	0.0158848	ENSG00000157833	GAREM2
32.6705	0.635828	0.173911	3.65605	0.000256136	0.015939	ENSG00000235558	GUSBP17
40.1651	-1.02149	0.279554	-3.654	0.000258183	0.0160011	ENSG00000138741	TRPC3
4687.7	-0.173539	0.0475388	-3.65048	0.000261755	0.0161568	ENSG00000136450	SRSF1
115.346	-0.334406	0.0916668	-3.64806	0.000264233	0.01624	ENSG00000235217	TSPY26P
2675.17	0.320683	0.0879392	3.64665	0.000265682	0.01624	ENSG00000134215	VAV3
41.7496	-0.789607	0.216569	-3.64599	0.000266366	0.01624	ENSG00000280027	NA
1585.55	0.224545	0.0616032	3.64503	0.000267365	0.01624	ENSG00000198912	C1orf174
35.8915	-0.562056	0.154384	-3.64065	0.000271954	0.0164321	ENSG00000188107	EYS
3531.89	0.393064	0.108008	3.63922	0.000273468	0.0164321	ENSG00000150347	ARID5B
153.237	-0.791204	0.217427	-3.63894	0.000273761	0.0164321	ENSG00000229153	EPHA1-AS1
34.5117	-0.819394	0.225515	-3.63344	0.000279672	0.0166879	ENSG00000078900	TP73
445.143	-0.46555	0.128147	-3.63294	0.000280212	0.0166879	ENSG00000134709	HOOK1
7029.75	0.258301	0.07115	3.63037	0.000283012	0.0167891	ENSG00000164574	GALNT10
2402.91	-0.410049	0.113017	-3.6282	0.000285404	0.0168654	ENSG00000141576	RNF157
2028.12	0.198842	0.054848	3.62532	0.000288605	0.0169887	ENSG00000198792	TMEM184B
31.7287	-0.906119	0.250046	-3.62381	0.000290298	0.0170226	ENSG00000257495	KRT73-AS1
83.0272	0.544481	0.150296	3.62271	0.000291532	0.0170295	ENSG00000230701	FBXW4P1
216.472	-0.515573	0.142382	-3.62106	0.0002934	0.0170732	ENSG00000283050	GTF2IP12
655.426	-0.164124	0.0453375	-3.62005	0.000294542	0.0170745	ENSG00000124786	SLC35B3
1817.18	-0.135026	0.0373703	-3.61319	0.000302457	0.0174323	ENSG00000131844	MCCC2
34.3152	-1.34252	0.371609	-3.61272	0.000303002	0.0174323	ENSG00000161681	SHANK1
109.958	-0.283491	0.0785099	-3.61089	0.000305148	0.0174898	ENSG00000257698	GIHCG
235.72	-0.585254	0.162178	-3.60872	0.000307714	0.0175086	ENSG00000166851	PLK1
4783.22	0.225392	0.0624585	3.60867	0.000307772	0.0175086	ENSG00000153815	CMIP
234.961	-0.841699	0.233793	-3.60019	0.000317989	0.0180225	ENSG00000134765	DSC1
6092.38	0.221006	0.0614492	3.59657	0.000322436	0.0181527	ENSG00000116604	MEF2D
1417.35	-0.393931	0.109607	-3.59403	0.000325604	0.0181527	ENSG00000128050	PAICS
4433.56	0.247157	0.0687739	3.59376	0.000325944	0.0181527	ENSG00000141458	NPC1
1695.32	-0.384795	0.107074	-3.59374	0.000325969	0.0181527	ENSG00000172578	KLHL6
2812.57	-0.434879	0.121017	-3.59352	0.000326239	0.0181527	ENSG00000134352	IL6ST
167.62	-0.983602	0.274253	-3.58648	0.000335167	0.0185817	ENSG00000183691	NOG
49.8928	-0.509108	0.142005	-3.58514	0.000336897	0.0186099	ENSG00000270223	NA
229.728	-0.581978	0.162587	-3.57948	0.000344277	0.0189489	ENSG00000197928	ZNF677
595.977	-0.312614	0.087434	-3.57542	0.000349664	0.0191762	ENSG00000155957	TMBIM4
319.04	-0.449336	0.125774	-3.57256	0.000353508	0.0193175	ENSG00000173890	GPR160
124.393	-0.677466	0.189773	-3.56988	0.000357151	0.019423	ENSG00000183087	GAS6
8540.77	0.354206	0.0992498	3.56883	0.000358572	0.019423	ENSG00000185697	MYBL1
331.281	-0.73713	0.206575	-3.56833	0.000359261	0.019423	ENSG00000185745	IFIT1
59.7673	-0.552914	0.155143	-3.5639	0.00036539	0.0196846	ENSG00000215105	TTC3P1
2353.27	0.893732	0.251186	3.55805	0.000373615	0.0200568	ENSG00000171617	ENC1
8349.4	0.195301	0.0549343	3.55517	0.000377738	0.0201472	ENSG00000100422	CERK
294.358	-0.527013	0.148244	-3.55503	0.000377941	0.0201472	ENSG00000173848	NET1
1010.86	0.178727	0.0503535	3.54945	0.000386032	0.0205068	ENSG00000040199	PHLPP2
7524.62	0.225768	0.0636388	3.54764	0.000388701	0.0205768	ENSG00000115165	CYTIP
116.849	0.945828	0.26702	3.54216	0.000396867	0.0209364	ENSG00000162692	VCAM1
31.8243	-0.678549	0.191638	-3.54079	0.000398937	0.0209397	ENSG00000126947	ARMCX1
30.9799	-0.638831	0.180446	-3.5403	0.000399676	0.0209397	ENSG00000136960	ENPP2
6765.02	0.182128	0.0515479	3.53318	0.000410599	0.0214383	ENSG00000120071	KANSL1
445.549	0.206462	0.0584537	3.53206	0.000412341	0.0214558	ENSG00000103404	USP31
738.597	-0.137405	0.0389463	-3.52807	0.000418606	0.0217077	ENSG00000175782	SLC35E3
424.6	0.234691	0.0666151	3.52309	0.000426547	0.0219891	ENSG00000134470	IL15RA
110.661	-0.349875	0.0993157	-3.52286	0.000426916	0.0219891	ENSG00000225205	NA
3036.17	0.461005	0.130955	3.52032	0.00043103	0.0221214	ENSG00000275302	CCL4
4016.28	-0.217252	0.0617284	-3.51948	0.000432388	0.0221214	ENSG00000094916	CBX5
381.97	0.265903	0.0756052	3.51699	0.000436473	0.0222557	ENSG00000103472	RRN3P2
11330.4	0.157608	0.0448769	3.51201	0.000444731	0.0225189	ENSG00000008513	ST3GAL1
936.239	-0.376712	0.107279	-3.51153	0.000445534	0.0225189	ENSG00000117643	MAN1C1
83.5695	-0.945683	0.269332	-3.51121	0.000446066	0.0225189	ENSG00000173585	CCR9
610.097	0.423586	0.120708	3.50917	0.000449501	0.0225699	ENSG00000182621	PLCB1
990.149	-0.135335	0.0385726	-3.50858	0.0004505	0.0225699	ENSG00000149196	HIKESHI
91.8989	-0.325582	0.0928117	-3.50798	0.000451516	0.0225699	ENSG00000173991	TCAP
1353.6	0.176185	0.0503104	3.50196	0.000461855	0.0230112	ENSG00000129460	NGDN
164.692	-0.665462	0.190279	-3.4973	0.000470001	0.023205	ENSG00000079691	CARMIL1
96.1274	-0.580578	0.166012	-3.4972	0.000470162	0.023205	ENSG00000138669	PRKG2
1210.33	-0.128757	0.036818	-3.49712	0.000470309	0.023205	ENSG00000145348	TBCK
220.017	-0.553064	0.158244	-3.495	0.000474065	0.0233148	ENSG00000163359	COL6A3
1373.91	0.24554	0.0702895	3.49326	0.000477154	0.0233913	ENSG00000141295	SCRN2
802.951	-0.256945	0.0735746	-3.4923	0.000478875	0.0234004	ENSG00000100744	GSKIP
1636.78	-0.132781	0.0380701	-3.48779	0.000487023	0.023624	ENSG00000139508	SLC46A3
82.945	-0.35175	0.100868	-3.48725	0.000488013	0.023624	ENSG00000274828	NA
3205.77	0.14088	0.040399	3.4872	0.000488099	0.023624	ENSG00000114302	PRKAR2A
5118.56	0.224572	0.0644147	3.48634	0.00048967	0.023625	ENSG00000174579	MSL2
164.365	-0.734851	0.210846	-3.48524	0.000491691	0.0236477	ENSG00000279496	NA
35.018	-0.778326	0.223607	-3.48078	0.00049996	0.0238633	ENSG00000231062	NA
46.8704	-0.537774	0.154515	-3.4804	0.000500672	0.0238633	ENSG00000264176	MAGOH2P
152.242	-0.784886	0.225583	-3.47937	0.00050259	0.0238633	ENSG00000160111	CPAMD8
1163.6	0.315582	0.0907115	3.47897	0.000503345	0.0238633	ENSG00000100027	YPEL1
1483.29	0.402647	0.115749	3.47862	0.000504	0.0238633	ENSG00000067141	NEO1
3982.51	0.584231	0.168	3.47755	0.00050601	0.0238843	ENSG00000113448	PDE4D
574.721	-0.431222	0.124039	-3.4765	0.000508006	0.0239045	ENSG00000172292	CERS6
4405.83	0.267652	0.0770654	3.47305	0.000514582	0.0241394	ENSG00000101082	SLA2
33.4193	-0.954684	0.275032	-3.47118	0.000518184	0.0242338	ENSG00000166770	ZNF667-AS1
1798.06	0.126492	0.0364715	3.46824	0.000523888	0.0243736	ENSG00000037637	FBXO42
6439.21	-0.23117	0.0666719	-3.46727	0.00052577	0.0243736	ENSG00000120802	TMPO
91.8344	0.574784	0.165779	3.46717	0.000525967	0.0243736	ENSG00000230373	GOLGA6L17P
31.6254	-0.563942	0.162747	-3.46514	0.000529954	0.0244839	ENSG00000261685	NA
45.8818	0.554226	0.160304	3.45735	0.000545507	0.0250638	ENSG00000261114	NA
371.237	-0.89763	0.25964	-3.45721	0.000545794	0.0250638	ENSG00000167618	LAIR2
2863.63	0.153268	0.0443882	3.4529	0.000554602	0.0253918	ENSG00000078403	MLLT10
1901.79	-0.451614	0.13084	-3.45165	0.000557175	0.0254332	ENSG00000164300	SERINC5
4300.13	0.140289	0.0406632	3.45003	0.000560515	0.0254497	ENSG00000025293	PHF20
225.227	0.405967	0.117698	3.44923	0.000562191	0.0254497	ENSG00000103876	FAH
245.261	-0.849396	0.246309	-3.4485	0.000563719	0.0254497	ENSG00000189060	H1-0
4626.76	0.21105	0.0612069	3.44815	0.00056445	0.0254497	ENSG00000179981	TSHZ1
1047.18	-0.571393	0.165743	-3.44746	0.000565883	0.0254497	ENSG00000235532	LINC00402
1334.25	0.197798	0.0574251	3.44446	0.000572209	0.0255925	ENSG00000144560	VGLL4
611.393	-0.289785	0.084139	-3.44412	0.000572912	0.0255925	ENSG00000050344	NFE2L3
763.121	0.478767	0.139039	3.44341	0.000574433	0.0255925	ENSG00000095794	CREM
1559.64	-0.249293	0.0724103	-3.44278	0.000575773	0.0255925	ENSG00000089060	SLC8B1
49.9425	-0.595865	0.173244	-3.43945	0.000582889	0.0258335	ENSG00000185272	RBM11
684.875	0.553054	0.160875	3.43779	0.000586478	0.0259172	ENSG00000140398	NEIL1
370.776	0.373662	0.108745	3.43614	0.000590075	0.0260008	ENSG00000112378	PERP
1380.84	0.127693	0.0372259	3.43022	0.000603088	0.0264519	ENSG00000240230	COX19
4551.9	0.218758	0.0637998	3.42881	0.000606225	0.0264519	ENSG00000166949	SMAD3
82.2558	-0.277256	0.0808674	-3.42852	0.000606878	0.0264519	ENSG00000224536	NA
358.176	-0.403103	0.117579	-3.42835	0.000607252	0.0264519	ENSG00000064763	FAR2
135.677	-0.705684	0.205888	-3.42752	0.00060913	0.0264581	ENSG00000211806	TRAV25
1272.61	0.3396	0.0991279	3.42588	0.000612811	0.0265424	ENSG00000143751	SDE2
22721.5	0.185883	0.0543347	3.42107	0.000623749	0.0269215	ENSG00000010810	FYN
224.695	0.927147	0.271057	3.42049	0.000625095	0.0269215	ENSG00000274767	NA
24.2186	-0.459082	0.134375	-3.41643	0.000634491	0.0272492	ENSG00000213123	DYNLT2B
132	-0.733427	0.214904	-3.41282	0.000642946	0.0275347	ENSG00000164251	F2RL1
26.3487	-0.608786	0.178575	-3.40914	0.000651683	0.0278307	ENSG00000185442	FAM174B
54.5392	-0.690448	0.202646	-3.40716	0.000656419	0.0278926	ENSG00000261804	NA
1089.5	0.201234	0.0590646	3.40701	0.000656791	0.0278926	ENSG00000166860	ZBTB39
3154.12	0.185564	0.0545223	3.40345	0.000665403	0.0281798	ENSG00000213923	CSNK1E
366.523	-0.598718	0.175975	-3.4023	0.000668222	0.0281878	ENSG00000106624	AEBP1
33.3573	-0.665913	0.19575	-3.40186	0.00066929	0.0281878	ENSG00000244161	FLNB-AS1
24.2622	-0.550894	0.162042	-3.39969	0.000674631	0.028318	ENSG00000112320	SOBP
187.999	0.559388	0.16457	3.39909	0.000676095	0.028318	ENSG00000261526	NA
1595.97	0.118476	0.0348755	3.39712	0.000680989	0.0284448	ENSG00000141452	RMC1
3011.03	0.307809	0.0906423	3.39587	0.000684114	0.0284973	ENSG00000006025	OSBPL7
81.5405	0.451494	0.132988	3.395	0.000686292	0.0285101	ENSG00000261220	ST3GAL1-DT
49.4297	0.491127	0.144828	3.39111	0.000696095	0.0288388	ENSG00000175984	DENND2C
1582.44	0.182216	0.0537627	3.38927	0.000700789	0.0288481	ENSG00000139620	KANSL2
100.345	-0.43075	0.127105	-3.38892	0.000701676	0.0288481	ENSG00000176222	ZNF404
1215.04	-0.335739	0.0990795	-3.38858	0.000702545	0.0288481	ENSG00000115839	RAB3GAP1
76.863	-0.646926	0.190957	-3.3878	0.000704545	0.0288481	ENSG00000055118	KCNH2
5853.11	0.176866	0.052214	3.38732	0.00070578	0.0288481	ENSG00000169499	PLEKHA2
134.467	-0.269911	0.0797009	-3.38656	0.000707759	0.0288516	ENSG00000124802	EEF1E1
947.126	0.16023	0.0473243	3.38579	0.000709731	0.0288548	ENSG00000102312	PORCN
613.293	-0.557126	0.164588	-3.38498	0.000711842	0.0288637	ENSG00000167642	SPINT2
17654.8	0.209878	0.0620736	3.38112	0.000721907	0.0291942	ENSG00000107263	RAPGEF1
4935.84	0.234206	0.0692959	3.3798	0.000725394	0.0291982	ENSG00000182173	TSEN54
642.545	-1.40583	0.415972	-3.37963	0.000725837	0.0291982	ENSG00000188536	HBA2
30.7297	-0.768577	0.227593	-3.37697	0.000732878	0.0294038	ENSG00000151320	AKAP6
2846.51	0.104464	0.0309575	3.37444	0.000739648	0.0295785	ENSG00000105127	AKAP8
46.8876	-0.746516	0.221269	-3.37379	0.00074141	0.0295785	ENSG00000258116	PPIAP45
41.0426	-1.14353	0.339006	-3.37318	0.000743052	0.0295785	ENSG00000127920	GNG11
146.076	-0.450388	0.133675	-3.36927	0.000753672	0.0299231	ENSG00000244479	OR2A1-AS1
202.233	0.27734	0.08235	3.36782	0.000757658	0.0299603	ENSG00000230747	NA
5772.05	0.202928	0.0602609	3.3675	0.000758538	0.0299603	ENSG00000140368	PSTPIP1
218.586	0.423104	0.125685	3.36638	0.000761629	0.0300046	ENSG00000133069	TMCC2
1723.54	0.211453	0.0628845	3.36256	0.000772225	0.0302959	ENSG00000187091	PLCD1
233.343	-0.695482	0.206848	-3.36229	0.000772996	0.0302959	ENSG00000169679	BUB1
8512.27	0.269425	0.0801516	3.36144	0.000775366	0.0303108	ENSG00000128294	TPST2
7691.81	-0.284424	0.0846525	-3.35989	0.000779722	0.030318	ENSG00000157978	LDLRAP1
353.277	-0.225642	0.0671574	-3.35989	0.000779738	0.030318	ENSG00000170270	GON7
156.33	-0.643669	0.19161	-3.35926	0.000781514	0.030318	ENSG00000160145	KALRN
2600.92	0.256408	0.0764036	3.35597	0.000790884	0.0306036	ENSG00000159733	ZFYVE28
1928.51	-0.191064	0.0569748	-3.35348	0.00079802	0.0308016	ENSG00000171492	LRRC8D
1382.59	-0.245964	0.0733801	-3.35192	0.000802532	0.0308975	ENSG00000145882	PCYOX1L
35.8914	-1.33609	0.39871	-3.35102	0.000805146	0.03092	ENSG00000057294	PKP2
538.288	-0.423603	0.12644	-3.35022	0.000807462	0.0309311	ENSG00000197020	ZNF100
230.646	-0.542073	0.162142	-3.34321	0.000828154	0.0316442	ENSG00000134057	CCNB1
104.653	-0.909409	0.272146	-3.34162	0.00083292	0.0317468	ENSG00000230006	ANKRD36BP2
1463.08	-0.168064	0.0503133	-3.34034	0.000836752	0.0318133	ENSG00000048544	MRPS10
2508.18	0.160396	0.0480405	3.33877	0.000841514	0.0319147	ENSG00000143514	TP53BP2
188.941	-0.698376	0.209345	-3.336	0.00084994	0.0321188	ENSG00000113749	HRH2
40181	0.303626	0.0910344	3.33529	0.000852101	0.0321188	ENSG00000152518	ZFP36L2
25.962	1.12864	0.338454	3.3347	0.000853924	0.0321188	ENSG00000124785	NRN1
34.5554	-0.329143	0.0987159	-3.33424	0.000855322	0.0321188	ENSG00000246560	UBE2D3-AS1
668.456	0.11327	0.0339984	3.33162	0.000863417	0.0323431	ENSG00000154957	ZNF18
1526.8	0.785338	0.235904	3.32906	0.000871401	0.0325094	ENSG00000090104	RGS1
787.516	-0.538918	0.161894	-3.32883	0.00087212	0.0325094	ENSG00000226210	WASH8P
1229.37	-0.214472	0.0644601	-3.32721	0.000877194	0.0325185	ENSG00000105793	GTPBP10
688.598	0.16079	0.0483317	3.32681	0.000878447	0.0325185	ENSG00000083812	ZNF324
6224.86	0.132789	0.039916	3.32671	0.000878762	0.0325185	ENSG00000140521	POLG
1069.78	-0.168722	0.050743	-3.32502	0.000884109	0.0326371	ENSG00000058804	NDC1
136.199	-0.686927	0.206714	-3.32308	0.000890309	0.0327655	ENSG00000261326	LINC01355
3626.57	-0.238303	0.0717223	-3.32258	0.000891884	0.0327655	ENSG00000088832	FKBP1A
735.994	-0.27103	0.0816995	-3.3174	0.000908589	0.0332886	ENSG00000203668	CHML
2455.43	-0.242335	0.0730942	-3.31538	0.000915172	0.0332886	ENSG00000142166	IFNAR1
508.286	0.316752	0.0955748	3.31418	0.00091912	0.0332886	ENSG00000168487	BMP1
3336.81	0.112269	0.0338791	3.31381	0.000920339	0.0332886	ENSG00000160058	BSDC1
2346.6	0.51197	0.154504	3.31364	0.000920892	0.0332886	ENSG00000211689	TARP
1903.72	0.147238	0.0444347	3.31358	0.000921113	0.0332886	ENSG00000108854	SMURF2
20642.8	-0.412632	0.124531	-3.31349	0.000921408	0.0332886	ENSG00000188404	SELL
3230.72	0.11267	0.0340241	3.31147	0.000928076	0.0334502	ENSG00000128908	INO80
480.29	0.724527	0.218913	3.30966	0.00093411	0.0335883	ENSG00000211697	TRGV5
128.69	-0.325872	0.0985947	-3.30517	0.000949189	0.0340502	ENSG00000223768	LINC00205
1611.01	0.187567	0.0567642	3.30432	0.000952062	0.0340731	ENSG00000179562	GCC1
219.397	-1.01408	0.307076	-3.30236	0.000958733	0.0342315	ENSG00000254275	LINC00824
333.172	-0.530542	0.160731	-3.30082	0.000964041	0.0343406	ENSG00000073331	ALPK1
420.302	-0.776006	0.235235	-3.29886	0.000970783	0.0344297	ENSG00000213949	ITGA1
271.213	-0.671647	0.203605	-3.29878	0.000971059	0.0344297	ENSG00000072195	SPEG
492.225	-0.27384	0.0830395	-3.29771	0.000974781	0.0344814	ENSG00000197013	ZNF429
170.377	-0.497987	0.151206	-3.29343	0.00098973	0.0349292	ENSG00000181652	ATG9B
637.025	0.11675	0.0354609	3.29235	0.000993547	0.034983	ENSG00000182858	ALG12
5720.52	0.175343	0.0533285	3.28798	0.0010091	0.0354391	ENSG00000160007	ARHGAP35
8364.82	0.16636	0.0506139	3.28685	0.00101315	0.0354391	ENSG00000115875	SRSF7
748.716	0.203898	0.0620522	3.28592	0.00101651	0.0354391	ENSG00000173653	RCE1
467.359	-0.176342	0.053666	-3.28591	0.00101653	0.0354391	ENSG00000032742	IFT88
1152.12	0.187351	0.0570352	3.28484	0.00102042	0.0354391	ENSG00000133316	WDR74
1202.8	-0.190366	0.0579625	-3.28429	0.00102239	0.0354391	ENSG00000188352	FOCAD
29.9016	-0.560883	0.170783	-3.28419	0.00102277	0.0354391	ENSG00000271553	NA
275.897	-0.58619	0.178695	-3.28039	0.00103663	0.0358377	ENSG00000122952	ZWINT
275.764	-0.672224	0.205085	-3.27779	0.00104624	0.0360754	ENSG00000189283	FHIT
150.515	1.34287	0.409754	3.27725	0.00104824	0.0360754	ENSG00000109321	AREG
260.087	0.36893	0.112632	3.27553	0.00105465	0.0362143	ENSG00000146707	POMZP3
1776.13	0.124419	0.0380237	3.27215	0.00106733	0.0365676	ENSG00000042445	RETSAT
3112.38	0.310842	0.0950396	3.27065	0.00107299	0.036679	ENSG00000119138	KLF9
316.647	0.3079	0.0941927	3.26883	0.00107993	0.0368335	ENSG00000139714	MORN3
134.891	1.03278	0.316061	3.26765	0.00108446	0.0369056	ENSG00000143297	FCRL5
6107.43	-0.164764	0.050484	-3.26368	0.00109973	0.037342	ENSG00000122565	CBX3
429.684	-0.183639	0.056379	-3.25723	0.00112506	0.0380724	ENSG00000075188	NUP37
519.731	-0.382272	0.117372	-3.25693	0.00112624	0.0380724	ENSG00000089177	KIF16B
322.931	0.308245	0.0946976	3.25505	0.00113373	0.0382409	ENSG00000167535	CACNB3
689.648	0.182088	0.0559554	3.25417	0.00113724	0.0382744	ENSG00000171169	NAIF1
348.517	-0.454105	0.139632	-3.25216	0.0011453	0.0384551	ENSG00000164649	CDCA7L
25.322	-1.77358	0.545456	-3.25155	0.00114778	0.0384551	ENSG00000129596	CDO1
238.45	-0.381121	0.117233	-3.25096	0.00115017	0.0384551	ENSG00000163507	CIP2A
226.531	-0.525519	0.161684	-3.25028	0.00115292	0.0384625	ENSG00000151725	CENPU
149.195	0.486916	0.149938	3.24745	0.00116444	0.0386881	ENSG00000100003	SEC14L2
1264.3	0.167689	0.0516383	3.24737	0.00116475	0.0386881	ENSG00000175376	EIF1AD
1043.17	-0.153418	0.0473023	-3.24336	0.00118128	0.0391518	ENSG00000089195	TRMT6
1865.76	0.163642	0.0504864	3.24131	0.0011898	0.0392757	ENSG00000154370	TRIM11
70.4089	-0.600793	0.185409	-3.24037	0.00119375	0.0392757	ENSG00000197880	MDS2
1246.7	0.243744	0.0752226	3.24031	0.00119401	0.0392757	ENSG00000123595	RAB9A
399.765	-0.376579	0.116228	-3.23999	0.00119532	0.0392757	ENSG00000162946	DISC1
223.439	-0.223083	0.0689007	-3.23774	0.00120481	0.0393652	ENSG00000152422	XRCC4
349.03	0.228656	0.0706263	3.23754	0.00120563	0.0393652	ENSG00000177337	DLGAP1-AS1
2832.24	-0.170755	0.0527427	-3.23751	0.00120579	0.0393652	ENSG00000166313	APBB1
3414.03	-1.33233	0.411686	-3.23627	0.00121103	0.0394518	ENSG00000244734	HBB
1609.17	0.588469	0.18194	3.23442	0.00121892	0.039624	ENSG00000176845	METRNL
6889.02	0.106331	0.0328942	3.2325	0.00122712	0.0398056	ENSG00000139990	DCAF5
4421.86	-0.329282	0.101916	-3.23092	0.00123391	0.0398872	ENSG00000183688	RFLNB
93.2942	0.633083	0.195993	3.23014	0.0012373	0.0398872	ENSG00000137267	TUBB2A
87.2373	-0.39109	0.121077	-3.2301	0.00123748	0.0398872	ENSG00000131400	NAPSA
1401.71	0.191787	0.0594156	3.22788	0.0012471	0.0401126	ENSG00000065060	UHRF1BP1
1729.29	0.10171	0.031526	3.22622	0.00125437	0.0402612	ENSG00000197037	ZSCAN25
1040.1	-0.132597	0.0411109	-3.22534	0.00125824	0.0403008	ENSG00000128513	POT1
234.02	-0.254253	0.0788688	-3.22375	0.00126524	0.04044	ENSG00000110013	SIAE
135.716	0.434957	0.135043	3.22087	0.001278	0.0406783	ENSG00000125084	WNT1
46.5955	-0.347194	0.107795	-3.22087	0.00127804	0.0406783	ENSG00000224892	RPS4XP16
3095.61	0.108468	0.0336943	3.21917	0.00128564	0.0407852	ENSG00000167699	GLOD4
285.097	-0.34507	0.107201	-3.21892	0.00128674	0.0407852	ENSG00000185875	THNSL1
1712.77	-0.134417	0.0417786	-3.21737	0.00129372	0.0408921	ENSG00000091164	TXNL1
40.6968	0.387557	0.120472	3.21698	0.00129548	0.0408921	ENSG00000235109	ZSCAN31
2746.34	0.154047	0.0479115	3.21524	0.00130336	0.0410557	ENSG00000164080	RAD54L2
2813.49	0.131457	0.040897	3.21434	0.00130743	0.0410961	ENSG00000177613	CSTF2T
554.551	-0.214848	0.0668521	-3.21377	0.00131003	0.0410961	ENSG00000128059	PPAT
807.407	0.264499	0.0823432	3.21215	0.00131747	0.0412208	ENSG00000121578	B4GALT4
556.121	0.200847	0.0625388	3.21156	0.00132016	0.0412208	ENSG00000174177	CTU2
9277.64	0.113328	0.0352923	3.21114	0.00132212	0.0412208	ENSG00000182934	SRPRA
13250.1	0.306074	0.095347	3.21011	0.00132684	0.0412836	ENSG00000125347	IRF1
987.167	-0.521025	0.162367	-3.20894	0.00133224	0.0413137	ENSG00000114812	VIPR1
4904.9	0.139663	0.0435259	3.20873	0.00133322	0.0413137	ENSG00000105993	DNAJB6
760.007	-0.141248	0.044033	-3.20777	0.00133769	0.0413302	ENSG00000120925	RNF170
5810.79	-0.178144	0.0555434	-3.20728	0.00133995	0.0413302	ENSG00000205268	PDE7A
162.486	-0.796011	0.248232	-3.20672	0.00134259	0.0413302	ENSG00000165029	ABCA1
715.172	-0.931885	0.290643	-3.20629	0.0013446	0.0413302	ENSG00000254681	PKD1P5
36.0618	-2.02195	0.630915	-3.20479	0.00135161	0.0414621	ENSG00000204936	CD177
5714.83	0.128398	0.0400907	3.20269	0.00136152	0.0416822	ENSG00000100991	TRPC4AP
294.789	-0.189826	0.0593395	-3.19897	0.00137917	0.0420998	ENSG00000211584	SLC48A1
51.2678	-0.760563	0.237776	-3.19866	0.00138068	0.0420998	ENSG00000151715	TMEM45B
37.6219	-0.376801	0.117822	-3.19807	0.00138353	0.0421023	ENSG00000241764	CBLL1-AS1
5358.56	0.0968639	0.0303041	3.1964	0.00139156	0.0422625	ENSG00000163930	BAP1
87.923	-0.54648	0.171092	-3.19408	0.00140279	0.0425188	ENSG00000173295	FAM86B3P
229.441	0.301589	0.0944963	3.19154	0.00141515	0.0425969	ENSG00000106246	PTCD1
331.073	0.204122	0.063959	3.19146	0.00141557	0.0425969	ENSG00000171861	MRM3
1072.26	-0.266935	0.0836408	-3.19144	0.00141564	0.0425969	ENSG00000196268	ZNF493
2658.89	0.127096	0.0398385	3.19027	0.00142138	0.0425969	ENSG00000130803	ZNF317
113.596	-0.224018	0.0702192	-3.19026	0.00142144	0.0425969	ENSG00000216895	RBM33-DT
1000.26	0.453295	0.142093	3.19012	0.00142213	0.0425969	ENSG00000087258	GNAO1
12106	0.239686	0.0751832	3.18803	0.00143245	0.042772	ENSG00000101474	APMAP
39.6032	-0.299707	0.0940168	-3.1878	0.00143359	0.042772	ENSG00000265458	NARF-AS2
257.546	-0.19714	0.0618549	-3.18713	0.00143692	0.0427876	ENSG00000156384	SFR1
578.47	-0.560786	0.175999	-3.1863	0.00144104	0.0428076	ENSG00000211789	TRAV12-2
37.342	-1.15214	0.36164	-3.18586	0.00144325	0.0428076	ENSG00000184702	SEPTIN5
727.402	0.295971	0.0929348	3.18472	0.00144895	0.0428076	ENSG00000115339	GALNT3
90.792	-0.305833	0.0960464	-3.18422	0.00145143	0.0428076	ENSG00000263327	TAPT1-AS1
55.7709	0.510746	0.160401	3.18418	0.00145163	0.0428076	ENSG00000261270	NA
37.9378	-0.529927	0.166528	-3.18221	0.00146154	0.0430167	ENSG00000130545	CRB3
34753.1	0.213857	0.06722	3.18145	0.0014654	0.0430473	ENSG00000188042	ARL4C
82.8496	-0.857351	0.269585	-3.18026	0.00147144	0.0430703	ENSG00000234456	MAGI2-AS3
5613.22	0.157142	0.0494129	3.18018	0.00147184	0.0430703	ENSG00000112624	BICRAL
88.8648	-0.816951	0.25694	-3.17954	0.00147509	0.0430829	ENSG00000134193	REG4
37.9356	-0.291636	0.0917606	-3.17823	0.00148177	0.0431634	ENSG00000247950	SEC24B-AS1
631.262	-0.172362	0.0542378	-3.17789	0.00148351	0.0431634	ENSG00000237765	FAM200B
474.649	0.161027	0.0507128	3.17528	0.00149689	0.0434698	ENSG00000066697	MSANTD3
133.361	-0.401481	0.126668	-3.16955	0.00152675	0.0442526	ENSG00000240225	ZNF542P
231.494	-0.289354	0.0913204	-3.16855	0.00153199	0.0443202	ENSG00000006757	PNPLA4
5768.93	0.0716908	0.0226352	3.16723	0.00153897	0.0444379	ENSG00000166887	VPS39
3366.2	0.216985	0.0685539	3.16518	0.00154988	0.0445432	ENSG00000129315	CCNT1
98.1646	-0.686134	0.216781	-3.16511	0.00155026	0.0445432	ENSG00000142798	HSPG2
249.116	-0.275537	0.0870602	-3.1649	0.00155139	0.0445432	ENSG00000261512	NA
39.3779	-0.950744	0.30071	-3.16166	0.00156873	0.0448733	ENSG00000129946	SHC2
2179.9	-0.152072	0.0480988	-3.16165	0.00156877	0.0448733	ENSG00000168374	ARF4
101.255	0.345542	0.109407	3.15831	0.00158684	0.0453052	ENSG00000237513	NA
4216.27	0.165495	0.0524779	3.15361	0.00161262	0.0459173	ENSG00000105643	ARRDC2
26.0932	-0.633336	0.200848	-3.15331	0.0016143	0.0459173	ENSG00000261471	NA
241.784	0.565017	0.179251	3.1521	0.00162103	0.0459754	ENSG00000111788	NA
124.91	-0.871589	0.276532	-3.15185	0.00162238	0.0459754	ENSG00000079385	CEACAM1
4380.99	0.137951	0.0438108	3.14879	0.00163951	0.0462609	ENSG00000177963	RIC8A
2836.99	0.285011	0.0905219	3.14853	0.00164095	0.0462609	ENSG00000159111	MRPL10
25.5211	0.665254	0.211298	3.14842	0.00164155	0.0462609	ENSG00000203697	CAPN8
1274.85	0.249913	0.0794766	3.14449	0.00166376	0.0468002	ENSG00000132823	OSER1
1083.91	0.24269	0.0772367	3.14216	0.00167706	0.0470875	ENSG00000133818	RRAS2
5140.54	0.186027	0.0592357	3.14045	0.00168689	0.0471775	ENSG00000101695	RNF125
120.272	-0.245056	0.0780323	-3.14044	0.00168694	0.0471775	ENSG00000237036	ZEB1-AS1
168.459	-0.415702	0.132424	-3.13917	0.0016943	0.0471775	ENSG00000167861	HID1
1615.77	-0.181972	0.0579686	-3.13914	0.00169443	0.0471775	ENSG00000139684	ESD
1014.91	0.166787	0.0531353	3.13892	0.00169574	0.0471775	ENSG00000068971	PPP2R5B
23872.8	0.330877	0.105473	3.13708	0.00170641	0.0473878	ENSG00000157514	TSC22D3
227.52	0.282387	0.0900336	3.13646	0.00171003	0.047402	ENSG00000162599	NFIA
28.1157	1.27954	0.40814	3.13507	0.00171816	0.0475409	ENSG00000211673	IGLV3-1
671.054	-0.128145	0.0408937	-3.13362	0.00172665	0.0476894	ENSG00000095380	NANS
2914.85	0.0997527	0.0318459	3.13236	0.00173406	0.0478075	ENSG00000143093	STRIP1
214.559	-0.300529	0.0959791	-3.13119	0.00174099	0.0478633	ENSG00000279059	NA
31.4067	0.702853	0.224485	3.13096	0.00174237	0.0478633	ENSG00000269919	NA
47.8271	-0.292324	0.093388	-3.13021	0.0017468	0.0478987	ENSG00000232470	NA
7396.96	-0.200603	0.0641219	-3.12846	0.00175727	0.0480993	ENSG00000143815	LBR
80.6572	-0.437111	0.139808	-3.12652	0.0017689	0.0483308	ENSG00000111879	FAM184A
782.863	0.293222	0.0938111	3.12566	0.00177406	0.0483853	ENSG00000198780	FAM169A
2616.17	0.122245	0.039127	3.12431	0.00178222	0.0483991	ENSG00000110851	PRDM4
32.0708	-0.512985	0.16422	-3.12378	0.00178546	0.0483991	ENSG00000122543	OCM
250.994	-0.477128	0.152755	-3.12348	0.00178726	0.0483991	ENSG00000211778	TRAV4
1682.64	0.124801	0.0399558	3.12348	0.00178727	0.0483991	ENSG00000133059	DSTYK
647.861	0.246983	0.0791414	3.12078	0.00180374	0.0487586	ENSG00000167447	SMG8
6432.01	0.112354	0.0360266	3.11863	0.00181695	0.0490286	ENSG00000186566	GPATCH8
7864.06	0.181966	0.0583603	3.11797	0.00182102	0.0490518	ENSG00000162889	MAPKAPK2
4140.82	0.139245	0.0446688	3.11728	0.00182526	0.0490793	ENSG00000065675	PRKCQ
27.6358	-0.988235	0.317127	-3.11621	0.00183191	0.0491713	ENSG00000049323	LTBP1
90.8442	-0.567967	0.182368	-3.11441	0.00184315	0.049386	ENSG00000100526	CDKN3
7107.31	0.113608	0.0365092	3.11178	0.00185965	0.0497407	ENSG00000110514	MADD
31.5617	-0.484058	0.155672	-3.10948	0.00187417	0.0500413	ENSG00000278959	NA
308.035	-0.650679	0.209303	-3.10879	0.00187858	0.0500713	ENSG00000145386	CCNA2
421.302	-0.16009	0.0515084	-3.10803	0.00188337	0.0501115	ENSG00000129480	DTD2
608.263	0.300511	0.096759	3.10577	0.00189786	0.0503837	ENSG00000168237	GLYCTK
468.983	-0.184454	0.0594085	-3.10484	0.00190382	0.0503837	ENSG00000100522	GNPNAT1
1156.6	-0.266472	0.0858397	-3.1043	0.00190733	0.0503837	ENSG00000008282	SYPL1
164.37	-0.754195	0.242998	-3.10371	0.00191109	0.0503837	ENSG00000157456	CCNB2
75.0151	-0.756871	0.243936	-3.10274	0.00191737	0.0503837	ENSG00000183625	CCR3
1393.84	0.167356	0.05394	3.10264	0.00191805	0.0503837	ENSG00000185813	PCYT2
83.6598	-0.578501	0.186484	-3.10215	0.00192122	0.0503837	ENSG00000154839	SKA1
1048.87	0.14583	0.0470138	3.10186	0.00192308	0.0503837	ENSG00000186104	CYP2R1
23526.3	0.146585	0.0472577	3.10182	0.00192334	0.0503837	ENSG00000170776	AKAP13
187.779	-0.416987	0.134647	-3.09689	0.00195561	0.0511411	ENSG00000132932	ATP8A2
103.821	-0.742396	0.239855	-3.09518	0.00196692	0.0513488	ENSG00000090889	KIF4A
251.795	0.184042	0.0594902	3.09365	0.00197712	0.0515269	ENSG00000100147	CCDC134
88.3706	-0.629275	0.203649	-3.08999	0.00200162	0.0520648	ENSG00000142552	RCN3
2779.8	-0.525557	0.170138	-3.08901	0.00200825	0.0520648	ENSG00000160712	IL6R
2229.53	0.166527	0.0539192	3.08846	0.002012	0.0520648	ENSG00000146109	ABT1
763.074	0.36892	0.119452	3.08844	0.00201209	0.0520648	ENSG00000188001	TPRG1
464.416	0.184737	0.0598325	3.08757	0.002018	0.0520648	ENSG00000141026	MED9
2480.09	0.305359	0.0989446	3.08616	0.00202757	0.0520648	ENSG00000008283	CYB561
2716.01	-0.439307	0.142348	-3.08616	0.00202762	0.0520648	ENSG00000184014	DENND5A
62.4465	-0.644881	0.208984	-3.0858	0.00203008	0.0520648	ENSG00000186193	SAPCD2
994.046	-0.0902203	0.0292377	-3.08576	0.00203034	0.0520648	ENSG00000135336	ORC3
100.548	-0.449471	0.145671	-3.08553	0.00203192	0.0520648	ENSG00000187699	C2orf88
106.649	-0.714107	0.23149	-3.08483	0.00203667	0.052099	ENSG00000170485	NPAS2
150.259	0.528152	0.171245	3.08418	0.00204112	0.0521254	ENSG00000184293	CLECL1
572.962	-0.196497	0.0637467	-3.08247	0.00205291	0.0523388	ENSG00000182183	SHISAL2A
87.7598	-0.466174	0.151268	-3.08177	0.00205771	0.0523736	ENSG00000186871	ERCC6L
873.224	-0.77249	0.250753	-3.08068	0.00206531	0.0524568	ENSG00000173114	LRRN3
1535.31	0.133231	0.0432525	3.08031	0.00206786	0.0524568	ENSG00000274211	SOCS7
35.1941	-0.828244	0.268932	-3.07975	0.00207171	0.0524673	ENSG00000129654	FOXJ1
127.674	-1.83092	0.594873	-3.07782	0.00208518	0.0527208	ENSG00000162551	ALPL
15227.6	-0.261174	0.0849212	-3.07548	0.00210163	0.0529899	ENSG00000111716	LDHB
609.096	-0.604519	0.196571	-3.07532	0.00210277	0.0529899	ENSG00000159399	HK2
81.9799	-0.571031	0.185746	-3.07425	0.00211032	0.0530924	ENSG00000249825	THBS4-AS1
482.738	0.24767	0.0806034	3.0727	0.00212129	0.0532196	ENSG00000215190	LINC00680
38.4094	-0.358767	0.116765	-3.07255	0.00212236	0.0532196	ENSG00000211888	TRAJ1
2632.81	0.121507	0.0395533	3.07199	0.00212635	0.0532322	ENSG00000160803	UBQLN4
5173.99	0.101198	0.0329583	3.07047	0.00213723	0.0533441	ENSG00000154930	ACSS1
7584.24	0.144887	0.0471885	3.07039	0.00213782	0.0533441	ENSG00000087087	SRRT
32.1842	-0.745082	0.243019	-3.06594	0.00216984	0.0539917	ENSG00000184005	ST6GALNAC3
30.9345	-0.619268	0.201992	-3.0658	0.00217086	0.0539917	ENSG00000279741	NA
116.316	-0.647402	0.211302	-3.06386	0.00218498	0.0541755	ENSG00000005102	MEOX1
1560.32	-0.199742	0.0651964	-3.06369	0.00218623	0.0541755	ENSG00000006451	RALA
1992.38	0.390238	0.127422	3.06258	0.00219441	0.0541755	ENSG00000107968	MAP3K8
105.722	-0.379684	0.123976	-3.06257	0.00219447	0.0541755	ENSG00000198429	ZNF69
27.0361	-0.477619	0.155974	-3.06217	0.00219737	0.0541755	ENSG00000272345	NA
17499.1	-0.128485	0.0419628	-3.06187	0.00219957	0.0541755	ENSG00000187764	SEMA4D
41.5354	-0.553457	0.180789	-3.06135	0.00220344	0.0541834	ENSG00000198673	TAFA2
41.2292	-0.855393	0.279469	-3.06078	0.00220762	0.0541986	ENSG00000024526	DEPDC1
31.0315	-0.731808	0.239325	-3.05779	0.00222972	0.0545947	ENSG00000278828	H3C10
164.177	0.423243	0.138422	3.05763	0.00223091	0.0545947	ENSG00000164050	PLXNB1
658.698	0.265397	0.0868161	3.05701	0.00223559	0.0546215	ENSG00000130940	CASZ1
1138.45	0.157276	0.0515163	3.05293	0.00226617	0.05528	ENSG00000197021	EOLA2
686.026	-0.251992	0.0825816	-3.05143	0.00227751	0.0553955	ENSG00000246223	LINC01550
47.1544	-0.48797	0.15992	-3.05135	0.00227817	0.0553955	ENSG00000135643	KCNMB4
189.043	-0.735766	0.241186	-3.05061	0.00228377	0.0554433	ENSG00000117399	CDC20
52.6802	-0.616855	0.202327	-3.0488	0.00229757	0.0556896	ENSG00000267508	ZNF285
1507.16	0.320812	0.105266	3.04762	0.00230664	0.0558206	ENSG00000143842	SOX13
127.254	-0.679441	0.223097	-3.0455	0.00232297	0.056057	ENSG00000137807	KIF23
2560.69	0.139928	0.0459564	3.0448	0.00232834	0.056057	ENSG00000198925	ATG9A
146.93	-0.525231	0.172537	-3.04416	0.00233332	0.056057	ENSG00000174791	RIN1
1216.91	0.0948504	0.0311603	3.04395	0.00233497	0.056057	ENSG00000184056	VPS33B
1733.64	0.0924384	0.030371	3.04365	0.0023373	0.056057	ENSG00000164068	RNF123
27.9869	0.338841	0.111345	3.04317	0.00234103	0.056057	ENSG00000250131	AGA-DT
106.438	-0.236164	0.07762	-3.04257	0.00234569	0.056057	ENSG00000244041	LINC01011
142.566	-0.309386	0.101699	-3.04216	0.00234885	0.056057	ENSG00000247271	ZBED5-AS1
580.681	-0.149209	0.0490483	-3.04208	0.0023495	0.056057	ENSG00000272047	GTF2H5
2073.74	0.226315	0.0745063	3.03753	0.00238528	0.0567744	ENSG00000277147	LINC00869
51.4369	0.544586	0.179302	3.03726	0.00238743	0.0567744	ENSG00000233916	ZDHHC20P1
78.6823	-0.746368	0.245772	-3.03684	0.00239074	0.0567744	ENSG00000112984	KIF20A
2453.26	-0.23572	0.0776344	-3.03628	0.00239516	0.0567909	ENSG00000184384	MAML2
1373.1	-0.147681	0.0486773	-3.03387	0.00241435	0.0571572	ENSG00000119203	CPSF3
329.313	-0.258757	0.0853271	-3.03253	0.00242517	0.0572377	ENSG00000133119	RFC3
509.527	-0.443377	0.146208	-3.03251	0.00242526	0.0572377	ENSG00000143409	MINDY1
97.8922	-0.948332	0.313009	-3.02973	0.0024477	0.0576252	ENSG00000163737	PF4
1679.88	0.161772	0.053398	3.02954	0.00244924	0.0576252	ENSG00000165632	TAF3
186.592	-0.634141	0.209405	-3.02831	0.00245929	0.0577726	ENSG00000170312	CDK1
2382.51	0.176808	0.0584008	3.0275	0.00246583	0.0578181	ENSG00000169641	LUZP1
946.034	0.132732	0.0438475	3.02714	0.00246882	0.0578181	ENSG00000196646	ZNF136
63.1789	-0.531991	0.175774	-3.02657	0.00247349	0.0578386	ENSG00000113296	THBS4
5356.51	-0.434571	0.143742	-3.02328	0.0025005	0.058368	ENSG00000117602	RCAN3
1089.27	-0.240814	0.0796788	-3.0223	0.0025086	0.058368	ENSG00000138764	CCNG2
81.9968	-0.398101	0.131748	-3.02168	0.00251376	0.058368	ENSG00000146410	MTFR2
39.4066	-0.459482	0.152068	-3.02156	0.00251474	0.058368	ENSG00000279344	NA
978.577	-0.260871	0.0863381	-3.0215	0.00251527	0.058368	ENSG00000171262	FAM98B
1866.71	0.23897	0.0791586	3.01888	0.00253713	0.0586874	ENSG00000143889	HNRNPLL
1576.44	-0.115917	0.0383982	-3.01882	0.00253764	0.0586874	ENSG00000014919	COX15
30.3498	0.623506	0.206582	3.0182	0.00254283	0.0586874	ENSG00000246228	CASC8
26.7643	-0.455529	0.150937	-3.01801	0.00254443	0.0586874	ENSG00000148935	GAS2
493.161	0.603195	0.200081	3.01476	0.00257184	0.059054	ENSG00000185022	MAFF
209.617	-0.369744	0.122665	-3.01425	0.00257616	0.059054	ENSG00000170627	GTSF1
1352.85	0.239814	0.079565	3.01407	0.00257768	0.059054	ENSG00000225648	SBDSP1
1158.76	-0.135869	0.0450794	-3.01398	0.00257841	0.059054	ENSG00000116120	FARSB
15724.1	0.10176	0.0337683	3.01349	0.00258262	0.059054	ENSG00000134516	DOCK2
680.657	0.154037	0.0511261	3.01288	0.0025878	0.059054	ENSG00000269335	IKBKG
3759.66	0.153381	0.050911	3.01273	0.00258912	0.059054	ENSG00000006831	ADIPOR2
66.2271	-0.832905	0.276486	-3.01247	0.00259131	0.059054	ENSG00000106070	GRB10
6119.33	0.154148	0.0511825	3.01174	0.00259753	0.0591073	ENSG00000122557	HERPUD2
2402.99	0.120192	0.0399204	3.0108	0.00260562	0.0592031	ENSG00000133065	SLC41A1
7605.31	0.132531	0.0440296	3.01005	0.00261204	0.0592607	ENSG00000154822	PLCL2
25.4751	-0.553934	0.184113	-3.00867	0.00262396	0.0594427	ENSG00000261118	NA
42548.5	0.159172	0.052934	3.007	0.00263842	0.0596816	ENSG00000106948	AKNA
569.035	-0.214722	0.0714186	-3.00652	0.00264253	0.059686	ENSG00000105829	BET1
707.549	-0.444189	0.147872	-3.00388	0.00266557	0.0601174	ENSG00000171033	PKIA
966.886	-0.134261	0.0447069	-3.00314	0.00267207	0.0601749	ENSG00000182919	C11orf54
102.55	0.250094	0.0833051	3.00215	0.00268084	0.0602832	ENSG00000266865	LOC107984974
364.731	-0.325867	0.108607	-3.00043	0.00269599	0.0604836	ENSG00000182700	IGIP
273.703	-1.41711	0.472332	-3.00024	0.00269768	0.0604836	ENSG00000100985	MMP9
91.3114	-0.321212	0.107135	-2.9982	0.00271576	0.0607996	ENSG00000276180	H4C9
160.331	-0.493082	0.164698	-2.99385	0.00275483	0.0615837	ENSG00000279672	NA
304.385	0.229724	0.0767448	2.99335	0.00275936	0.0615947	ENSG00000162194	LBHD1
4920.82	0.144605	0.0483308	2.99198	0.0027717	0.0617798	ENSG00000131242	RAB11FIP4
196.265	0.929093	0.310734	2.98999	0.00278986	0.0620938	ENSG00000276085	CCL3L3
905.617	-0.203343	0.0680497	-2.98816	0.0028066	0.0623678	ENSG00000154059	IMPACT
122.696	-0.350268	0.117235	-2.98775	0.00281035	0.0623678	ENSG00000279722	NA
6436.54	0.111022	0.0371661	2.98719	0.00281552	0.0623916	ENSG00000116731	PRDM2
98.7336	-0.679894	0.22778	-2.98487	0.00283697	0.0627756	ENSG00000211780	TRAV6
490.83	-0.220549	0.0739079	-2.98411	0.00284404	0.0627865	ENSG00000066855	MTFR1
785.579	0.113	0.0378695	2.98393	0.0028457	0.0627865	ENSG00000163900	TMEM41A
116.238	0.386837	0.129722	2.98205	0.00286323	0.063082	ENSG00000242114	MTFP1
912.286	-0.155443	0.0521804	-2.97895	0.00289239	0.0636325	ENSG00000092020	PPP2R3C
427.748	-0.206614	0.0694118	-2.97665	0.00291419	0.0640197	ENSG00000230487	PSMG3-AS1
68.5693	-0.472145	0.158688	-2.97531	0.00292694	0.0641566	ENSG00000088256	GNA11
90.1626	-0.724767	0.24361	-2.97511	0.00292883	0.0641566	ENSG00000110881	ASIC1
341.725	-0.372924	0.125386	-2.97421	0.00293747	0.0642356	ENSG00000203709	MIR29B2CHG
1840.22	-0.404588	0.136049	-2.97385	0.00294086	0.0642356	ENSG00000156052	GNAQ
1590.8	0.168383	0.0566383	2.97295	0.00294957	0.0643335	ENSG00000105656	ELL
4551.33	0.308922	0.103947	2.97192	0.00295943	0.0644564	ENSG00000135048	CEMIP2
48.2816	-1.04678	0.352375	-2.97063	0.0029719	0.0646356	ENSG00000188659	SAXO2
206.347	-0.946494	0.318699	-2.96987	0.00297928	0.0646503	ENSG00000163736	PPBP
347.108	-0.446992	0.150525	-2.96955	0.00298238	0.0646503	ENSG00000092621	PHGDH
1291.16	0.108655	0.0365934	2.96925	0.00298529	0.0646503	ENSG00000197024	ZNF398
581.871	0.46485	0.156716	2.96618	0.00301521	0.0650928	ENSG00000237499	WAKMAR2
162.53	0.13784	0.0464751	2.96589	0.0030181	0.0650928	ENSG00000222011	FAM185A
2539.98	-0.262261	0.0884398	-2.96542	0.00302274	0.0650928	ENSG00000108953	YWHAE
51.8034	0.707489	0.23858	2.96541	0.00302281	0.0650928	ENSG00000158113	LRRC43
1865.67	0.197176	0.0665054	2.96481	0.00302865	0.0651268	ENSG00000117036	ETV3
3763.88	0.229785	0.0775154	2.96438	0.00303293	0.0651269	ENSG00000173706	HEG1
859.517	-0.138525	0.0467435	-2.96352	0.00304138	0.0652132	ENSG00000162623	TYW3
147.883	-0.374161	0.126273	-2.96311	0.00304551	0.0652132	ENSG00000106484	MEST
2405.67	0.339828	0.11476	2.9612	0.00306438	0.0654551	ENSG00000163659	TIPARP
7317.25	0.0892761	0.0301518	2.96088	0.00306758	0.0654551	ENSG00000140943	MBTPS1
13638.6	0.176739	0.0596955	2.96067	0.00306968	0.0654551	ENSG00000151883	PARP8
97.4033	0.404297	0.136663	2.95834	0.00309296	0.0658453	ENSG00000280407	NA
756.837	-0.152382	0.0515173	-2.95788	0.00309768	0.0658453	ENSG00000197563	PIGN
1148.92	0.19442	0.0657383	2.95749	0.00310159	0.0658453	ENSG00000125821	DTD1
546.718	-0.478248	0.16175	-2.95672	0.00310929	0.0658453	ENSG00000134321	RSAD2
1420.73	0.196351	0.0664122	2.95656	0.00311096	0.0658453	ENSG00000139629	GALNT6
130.882	-0.458819	0.155202	-2.95626	0.00311389	0.0658453	ENSG00000143412	ANXA9
143.846	0.354369	0.119894	2.95568	0.00311982	0.0658792	ENSG00000224914	LINC00863
166.347	-0.226103	0.0765251	-2.95463	0.00313044	0.0659604	ENSG00000145331	TRMT10A
598.177	-0.657211	0.222448	-2.95444	0.00313232	0.0659604	ENSG00000142089	IFITM3
59.5369	-0.244314	0.0828239	-2.9498	0.00317982	0.0668683	ENSG00000270820	USP34-DT
4669.02	0.103987	0.0352671	2.94854	0.00319279	0.0670418	ENSG00000179335	CLK3
765.572	0.143312	0.048611	2.94815	0.00319687	0.0670418	ENSG00000148842	CNNM2
1560.37	0.0860008	0.0291889	2.94636	0.00321541	0.0673381	ENSG00000132254	ARFIP2
515.336	-0.126407	0.0429173	-2.94536	0.0032258	0.067463	ENSG00000174456	C12orf76
156.979	-0.352439	0.119719	-2.94388	0.00324121	0.0676646	ENSG00000272335	NA
1492.75	-0.574238	0.195081	-2.94359	0.00324432	0.0676646	ENSG00000172005	MAL
34.0829	0.312682	0.106253	2.94281	0.00325245	0.0677416	ENSG00000248503	NA
41.559	-0.312031	0.106081	-2.94145	0.00326676	0.0678414	ENSG00000271780	NA
5015.66	0.120145	0.0408499	2.94114	0.00327011	0.0678414	ENSG00000100647	SUSD6
72.1018	-1.763	0.599439	-2.94109	0.00327059	0.0678414	ENSG00000179869	ABCA13
28.338	-0.270098	0.0918958	-2.93917	0.00329088	0.0681329	ENSG00000237651	C2orf74
6352.61	0.0854104	0.0290618	2.93892	0.00329358	0.0681329	ENSG00000182446	NPLOC4
9118.22	-0.282843	0.0963019	-2.93705	0.00331353	0.0683951	ENSG00000167106	FAM102A
159.957	-0.17409	0.0592769	-2.93689	0.00331523	0.0683951	ENSG00000251615	NA
2840.08	0.147802	0.0503427	2.93592	0.00332557	0.0684897	ENSG00000107819	SFXN3
67.0477	-0.416714	0.141951	-2.93562	0.0033288	0.0684897	ENSG00000093217	XYLB
116.469	-0.301703	0.102803	-2.93476	0.00333807	0.0685097	ENSG00000158859	ADAMTS4
2869.23	0.131688	0.0448727	2.93469	0.00333876	0.0685097	ENSG00000183049	CAMK1D
94.3053	-0.276359	0.094232	-2.93275	0.00335976	0.0688479	ENSG00000105270	CLIP3
1646.15	0.327944	0.111845	2.93212	0.0033666	0.0688956	ENSG00000163874	ZC3H12A
898.457	0.134569	0.0459253	2.93017	0.00338773	0.0692351	ENSG00000171865	RNASEH1
618.491	-0.13521	0.0461642	-2.92889	0.00340175	0.0694284	ENSG00000136933	RABEPK
409.961	0.271618	0.0927987	2.92696	0.00342296	0.069768	ENSG00000154640	BTG3
25.8139	-0.801409	0.273906	-2.92585	0.00343513	0.0699225	ENSG00000172296	SPTLC3
702.298	-0.513631	0.175627	-2.92455	0.00344953	0.0701221	ENSG00000173597	SULT1B1
87.1507	0.370247	0.126677	2.92276	0.00346947	0.0704334	ENSG00000181097	LINC02878
109.296	-0.559522	0.19159	-2.92041	0.00349566	0.0707895	ENSG00000035499	DEPDC1B
552.697	-1.00214	0.343157	-2.92036	0.00349629	0.0707895	ENSG00000163221	S100A12
475.091	0.225868	0.0774225	2.91735	0.00353024	0.071382	ENSG00000084731	KIF3C
59.1633	0.774506	0.265596	2.91611	0.00354428	0.071571	ENSG00000144115	THNSL2
50.9498	-0.298371	0.102388	-2.91411	0.00356702	0.071855	ENSG00000247400	DNAJC3-DT
2704.35	-0.11276	0.0386955	-2.91405	0.00356777	0.071855	ENSG00000138029	HADHB
628.037	-0.146546	0.0503079	-2.91297	0.00358006	0.0719819	ENSG00000104047	DTWD1
332.597	-0.315857	0.108442	-2.91267	0.00358351	0.0719819	ENSG00000257151	NA
1728.17	0.143778	0.0493844	2.9114	0.00359808	0.0721795	ENSG00000153406	NMRAL1
734.49	-0.151075	0.0519159	-2.90999	0.00361437	0.0723747	ENSG00000076043	REXO2
854.164	-0.154414	0.053068	-2.90974	0.00361731	0.0723747	ENSG00000077514	POLD3
5052.48	0.0884503	0.03041	2.9086	0.00363055	0.072496	ENSG00000176915	ANKLE2
5888.14	-0.13946	0.0479509	-2.9084	0.00363288	0.072496	ENSG00000164985	PSIP1
30.4286	-0.541341	0.186182	-2.90759	0.00364231	0.0725891	ENSG00000244198	ARHGEF35-AS1
142.136	-0.397009	0.136611	-2.90612	0.00365938	0.072834	ENSG00000059915	PSD
366.887	0.149714	0.0515282	2.90549	0.00366684	0.0728874	ENSG00000186153	WWOX
139.955	-0.799763	0.275314	-2.90492	0.00367351	0.072925	ENSG00000226777	FAM30A
38.5477	-0.739856	0.254921	-2.90229	0.00370446	0.0734437	ENSG00000019102	VSIG2
490.721	-0.116495	0.0401607	-2.90072	0.00372311	0.0736113	ENSG00000175575	PAAF1
2853.25	-0.102339	0.0352821	-2.90061	0.00372442	0.0736113	ENSG00000158864	NDUFS2
8716.71	-0.183953	0.0634242	-2.90036	0.0037274	0.0736113	ENSG00000130741	EIF2S3
111.622	-0.24344	0.0839538	-2.89969	0.00373535	0.0736729	ENSG00000214654	B3GALT9
4104.88	0.118322	0.0408219	2.89849	0.00374959	0.0738583	ENSG00000100425	BRD1
703.011	-0.222411	0.0767512	-2.89781	0.00375778	0.073924	ENSG00000155189	AGPAT5
139.096	-0.473767	0.163548	-2.89681	0.00376977	0.074057	ENSG00000087586	AURKA
255.316	-0.375907	0.129786	-2.89636	0.00377514	0.074057	ENSG00000188171	ZNF626
283.052	-0.384851	0.132889	-2.89603	0.00377911	0.074057	ENSG00000197937	ZNF347
6110.57	0.157457	0.0543873	2.8951	0.00379038	0.0741825	ENSG00000214078	CPNE1
273.642	-0.485292	0.167696	-2.89388	0.00380519	0.0743376	ENSG00000182195	LDOC1
760.941	-0.179769	0.0621255	-2.89364	0.00380806	0.0743376	ENSG00000140006	WDR89
1108.49	0.305981	0.105765	2.89304	0.00381532	0.0743841	ENSG00000172331	BPGM
4102.98	0.107637	0.0372263	2.89141	0.00383517	0.0746756	ENSG00000145016	RUBCN
52.186	-0.466178	0.161315	-2.88985	0.00385421	0.0748851	ENSG00000108852	MPP2
623.224	-0.42875	0.148387	-2.88941	0.00385966	0.0748851	ENSG00000101842	VSIG1
83.6316	0.320669	0.110984	2.88933	0.00386066	0.0748851	ENSG00000214562	NUTM2D
1933.55	0.470907	0.163017	2.8887	0.0038684	0.0749398	ENSG00000197077	KIAA1671
41.23	-0.852301	0.295316	-2.88607	0.00390089	0.0754733	ENSG00000247627	MTND4P12
32.4887	-0.362905	0.125794	-2.88492	0.00391508	0.0756518	ENSG00000211887	TRAJ2
89.2292	-0.177906	0.0616899	-2.88387	0.00392817	0.0758086	ENSG00000165046	LETM2
35.2462	-1.02414	0.355244	-2.88292	0.0039401	0.0758606	ENSG00000181234	TMEM132C
9577.7	0.105349	0.036543	2.88286	0.00394081	0.0758606	ENSG00000089737	DDX24
980.147	-0.189909	0.0659	-2.88178	0.00395436	0.0760092	ENSG00000136261	BZW2
693.998	-0.560506	0.194522	-2.88145	0.0039585	0.0760092	ENSG00000119917	IFIT3
874.116	-0.35874	0.124578	-2.87963	0.00398138	0.0763177	ENSG00000157303	SUSD3
364.677	0.485587	0.168659	2.8791	0.00398808	0.0763177	ENSG00000060140	STYK1
2564.19	0.0839903	0.0291771	2.87863	0.00399403	0.0763177	ENSG00000168924	LETM1
6291.63	0.136403	0.0473853	2.87859	0.00399459	0.0763177	ENSG00000149428	HYOU1
363.204	-0.136041	0.0472694	-2.878	0.00400209	0.0763558	ENSG00000173436	MICOS10
356.576	-0.189533	0.0658641	-2.87764	0.0040066	0.0763558	ENSG00000145723	GIN1
75.0855	0.737162	0.256401	2.87504	0.00403982	0.0768478	ENSG00000281741	NA
567.728	-0.260326	0.0905558	-2.87476	0.00404335	0.0768478	ENSG00000130021	PUDP
437.474	0.456067	0.158663	2.87443	0.00404754	0.0768478	ENSG00000258839	MC1R
221.154	-0.18181	0.063328	-2.87092	0.00409279	0.0775664	ENSG00000144451	SPAG16
12315.4	-0.153245	0.0533925	-2.87016	0.0041026	0.0775664	ENSG00000111679	PTPN6
161.735	0.363138	0.126522	2.87015	0.00410271	0.0775664	ENSG00000233609	RPL10P19
3701.48	0.0985401	0.0343355	2.86992	0.00410574	0.0775664	ENSG00000099290	WASHC2A
7807.89	-0.381163	0.132894	-2.86817	0.00412854	0.0778292	ENSG00000184613	NELL2
1135.2	0.103099	0.0359471	2.86807	0.00412986	0.0778292	ENSG00000106100	NOD1
65.7738	-0.412969	0.144067	-2.86651	0.00415026	0.0781172	ENSG00000204314	PRRT1
1716.46	0.10699	0.0373421	2.86514	0.00416823	0.0782912	ENSG00000137824	RMDN3
92.937	-0.245529	0.0856989	-2.86502	0.00416978	0.0782912	ENSG00000235652	FBXO30-DT
687.038	0.644079	0.224917	2.86363	0.00418821	0.0785076	ENSG00000182253	SYNM
116.328	-0.583623	0.203912	-2.86213	0.00420809	0.0785076	ENSG00000029993	HMGB3
87.8666	0.553232	0.193337	2.86149	0.00421653	0.0785076	ENSG00000146197	SCUBE3
185.214	0.295555	0.103295	2.86128	0.00421934	0.0785076	ENSG00000181588	MEX3D
3139.76	-0.314156	0.109802	-2.86112	0.00422152	0.0785076	ENSG00000115687	PASK
764.51	-0.131547	0.0459778	-2.8611	0.00422172	0.0785076	ENSG00000176102	CSTF3
34.6365	-0.417221	0.145844	-2.86074	0.00422648	0.0785076	ENSG00000273174	NA
2509.15	0.0951487	0.0332607	2.86069	0.00422719	0.0785076	ENSG00000113716	HMGXB3
8570.04	0.150663	0.0526673	2.86066	0.00422765	0.0785076	ENSG00000196821	ILRUN
1737.15	0.174313	0.0609573	2.85959	0.00424186	0.0786756	ENSG00000184164	CRELD2
69.6612	0.29594	0.103607	2.85638	0.00428501	0.0793794	ENSG00000273265	CNNM3-DT
93.2754	-0.574308	0.201099	-2.85585	0.00429216	0.0794155	ENSG00000102554	KLF5
156.551	-0.415296	0.145498	-2.8543	0.00431313	0.0796461	ENSG00000087903	RFX2
1095.3	-0.451308	0.158132	-2.85399	0.00431741	0.0796461	ENSG00000135318	NT5E
4597.74	0.0996678	0.0349249	2.85378	0.0043203	0.0796461	ENSG00000137200	CMTR1
49.6262	-0.43501	0.15248	-2.85291	0.00433215	0.0797681	ENSG00000171160	MORN4
2293.14	-0.402955	0.141271	-2.85235	0.00433971	0.079811	ENSG00000157601	MX1
3688.29	-0.180131	0.0631827	-2.85096	0.00435876	0.0799848	ENSG00000140199	SLC12A6
482.143	-0.231487	0.0811982	-2.85089	0.00435966	0.0799848	ENSG00000170222	ADPRM
218.445	-0.686421	0.240854	-2.84995	0.00437265	0.0801266	ENSG00000089685	BIRC5
194.158	-0.294576	0.103469	-2.84701	0.00441317	0.0807124	ENSG00000174007	CEP19
1544.39	-0.211631	0.0743509	-2.84639	0.00442187	0.0807124	ENSG00000106733	NMRK1
63.9391	-0.420463	0.14772	-2.84636	0.0044222	0.0807124	ENSG00000227218	NA
1748.01	-0.23408	0.082246	-2.8461	0.00442579	0.0807124	ENSG00000165672	PRDX3
486.706	-0.157107	0.0552247	-2.84486	0.00444304	0.0809302	ENSG00000107371	EXOSC3
30.0173	-1.06591	0.374914	-2.84309	0.00446788	0.081192	ENSG00000268758	ADGRE4P
47.5447	-0.395494	0.139108	-2.84307	0.00446806	0.081192	ENSG00000247746	USP51
42.325	-0.327353	0.115171	-2.84232	0.00447865	0.0812384	ENSG00000259994	NA
29.3791	-0.35349	0.124389	-2.8418	0.00448597	0.0812384	ENSG00000245573	BDNF-AS
1586.65	-0.151733	0.0533988	-2.8415	0.00449023	0.0812384	ENSG00000136521	NDUFB5
2360.5	0.110897	0.039033	2.84111	0.00449575	0.0812384	ENSG00000156232	WHAMM
5828.18	0.188318	0.066286	2.841	0.00449726	0.0812384	ENSG00000114166	KAT2B
35.4338	-1.15064	0.405198	-2.8397	0.00451555	0.0814722	ENSG00000133687	TMTC1
64.901	-0.438249	0.154396	-2.83848	0.00453293	0.0816891	ENSG00000267702	NA
803.957	-0.489154	0.172354	-2.83808	0.00453864	0.0816955	ENSG00000132694	ARHGEF11
58.1072	-0.380126	0.133957	-2.83767	0.0045444	0.0817027	ENSG00000163864	NMNAT3
3332.73	-0.163931	0.0577823	-2.83705	0.00455327	0.0817658	ENSG00000120694	HSPH1
38.7057	-0.90639	0.319585	-2.83615	0.00456617	0.0818777	ENSG00000162722	TRIM58
375.04	-0.200021	0.0705328	-2.83586	0.00457024	0.0818777	ENSG00000129235	TXNDC17
8333.92	-0.149808	0.0528352	-2.83539	0.00457702	0.0819029	ENSG00000057608	GDI2
457.282	-0.189515	0.066856	-2.83467	0.00458732	0.0819853	ENSG00000156253	RWDD2B
38.8735	-1.10079	0.388406	-2.83412	0.00459524	0.0819853	ENSG00000163053	SLC16A14
513.803	-0.201338	0.0710541	-2.83359	0.0046029	0.0819853	ENSG00000136783	NIPSNAP3A
2922.65	0.100577	0.0354948	2.83357	0.00460314	0.0819853	ENSG00000163444	TMEM183A
104.547	0.459191	0.162094	2.83287	0.00461324	0.0819971	ENSG00000218018	RBM38-AS1
5371.63	-0.320073	0.112989	-2.83278	0.00461455	0.0819971	ENSG00000135426	TESPA1
4133.85	-0.345111	0.121857	-2.8321	0.0046244	0.0820764	ENSG00000149212	SESN3
250.434	-1.27939	0.451854	-2.83142	0.0046342	0.0821547	ENSG00000206172	HBA1
4640.77	0.105674	0.0373414	2.82995	0.00465555	0.0823739	ENSG00000070814	TCOF1
285.334	0.207747	0.0734141	2.82979	0.00465783	0.0823739	ENSG00000143801	PSEN2
5425.53	0.116555	0.0411934	2.82945	0.00466278	0.0823739	ENSG00000177479	ARIH2
25.5249	-0.853076	0.302162	-2.82324	0.00475413	0.0838001	ENSG00000155966	AFF2
112.046	0.375469	0.133034	2.82236	0.00476714	0.0838001	ENSG00000133962	CATSPERB
188.099	-0.202873	0.0718879	-2.82207	0.00477146	0.0838001	ENSG00000270049	ATP6V0D1-DT
948.395	-1.07576	0.381302	-2.82127	0.00478332	0.0838001	ENSG00000162747	FCGR3B
1951.14	0.247648	0.0877852	2.82107	0.00478643	0.0838001	ENSG00000159433	STARD9
809.604	-0.681163	0.241485	-2.82072	0.00479159	0.0838001	ENSG00000115271	GCA
4335.4	0.126248	0.0447575	2.82071	0.00479181	0.0838001	ENSG00000172661	WASHC2C
131.99	0.62256	0.220714	2.82066	0.00479248	0.0838001	ENSG00000214402	LCNL1
48.6226	-0.530073	0.187927	-2.82063	0.00479298	0.0838001	ENSG00000222009	BTBD19
662.358	-0.248017	0.0879675	-2.81942	0.00481106	0.083986	ENSG00000166471	TMEM41B
3659.94	-0.185496	0.0657977	-2.81918	0.00481463	0.083986	ENSG00000013810	TACC3
1471.59	0.118057	0.0418822	2.81879	0.00482048	0.083992	ENSG00000123130	ACOT9
565.902	-0.197213	0.0699773	-2.81824	0.00482881	0.0840412	ENSG00000225470	JPX
423.786	0.2947	0.104677	2.81533	0.00487268	0.084708	ENSG00000143507	DUSP10
2180.91	0.479643	0.170494	2.81325	0.00490441	0.085014	ENSG00000168209	DDIT4
239.557	-0.449778	0.159882	-2.81318	0.00490539	0.085014	ENSG00000260910	LINC00565
121.493	-0.186213	0.0661954	-2.81308	0.00490701	0.085014	ENSG00000173928	SWSAP1
584.81	-0.5293	0.188246	-2.81175	0.00492726	0.0852678	ENSG00000117724	CENPF
185.217	-0.283702	0.100916	-2.81128	0.00493447	0.0852958	ENSG00000168612	ZSWIM1
112.736	-0.293721	0.104585	-2.80845	0.00497806	0.0858594	ENSG00000261087	ZNNT1
284.891	0.577574	0.205681	2.8081	0.00498347	0.0858594	ENSG00000168255	POLR2J3
15537.6	0.135723	0.0483336	2.80805	0.00498418	0.0858594	ENSG00000116852	KIF21B
1174.3	-0.427085	0.152112	-2.8077	0.0049896	0.0858594	ENSG00000108679	LGALS3BP
92.1204	-0.344379	0.122675	-2.80724	0.00499684	0.0858871	ENSG00000280106	NA
1234.15	-0.272134	0.0969982	-2.80556	0.00502295	0.0862386	ENSG00000228716	DHFR
352.793	0.260169	0.0928112	2.8032	0.00505976	0.0867629	ENSG00000109944	JHY
99.2085	-0.553408	0.197455	-2.8027	0.00506764	0.0867629	ENSG00000112742	TTK
370.907	-0.337385	0.120386	-2.80252	0.00507056	0.0867629	ENSG00000119969	HELLS
1254.87	-0.215843	0.0770337	-2.80193	0.0050798	0.0868235	ENSG00000116791	CRYZ
17040	0.227526	0.0812372	2.80076	0.00509827	0.0870416	ENSG00000129968	ABHD17A
109.69	-0.709642	0.253412	-2.80035	0.00510475	0.0870548	ENSG00000175063	UBE2C
1270.23	-0.400782	0.143176	-2.79922	0.0051226	0.0872617	ENSG00000168961	LGALS9
873.349	-0.343622	0.122808	-2.79805	0.00514124	0.0874814	ENSG00000107736	CDH23
59.8429	-0.232914	0.0832565	-2.79754	0.00514932	0.0875212	ENSG00000231770	TMEM44-AS1
671.196	-0.298275	0.106644	-2.79693	0.00515903	0.0875886	ENSG00000111843	TMEM14C
806.613	-0.0837532	0.0299602	-2.79548	0.00518233	0.0878864	ENSG00000138286	FAM149B1
54.3237	0.525238	0.187963	2.79437	0.00520008	0.0879325	ENSG00000176945	MUC20
39.4238	-0.558469	0.199879	-2.79403	0.00520556	0.0879325	ENSG00000232224	NA
429.906	0.149697	0.0535797	2.79391	0.00520752	0.0879325	ENSG00000123444	KBTBD4
3657.17	-0.119484	0.0427664	-2.79387	0.00520812	0.0879325	ENSG00000158290	CUL4B
229.228	0.217007	0.0777044	2.79273	0.0052266	0.088039	ENSG00000104221	BRF2
25.6875	-0.531568	0.190357	-2.79247	0.00523068	0.088039	ENSG00000111057	KRT18
37.3536	-0.49975	0.178968	-2.79241	0.00523175	0.088039	ENSG00000111837	MAK
71.8406	-0.357367	0.128014	-2.79163	0.00524438	0.0881526	ENSG00000231607	DLEU2
1084.29	-0.305862	0.109578	-2.79128	0.00525007	0.0881526	ENSG00000204252	HLA-DOA
897.4	0.142154	0.0509345	2.79092	0.00525592	0.0881537	ENSG00000165138	ANKS6
567.177	-0.700025	0.250931	-2.78971	0.00527548	0.0883202	ENSG00000118515	SGK1
463.655	-0.537921	0.192842	-2.78944	0.00527992	0.0883202	ENSG00000088325	TPX2
159.343	-0.336052	0.120482	-2.78924	0.00528322	0.0883202	ENSG00000225194	LINC00092
3207.8	0.139381	0.0499869	2.78835	0.0052977	0.0884653	ENSG00000067334	DNTTIP2
62.8155	0.316658	0.113635	2.78663	0.00532591	0.088839	ENSG00000278341	NA
91.046	0.544523	0.195517	2.78504	0.00535212	0.0890645	ENSG00000119986	AVPI1
551.84	-0.504571	0.181198	-2.78463	0.00535881	0.0890645	ENSG00000164659	ELAPOR2
1317.46	-0.115917	0.041628	-2.78459	0.00535959	0.0890645	ENSG00000104231	ZFAND1
421.101	0.114948	0.0412829	2.78439	0.0053628	0.0890645	ENSG00000123352	SPATS2
292.265	-0.199998	0.0718467	-2.78368	0.00537466	0.0891644	ENSG00000203497	PDCD4-AS1
145.755	-0.735151	0.264184	-2.78273	0.00539044	0.0892947	ENSG00000060982	BCAT1
456.602	0.297862	0.10706	2.7822	0.00539916	0.0892947	ENSG00000116641	DOCK7
60.6822	-0.353217	0.126959	-2.78215	0.00540009	0.0892947	ENSG00000212127	TAS2R14
4630.68	0.138549	0.0498126	2.7814	0.00541251	0.0894032	ENSG00000134324	LPIN1
240.804	-0.199217	0.0716865	-2.779	0.00545264	0.0899685	ENSG00000183765	CHEK2
6947.88	0.169941	0.0611813	2.77767	0.00547506	0.0902409	ENSG00000143924	EML4
375.658	-0.208297	0.0750057	-2.77708	0.00548501	0.0903072	ENSG00000166263	STXBP4
531.785	-0.129906	0.0467943	-2.77611	0.0055013	0.0903161	ENSG00000112304	ACOT13
357.304	0.331089	0.119269	2.77598	0.00550351	0.0903161	ENSG00000163517	HDAC11
346.418	-0.206765	0.0744865	-2.77587	0.00550545	0.0903161	ENSG00000204390	HSPA1L
345.814	-0.228599	0.0823659	-2.77541	0.00551316	0.0903161	ENSG00000168246	UBTD2
607.635	0.103491	0.0372899	2.77529	0.00551517	0.0903161	ENSG00000148090	AUH
3155.52	0.155697	0.0561464	2.77305	0.00555327	0.0908425	ENSG00000059758	CDK17
3432.93	0.120141	0.0433366	2.77227	0.00556662	0.0909632	ENSG00000179889	PDXDC1
4365.71	0.0886335	0.0319758	2.7719	0.00557309	0.090964	ENSG00000158604	TMED4
2894.44	0.112153	0.0404692	2.77131	0.00558311	0.090964	ENSG00000124574	ABCC10
909.852	-0.16133	0.0582162	-2.77123	0.00558457	0.090964	ENSG00000240344	PPIL3
188.042	-0.618238	0.223141	-2.77062	0.00559492	0.0910354	ENSG00000138180	CEP55
1360.05	0.146039	0.05274	2.76903	0.00562231	0.0913118	ENSG00000175104	TRAF6
294.363	-0.632077	0.228274	-2.76894	0.00562389	0.0913118	ENSG00000066279	ASPM
365.178	0.290807	0.105086	2.76733	0.00565177	0.091667	ENSG00000183604	SMG1P5
3292.38	0.145969	0.0527609	2.76661	0.00566418	0.0917706	ENSG00000068903	SIRT2
3696.58	0.0943232	0.0340988	2.76617	0.00567186	0.0917974	ENSG00000033100	CHPF2
87.1141	-0.741254	0.268046	-2.7654	0.00568536	0.0919184	ENSG00000166035	LIPC
847.408	-0.459314	0.16616	-2.76429	0.00570473	0.0921338	ENSG00000166341	DCHS1
7074.04	0.146728	0.053102	2.76314	0.0057248	0.09236	ENSG00000077235	GTF3C1
210.691	0.254266	0.0920787	2.7614	0.00575545	0.0927564	ENSG00000124549	BTN2A3P
1632.72	-0.366973	0.13293	-2.76064	0.00576876	0.0928327	ENSG00000113368	LMNB1
92.2756	-0.536038	0.194204	-2.76018	0.00577695	0.0928327	ENSG00000175643	RMI2
5008.95	0.525547	0.190409	2.7601	0.00577845	0.0928327	ENSG00000183508	TENT5C
1595.81	-0.164029	0.0594564	-2.75881	0.00580125	0.0931009	ENSG00000155959	VBP1
577.655	-0.492925	0.178855	-2.756	0.00585131	0.0937033	ENSG00000138160	KIF11
2632.81	0.147667	0.0535814	2.75593	0.00585247	0.0937033	ENSG00000109670	FBXW7
560.71	0.192809	0.0699683	2.75567	0.00585723	0.0937033	ENSG00000132773	TOE1
97.9556	-0.586201	0.212826	-2.75437	0.00588058	0.0938885	ENSG00000174136	RGMB
2472.34	-0.203618	0.0739335	-2.75407	0.00588588	0.0938885	ENSG00000168214	RBPJ
121.48	-0.576566	0.209356	-2.75399	0.00588728	0.0938885	ENSG00000165304	MELK
3263.92	-0.228673	0.0831043	-2.75164	0.00592975	0.094467	ENSG00000183486	MX2
3667.36	-0.400825	0.145708	-2.75088	0.00594351	0.0945874	ENSG00000154229	PRKCA
303.435	0.174961	0.0636265	2.74982	0.00596285	0.0947963	ENSG00000226688	ENTPD1-AS1
5069.91	-0.278639	0.101369	-2.74876	0.00598207	0.0950008	ENSG00000142546	NOSIP
1656.07	-0.176265	0.0641336	-2.74841	0.00598855	0.0950008	ENSG00000009844	VTA1
845.107	-0.086861	0.0316078	-2.74809	0.00599441	0.0950008	ENSG00000136319	TTC5
276.376	-0.307179	0.111849	-2.74638	0.00602564	0.0953967	ENSG00000116771	AGMAT
666.402	0.105653	0.0384935	2.74469	0.00605673	0.0957893	ENSG00000100564	PIGH
1191.82	0.426894	0.15557	2.74406	0.00606838	0.0958565	ENSG00000146674	IGFBP3
1659.78	0.206394	0.0752492	2.74281	0.00609155	0.0958565	ENSG00000136770	DNAJC1
4416.51	0.202779	0.0739323	2.74277	0.00609231	0.0958565	ENSG00000127824	TUBA4A
2778.86	0.0923514	0.0336759	2.74236	0.00610001	0.0958565	ENSG00000161204	ABCF3
7817.06	0.339543	0.123823	2.74215	0.00610381	0.0958565	ENSG00000180739	S1PR5
2840.86	0.0854303	0.0311548	2.74212	0.00610442	0.0958565	ENSG00000175931	UBE2O
28.6257	-1.26851	0.46263	-2.74195	0.00610758	0.0958565	ENSG00000089199	CHGB
49.0035	0.611544	0.223061	2.7416	0.006114	0.0958565	ENSG00000188886	ASTL
111.045	-0.346994	0.126575	-2.74141	0.00611757	0.0958565	ENSG00000249667	LINC01259
2636.83	0.0981148	0.035797	2.74086	0.0061278	0.0958764	ENSG00000141580	WDR45B
11702.5	0.244618	0.0892645	2.74037	0.00613692	0.0958764	ENSG00000158717	RNF166
36.57	-0.356775	0.130194	-2.74033	0.0061377	0.0958764	ENSG00000154025	SLC5A10
1065.18	-0.0864108	0.0315448	-2.73931	0.00615685	0.0959141	ENSG00000100442	FKBP3
68.5982	0.555378	0.202752	2.73921	0.00615877	0.0959141	ENSG00000109686	SH3D19
51.0392	0.39917	0.145725	2.73919	0.00615898	0.0959141	ENSG00000276523	NA
800.061	-0.216044	0.0788953	-2.73837	0.00617453	0.0960131	ENSG00000155393	HEATR3
95.657	-0.52969	0.193446	-2.73818	0.00617794	0.0960131	ENSG00000005513	SOX8
1105.84	-0.193066	0.0705309	-2.73733	0.00619406	0.0961656	ENSG00000124243	BCAS4
128.891	0.883074	0.322819	2.73551	0.00622839	0.0965952	ENSG00000167914	GSDMA
1308.14	0.101105	0.0369659	2.73508	0.00623643	0.0965952	ENSG00000132286	TIMM10B
62.0875	-0.694636	0.253994	-2.73486	0.00624074	0.0965952	ENSG00000170293	CMTM8
291.452	-0.510782	0.18683	-2.73395	0.006258	0.0967641	ENSG00000176890	TYMS
1438.17	0.160684	0.0588235	2.73163	0.00630227	0.0971576	ENSG00000162775	RBM15
539.319	-0.13431	0.0491723	-2.73141	0.00630641	0.0971576	ENSG00000144401	METTL21A
32.1574	0.545422	0.199691	2.73133	0.00630792	0.0971576	ENSG00000136274	NACAD
1437.28	0.20106	0.073614	2.73128	0.00630893	0.0971576	ENSG00000198885	ITPRIPL1
111.421	-0.34328	0.125708	-2.73077	0.00631859	0.097208	ENSG00000154102	C16orf74
44.58	-1.10532	0.404877	-2.73002	0.00633301	0.0973317	ENSG00000148926	ADM
571.012	0.0918351	0.0336554	2.72869	0.00635865	0.0976274	ENSG00000132664	POLR3F
763.723	-0.225891	0.0828236	-2.72738	0.00638394	0.0976483	ENSG00000103351	CLUAP1
5734.08	-0.218598	0.080156	-2.72715	0.00638831	0.0976483	ENSG00000177663	IL17RA
117.644	-0.643609	0.236013	-2.727	0.00639123	0.0976483	ENSG00000072571	HMMR
1057.53	0.106045	0.0388909	2.72674	0.00639634	0.0976483	ENSG00000100150	DEPDC5
2357.32	-0.196163	0.0719414	-2.72671	0.00639697	0.0976483	ENSG00000172766	NAA16
221.663	-0.234348	0.0859476	-2.72663	0.00639844	0.0976483	ENSG00000204923	FBXO48
385.663	0.21071	0.0773017	2.72582	0.00641424	0.0976986	ENSG00000198205	ZXDA
632.348	-0.162258	0.0595268	-2.7258	0.00641456	0.0976986	ENSG00000198056	PRIM1
29.1127	-0.401621	0.147458	-2.72363	0.00645689	0.098188	ENSG00000271680	NA
546.776	-0.453289	0.166437	-2.72349	0.00645957	0.098188	ENSG00000053918	KCNQ1
7864.55	-0.267083	0.0980925	-2.72277	0.00647373	0.0983053	ENSG00000245164	LINC00861
186.952	-0.69411	0.255293	-2.71888	0.0065503	0.099369	ENSG00000126787	DLGAP5
563.972	-0.175001	0.064381	-2.7182	0.00656373	0.0994737	ENSG00000106399	RPA3
3548.03	0.0866712	0.0318963	2.71728	0.00658214	0.0996283	ENSG00000132153	DHX30
7184.59	0.178896	0.0658481	2.7168	0.00659173	0.0996283	ENSG00000071894	CPSF1
182.072	-0.476973	0.17557	-2.71671	0.00659353	0.0996283	ENSG00000237914	SIRPG-AS1
963.938	0.211503	0.0778738	2.71597	0.00660818	0.0997507	ENSG00000143126	CELSR2
735.711	-0.433956	0.159839	-2.71496	0.00662846	0.0999579	ENSG00000198520	ARMH1
5460.19	0.126538	0.0466171	2.71441	0.00663941	0.100024	ENSG00000136819	C9orf78
49.2387	-0.249591	0.0919842	-2.71341	0.00665949	0.100157	ENSG00000171757	LRRC34
408.987	0.407632	0.150234	2.71332	0.00666135	0.100157	ENSG00000148600	CDHR1
183.62	-0.210167	0.0775356	-2.71059	0.00671643	0.100684	ENSG00000259877	NA
741.838	-0.174145	0.0642477	-2.71053	0.00671768	0.100684	ENSG00000115514	TXNDC9
1522.88	-0.103636	0.0382366	-2.71039	0.00672038	0.100684	ENSG00000196510	ANAPC7
1572.57	-0.130262	0.0480623	-2.71027	0.00672283	0.100684	ENSG00000005175	RPAP3
49.5217	0.247965	0.0915039	2.70988	0.0067307	0.100703	ENSG00000272153	NA
162.648	-0.600925	0.221834	-2.70889	0.00675078	0.100778	ENSG00000189057	FAM111B
169.184	-1.12456	0.415181	-2.7086	0.00675686	0.100778	ENSG00000088827	SIGLEC1
2222.4	0.295682	0.109178	2.70826	0.00676369	0.100778	ENSG00000162104	ADCY9
3421.77	0.275857	0.101864	2.70808	0.00676737	0.100778	ENSG00000184205	TSPYL2
3796.72	0.195443	0.0721737	2.70795	0.00676997	0.100778	ENSG00000276045	ORAI1
5849.65	0.114321	0.0422208	2.70769	0.00677539	0.100778	ENSG00000135090	TAOK3
123.738	-0.612642	0.226338	-2.70675	0.00679446	0.100963	ENSG00000274752	TRBV12-3
369.197	-0.399139	0.147598	-2.70423	0.00684622	0.101563	ENSG00000101773	RBBP8
990.561	-0.220824	0.0816705	-2.70383	0.00685445	0.101563	ENSG00000102409	BEX4
967.911	-0.598412	0.221321	-2.70382	0.0068548	0.101563	ENSG00000131747	TOP2A
49.4894	-0.538678	0.1993	-2.70285	0.00687486	0.101761	ENSG00000280119	LOC285097
808.262	-0.232077	0.0858808	-2.70231	0.00688587	0.101825	ENSG00000121486	TRMT1L
11177.3	0.163319	0.0604504	2.70171	0.00689845	0.101889	ENSG00000138767	CNOT6L
766.923	-0.14257	0.0527752	-2.70146	0.00690356	0.101889	ENSG00000155893	PXYLP1
2659.67	0.164301	0.0608362	2.70072	0.006919	0.102018	ENSG00000168758	SEMA4C
504.173	0.126303	0.0467787	2.70002	0.00693353	0.102134	ENSG00000232559	NA
195.089	1.0737	0.397827	2.69892	0.00695656	0.102343	ENSG00000115112	TFCP2L1
1862.74	0.160575	0.0595008	2.6987	0.00696114	0.102343	ENSG00000116044	NFE2L2
14811.8	0.101842	0.0377433	2.69828	0.00696979	0.102371	ENSG00000003402	CFLAR
236.083	0.31928	0.118366	2.69739	0.00698852	0.102471	ENSG00000169918	OTUD7A
124.8	-0.489632	0.181535	-2.69718	0.00699292	0.102471	ENSG00000078081	LAMP3
4188.87	0.248602	0.0921822	2.69686	0.00699967	0.102471	ENSG00000171522	PTGER4
1341.76	-0.0889563	0.0329873	-2.69668	0.00700347	0.102471	ENSG00000124532	MRS2
95.471	-0.592114	0.219735	-2.69467	0.00704577	0.102991	ENSG00000143797	MBOAT2
3659.15	-0.0848476	0.0314981	-2.69374	0.00706559	0.103182	ENSG00000109180	OCIAD1
35.4533	0.655204	0.243317	2.6928	0.00708549	0.103317	ENSG00000258732	NA
408.48	-0.159415	0.0592036	-2.69266	0.00708842	0.103317	ENSG00000256223	ZNF10
152.539	-0.539364	0.20035	-2.6921	0.00710027	0.103391	ENSG00000171241	SHCBP1
25.6753	0.417736	0.15519	2.69178	0.00710719	0.103393	ENSG00000128482	RNF112
5460.37	0.0959081	0.0356368	2.69127	0.00711812	0.103454	ENSG00000196396	PTPN1
169.867	-1.14457	0.42593	-2.68723	0.0072047	0.104468	ENSG00000272398	CD24
3016.84	0.200871	0.0747558	2.68702	0.00720917	0.104468	ENSG00000140563	MCTP2
158.675	-0.549828	0.204639	-2.68682	0.00721363	0.104468	ENSG00000131153	GINS2
4282.07	0.149586	0.0556758	2.68674	0.00721533	0.104468	ENSG00000096996	IL12RB1
88.177	-0.72282	0.269068	-2.68638	0.00722311	0.104481	ENSG00000118193	KIF14
8145.38	0.24736	0.0921185	2.68524	0.00724783	0.10474	ENSG00000007264	MATK
10966.9	-0.164243	0.0611846	-2.68439	0.00726617	0.104867	ENSG00000162704	ARPC5
117.787	0.33279	0.123981	2.6842	0.00727039	0.104867	ENSG00000116675	DNAJC6
4127.92	-0.187312	0.0697975	-2.68365	0.00728231	0.10494	ENSG00000204387	SNHG32
74.4603	-1.12998	0.421249	-2.68245	0.0073085	0.105156	ENSG00000165617	DACT1
1206.75	-0.525198	0.195809	-2.6822	0.00731393	0.105156	ENSG00000147408	CSGALNACT1
269.64	-0.123209	0.0459391	-2.68201	0.00731805	0.105156	ENSG00000127720	METTL25
2724.9	0.407	0.151813	2.68092	0.00734195	0.105401	ENSG00000148841	ITPRIP
112.332	0.28178	0.105122	2.68051	0.00735096	0.105431	ENSG00000253816	GUSBP14
670.128	-0.246553	0.0919959	-2.68004	0.00736132	0.105465	ENSG00000245060	LINC00847
82.0301	-0.193082	0.0720515	-2.67977	0.00736719	0.105465	ENSG00000267106	ZNF561-AS1
2072.14	-0.175678	0.0655849	-2.67863	0.00739237	0.105726	ENSG00000086712	TXLNG
1378.46	-0.120792	0.0451018	-2.6782	0.00740187	0.105763	ENSG00000146963	LUC7L2
363.16	-0.630688	0.235544	-2.67758	0.00741567	0.105861	ENSG00000101057	MYBL2
5252.43	0.25848	0.0965685	2.67665	0.00743631	0.106032	ENSG00000132819	RBM38
74.3258	-0.291917	0.109084	-2.67607	0.00744915	0.106032	ENSG00000233836	NA
732.483	-0.138271	0.051676	-2.67572	0.00745685	0.106032	ENSG00000082146	STRADB
188.073	-0.319934	0.119585	-2.67537	0.00746463	0.106032	ENSG00000070087	PFN2
3403.79	0.112895	0.0422012	2.67515	0.00746955	0.106032	ENSG00000136807	CDK9
92.2257	-0.285631	0.106791	-2.67467	0.00748039	0.106032	ENSG00000256806	C17orf100
2920.91	0.300048	0.112187	2.67453	0.0074833	0.106032	ENSG00000196914	ARHGEF12
1147.2	-0.132964	0.0497177	-2.67437	0.00748689	0.106032	ENSG00000146842	TMEM209
92.3983	-0.550018	0.205674	-2.67422	0.00749028	0.106032	ENSG00000213420	GPC2
34.2406	-0.314473	0.117622	-2.6736	0.00750419	0.106131	ENSG00000228857	ACTR3-AS1
283.084	-0.175691	0.065762	-2.67162	0.00754854	0.106659	ENSG00000159055	MIS18A
10013.4	-0.116435	0.0436035	-2.67031	0.00757808	0.106791	ENSG00000082898	XPO1
54.646	0.193835	0.0725893	2.67029	0.00757854	0.106791	ENSG00000260274	NA
1882.82	0.15128	0.0566534	2.67028	0.00757891	0.106791	ENSG00000168792	ABHD15
7675.48	0.215224	0.0806183	2.66967	0.00759264	0.106801	ENSG00000132359	RAP1GAP2
842.564	0.165561	0.0620167	2.66962	0.00759363	0.106801	ENSG00000109220	CHIC2
1450.88	-0.152781	0.0572674	-2.66785	0.00763376	0.107145	ENSG00000170142	UBE2E1
81.1458	0.195815	0.0733998	2.66779	0.00763522	0.107145	ENSG00000279495	NA
684.488	-0.134034	0.0502479	-2.66746	0.00764263	0.107145	ENSG00000159596	TMEM69
16414.9	-0.153419	0.0575182	-2.66731	0.00764622	0.107145	ENSG00000115091	ACTR3
44.5468	-0.722125	0.270777	-2.66686	0.00765632	0.107189	ENSG00000168078	NA
105.411	-1.37084	0.51424	-2.66575	0.00768165	0.107429	ENSG00000133048	CHI3L1
1031.38	-0.0697952	0.0261875	-2.66521	0.007694	0.107429	ENSG00000131269	ABCB7
238.707	-0.160942	0.0603974	-2.66472	0.00770531	0.107429	ENSG00000163319	MRPS18C
3138.44	-0.18197	0.0683013	-2.66423	0.00771658	0.107429	ENSG00000177565	TBL1XR1
86.8313	0.230906	0.0866761	2.66401	0.00772156	0.107429	ENSG00000280254	NA
25.2072	-0.50494	0.189542	-2.66399	0.00772191	0.107429	ENSG00000254802	NA
5716.94	-0.147851	0.0555007	-2.66395	0.00772285	0.107429	ENSG00000131507	NDFIP1
11793.2	0.289212	0.108603	2.66302	0.00774419	0.107628	ENSG00000069702	TGFBR3
1474.28	0.156568	0.058837	2.66104	0.00778991	0.108165	ENSG00000104142	VPS18
937.945	-0.144811	0.0544367	-2.66018	0.00780991	0.108305	ENSG00000088766	CRLS1
369.483	-0.190324	0.0715555	-2.6598	0.00781861	0.108305	ENSG00000165244	ZNF367
242.48	-0.283448	0.106572	-2.65969	0.0078213	0.108305	ENSG00000155099	PIP4P2
223.689	-0.512068	0.1926	-2.65871	0.00784404	0.108477	ENSG00000137812	KNL1
99.2315	0.728876	0.274164	2.65854	0.00784798	0.108477	ENSG00000279141	LINC01451
4420.71	-0.131907	0.0496323	-2.65768	0.00786807	0.108656	ENSG00000112062	MAPK14
327.523	-0.267798	0.100789	-2.65701	0.00788365	0.108773	ENSG00000198417	MT1F
70.1239	-0.286455	0.107865	-2.65567	0.00791507	0.109108	ENSG00000213160	KLHL23
296.048	0.154547	0.0582152	2.65474	0.00793687	0.109309	ENSG00000165121	NA
434.622	0.258456	0.0974011	2.65353	0.00796552	0.10957	ENSG00000076604	TRAF4
82.0121	-0.53061	0.199979	-2.65333	0.00797018	0.10957	ENSG00000240954	RPL4P1
6675.78	0.125094	0.0471605	2.65251	0.00798955	0.109738	ENSG00000159842	ABR
629.36	-0.177988	0.0671152	-2.65198	0.00800206	0.10981	ENSG00000106477	CEP41
68.1729	-0.638293	0.240742	-2.65135	0.00801701	0.109917	ENSG00000165480	SKA3
7607.04	0.178139	0.0672026	2.65077	0.00803076	0.110006	ENSG00000109787	KLF3
24.7953	0.868246	0.327606	2.65027	0.00804271	0.110009	ENSG00000203616	RHOT1P2
10905.4	0.172201	0.0649775	2.65016	0.00804543	0.110009	ENSG00000185187	SIGIRR
225.841	0.168466	0.0635825	2.64956	0.00805957	0.110104	ENSG00000171574	ZNF584
251.744	-0.558556	0.210852	-2.64905	0.00807195	0.110174	ENSG00000101162	TUBB1
509.919	-0.167978	0.0635193	-2.64452	0.00818073	0.111559	ENSG00000196511	TPK1
462.546	-0.182422	0.0690254	-2.64283	0.00822167	0.111974	ENSG00000171055	FEZ2
200.624	-0.243584	0.092174	-2.64266	0.0082258	0.111974	ENSG00000154016	GRAP
65.2372	0.372958	0.141213	2.64111	0.00826353	0.112387	ENSG00000264918	NA
1299.73	-0.0958075	0.0362844	-2.64046	0.00827933	0.112452	ENSG00000204178	MACO1
150.795	-0.530752	0.201019	-2.64031	0.0082831	0.112452	ENSG00000005249	PRKAR2B
318.731	-0.375146	0.142135	-2.63937	0.00830607	0.112664	ENSG00000173638	SLC19A1
746.279	-0.471661	0.178725	-2.63903	0.00831425	0.112675	ENSG00000162804	SNED1
37.3064	0.295285	0.111905	2.6387	0.00832254	0.112687	ENSG00000271314	NA
2707.32	-0.117806	0.0446515	-2.63835	0.008331	0.112701	ENSG00000119906	SLF2
481.454	-0.14721	0.0558224	-2.63711	0.00836158	0.113015	ENSG00000113272	THG1L
1044.32	0.113154	0.0429222	2.63626	0.00838258	0.113188	ENSG00000178105	DDX10
314.89	-0.673623	0.255549	-2.63599	0.00838928	0.113188	ENSG00000161921	CXCL16
58.0016	-1.30963	0.496951	-2.63534	0.00840539	0.113306	ENSG00000110203	FOLR3
2209.52	0.0825553	0.0313377	2.63437	0.00842927	0.113527	ENSG00000140992	PDPK1
737.387	0.326528	0.123982	2.63367	0.00844665	0.113541	ENSG00000008300	CELSR3
838.981	-0.114991	0.0436656	-2.63345	0.00845221	0.113541	ENSG00000232119	MCTS1
997.179	-0.631041	0.239627	-2.63343	0.00845267	0.113541	ENSG00000204472	AIF1
838.274	0.401477	0.152479	2.633	0.00846341	0.113586	ENSG00000184545	DUSP8
29.2044	-0.344818	0.131015	-2.6319	0.00849092	0.113841	ENSG00000197181	PIWIL2
3416.94	0.215483	0.0818943	2.63123	0.00850764	0.113841	ENSG00000007944	MYLIP
1087.05	0.130807	0.0497136	2.63121	0.00850822	0.113841	ENSG00000151065	DCP1B
124.212	-0.487749	0.185416	-2.63056	0.00852439	0.113841	ENSG00000100162	CENPM
7658.78	-0.161196	0.0612818	-2.6304	0.0085284	0.113841	ENSG00000167460	TPM4
76.9019	-0.414181	0.157463	-2.63035	0.00852973	0.113841	ENSG00000269821	KCNQ1OT1
68.6881	-0.391834	0.148993	-2.62989	0.00854121	0.113841	ENSG00000127364	TAS2R4
65.1041	-0.612719	0.232986	-2.62985	0.0085422	0.113841	ENSG00000140534	TICRR
1577.94	-0.162444	0.0617982	-2.62863	0.00857308	0.114113	ENSG00000204370	SDHD
348.833	-0.194868	0.0741381	-2.62845	0.00857759	0.114113	ENSG00000140416	TPM1
41.6823	-0.561613	0.21381	-2.62669	0.00862192	0.114603	ENSG00000109674	NEIL3
1125.65	0.163078	0.0621103	2.62562	0.00864901	0.114863	ENSG00000141994	DUS3L
34.4791	-0.450753	0.171721	-2.62491	0.00866719	0.114911	ENSG00000167554	ZNF610
5903.46	0.332226	0.126567	2.62489	0.00866769	0.114911	ENSG00000163508	EOMES
376.302	-0.224269	0.0854825	-2.62357	0.00870139	0.115257	ENSG00000183605	SFXN4
1670.22	-0.126482	0.0482305	-2.62246	0.00872982	0.115472	ENSG00000090989	EXOC1
446.149	0.242353	0.0924297	2.62202	0.008741	0.115472	ENSG00000172409	CLP1
28.967	-0.305151	0.116391	-2.62177	0.00874754	0.115472	ENSG00000211877	TRAJ12
925.27	-0.14519	0.0553789	-2.62175	0.00874786	0.115472	ENSG00000138660	AP1AR
93.0612	0.196524	0.0749923	2.62059	0.0087778	0.115767	ENSG00000108448	TRIM16L
55.2401	0.383708	0.146472	2.61967	0.00880147	0.115979	ENSG00000260727	SLC7A5P1
101.962	-0.429308	0.163943	-2.61864	0.00882821	0.116162	ENSG00000111247	RAD51AP1
24.941	-0.379662	0.145	-2.61836	0.0088354	0.116162	ENSG00000225265	TAF1A-AS1
1508.6	-0.119843	0.045772	-2.61825	0.00883826	0.116162	ENSG00000005194	CIAPIN1
968.638	0.219426	0.0838294	2.61753	0.00885695	0.116307	ENSG00000173276	ZBTB21
386.66	0.266221	0.101726	2.61704	0.00886947	0.116372	ENSG00000159164	SV2A
1843.98	0.149523	0.0571464	2.61648	0.00888414	0.116464	ENSG00000196810	CTBP1-DT
29.8402	0.666393	0.254805	2.61531	0.00891469	0.116678	ENSG00000261866	NA
77.2149	-0.261053	0.0998294	-2.61499	0.00892291	0.116678	ENSG00000260992	DOCK9-DT
170.547	-0.531048	0.203124	-2.6144	0.00893842	0.116678	ENSG00000163808	KIF15
1929.25	-0.337042	0.128919	-2.61437	0.00893922	0.116678	ENSG00000171298	GAA
79.639	-0.247554	0.094695	-2.61422	0.0089431	0.116678	ENSG00000257167	TMPO-AS1
6242.37	0.222003	0.0849252	2.6141	0.00894641	0.116678	ENSG00000134107	BHLHE40
44.8576	-1.18717	0.454238	-2.61353	0.00896114	0.11677	ENSG00000170956	CEACAM3
139.501	-0.401827	0.153782	-2.61296	0.0089762	0.116867	ENSG00000204271	SPIN3
2479.25	-0.221849	0.0849991	-2.61002	0.00905381	0.117777	ENSG00000106460	TMEM106B
1240.8	-0.111638	0.0427844	-2.60932	0.00907223	0.117916	ENSG00000136518	ACTL6A
2326.46	0.0880819	0.0337651	2.60866	0.00908965	0.118042	ENSG00000072803	FBXW11
5840.13	0.113841	0.0436494	2.60807	0.00910546	0.118076	ENSG00000173039	RELA
171.587	-0.525304	0.201444	-2.60769	0.00911542	0.118076	ENSG00000109805	NCAPG
6555.6	-0.175698	0.0673769	-2.60769	0.00911557	0.118076	ENSG00000185862	EVI2B
30.4521	0.37026	0.142006	2.60735	0.0091245	0.118092	ENSG00000223573	TINCR
315.159	-0.281835	0.108116	-2.60678	0.0091398	0.118189	ENSG00000196172	ZNF681
100.045	0.2408	0.0923989	2.60609	0.00915821	0.118327	ENSG00000163995	ABLIM2
2779.43	0.100223	0.0384673	2.60541	0.00917654	0.118464	ENSG00000105856	HBP1
36.6395	0.510562	0.196069	2.604	0.00921431	0.118851	ENSG00000158806	NPM2
131.797	-0.563344	0.216374	-2.60356	0.0092261	0.118902	ENSG00000010030	ETV7
1247.11	0.206056	0.0791609	2.60301	0.00924103	0.118987	ENSG00000119950	MXI1
29.5857	-0.445383	0.171121	-2.60274	0.00924831	0.118987	ENSG00000121690	DEPDC7
70.211	-0.478018	0.18379	-2.6009	0.00929807	0.119468	ENSG00000232354	VIPR1-AS1
186.296	-0.671017	0.258017	-2.60066	0.00930433	0.119468	ENSG00000211724	TRBV6-6
743.273	-0.126025	0.0484622	-2.60049	0.0093092	0.119468	ENSG00000162600	OMA1
42.0471	0.711351	0.273596	2.6	0.0093223	0.119536	ENSG00000215156	NA
151.177	-0.568525	0.218734	-2.59916	0.00934514	0.119728	ENSG00000135476	ESPL1
214.518	0.279554	0.107591	2.5983	0.00936856	0.119927	ENSG00000253251	SHLD3
5822.28	0.149912	0.0577198	2.59725	0.00939748	0.120089	ENSG00000124203	ZNF831
5322.54	0.161004	0.0619934	2.59712	0.00940095	0.120089	ENSG00000084112	SSH1
976.861	0.127397	0.049056	2.59698	0.00940481	0.120089	ENSG00000019995	ZRANB1
4665.08	0.140776	0.0542192	2.59642	0.0094201	0.120183	ENSG00000183354	KIAA2026
229.159	-0.22266	0.0857735	-2.59591	0.00943413	0.120261	ENSG00000138346	DNA2
693.002	0.131684	0.0507468	2.59492	0.00946123	0.12048	ENSG00000176148	TCP11L1
1677.03	0.105165	0.0405323	2.59461	0.00946985	0.12048	ENSG00000131778	CHD1L
1022.93	-0.236762	0.0912581	-2.59442	0.00947495	0.12048	ENSG00000165097	KDM1B
4056.32	0.307435	0.118596	2.59228	0.00953411	0.121131	ENSG00000116667	C1orf21
838.779	-0.215582	0.0831839	-2.59163	0.00955215	0.121173	ENSG00000117151	CTBS
1211.9	-0.294685	0.113708	-2.59159	0.00955334	0.121173	ENSG00000271856	LINC01215
5681.91	0.300117	0.115842	2.59074	0.0095771	0.121374	ENSG00000181104	F2R
4304.66	0.124737	0.0481786	2.58905	0.0096241	0.121753	ENSG00000173011	TADA2B
4766.93	0.19817	0.0765483	2.58882	0.00963042	0.121753	ENSG00000109736	MFSD10
1245.22	-0.097368	0.0376134	-2.58865	0.00963524	0.121753	ENSG00000137500	CCDC90B
1679.22	0.0971355	0.0375275	2.58838	0.00964279	0.121753	ENSG00000151532	VTI1A
1952.36	-0.144227	0.0557282	-2.58805	0.00965217	0.121753	ENSG00000144848	ATG3
2896.56	0.101348	0.0391619	2.58793	0.0096555	0.121753	ENSG00000097007	ABL1
85.9803	0.313062	0.12099	2.58751	0.00966738	0.121753	ENSG00000197696	NMB
30.5913	0.476401	0.184125	2.58738	0.00967092	0.121753	ENSG00000154240	CEP112
18046.8	-0.153813	0.059471	-2.58635	0.0096999	0.122017	ENSG00000082074	FYB1
432.263	-0.145387	0.0562394	-2.58514	0.00973385	0.122255	ENSG00000153037	SRP19
782.078	0.112743	0.0436153	2.58494	0.00973972	0.122255	ENSG00000135622	SEMA4F
487.559	-0.440281	0.170333	-2.58482	0.00974288	0.122255	ENSG00000137804	NUSAP1
775.179	-0.183296	0.0709333	-2.58406	0.0097644	0.122361	ENSG00000090263	MRPS33
304.794	0.33928	0.131302	2.58396	0.00976738	0.122361	ENSG00000088881	EBF4
546.593	-0.123845	0.0479407	-2.5833	0.00978595	0.122493	ENSG00000121775	TMEM39B
332.351	-0.218637	0.0846518	-2.58278	0.00980074	0.122578	ENSG00000112578	BYSL
32.4755	-0.640047	0.247901	-2.58186	0.00982692	0.122651	ENSG00000121211	MND1
219.389	-0.210299	0.0814565	-2.58173	0.00983068	0.122651	ENSG00000205593	DENND6B
24.0031	1.10204	0.426882	2.58162	0.00983392	0.122651	ENSG00000169071	ROR2
107.569	-0.239397	0.0927387	-2.58141	0.00983966	0.122651	ENSG00000205930	C21orf62-AS1
25.9836	-0.747162	0.28947	-2.58114	0.00984748	0.122651	ENSG00000119862	LGALSL
592.292	0.147713	0.0572336	2.58088	0.00985488	0.122651	ENSG00000137842	TMEM62
388.221	0.252501	0.097898	2.57922	0.00990225	0.123052	ENSG00000049246	PER3
1813.87	-0.127096	0.0492776	-2.57919	0.00990323	0.123052	ENSG00000143376	SNX27
345.434	0.269654	0.104609	2.57773	0.0099451	0.12338	ENSG00000162437	RAVER2
80.0107	-0.222196	0.086199	-2.57771	0.00994581	0.12338	ENSG00000279696	NA
65.5372	0.362754	0.140828	2.57587	0.00999882	0.123878	ENSG00000272078	NA
3270.49	-0.301691	0.117127	-2.57575	0.0100022	0.123878	ENSG00000154358	OBSCN
359.849	0.589406	0.228947	2.57442	0.0100408	0.124209	ENSG00000276070	CCL4L2
1045.12	-0.242567	0.0942276	-2.57427	0.0100452	0.124209	ENSG00000163600	ICOS
202.287	-1.21387	0.471635	-2.57375	0.0100603	0.124295	ENSG00000196549	MME
536.148	-0.133646	0.051963	-2.57194	0.010113	0.124695	ENSG00000155636	RBM45
1070.05	0.237369	0.0922936	2.57189	0.0101145	0.124695	ENSG00000205476	CCDC85C
1423.68	0.140728	0.0547196	2.5718	0.0101173	0.124695	ENSG00000167077	MEI1
174.585	0.916114	0.356274	2.57137	0.0101296	0.124708	ENSG00000215559	ANKRD20A11P
85.5959	-0.310841	0.120894	-2.57118	0.0101353	0.124708	ENSG00000260296	NA
23892.1	0.367899	0.1431	2.57092	0.0101429	0.124708	ENSG00000121966	CXCR4
417.409	-0.151739	0.0590392	-2.57015	0.0101656	0.124832	ENSG00000146143	PRIM2
7244.37	-0.130408	0.0507421	-2.57002	0.0101693	0.124832	ENSG00000186298	PPP1CC
492.39	0.357488	0.13914	2.56927	0.0101914	0.124927	ENSG00000149557	FEZ1
2482.24	0.202446	0.0787973	2.5692	0.0101934	0.124927	ENSG00000139722	VPS37B
243.307	0.209335	0.0815214	2.56786	0.0102329	0.125295	ENSG00000204316	MRPL38
2227.87	0.113044	0.0440268	2.56762	0.0102399	0.125295	ENSG00000143373	ZNF687
141.866	0.214005	0.0833598	2.56725	0.010251	0.12533	ENSG00000242612	DECR2
755.087	-0.234563	0.091385	-2.56676	0.0102653	0.125405	ENSG00000138439	FAM117B
108.976	-0.999889	0.38997	-2.56401	0.0103469	0.126212	ENSG00000112299	VNN1
5273.09	0.179477	0.0699994	2.56398	0.0103479	0.126212	ENSG00000126804	ZBTB1
1270.77	-0.180738	0.0705058	-2.56344	0.010364	0.126223	ENSG00000151135	TMEM263
523.951	-0.24515	0.0956349	-2.56339	0.0103654	0.126223	ENSG00000116396	KCNC4
32.9332	-0.363094	0.141672	-2.56291	0.0103799	0.126298	ENSG00000143375	CGN
77.0238	0.428663	0.167322	2.56191	0.0104099	0.12651	ENSG00000256427	NA
91.9349	-0.257731	0.100609	-2.5617	0.010416	0.12651	ENSG00000246084	LINC02325
3689.77	-0.37971	0.14824	-2.56144	0.0104238	0.12651	ENSG00000136997	MYC
52.4722	-0.363337	0.141861	-2.56122	0.0104305	0.12651	ENSG00000246582	TNFRSF10A-DT
1114.51	-0.107697	0.0420623	-2.56043	0.0104543	0.12664	ENSG00000111726	CMAS
36.5448	0.401117	0.156675	2.56019	0.0104615	0.12664	ENSG00000011105	TSPAN9
10468.1	0.114001	0.0445341	2.55985	0.0104718	0.12664	ENSG00000005483	KMT2E
689.53	-0.219047	0.0855731	-2.55976	0.0104744	0.12664	ENSG00000033170	FUT8
85.0606	-0.38735	0.151414	-2.55822	0.010521	0.127103	ENSG00000111665	CDCA3
3411.96	-0.171481	0.0670387	-2.55794	0.0105294	0.127103	ENSG00000181896	ZNF101
7708.47	0.121735	0.0476322	2.55573	0.0105966	0.127813	ENSG00000123240	OPTN
18685.2	0.137053	0.0536345	2.55531	0.0106092	0.127864	ENSG00000015133	CCDC88C
414.992	0.247347	0.0968554	2.55378	0.0106561	0.128244	ENSG00000213071	LPAL2
175.069	-0.201195	0.0787847	-2.55373	0.0106575	0.128244	ENSG00000137747	TMPRSS13
2487.64	-0.195152	0.0764377	-2.55308	0.0106775	0.128314	ENSG00000174695	TMEM167A
850.91	-0.16388	0.0641971	-2.55276	0.0106872	0.128314	ENSG00000143457	GOLPH3L
128.231	-0.594074	0.232722	-2.55272	0.0106886	0.128314	ENSG00000211812	TRAV26-2
9107.09	0.0699988	0.0274319	2.55173	0.0107189	0.12843	ENSG00000241973	PI4KA
65.5074	-0.418332	0.163958	-2.55145	0.0107274	0.12843	ENSG00000115423	DNAH6
126.089	0.187294	0.0734092	2.55138	0.0107299	0.12843	ENSG00000153982	GDPD1
1336.89	-0.441387	0.173008	-2.55125	0.0107337	0.12843	ENSG00000142192	APP
2875.49	0.167388	0.0656156	2.55103	0.0107404	0.12843	ENSG00000132361	CLUH
1482.04	0.172931	0.067852	2.54865	0.0108142	0.129194	ENSG00000130758	MAP3K10
117.131	-0.214628	0.0842202	-2.54842	0.0108212	0.129194	ENSG00000124787	RPP40
443.737	-0.394047	0.154647	-2.54804	0.0108332	0.129235	ENSG00000033627	ATP6V0A1
2795.85	0.111019	0.0435752	2.54775	0.010842	0.12924	ENSG00000162413	KLHL21
168.25	-0.290633	0.114087	-2.54747	0.0108508	0.129243	ENSG00000111644	ACRBP
133.163	-0.477093	0.187306	-2.54713	0.0108613	0.129267	ENSG00000185304	RGPD2
485.963	-0.144615	0.0567914	-2.54642	0.0108833	0.129428	ENSG00000149089	APIP
1584.23	0.131132	0.0515178	2.54538	0.0109158	0.129639	ENSG00000099992	TBC1D10A
345.351	-0.141539	0.0556078	-2.54531	0.0109181	0.129639	ENSG00000010219	DYRK4
295.414	-0.335657	0.131906	-2.54468	0.0109379	0.129773	ENSG00000180626	ZNF594
4808.88	0.104149	0.0409384	2.54403	0.0109581	0.129895	ENSG00000116580	GON4L
4514.53	-0.101387	0.0398564	-2.54381	0.0109652	0.129895	ENSG00000146731	CCT6A
251.506	0.270626	0.106412	2.54318	0.0109847	0.130026	ENSG00000167291	TBC1D16
1314.66	-0.229728	0.0903502	-2.54264	0.011002	0.130129	ENSG00000198919	DZIP3
59.2714	-0.386588	0.152101	-2.54166	0.0110326	0.13039	ENSG00000173567	ADGRF3
1218.73	0.183105	0.0720691	2.54069	0.0110635	0.130566	ENSG00000166189	HPS6
337.295	0.412674	0.162433	2.54059	0.0110666	0.130566	ENSG00000101084	RAB5IF
3132.98	-0.214651	0.0845024	-2.54018	0.0110796	0.130566	ENSG00000258289	CHURC1
32.6855	-0.421475	0.165928	-2.54011	0.0110818	0.130566	ENSG00000235280	MCF2L-AS1
99.3633	0.363146	0.142992	2.53963	0.0110968	0.130603	ENSG00000161249	DMKN
1519.26	0.162257	0.0638939	2.53947	0.0111021	0.130603	ENSG00000171823	FBXL14
7628.4	-0.159197	0.0627102	-2.53862	0.011129	0.13079	ENSG00000072501	SMC1A
744.661	0.152022	0.0598884	2.53843	0.0111351	0.13079	ENSG00000189114	BLOC1S3
703.851	0.175535	0.0691945	2.53683	0.011186	0.131169	ENSG00000107779	BMPR1A
1210.02	-0.142804	0.0562945	-2.53673	0.0111894	0.131169	ENSG00000154803	FLCN
25.52	-0.481409	0.189796	-2.53645	0.0111983	0.131169	ENSG00000236830	CBR3-AS1
95.9784	-0.973021	0.383632	-2.53634	0.0112018	0.131169	ENSG00000008438	PGLYRP1
470.769	-0.636786	0.251119	-2.53579	0.0112194	0.131191	ENSG00000159128	IFNGR2
2458.81	0.1357	0.053515	2.53574	0.0112209	0.131191	ENSG00000130038	CRACR2A
3239.01	-0.131827	0.0519962	-2.53532	0.0112346	0.131251	ENSG00000173744	AGFG1
1373.05	-0.152633	0.0602131	-2.53488	0.0112486	0.131314	ENSG00000178163	ZNF518B
645.088	-0.202395	0.0798552	-2.53453	0.0112599	0.131346	ENSG00000051596	THOC3
411.688	-0.422741	0.166831	-2.53395	0.0112784	0.131461	ENSG00000176595	KBTBD11
1318.87	-0.134218	0.0529852	-2.53313	0.0113048	0.131601	ENSG00000144840	RABL3
1349.54	0.160428	0.0633388	2.53286	0.0113136	0.131601	ENSG00000138074	SLC5A6
24.3305	0.535369	0.211376	2.53278	0.0113163	0.131601	ENSG00000261560	NA
2037.34	0.0701131	0.0276887	2.53219	0.0113353	0.131721	ENSG00000146872	TLK2
2769.68	0.106499	0.042065	2.53177	0.0113489	0.131779	ENSG00000078699	CBFA2T2
3654.34	0.141196	0.0557848	2.53108	0.0113712	0.131937	ENSG00000125844	RRBP1
225.185	-0.265052	0.104734	-2.53071	0.0113832	0.131975	ENSG00000071242	RPS6KA2
665.954	-0.145265	0.0574137	-2.53014	0.0114016	0.132089	ENSG00000183044	ABAT
1186.13	-0.345302	0.136531	-2.52911	0.0114352	0.132377	ENSG00000135916	ITM2C
7722.9	0.210734	0.0833578	2.52806	0.0114695	0.132673	ENSG00000068028	RASSF1
274.078	-0.554099	0.21923	-2.52747	0.0114887	0.132795	ENSG00000131686	CA6
44.8868	0.349727	0.138434	2.5263	0.011527	0.133137	ENSG00000242797	GLYCTK-AS1
523.251	-0.790456	0.31303	-2.52518	0.0115639	0.133462	ENSG00000170486	KRT72
255.623	0.13399	0.0530839	2.52412	0.0115987	0.133636	ENSG00000155592	ZKSCAN2
36.8505	0.589535	0.233566	2.52406	0.011601	0.133636	ENSG00000248360	LINC00504
459.473	0.19764	0.0783066	2.52392	0.0116053	0.133636	ENSG00000107554	DNMBP
1166.17	0.103642	0.0410758	2.5232	0.0116293	0.13371	ENSG00000108395	TRIM37
1418.47	-0.145857	0.0578081	-2.52313	0.0116315	0.13371	ENSG00000180884	ZNF792
6121.61	0.0906475	0.035933	2.52268	0.0116465	0.13371	ENSG00000109118	PHF12
1950.71	-0.303798	0.120427	-2.52267	0.0116468	0.13371	ENSG00000182287	AP1S2
1211.44	-0.231268	0.0917173	-2.52153	0.0116845	0.134042	ENSG00000179456	ZBTB18
2312.34	0.11528	0.045746	2.51999	0.0117358	0.134529	ENSG00000168884	TNIP2
94.5251	0.197728	0.0784893	2.51917	0.0117632	0.134742	ENSG00000283103	NA
1098.55	0.103375	0.0410567	2.51785	0.0118072	0.135145	ENSG00000103047	TANGO6
4482.57	0.17103	0.0679535	2.51686	0.0118405	0.135424	ENSG00000034677	RNF19A
31.4651	0.479965	0.190727	2.5165	0.0118528	0.135463	ENSG00000061656	SPAG4
275.408	-0.325659	0.129449	-2.51573	0.0118785	0.135655	ENSG00000211787	TRAV8-3
258.031	-0.441854	0.175674	-2.51519	0.0118968	0.13572	ENSG00000178732	GP5
47.6619	-0.416591	0.16564	-2.51504	0.011902	0.13572	ENSG00000279019	NA
421.798	0.122758	0.0488233	2.51433	0.0119259	0.135891	ENSG00000196152	ZNF79
369.619	-0.221165	0.0879979	-2.51329	0.011961	0.13619	ENSG00000175611	ERCC6L2-AS1
139.643	0.195486	0.0777927	2.51291	0.0119741	0.136236	ENSG00000121903	ZSCAN20
29.8938	-0.603297	0.240125	-2.51243	0.0119903	0.136319	ENSG00000122043	LINC00544
5505.09	0.139955	0.0557143	2.51201	0.0120044	0.136378	ENSG00000154217	PITPNC1
259.765	-0.50269	0.200145	-2.51163	0.0120175	0.136425	ENSG00000237649	KIFC1
1973.2	0.103299	0.0411372	2.51108	0.0120362	0.136529	ENSG00000085998	POMGNT1
91.332	-0.535545	0.213315	-2.51058	0.0120533	0.136529	ENSG00000071539	TRIP13
118.085	0.421129	0.167742	2.51057	0.0120535	0.136529	ENSG00000225556	C2CD4D
280.053	-0.245827	0.0979582	-2.50951	0.01209	0.136841	ENSG00000138756	BMP2K
42.4564	-0.296818	0.118302	-2.50899	0.0121076	0.136914	ENSG00000107018	RLN1
703.424	0.188721	0.0752283	2.50864	0.0121195	0.136914	ENSG00000151748	SAV1
645.351	-0.158518	0.0631918	-2.50853	0.0121235	0.136914	ENSG00000163322	ABRAXAS1
1688.65	0.197775	0.0789	2.50665	0.012188	0.137541	ENSG00000185164	NOMO2
33.1016	0.250923	0.100119	2.50624	0.0122024	0.137588	ENSG00000208772	SNORD94
19685.7	0.0958069	0.0382308	2.50601	0.0122102	0.137588	ENSG00000166598	HSP90B1
2133.31	-0.302189	0.120614	-2.50543	0.0122303	0.137713	ENSG00000117632	STMN1
123.06	-0.564954	0.225688	-2.50325	0.0123059	0.138462	ENSG00000227051	C14orf132
42.4983	0.69448	0.277466	2.50294	0.0123167	0.138481	ENSG00000238062	SPATA3-AS1
1190.74	-0.196966	0.0787187	-2.50215	0.0123442	0.138637	ENSG00000205765	RIMOC1
133.01	0.439198	0.175537	2.50202	0.0123487	0.138637	ENSG00000277701	NA
237.29	-0.510511	0.20411	-2.50116	0.0123787	0.138705	ENSG00000167513	CDT1
26.717	-0.528683	0.211384	-2.50106	0.0123822	0.138705	ENSG00000251675	NA
9754.67	-0.185235	0.0740767	-2.50058	0.0123991	0.138705	ENSG00000142875	PRKACB
57.7244	-1.24678	0.498626	-2.50044	0.0124041	0.138705	ENSG00000274735	NA
645.692	-0.313832	0.125518	-2.5003	0.0124089	0.138705	ENSG00000276043	UHRF1
542.082	-0.135032	0.0540067	-2.50028	0.0124095	0.138705	ENSG00000173409	ARV1
67.7609	-0.298884	0.119552	-2.50002	0.0124185	0.138705	ENSG00000150076	NA
88.3283	-0.409203	0.163755	-2.49887	0.012459	0.138944	ENSG00000196584	XRCC2
104.285	0.216159	0.0865098	2.49867	0.0124661	0.138944	ENSG00000279805	NA
274.882	0.305977	0.122458	2.49864	0.0124672	0.138944	ENSG00000135541	AHI1
45.5831	-0.336392	0.134689	-2.49754	0.0125057	0.139072	ENSG00000268230	NA
976.141	-0.105868	0.0423935	-2.49727	0.0125153	0.139072	ENSG00000120860	WASHC3
824.716	-0.113177	0.0453232	-2.49711	0.0125209	0.139072	ENSG00000144161	ZC3H8
746.21	0.201015	0.0805023	2.49701	0.0125246	0.139072	ENSG00000167074	TEF
4005.67	0.153237	0.0613683	2.49701	0.0125247	0.139072	ENSG00000163820	FYCO1
1009.1	-0.575839	0.230635	-2.49676	0.0125334	0.139072	ENSG00000171848	RRM2
884.213	-0.105332	0.042198	-2.49614	0.0125553	0.139213	ENSG00000055147	FAM114A2
349.319	0.225545	0.090389	2.49526	0.0125863	0.139402	ENSG00000106327	TFR2
3771.19	-0.136468	0.0546935	-2.49514	0.0125906	0.139402	ENSG00000197283	SYNGAP1
115.468	-0.225995	0.0906157	-2.494	0.0126314	0.139732	ENSG00000258768	NA
151.033	0.181198	0.072661	2.49374	0.0126404	0.139732	ENSG00000064652	SNX24
1790.12	0.175351	0.0703232	2.49351	0.0126489	0.139732	ENSG00000109756	RAPGEF2
1908.34	-0.0904961	0.0363024	-2.49284	0.0126726	0.139732	ENSG00000221914	PPP2R2A
50.9726	-0.219519	0.0880615	-2.4928	0.0126741	0.139732	ENSG00000278834	NA
27.4237	0.281036	0.112741	2.49276	0.0126754	0.139732	ENSG00000169627	BOLA2B
1098.77	0.118468	0.047539	2.49201	0.0127022	0.139926	ENSG00000017483	SLC38A5
115.64	0.577872	0.231915	2.49174	0.0127118	0.139931	ENSG00000125657	TNFSF9
533.249	-0.106343	0.0426868	-2.49123	0.0127302	0.139992	ENSG00000163818	LZTFL1
203.868	-0.627402	0.25186	-2.49108	0.0127357	0.139992	ENSG00000151914	DST
4026.29	0.114594	0.04602	2.49009	0.012771	0.140279	ENSG00000066654	THUMPD1
78.8657	-0.494947	0.19881	-2.48955	0.0127904	0.14039	ENSG00000275491	LINC01730
265.354	0.155014	0.062273	2.48926	0.0128009	0.140405	ENSG00000040487	SLC66A1
6249.84	0.139285	0.0559784	2.4882	0.0128393	0.140725	ENSG00000138378	STAT4
1612.41	0.104526	0.0420377	2.48649	0.0129011	0.141236	ENSG00000215421	ZNF407
118.518	0.416893	0.16767	2.48638	0.0129049	0.141236	ENSG00000215630	GUSBP9
451.242	0.246029	0.0989844	2.48553	0.0129359	0.141236	ENSG00000117016	RIMS3
7444.36	0.135471	0.0545042	2.48552	0.0129362	0.141236	ENSG00000162231	NXF1
2810.48	0.0646115	0.0259955	2.48549	0.0129373	0.141236	ENSG00000126581	BECN1
41.0706	0.29116	0.117149	2.48537	0.0129416	0.141236	ENSG00000138615	CILP
2948.06	0.09248	0.0372394	2.48339	0.0130138	0.141842	ENSG00000162298	SYVN1
521.961	0.100811	0.0405964	2.48325	0.0130188	0.141842	ENSG00000242687	NA
4187.35	-0.155062	0.0624504	-2.48296	0.0130296	0.141842	ENSG00000084733	RAB10
712.275	-0.42573	0.17147	-2.48283	0.0130343	0.141842	ENSG00000211747	TRBV20-1
1681.5	-0.159518	0.0642764	-2.48176	0.0130736	0.142168	ENSG00000162892	IL24
6023.87	0.241586	0.0973596	2.48138	0.0130875	0.142218	ENSG00000135362	PRR5L
56.9363	-0.269147	0.108486	-2.48093	0.0131039	0.142258	ENSG00000158373	H2BC5
2415.44	0.119622	0.0482242	2.48053	0.0131187	0.142258	ENSG00000143319	ISG20L2
208.942	0.459566	0.185279	2.4804	0.0131236	0.142258	ENSG00000129595	EPB41L4A
64.0345	-0.27833	0.112218	-2.48026	0.0131285	0.142258	ENSG00000272155	NA
2617.33	0.194878	0.078611	2.47902	0.0131745	0.142608	ENSG00000124256	ZBP1
216.297	-0.215714	0.087026	-2.47873	0.0131851	0.142608	ENSG00000128944	KNSTRN
255.444	0.167112	0.0674212	2.47863	0.0131889	0.142608	ENSG00000167394	ZNF668
68.2432	0.385839	0.155738	2.47749	0.0132311	0.142964	ENSG00000228278	ORM2
57.9991	-0.366397	0.148	-2.47565	0.0132994	0.1436	ENSG00000113231	PDE8B
2029.11	-0.127919	0.0516832	-2.47506	0.0133214	0.143649	ENSG00000124207	CSE1L
335.591	0.166758	0.0673907	2.47449	0.0133425	0.143649	ENSG00000141696	P3H4
379.692	-0.183505	0.0741651	-2.47428	0.0133504	0.143649	ENSG00000273033	LINC02035
1097.14	0.517734	0.209249	2.47424	0.013352	0.143649	ENSG00000138166	DUSP5
1276.41	0.194158	0.078477	2.47407	0.0133582	0.143649	ENSG00000133773	CCDC59
28.7395	0.352453	0.142468	2.47391	0.0133643	0.143649	ENSG00000270966	NA
25.1711	-0.617886	0.249776	-2.47376	0.0133699	0.143649	ENSG00000177103	DSCAML1
2817.81	0.0461528	0.018659	2.47348	0.0133803	0.143659	ENSG00000149658	YTHDF1
54.0369	-0.328669	0.132928	-2.47252	0.0134162	0.143868	ENSG00000196787	H2AC11
729.747	-0.241133	0.0975275	-2.47246	0.0134186	0.143868	ENSG00000072401	UBE2D1
3974.9	0.171447	0.0693614	2.47179	0.0134439	0.143939	ENSG00000174738	NR1D2
167.474	-0.517084	0.209204	-2.47167	0.0134485	0.143939	ENSG00000196782	MAML3
41.0935	0.228676	0.0925241	2.47153	0.0134536	0.143939	ENSG00000237437	ASS1P12
15552	0.116973	0.0473336	2.47125	0.013464	0.143949	ENSG00000166501	PRKCB
4362.69	0.103616	0.0419356	2.47084	0.0134798	0.144017	ENSG00000214655	ZSWIM8
4003.68	0.200902	0.0813342	2.47008	0.0135083	0.144221	ENSG00000129667	RHBDF2
97.8899	0.377432	0.152895	2.46857	0.0135654	0.144591	ENSG00000275140	SEC22B3P
23.7922	-0.336042	0.136133	-2.46849	0.0135685	0.144591	ENSG00000238287	NA
330.027	-0.164904	0.0668119	-2.46818	0.0135802	0.144591	ENSG00000092036	HAUS4
78.2328	0.247588	0.100313	2.46816	0.0135809	0.144591	ENSG00000274070	CASTOR2
7513.82	0.327214	0.132593	2.4678	0.0135947	0.144637	ENSG00000169554	ZEB2
1942.83	-0.143645	0.0582138	-2.46753	0.0136047	0.144643	ENSG00000152465	NMT2
361.05	0.346277	0.14039	2.46654	0.0136425	0.144771	ENSG00000256128	LINC00944
954.449	-0.116278	0.0471422	-2.46654	0.0136427	0.144771	ENSG00000138796	HADH
675.866	-0.161759	0.0655834	-2.46647	0.0136453	0.144771	ENSG00000187601	MAGEH1
55.6452	-0.567962	0.230326	-2.46591	0.0136667	0.144898	ENSG00000117650	NEK2
3996.24	-0.22546	0.091475	-2.46472	0.0137122	0.145279	ENSG00000137309	HMGA1
100.797	-0.445975	0.180981	-2.46421	0.0137314	0.145381	ENSG00000166126	AMN
4971.69	-0.133317	0.0541283	-2.46298	0.0137789	0.145783	ENSG00000167005	NUDT21
44.5647	-0.356371	0.144708	-2.46268	0.0137902	0.145801	ENSG00000272144	NA
1580.37	0.345983	0.140559	2.46148	0.0138367	0.146166	ENSG00000175274	TP53I11
15668.8	0.208626	0.0847682	2.46113	0.01385	0.146166	ENSG00000107331	ABCA2
10346.4	0.47633	0.193548	2.46104	0.0138534	0.146166	ENSG00000158050	DUSP2
16871	0.153498	0.0623922	2.46021	0.0138856	0.146404	ENSG00000197971	MBP
31.9209	-0.313679	0.127524	-2.45976	0.0139031	0.146487	ENSG00000242474	NA
130.333	-0.145692	0.059242	-2.45927	0.0139218	0.14658	ENSG00000271147	ARMCX5-GPRASP2
170.901	-0.355851	0.144712	-2.45903	0.0139311	0.14658	ENSG00000184867	ARMCX2
66.1266	-0.903211	0.367389	-2.45846	0.0139533	0.146641	ENSG00000143776	CDC42BPA
66.9186	-0.563103	0.229054	-2.45839	0.0139562	0.146641	ENSG00000151490	PTPRO
1299.07	-0.136734	0.0556281	-2.45799	0.0139715	0.146701	ENSG00000113583	C5orf15
718.375	-0.103903	0.04228	-2.45749	0.0139913	0.146808	ENSG00000179152	TCAIM
2519.55	0.42895	0.174573	2.45713	0.0140051	0.146852	ENSG00000115607	IL18RAP
146.113	-0.33247	0.135371	-2.45598	0.0140499	0.147196	ENSG00000143228	NUF2
4487.06	-0.145954	0.0594324	-2.4558	0.0140573	0.147196	ENSG00000111605	CPSF6
52.5424	0.778795	0.317324	2.45426	0.0141175	0.14751	ENSG00000156564	LRFN2
2653.39	0.108596	0.044255	2.45388	0.0141326	0.14751	ENSG00000153066	TXNDC11
103.759	-1.31008	0.533925	-2.45367	0.0141408	0.14751	ENSG00000138772	ANXA3
282.185	-0.230664	0.0940092	-2.45364	0.014142	0.14751	ENSG00000254685	FPGT
3629.39	-0.186052	0.0758315	-2.45349	0.0141476	0.14751	ENSG00000179715	PCED1B
254.638	-0.182163	0.0742514	-2.45333	0.0141541	0.14751	ENSG00000168275	COA6
249.353	0.764529	0.311681	2.45292	0.01417	0.14751	ENSG00000211893	IGHG2
289.153	-0.273228	0.111393	-2.45283	0.0141736	0.14751	ENSG00000135211	TMEM60
110.231	0.273118	0.111349	2.45281	0.0141744	0.14751	ENSG00000152767	FARP1
4801.85	0.277405	0.113124	2.45223	0.0141974	0.147649	ENSG00000090006	LTBP4
81.3064	-0.601084	0.245183	-2.45157	0.0142233	0.147817	ENSG00000011426	ANLN
3127.9	0.255492	0.10427	2.45029	0.0142743	0.148088	ENSG00000160908	ZNF394
47.8618	-0.269649	0.11007	-2.44978	0.0142943	0.148088	ENSG00000260329	TMEM263-DT
2595.49	0.128533	0.0524691	2.44968	0.0142982	0.148088	ENSG00000178764	ZHX2
1697.51	0.101069	0.0412607	2.44952	0.0143047	0.148088	ENSG00000137802	MAPKBP1
1320.06	0.181329	0.0740338	2.44927	0.0143144	0.148088	ENSG00000143891	GALM
1298.24	0.132743	0.0542041	2.44895	0.0143275	0.148088	ENSG00000088970	KIZ
117.164	-0.335999	0.13721	-2.44879	0.0143338	0.148088	ENSG00000105173	CCNE1
114.886	0.424968	0.173545	2.44874	0.0143355	0.148088	ENSG00000167549	CORO6
600.932	-0.165415	0.0675554	-2.44858	0.0143423	0.148088	ENSG00000145354	CISD2
2029.07	0.118992	0.0485983	2.44847	0.0143464	0.148088	ENSG00000122965	RBM19
3199.19	0.0680268	0.0277899	2.4479	0.0143692	0.148223	ENSG00000067596	DHX8
989.084	0.182907	0.0747487	2.44696	0.0144067	0.148509	ENSG00000167972	ABCA3
7739.45	-0.212975	0.0870549	-2.44645	0.0144271	0.148619	ENSG00000196230	TUBB
46978.5	0.176552	0.0721755	2.44615	0.014439	0.14864	ENSG00000153563	CD8A
468.639	-0.128961	0.0527423	-2.44511	0.014481	0.148972	ENSG00000185238	PRMT3
2715.25	0.147856	0.0604837	2.44456	0.0145031	0.149099	ENSG00000054983	GALC
750.182	-0.145878	0.0596974	-2.44362	0.0145406	0.14938	ENSG00000153767	GTF2E1
2203.73	0.189021	0.0773669	2.44318	0.0145585	0.14938	ENSG00000145730	PAM
1556.53	-0.133105	0.0544811	-2.44315	0.0145598	0.14938	ENSG00000112237	CCNC
1720.14	-0.205014	0.0839286	-2.44272	0.0145769	0.149455	ENSG00000126860	EVI2A
286.56	-0.273807	0.112123	-2.44203	0.0146051	0.14958	ENSG00000128039	SRD5A3
359.144	-0.31161	0.127608	-2.44194	0.0146087	0.14958	ENSG00000249859	PVT1
7911.56	0.0934363	0.0382672	2.44168	0.0146191	0.149586	ENSG00000264364	DYNLL2
31.8387	0.489624	0.200584	2.441	0.0146467	0.149768	ENSG00000139926	FRMD6
5856.28	0.165647	0.0678705	2.44063	0.0146615	0.149784	ENSG00000164483	SAMD3
935.194	-0.152803	0.0626158	-2.44033	0.0146738	0.149784	ENSG00000180964	TCEAL8
1147.63	-0.379975	0.155733	-2.43991	0.014691	0.149784	ENSG00000184602	SNN
39.0196	-0.389444	0.15963	-2.43967	0.0147009	0.149784	ENSG00000198722	UNC13B
39.5213	-0.411573	0.168715	-2.43946	0.0147093	0.149784	ENSG00000120693	SMAD9
1910.05	0.0933388	0.0382641	2.43933	0.0147144	0.149784	ENSG00000148331	ASB6
647.016	-0.169782	0.0696036	-2.43927	0.0147171	0.149784	ENSG00000161048	NAPEPLD
722.517	-0.6823	0.279763	-2.43885	0.0147341	0.149855	ENSG00000204577	LILRB3
24.7145	-0.416367	0.170739	-2.43861	0.0147437	0.149855	ENSG00000233435	AGGF1P2
994.672	0.125265	0.0513742	2.43829	0.014757	0.14989	ENSG00000249673	NOP14-AS1
714.022	-0.173144	0.0710273	-2.43771	0.0147805	0.150029	ENSG00000184428	TOP1MT
107.149	-0.184395	0.0756597	-2.43716	0.0148033	0.150159	ENSG00000257511	NA
193.612	-0.36272	0.148844	-2.43692	0.014813	0.150159	ENSG00000134690	CDCA8
288.83	-0.350443	0.143918	-2.43502	0.0148911	0.150764	ENSG00000149554	CHEK1
95.0971	0.493793	0.202791	2.43498	0.0148925	0.150764	ENSG00000189409	MMP23B
1650.58	0.447018	0.183602	2.43472	0.0149034	0.150775	ENSG00000107317	PTGDS
62.3837	-0.467456	0.192033	-2.43425	0.0149227	0.150869	ENSG00000114405	C3orf14
106.338	0.328239	0.134915	2.43293	0.0149773	0.151321	ENSG00000005243	COPZ2
2099.27	0.189811	0.078085	2.43083	0.0150643	0.151975	ENSG00000165355	FBXO33
1691.79	0.153643	0.0632072	2.43078	0.0150664	0.151975	ENSG00000121964	GTDC1
264.215	-0.600194	0.246936	-2.43056	0.0150756	0.151975	ENSG00000069188	SDK2
134.457	-0.271489	0.111711	-2.43027	0.0150874	0.151975	ENSG00000246263	UBR5-DT
11638.6	0.135485	0.0557514	2.43017	0.0150918	0.151975	ENSG00000103335	PIEZO1
46.6103	0.271902	0.111938	2.42903	0.0151394	0.152181	ENSG00000278219	NA
158.203	0.245695	0.10115	2.42902	0.0151398	0.152181	ENSG00000186564	FOXD2
193.537	-0.815996	0.335945	-2.42896	0.0151423	0.152181	ENSG00000181409	AATK
884.07	0.213842	0.0880477	2.42871	0.0151528	0.152182	ENSG00000178381	ZFAND2A
86.0224	-0.703732	0.289783	-2.42848	0.0151623	0.152182	ENSG00000229769	TRBV10-2
432.481	0.43461	0.179063	2.42713	0.0152187	0.152648	ENSG00000169884	WNT10B
3362.36	0.0922803	0.0380303	2.42649	0.0152457	0.152817	ENSG00000164609	SLU7
7720.34	-0.12978	0.0534927	-2.42613	0.0152608	0.15283	ENSG00000124486	USP9X
440.128	0.38377	0.158192	2.42598	0.0152671	0.15283	ENSG00000237550	NA
5873.72	0.113078	0.0466198	2.42553	0.0152859	0.15283	ENSG00000104419	NDRG1
645.22	0.355415	0.146539	2.4254	0.0152917	0.15283	ENSG00000160789	LMNA
406.915	0.186068	0.0767279	2.42503	0.0153069	0.15283	ENSG00000175048	ZDHHC14
1721.69	-0.123787	0.0510571	-2.42447	0.0153306	0.15283	ENSG00000143155	TIPRL
1491.06	0.175826	0.072522	2.42445	0.0153317	0.15283	ENSG00000078589	P2RY10
210.796	0.19249	0.0793992	2.42433	0.0153366	0.15283	ENSG00000258733	LINC02328
1008.09	-0.172623	0.0712097	-2.42415	0.0153441	0.15283	ENSG00000133731	IMPA1
2004.53	0.129713	0.0535102	2.42408	0.0153471	0.15283	ENSG00000135070	ISCA1
331.196	0.265497	0.109539	2.42377	0.0153604	0.152862	ENSG00000221968	FADS3
75.3536	-0.549273	0.226651	-2.42343	0.0153747	0.152905	ENSG00000273445	NA
37.2814	-0.2247	0.0927438	-2.4228	0.0154013	0.153069	ENSG00000255062	NA
2546.91	0.147298	0.0608157	2.42204	0.0154335	0.15323	ENSG00000135749	PCNX2
137.928	-0.221914	0.091626	-2.42195	0.0154375	0.15323	ENSG00000138193	PLCE1
61.6734	-0.484084	0.199909	-2.42153	0.0154554	0.153233	ENSG00000105641	SLC5A5
1642.89	-0.0950047	0.0392378	-2.42126	0.0154669	0.153233	ENSG00000092108	SCFD1
1892.48	0.0703446	0.0290561	2.42099	0.0154783	0.153233	ENSG00000129071	MBD4
3532.24	0.14777	0.0610396	2.42089	0.0154828	0.153233	ENSG00000185043	CIB1
7326.95	0.155751	0.0643397	2.42076	0.0154881	0.153233	ENSG00000160218	TRAPPC10
49.2405	-0.661513	0.273308	-2.4204	0.0155036	0.153286	ENSG00000274979	NA
282.165	-0.118341	0.0489014	-2.42	0.0155205	0.153354	ENSG00000124370	MCEE
299.491	-0.181942	0.075199	-2.41948	0.0155429	0.153425	ENSG00000153044	CENPH
80.6286	0.266809	0.110281	2.41936	0.0155478	0.153425	ENSG00000237693	IRGM
145.898	-0.433429	0.179207	-2.41859	0.0155809	0.153653	ENSG00000051180	RAD51
199.985	0.42055	0.173909	2.41822	0.0155966	0.153707	ENSG00000135144	DTX1
344.156	-0.470107	0.194509	-2.41689	0.0156537	0.154171	ENSG00000167900	TK1
4167.53	0.0798092	0.0330276	2.41644	0.0156731	0.154262	ENSG00000114982	KANSL3
243.486	-0.173963	0.0720027	-2.41607	0.0156891	0.154262	ENSG00000105750	ZNF85
3247.21	-0.145442	0.0602	-2.41597	0.0156933	0.154262	ENSG00000133703	KRAS
160.537	0.238165	0.0985961	2.41556	0.0157109	0.154335	ENSG00000270344	POC1B-AS1
323.86	-0.376881	0.15606	-2.41498	0.015736	0.154412	ENSG00000138670	RASGEF1B
226.619	-0.151331	0.0626702	-2.41472	0.0157474	0.154412	ENSG00000100209	HSCB
482.492	-0.314632	0.1303	-2.41468	0.0157491	0.154412	ENSG00000197121	PGAP1
259.845	0.213392	0.0883867	2.4143	0.0157656	0.154414	ENSG00000177380	PPFIA3
29.7828	0.320621	0.132806	2.4142	0.0157696	0.154414	ENSG00000259088	NA
46.0931	-0.312381	0.129424	-2.41363	0.0157945	0.154515	ENSG00000231105	ECE1-AS1
10812	0.138075	0.0572096	2.4135	0.0158002	0.154515	ENSG00000101096	NFATC2
35890	0.110555	0.0458215	2.41272	0.0158338	0.154701	ENSG00000275023	MLLT6
2403.4	0.168075	0.0696657	2.41259	0.0158395	0.154701	ENSG00000111676	ATN1
195.073	-0.338393	0.140302	-2.41189	0.0158702	0.154902	ENSG00000123975	CKS2
1987.38	0.0724737	0.0300524	2.41158	0.0158835	0.154933	ENSG00000068438	FTSJ1
264.195	0.44188	0.183311	2.41055	0.0159284	0.155182	ENSG00000154917	RAB6B
18856.5	0.159071	0.0659943	2.41037	0.0159364	0.155182	ENSG00000189067	LITAF
294.127	0.502267	0.208384	2.41029	0.0159396	0.155182	ENSG00000185338	SOCS1
2197.54	-0.523483	0.217282	-2.40923	0.0159861	0.155465	ENSG00000148773	MKI67
89.7848	0.202736	0.084152	2.40916	0.0159891	0.155465	ENSG00000130821	SLC6A8
97.0908	-0.19561	0.081224	-2.40828	0.0160278	0.155712	ENSG00000276900	NA
33.2655	-0.42065	0.174687	-2.40802	0.0160391	0.155712	ENSG00000247516	MIR4458HG
487.06	-0.204081	0.0847553	-2.40789	0.0160451	0.155712	ENSG00000221923	ZNF880
104.132	0.607225	0.252207	2.40764	0.0160558	0.155717	ENSG00000080007	DDX43
41.2186	0.209134	0.0868759	2.40728	0.0160719	0.155774	ENSG00000265806	MIR4292
1143.8	-0.332438	0.13813	-2.4067	0.0160974	0.155777	ENSG00000089127	OAS1
301.846	-0.256095	0.106421	-2.40644	0.016109	0.155777	ENSG00000226979	LTA
1002.87	0.104928	0.043608	2.40616	0.0161212	0.155777	ENSG00000170100	ZNF778
6894.71	0.23197	0.0964073	2.40615	0.0161218	0.155777	ENSG00000126822	PLEKHG3
1148.06	-0.173096	0.0719541	-2.40565	0.0161438	0.155777	ENSG00000243646	IL10RB
178.27	-0.153674	0.0638816	-2.40561	0.0161456	0.155777	ENSG00000271976	NA
773.735	-0.12403	0.051562	-2.40545	0.0161526	0.155777	ENSG00000106355	LSM5
19366.9	0.0877163	0.0364661	2.40542	0.0161539	0.155777	ENSG00000110934	BIN2
2467.15	0.137345	0.0571087	2.40498	0.0161735	0.155866	ENSG00000196998	WDR45
7742.06	0.139685	0.0581085	2.40387	0.0162224	0.15624	ENSG00000141298	SSH2
169.353	0.360914	0.150156	2.40359	0.0162349	0.156261	ENSG00000243753	HLA-L
263.775	-1.22483	0.509761	-2.40275	0.0162722	0.156521	ENSG00000148346	LCN2
515.916	-0.305447	0.127159	-2.40209	0.0163015	0.156704	ENSG00000082014	SMARCD3
1311.11	0.111948	0.0466176	2.40142	0.0163317	0.156896	ENSG00000196655	TRAPPC4
68.6367	-0.347831	0.144885	-2.40073	0.0163624	0.156906	ENSG00000124466	LYPD3
328.506	-0.165427	0.0689074	-2.40071	0.0163635	0.156906	ENSG00000198039	ZNF273
1360.84	0.100806	0.0419902	2.4007	0.0163637	0.156906	ENSG00000198382	UVRAG
38.9946	-0.713404	0.297228	-2.40019	0.0163866	0.156924	ENSG00000092067	CEBPE
77.3221	-0.595373	0.248055	-2.40017	0.0163875	0.156924	ENSG00000160321	ZNF208
2565.06	0.150036	0.0625159	2.39997	0.0163964	0.156924	ENSG00000197892	KIF13B
2959.82	0.165118	0.0688146	2.39947	0.016419	0.157042	ENSG00000189241	TSPYL1
34.382	0.340677	0.142033	2.39857	0.0164592	0.157327	ENSG00000131019	ULBP3
2159.15	-0.136627	0.0569812	-2.39776	0.0164955	0.157558	ENSG00000116161	CACYBP
214.319	-0.128864	0.0537485	-2.39755	0.0165054	0.157558	ENSG00000166262	FAM227B
234.354	0.325824	0.135927	2.39705	0.0165279	0.157558	ENSG00000258424	NA
3509.8	0.115215	0.0480656	2.39704	0.0165279	0.157558	ENSG00000135966	TGFBRAP1
986.804	0.204093	0.0851494	2.39689	0.016535	0.157558	ENSG00000142794	NBPF3
1732.21	-0.0823809	0.0343742	-2.39659	0.0165484	0.157568	ENSG00000119041	GTF3C3
792.221	-0.593567	0.247718	-2.39614	0.016569	0.157568	ENSG00000138449	SLC40A1
599.431	0.162364	0.0677725	2.39572	0.0165875	0.157568	ENSG00000183665	TRMT12
68.2825	-0.257165	0.107344	-2.39571	0.0165882	0.157568	ENSG00000166016	ABTB2
1373.92	0.166649	0.0695626	2.39567	0.0165901	0.157568	ENSG00000125814	NAPB
45.3012	-0.470281	0.196319	-2.39549	0.016598	0.157568	ENSG00000177602	HASPIN
17262.4	0.133314	0.0556775	2.39439	0.016648	0.157869	ENSG00000027075	PRKCH
34.0429	-0.309817	0.129396	-2.39434	0.0166505	0.157869	ENSG00000234353	NA
1878.06	-0.21079	0.0880517	-2.39393	0.0166688	0.157944	ENSG00000173208	ABCD2
314.991	-0.24084	0.100629	-2.39335	0.0166954	0.158098	ENSG00000163535	SGO2
180.179	0.484131	0.20236	2.39243	0.0167374	0.158398	ENSG00000115155	OTOF
1832.06	-0.134846	0.0563816	-2.39167	0.0167719	0.158561	ENSG00000068305	MEF2A
1099.58	-0.11684	0.0488576	-2.39143	0.0167829	0.158561	ENSG00000186448	ZNF197
65.1955	0.284838	0.119122	2.39116	0.0167954	0.158561	ENSG00000275888	NA
5496.56	0.0619615	0.0259144	2.39101	0.0168022	0.158561	ENSG00000100403	ZC3H7B
143.589	0.167034	0.0698622	2.39091	0.0168067	0.158561	ENSG00000139173	TMEM117
2139.76	-0.132658	0.0554964	-2.39039	0.0168303	0.158648	ENSG00000224078	SNHG14
43436.2	0.122934	0.0514315	2.39026	0.0168367	0.158648	ENSG00000107742	SPOCK2
1221.36	-0.163295	0.0683337	-2.38967	0.0168635	0.158687	ENSG00000160131	VMA21
67.7717	-0.457243	0.191355	-2.3895	0.0168712	0.158687	ENSG00000171766	GATM
72.7783	-0.514519	0.21542	-2.38845	0.0169196	0.158687	ENSG00000171320	ESCO2
128.067	0.664013	0.27801	2.38845	0.0169197	0.158687	ENSG00000065833	ME1
3631.95	0.183229	0.0767156	2.38842	0.0169208	0.158687	ENSG00000140474	ULK3
453.318	-0.130383	0.0545975	-2.38808	0.0169368	0.158687	ENSG00000151882	CCL28
1064.64	-0.353876	0.148204	-2.38775	0.0169516	0.158687	ENSG00000137965	IFI44
103.249	-0.531309	0.222519	-2.3877	0.0169543	0.158687	ENSG00000154589	LY96
1405.29	-0.132951	0.0556886	-2.3874	0.0169678	0.158687	ENSG00000206053	JPT2
3462.77	-0.116945	0.0489918	-2.38703	0.0169851	0.158687	ENSG00000069329	VPS35
1494.12	0.102817	0.0430762	2.38686	0.016993	0.158687	ENSG00000008405	CRY1
15681.9	0.199571	0.0836173	2.38671	0.0169997	0.158687	ENSG00000213445	SIPA1
293.411	0.199205	0.0834643	2.38671	0.0170001	0.158687	ENSG00000160447	PKN3
2109.14	0.199229	0.0834806	2.38653	0.0170084	0.158687	ENSG00000167508	MVD
2706.95	-0.504642	0.211462	-2.38644	0.0170122	0.158687	ENSG00000105835	NAMPT
51.9256	-0.213655	0.0895296	-2.38642	0.0170133	0.158687	ENSG00000196741	LINC01560
3818.42	0.189244	0.0793037	2.38632	0.0170178	0.158687	ENSG00000154760	SLFN13
530.855	0.205141	0.0859797	2.38593	0.0170361	0.158761	ENSG00000248275	TRIM52-AS1
13221.1	-0.155775	0.0653014	-2.38548	0.0170568	0.158856	ENSG00000064666	CNN2
675.954	-0.158745	0.0665641	-2.38484	0.0170866	0.159028	ENSG00000168303	MPLKIP
298.272	-0.260212	0.109121	-2.38461	0.0170974	0.159028	ENSG00000114346	ECT2
3286.81	0.0989651	0.0415099	2.38413	0.0171195	0.159028	ENSG00000161526	SAP30BP
29.317	0.430668	0.180639	2.38413	0.0171195	0.159028	ENSG00000103852	TTC23
3096.47	-0.189972	0.07969	-2.38389	0.0171308	0.159028	ENSG00000005889	ZFX
209.055	-0.296896	0.124551	-2.38374	0.0171378	0.159028	ENSG00000176533	GNG7
16878.3	0.192773	0.0809034	2.38275	0.0171837	0.159332	ENSG00000026950	BTN3A1
10815.8	0.174083	0.0730664	2.38254	0.0171938	0.159332	ENSG00000151651	ADAM8
360.81	0.291233	0.122263	2.38203	0.0172176	0.159332	ENSG00000157107	FCHO2
1172.35	0.0801408	0.033645	2.38195	0.017221	0.159332	ENSG00000166024	R3HCC1L
275.306	0.463653	0.194665	2.3818	0.0172281	0.159332	ENSG00000165548	TMEM63C
418.71	-0.114033	0.0478841	-2.38144	0.0172449	0.159332	ENSG00000086200	IPO11
995.587	-0.205292	0.0862049	-2.38144	0.0172449	0.159332	ENSG00000197355	UAP1L1
5112.03	0.0767518	0.0322318	2.38125	0.0172541	0.159332	ENSG00000136813	ECPAS
489.734	-0.150288	0.063123	-2.38087	0.0172719	0.1594	ENSG00000197498	RPF2
17378	0.161042	0.0676521	2.38045	0.0172917	0.159416	ENSG00000044574	HSPA5
380.409	-0.16965	0.0712714	-2.38034	0.0172968	0.159416	ENSG00000205808	PLPP6
20133.6	-0.231063	0.0970788	-2.38016	0.0173051	0.159416	ENSG00000081059	TCF7
1803.81	0.133751	0.0562166	2.3792	0.0173503	0.159655	ENSG00000182208	MOB2
417.173	-0.147	0.0617867	-2.37915	0.0173526	0.159655	ENSG00000164414	SLC35A1
551.971	-0.147688	0.0620812	-2.37894	0.0173624	0.159655	ENSG00000196284	SUPT3H
2264.51	0.0781983	0.0328761	2.37858	0.0173796	0.159716	ENSG00000179361	ARID3B
94.9446	-0.229346	0.0964638	-2.37753	0.0174289	0.159996	ENSG00000174529	TMEM81
135.092	-1.03482	0.435274	-2.37739	0.0174356	0.159996	ENSG00000123689	G0S2
85.7515	0.602481	0.253434	2.37727	0.0174415	0.159996	ENSG00000196542	SPTSSB
8129.05	0.164084	0.0690439	2.37651	0.0174772	0.160226	ENSG00000196323	ZBTB44
1555.34	-0.152376	0.0641302	-2.37603	0.0174998	0.160272	ENSG00000111906	HDDC2
578.704	-0.0924897	0.0389272	-2.37597	0.0175031	0.160272	ENSG00000111445	RFC5
981.146	0.31308	0.131803	2.37536	0.0175318	0.160438	ENSG00000150457	LATS2
1988.39	0.105089	0.044247	2.37505	0.0175465	0.160476	ENSG00000130699	TAF4
596.834	0.450405	0.189686	2.37448	0.0175735	0.160627	ENSG00000100321	SYNGR1
1334.99	-0.0833579	0.0351119	-2.37406	0.0175936	0.160715	ENSG00000164934	DCAF13
607.833	-0.212304	0.0894609	-2.37315	0.0176372	0.160932	ENSG00000172469	MANEA
1153.52	-0.203225	0.0856364	-2.37312	0.0176386	0.160932	ENSG00000158987	RAPGEF6
16703.3	0.144885	0.0610757	2.37222	0.0176815	0.161228	ENSG00000130402	ACTN4
49.5542	-0.324545	0.136854	-2.37146	0.0177178	0.161462	ENSG00000253930	TNFRSF10A-AS1
11712.3	0.144283	0.0608886	2.36963	0.0178061	0.16209	ENSG00000163219	ARHGAP25
200.706	-0.198668	0.0838409	-2.36959	0.0178081	0.16209	ENSG00000244026	FAM86DP
84.672	-0.278679	0.117627	-2.36918	0.0178277	0.162173	ENSG00000235823	OLMALINC
18175.7	-0.115865	0.0489386	-2.36755	0.0179063	0.162709	ENSG00000148700	ADD3
601.678	-0.410452	0.173368	-2.36751	0.0179081	0.162709	ENSG00000007968	E2F2
1355.31	0.152368	0.0643877	2.36642	0.0179613	0.163045	ENSG00000197579	TOPORS
1113.18	-0.273837	0.11573	-2.36617	0.017973	0.163045	ENSG00000187608	ISG15
766.094	-0.138316	0.0584578	-2.36609	0.0179771	0.163045	ENSG00000143771	CNIH4
2568.24	-0.222085	0.0938821	-2.36558	0.018002	0.163174	ENSG00000062716	VMP1
132.124	0.414758	0.175407	2.36455	0.0180521	0.163385	ENSG00000204177	BMS1P1
5075.82	0.149166	0.0630875	2.36443	0.018058	0.163385	ENSG00000134242	PTPN22
1164.58	-0.133274	0.0563679	-2.36436	0.0180614	0.163385	ENSG00000161813	LARP4
4694.17	0.154489	0.0653485	2.36407	0.0180752	0.163385	ENSG00000178951	ZBTB7A
63.0379	-0.309275	0.130827	-2.364	0.0180789	0.163385	ENSG00000247796	MOCS2-DT
6692.45	0.247061	0.104533	2.36347	0.0181045	0.163495	ENSG00000139182	CLSTN3
36.356	0.269207	0.113915	2.36323	0.0181165	0.163495	ENSG00000274403	NA
4707.36	0.0827532	0.03502	2.36303	0.0181263	0.163495	ENSG00000139645	ANKRD52
335.873	-0.226295	0.095771	-2.36287	0.018134	0.163495	ENSG00000152147	GEMIN6
370.281	0.170007	0.0720039	2.36108	0.0182216	0.164188	ENSG00000171763	SPATA5L1
589.641	0.240882	0.102034	2.3608	0.0182354	0.164215	ENSG00000240891	PLCXD2
106.042	0.867184	0.367455	2.35998	0.0182761	0.164227	ENSG00000130635	COL5A1
868.648	-0.183584	0.0777989	-2.35972	0.0182886	0.164227	ENSG00000112294	ALDH5A1
1447.91	-0.264218	0.111972	-2.35968	0.0182906	0.164227	ENSG00000196329	GIMAP5
402.841	-0.51774	0.219416	-2.35963	0.0182932	0.164227	ENSG00000240403	KIR3DL2
74.8578	-0.249923	0.10592	-2.35955	0.018297	0.164227	ENSG00000279267	NA
2634.98	0.110575	0.0468643	2.35947	0.0183013	0.164227	ENSG00000102804	TSC22D1
1351.91	0.143371	0.0608255	2.35709	0.0184188	0.16518	ENSG00000215251	FASTKD5
698.78	0.715416	0.303544	2.35688	0.0184292	0.16518	ENSG00000007350	TKTL1
44.4932	-0.840989	0.356956	-2.356	0.0184727	0.16547	ENSG00000259207	ITGB3
7427.87	0.0779042	0.0330719	2.3556	0.0184929	0.16547	ENSG00000198663	C6orf89
2144.24	-0.13296	0.0564493	-2.35538	0.0185038	0.16547	ENSG00000122085	MTERF4
779.233	-0.0963394	0.0409023	-2.35536	0.0185049	0.16547	ENSG00000116455	WDR77
1267.73	0.76581	0.32524	2.3546	0.0185427	0.165515	ENSG00000153234	NR4A2
173.192	-0.227102	0.0964639	-2.35427	0.0185592	0.165515	ENSG00000215447	NA
23019.6	0.119792	0.0508836	2.35423	0.018561	0.165515	ENSG00000136286	MYO1G
2924.02	0.088243	0.0374859	2.35403	0.018571	0.165515	ENSG00000136444	RSAD1
9283.26	-0.142297	0.0604528	-2.35386	0.0185796	0.165515	ENSG00000116489	CAPZA1
2991.21	0.244515	0.103883	2.35375	0.0185849	0.165515	ENSG00000162676	GFI1
797.176	-0.353439	0.150161	-2.35373	0.018586	0.165515	ENSG00000278030	TRBV7-9
1836.99	0.152752	0.0649391	2.35223	0.0186611	0.166087	ENSG00000089818	NECAP1
16292.4	0.147425	0.0626991	2.35132	0.0187071	0.1664	ENSG00000179218	CALR
606.535	0.421108	0.179167	2.35036	0.0187553	0.166667	ENSG00000141682	PMAIP1
665.486	0.0985153	0.0419163	2.35028	0.018759	0.166667	ENSG00000204104	TRAF3IP1
51898.1	-0.132162	0.0562631	-2.34901	0.0188236	0.167048	ENSG00000184009	ACTG1
6112.43	0.0823207	0.035045	2.349	0.0188239	0.167048	ENSG00000204843	DCTN1
131.069	-0.399075	0.169939	-2.34835	0.018857	0.16722	ENSG00000049768	FOXP3
402.695	-0.451106	0.192114	-2.34812	0.0188684	0.16722	ENSG00000154027	AK5
271.904	-0.383441	0.163308	-2.34797	0.0188762	0.16722	ENSG00000271533	NA
2305.89	0.352621	0.1502	2.34767	0.0188913	0.167257	ENSG00000189190	ZNF600
6074.92	0.129963	0.0553645	2.34741	0.0189046	0.167278	ENSG00000189339	SLC35E2B
2760.75	0.204977	0.0873404	2.34688	0.0189315	0.167418	ENSG00000167543	TP53I13
11309	-0.218353	0.0930566	-2.34645	0.0189532	0.167514	ENSG00000065357	DGKA
700.8	0.180816	0.0770839	2.34571	0.0189911	0.167721	ENSG00000110171	TRIM3
1963.86	-0.063104	0.026906	-2.34535	0.0190094	0.167721	ENSG00000144029	MRPS5
7340.04	-0.0881653	0.0375917	-2.34534	0.0190097	0.167721	ENSG00000115677	HDLBP
319.316	0.206212	0.0879521	2.3446	0.0190476	0.167958	ENSG00000137185	ZSCAN9
85.5499	-0.183999	0.0784924	-2.34416	0.0190698	0.16797	ENSG00000153363	LINC00467
86.0405	-0.563844	0.240533	-2.34414	0.019071	0.16797	ENSG00000184661	CDCA2
95.5688	-0.312382	0.133309	-2.34328	0.0191149	0.168248	ENSG00000143344	RGL1
2665.89	0.115418	0.0492606	2.34302	0.0191285	0.168248	ENSG00000131899	LLGL1
923.926	-0.200245	0.0854698	-2.34288	0.0191356	0.168248	ENSG00000152443	ZNF776
68.1164	-0.267224	0.114095	-2.34212	0.0191748	0.168447	ENSG00000230383	NA
678.921	-0.152196	0.0649855	-2.34201	0.0191804	0.168447	ENSG00000109814	UGDH
96.7098	-0.280161	0.119672	-2.34108	0.0192281	0.168769	ENSG00000185480	PARPBP
212.362	-0.478488	0.204486	-2.33995	0.0192862	0.169131	ENSG00000146670	CDCA5
4370.5	-0.13315	0.0569083	-2.33973	0.0192978	0.169131	ENSG00000005302	MSL3
25.8824	-0.35818	0.153092	-2.33963	0.0193026	0.169131	ENSG00000223522	NA
2327.38	0.11027	0.0471389	2.33925	0.0193225	0.169207	ENSG00000041802	LSG1
1370.77	-0.147112	0.0628964	-2.33895	0.0193378	0.169244	ENSG00000074696	HACD3
4241.08	0.147563	0.0631385	2.33713	0.0194326	0.169976	ENSG00000075151	EIF4G3
211.138	0.294498	0.126063	2.33613	0.0194846	0.170334	ENSG00000273148	LINC00653
137.498	-0.150531	0.0644485	-2.33568	0.0195078	0.170397	ENSG00000167720	SRR
621.061	-0.136404	0.0584032	-2.33556	0.0195142	0.170397	ENSG00000214194	SMIM30
647.165	-0.138653	0.0593789	-2.33505	0.0195409	0.170533	ENSG00000109466	KLHL2
117.443	-0.55674	0.238574	-2.33361	0.0196162	0.171058	ENSG00000065328	MCM10
90.7744	-0.323797	0.138762	-2.33347	0.0196236	0.171058	ENSG00000261254	NA
2534.13	0.149902	0.0642497	2.33312	0.019642	0.171121	ENSG00000118689	FOXO3
9827.13	0.205379	0.0880612	2.33223	0.0196887	0.171419	ENSG00000189319	FAM53B
5022.97	-0.334841	0.143588	-2.33196	0.0197027	0.171419	ENSG00000160593	JAML
130.365	-0.442524	0.189776	-2.33182	0.01971	0.171419	ENSG00000010278	CD9
57.2909	0.63424	0.272151	2.33047	0.0197813	0.171614	ENSG00000132561	MATN2
192.058	-0.144699	0.0620909	-2.33043	0.0197833	0.171614	ENSG00000109016	DHRS7B
254.258	-0.472188	0.202621	-2.3304	0.0197851	0.171614	ENSG00000211791	TRAV13-2
260.44	-0.282573	0.121265	-2.33021	0.019795	0.171614	ENSG00000139618	BRCA2
211.668	-0.269747	0.115782	-2.32979	0.0198171	0.171614	ENSG00000090554	FLT3LG
4779.78	0.179353	0.076989	2.32959	0.0198277	0.171614	ENSG00000136213	CHST12
36.1667	-0.546064	0.234411	-2.32951	0.0198318	0.171614	ENSG00000144677	CTDSPL
11199.2	-0.106486	0.0457232	-2.32894	0.0198624	0.171614	ENSG00000130985	UBA1
801.686	0.356241	0.152971	2.32882	0.0198686	0.171614	ENSG00000282826	FRG1CP
48.693	0.31255	0.134214	2.32873	0.0198733	0.171614	ENSG00000226332	NA
128.869	-0.372539	0.160022	-2.32804	0.0199098	0.171614	ENSG00000163492	CCDC141
784.139	0.187312	0.0804599	2.32801	0.0199114	0.171614	ENSG00000067191	CACNB1
400.532	0.241378	0.103691	2.32787	0.0199189	0.171614	ENSG00000069869	NEDD4
344.51	-0.30092	0.129269	-2.32787	0.0199191	0.171614	ENSG00000121152	NCAPH
185.584	-0.472538	0.202993	-2.32785	0.0199199	0.171614	ENSG00000112655	PTK7
5748.44	0.129365	0.0555734	2.32782	0.0199219	0.171614	ENSG00000113580	NR3C1
2607.75	0.148433	0.0637722	2.32755	0.0199361	0.171614	ENSG00000215305	VPS16
316.86	0.248403	0.106736	2.32727	0.0199508	0.171614	ENSG00000061676	NCKAP1
441.899	-0.146015	0.0627415	-2.32724	0.0199524	0.171614	ENSG00000111845	PAK1IP1
482.187	-0.118541	0.0509383	-2.32715	0.0199575	0.171614	ENSG00000145545	SRD5A1
200.025	0.171084	0.0735256	2.32686	0.0199729	0.171633	ENSG00000089091	DZANK1
1518.05	-0.422365	0.181545	-2.3265	0.0199918	0.171633	ENSG00000151726	ACSL1
721.837	-0.193895	0.0833447	-2.32642	0.0199959	0.171633	ENSG00000146476	ARMT1
181.338	0.204998	0.0881341	2.32598	0.0200197	0.171633	ENSG00000163959	SLC51A
4462.76	0.122096	0.0524973	2.32575	0.020032	0.171633	ENSG00000259956	RBM15B
72.9778	0.610137	0.262341	2.32574	0.0200325	0.171633	ENSG00000104951	IL4I1
14692.2	0.105868	0.0455235	2.32557	0.0200416	0.171633	ENSG00000133030	MPRIP
39.8317	-0.784541	0.337399	-2.32526	0.0200581	0.171633	ENSG00000153208	MERTK
52.3458	0.386961	0.16642	2.3252	0.020061	0.171633	ENSG00000183562	NA
2750.88	-0.167012	0.0718614	-2.32409	0.0201205	0.172043	ENSG00000198898	CAPZA2
17895.8	-0.214729	0.0924007	-2.32389	0.0201315	0.172043	ENSG00000211459	MT-RNR1
1170.6	-0.162102	0.0697718	-2.32332	0.020162	0.172129	ENSG00000198585	NUDT16
152.422	-0.32196	0.13858	-2.32328	0.0201642	0.172129	ENSG00000229619	MBNL1-AS1
279.94	-0.192748	0.0829861	-2.32266	0.0201975	0.172318	ENSG00000267278	MAP3K14-AS1
264.7	-0.244433	0.105268	-2.322	0.0202329	0.172487	ENSG00000004660	CAMKK1
279.502	-0.117076	0.0504233	-2.32187	0.02024	0.172487	ENSG00000114107	CEP70
1073.85	0.0742786	0.0320013	2.32111	0.0202807	0.172737	ENSG00000165861	ZFYVE1
963.109	0.14046	0.0605289	2.32055	0.0203111	0.172834	ENSG00000178761	FAM219B
4738.15	0.210963	0.0909132	2.32048	0.0203147	0.172834	ENSG00000073350	LLGL2
106.704	-0.204624	0.0881941	-2.32015	0.0203326	0.172889	ENSG00000146733	PSPH
1777.66	0.169162	0.0729426	2.31912	0.0203886	0.173269	ENSG00000173517	PEAK1
112.357	0.334311	0.144196	2.31845	0.0204248	0.173391	ENSG00000189136	UBE2Q2P1
6876.8	0.144763	0.0624398	2.31843	0.0204257	0.173391	ENSG00000143774	GUK1
1519.25	0.119627	0.0516211	2.3174	0.020482	0.173684	ENSG00000114544	SLC41A3
1005.97	0.4192	0.180894	2.31738	0.020483	0.173684	ENSG00000280138	NA
2093.39	-0.10929	0.0471659	-2.31714	0.0204961	0.173698	ENSG00000100883	SRP54
301.952	-0.2562	0.110646	-2.31549	0.0205862	0.174365	ENSG00000132535	DLG4
28.5606	-0.894112	0.386237	-2.31493	0.0206167	0.174481	ENSG00000105501	SIGLEC5
1304.66	-0.165584	0.0715374	-2.31465	0.0206322	0.174481	ENSG00000268027	NA
30.9204	-0.539786	0.23323	-2.3144	0.0206459	0.174481	ENSG00000224769	MUC20P1
5447.15	-0.136653	0.0590513	-2.31414	0.0206599	0.174481	ENSG00000061273	HDAC7
25.5271	-0.452899	0.195716	-2.31406	0.0206643	0.174481	ENSG00000241527	CA15P1
1981.24	0.110512	0.0477646	2.31368	0.0206853	0.174481	ENSG00000109381	ELF2
356.386	-0.246358	0.106483	-2.3136	0.0206899	0.174481	ENSG00000178966	RMI1
179.878	-0.333046	0.143953	-2.31357	0.0206914	0.174481	ENSG00000123473	STIL
701.94	0.259534	0.112233	2.31246	0.0207521	0.174896	ENSG00000127418	FGFRL1
284.552	0.129388	0.0559677	2.31184	0.0207865	0.175089	ENSG00000181350	LRRC75A
156.495	0.242016	0.104705	2.31141	0.02081	0.17519	ENSG00000177465	ACOT4
3491.49	-0.122603	0.0530535	-2.31093	0.0208366	0.175246	ENSG00000177889	UBE2N
11265.1	0.114788	0.0496749	2.31078	0.0208449	0.175246	ENSG00000198286	CARD11
15203.8	0.192855	0.083463	2.31067	0.0208512	0.175246	ENSG00000028137	TNFRSF1B
349.208	0.168819	0.0730685	2.31042	0.020865	0.175266	ENSG00000188295	ZNF669
188.992	-0.118291	0.0512372	-2.30869	0.0209608	0.175929	ENSG00000140543	DET1
886.406	-0.13798	0.0597684	-2.30858	0.020967	0.175929	ENSG00000167196	FBXO22
3270.74	0.107917	0.0467527	2.30825	0.0209852	0.175985	ENSG00000126391	FRMD8
5297.43	-0.124524	0.0539542	-2.30795	0.0210019	0.176028	ENSG00000253352	TUG1
590.301	0.159715	0.0692094	2.3077	0.0210158	0.176048	ENSG00000164758	MED30
78060.2	-0.145553	0.0631113	-2.3063	0.0210941	0.176606	ENSG00000210082	MT-RNR2
6435.49	0.1338	0.0580313	2.30566	0.0211298	0.176789	ENSG00000197226	TBC1D9B
5072.52	-0.148529	0.0644292	-2.3053	0.0211498	0.176789	ENSG00000144381	HSPD1
2345.45	0.0924523	0.0401083	2.30507	0.0211628	0.176789	ENSG00000138802	SEC24B
297.561	-0.748677	0.324806	-2.305	0.0211667	0.176789	ENSG00000151948	GLT1D1
143.235	-0.378238	0.164104	-2.30487	0.0211739	0.176789	ENSG00000180543	TSPYL5
446.844	0.202923	0.0880532	2.30455	0.0211916	0.17684	ENSG00000037042	TUBG2
20894.1	0.06634	0.0287902	2.30425	0.0212084	0.176884	ENSG00000144028	SNRNP200
4285.1	-0.131215	0.0569622	-2.30355	0.0212482	0.177066	ENSG00000075884	ARHGAP15
1639.88	0.212333	0.0921825	2.3034	0.0212562	0.177066	ENSG00000113811	SELENOK
1207.84	-0.0978693	0.0424964	-2.303	0.0212789	0.177066	ENSG00000050130	JKAMP
1123.97	0.0676686	0.0293838	2.30292	0.0212833	0.177066	ENSG00000082068	WDR70
2416.79	0.0827395	0.0359302	2.30278	0.021291	0.177066	ENSG00000104064	GABPB1
446.736	-0.144952	0.0629536	-2.30252	0.021306	0.177066	ENSG00000183323	CCDC125
70.9013	-0.358264	0.155603	-2.30242	0.0213115	0.177066	ENSG00000175707	KDF1
19794.8	0.170011	0.0738564	2.30191	0.0213403	0.177197	ENSG00000133639	BTG1
1100.31	0.105009	0.0456217	2.30173	0.0213506	0.177197	ENSG00000116525	TRIM62
626.989	-0.148716	0.064618	-2.30147	0.0213652	0.177222	ENSG00000142065	ZFP14
8200.03	0.0935767	0.0406652	2.30115	0.0213832	0.177275	ENSG00000104824	HNRNPL
4714.64	0.154026	0.0669511	2.30057	0.0214161	0.177431	ENSG00000144674	GOLGA4
112.62	-0.255446	0.111044	-2.3004	0.0214254	0.177431	ENSG00000229692	SOS1-IT1
61.6364	-0.202878	0.0882043	-2.30009	0.0214429	0.177445	ENSG00000175449	RFESD
1604.11	0.0845933	0.0367808	2.29993	0.0214522	0.177445	ENSG00000196943	NOP9
643.279	-0.161103	0.070052	-2.29976	0.0214619	0.177445	ENSG00000117593	DARS2
1491.34	0.117198	0.0509846	2.29869	0.0215227	0.177817	ENSG00000160959	LRRC14
196.898	-0.614291	0.267256	-2.29851	0.0215326	0.177817	ENSG00000187554	TLR5
62.7262	-0.471024	0.204987	-2.29783	0.0215715	0.177817	ENSG00000251364	SYT9-AS1
1795.08	0.11749	0.0511326	2.29776	0.0215756	0.177817	ENSG00000106397	PLOD3
29.4804	-0.379105	0.164995	-2.29767	0.0215804	0.177817	ENSG00000247134	NA
7498.62	0.112139	0.0488073	2.29758	0.0215854	0.177817	ENSG00000126777	KTN1
16501.6	0.127541	0.0555144	2.29744	0.0215939	0.177817	ENSG00000125637	PSD4
228.922	-0.182028	0.0792414	-2.29713	0.0216114	0.177817	ENSG00000245552	LNCRNA-IUR
683.465	-0.255326	0.111151	-2.29712	0.0216119	0.177817	ENSG00000173083	HPSE
28.5967	0.35143	0.153009	2.29679	0.0216308	0.177844	ENSG00000233892	PAIP1P1
4192.3	-0.0691783	0.0301219	-2.29661	0.0216408	0.177844	ENSG00000125952	MAX
413.46	-0.205467	0.0894716	-2.29645	0.0216502	0.177844	ENSG00000260916	CCPG1
852.21	-0.119688	0.0521369	-2.29565	0.0216962	0.178126	ENSG00000120333	MRPS14
328.681	0.525113	0.228778	2.2953	0.0217162	0.178194	ENSG00000282939	TRBV7-2
555.669	-0.132365	0.0576839	-2.29466	0.0217526	0.178314	ENSG00000103995	CEP152
1794.88	0.172378	0.0751271	2.29448	0.0217628	0.178314	ENSG00000121274	TENT4B
204.704	0.306408	0.133544	2.29443	0.0217659	0.178314	ENSG00000269688	NA
1637.78	-0.100426	0.0437808	-2.29383	0.0218001	0.178468	ENSG00000144635	DYNC1LI1
2883.27	-0.108993	0.0475187	-2.29369	0.0218081	0.178468	ENSG00000103194	USP10
769.066	0.107989	0.0470871	2.29339	0.0218254	0.178514	ENSG00000004139	SARM1
9086.52	0.0823721	0.0359271	2.29276	0.0218621	0.178611	ENSG00000181555	SETD2
49.0756	-0.744049	0.324533	-2.29268	0.0218666	0.178611	ENSG00000170425	ADORA2B
107.563	-0.48358	0.210933	-2.29258	0.0218724	0.178611	ENSG00000156970	BUB1B
168.344	-0.407252	0.177669	-2.29219	0.0218947	0.178697	ENSG00000142945	KIF2C
1207.58	-0.192273	0.0839009	-2.29167	0.021925	0.178849	ENSG00000110315	RNF141
153.325	0.130251	0.0568619	2.29066	0.0219831	0.179168	ENSG00000042317	SPATA7
50.3488	-0.534759	0.233477	-2.29042	0.021997	0.179168	ENSG00000177425	PAWR
3164.83	0.223778	0.0977037	2.29038	0.0219994	0.179168	ENSG00000141582	CBX4
1875.91	-0.0922898	0.0403214	-2.28886	0.0220878	0.179792	ENSG00000116906	GNPAT
543.562	0.0942692	0.0411951	2.28836	0.0221167	0.179831	ENSG00000103042	SLC38A7
2076.96	0.192759	0.084236	2.28832	0.0221186	0.179831	ENSG00000139116	KIF21A
1660.71	-0.199091	0.0870089	-2.28816	0.0221279	0.179831	ENSG00000167325	RRM1
296.596	-0.518071	0.226448	-2.28781	0.0221486	0.179882	ENSG00000260807	CEROX1
42.6391	0.190049	0.083076	2.28765	0.0221578	0.179882	ENSG00000225335	NA
27.9882	-0.748989	0.327477	-2.28715	0.0221873	0.180025	ENSG00000088826	SMOX
391.133	-0.202332	0.0884992	-2.28626	0.022239	0.180349	ENSG00000153140	CETN3
31.2512	-0.59646	0.260973	-2.28552	0.0222823	0.180565	ENSG00000106537	TSPAN13
154.869	0.161219	0.0705506	2.28515	0.0223041	0.180565	ENSG00000180423	HARBI1
259.798	-0.493451	0.215949	-2.28504	0.0223106	0.180565	ENSG00000143476	DTL
1132.14	-0.213449	0.0934197	-2.28483	0.0223226	0.180565	ENSG00000128000	ZNF780B
6715.38	-0.0738939	0.032344	-2.28462	0.0223349	0.180565	ENSG00000162521	RBBP4
243.822	-0.15615	0.0683536	-2.28445	0.0223453	0.180565	ENSG00000151287	TEX30
2146.92	0.0990015	0.0433401	2.28429	0.0223543	0.180565	ENSG00000071462	BUD23
5613.18	-0.119573	0.0523496	-2.28413	0.022364	0.180565	ENSG00000010292	NCAPD2
380.906	-0.642612	0.281355	-2.28399	0.0223722	0.180565	ENSG00000159339	PADI4
94.3215	-1.17488	0.514525	-2.28343	0.022405	0.180733	ENSG00000096006	CRISP3
840.399	0.272901	0.119581	2.28215	0.0224808	0.181249	ENSG00000128487	SPECC1
85.9077	0.185475	0.0812961	2.28147	0.0225206	0.181474	ENSG00000267102	NA
1218	0.0975703	0.0427771	2.2809	0.0225542	0.181649	ENSG00000164331	ANKRA2
2768.66	-0.118799	0.052095	-2.28043	0.022582	0.181695	ENSG00000103769	RAB11A
1776.37	-0.0639051	0.0280236	-2.2804	0.0225838	0.181695	ENSG00000162869	PPP1R21
25.1768	-0.361739	0.158663	-2.27992	0.0226123	0.181829	ENSG00000254231	WWP1-AS1
4161.4	0.0921746	0.0404349	2.27958	0.0226327	0.181897	ENSG00000124789	NUP153
97.3612	0.30425	0.133502	2.279	0.0226669	0.182075	ENSG00000228340	MIR646HG
2318.92	-0.167547	0.0735257	-2.27875	0.0226816	0.182098	ENSG00000128245	YWHAH
646.326	0.126065	0.0553458	2.27777	0.0227405	0.182474	ENSG00000157778	PSMG3
39.8035	-0.285249	0.125247	-2.27748	0.0227573	0.182479	ENSG00000279265	NA
477.816	-0.231916	0.101844	-2.27716	0.0227765	0.182479	ENSG00000247828	TMEM161B-DT
211.785	-0.667507	0.293132	-2.27716	0.0227769	0.182479	ENSG00000186049	KRT73
114.941	-0.236363	0.10382	-2.27665	0.022807	0.18255	ENSG00000151474	FRMD4A
1182.25	0.122872	0.0539717	2.27661	0.0228097	0.18255	ENSG00000172765	TMCC1
1455.91	0.113521	0.0498787	2.27594	0.0228496	0.182773	ENSG00000165661	QSOX2
60.0699	-0.535335	0.235276	-2.27535	0.0228848	0.182958	ENSG00000164045	CDC25A
2370.64	-0.118214	0.0519718	-2.27459	0.0229307	0.183229	ENSG00000144744	UBA3
67.9341	-0.381978	0.168024	-2.27335	0.0230052	0.183665	ENSG00000112137	PHACTR1
713.931	-0.227069	0.099896	-2.27305	0.0230231	0.183665	ENSG00000188191	PRKAR1B
446.263	0.776482	0.341615	2.27297	0.023028	0.183665	ENSG00000228314	CYP4F29P
5665.61	0.111721	0.0491542	2.27286	0.0230344	0.183665	ENSG00000176994	SMCR8
1735.15	-0.0802057	0.0352944	-2.27248	0.0230576	0.183665	ENSG00000176623	RMDN1
2016.11	0.088212	0.0388178	2.27246	0.0230585	0.183665	ENSG00000130559	CAMSAP1
1333.43	-0.243735	0.107265	-2.27228	0.0230695	0.183665	ENSG00000170006	TMEM154
2593.04	-0.267008	0.117522	-2.27198	0.0230877	0.183713	ENSG00000179820	MYADM
545.179	-0.170048	0.0748766	-2.27104	0.0231446	0.18407	ENSG00000138794	CASP6
4544.89	0.0487651	0.0214789	2.27038	0.0231848	0.184294	ENSG00000114316	USP4
8612.43	0.1768	0.0778931	2.26978	0.023221	0.18436	ENSG00000047365	ARAP2
43.9073	-0.246719	0.108706	-2.26959	0.0232322	0.18436	ENSG00000278376	NA
39.4062	0.438774	0.193344	2.26939	0.0232445	0.18436	ENSG00000269951	NA
1533.63	0.117321	0.0517061	2.269	0.0232682	0.18436	ENSG00000063854	HAGH
619.274	0.15536	0.0684733	2.26892	0.0232733	0.18436	ENSG00000013016	EHD3
138.286	-0.51855	0.228552	-2.26885	0.0232773	0.18436	ENSG00000127564	PKMYT1
500.973	-0.598704	0.263881	-2.26884	0.0232778	0.18436	ENSG00000101307	SIRPB1
10760.9	-0.0869128	0.0383145	-2.2684	0.0233047	0.184477	ENSG00000138668	HNRNPD
52.0694	-0.562788	0.248145	-2.26798	0.0233307	0.184587	ENSG00000166803	PCLAF
5811.72	-0.113263	0.0499554	-2.26729	0.0233725	0.184778	ENSG00000140350	ANP32A
33.8533	-0.587119	0.258965	-2.26718	0.0233793	0.184778	ENSG00000179750	APOBEC3B
2158.72	-0.172139	0.0759329	-2.26699	0.0233911	0.184778	ENSG00000148908	RGS10
15970.3	0.10852	0.047883	2.26635	0.02343	0.184989	ENSG00000130723	NA
41.8356	-0.303685	0.13404	-2.26564	0.0234737	0.185238	ENSG00000091136	LAMB1
435.434	0.384345	0.169682	2.26509	0.0235071	0.185406	ENSG00000225079	FTH1P22
5384.78	0.124205	0.0548408	2.26483	0.0235233	0.185408	ENSG00000124496	TRERF1
29.3025	-0.361499	0.159624	-2.26469	0.0235317	0.185408	ENSG00000237429	NA
254.634	0.117199	0.051757	2.26441	0.0235487	0.185446	ENSG00000127080	IPPK
16432.5	-0.132934	0.0587182	-2.26393	0.0235782	0.185583	ENSG00000187109	NAP1L1
1473.32	0.131498	0.0581032	2.26318	0.0236243	0.185806	ENSG00000204516	MICB
1867.67	-0.195287	0.0862926	-2.26308	0.023631	0.185806	ENSG00000186815	TPCN1
35.046	-0.258265	0.114161	-2.26229	0.0236798	0.186094	ENSG00000260773	NA
440.789	-0.138773	0.0613478	-2.26207	0.0236933	0.186104	ENSG00000152193	OBI1
25.4344	-0.327104	0.144657	-2.26124	0.0237445	0.186328	ENSG00000261353	NA
625.487	-0.0971129	0.0429473	-2.26121	0.0237462	0.186328	ENSG00000112167	SAYSD1
391.042	0.193064	0.0854022	2.26065	0.0237811	0.18646	ENSG00000187741	FANCA
50.9563	0.391186	0.173075	2.26021	0.0238081	0.18646	ENSG00000237471	NA
37.3488	-0.452349	0.200144	-2.26012	0.0238138	0.18646	ENSG00000091262	ABCC6
247.878	-0.359134	0.158908	-2.26002	0.02382	0.18646	ENSG00000111206	FOXM1
63.9758	-0.316795	0.140191	-2.25974	0.0238373	0.18646	ENSG00000119608	PROX2
235.138	-0.14125	0.0625094	-2.25966	0.0238426	0.18646	ENSG00000231999	LRRC8C-DT
279.425	0.603815	0.267227	2.25956	0.0238487	0.18646	ENSG00000170624	SGCD
32.896	-0.273808	0.121209	-2.25898	0.0238846	0.186645	ENSG00000215022	LOC100130357
596.919	-0.141311	0.0625825	-2.258	0.0239458	0.187025	ENSG00000183520	UTP11
1035.95	-0.0624717	0.0276692	-2.25781	0.0239578	0.187025	ENSG00000151353	TMEM18
2263.47	0.0823695	0.0364903	2.2573	0.0239893	0.187037	ENSG00000095059	DHPS
1129.51	0.0729747	0.0323287	2.25727	0.0239911	0.187037	ENSG00000168575	SLC20A2
1904.06	-0.139851	0.061958	-2.25719	0.0239961	0.187037	ENSG00000095002	MSH2
14081.7	-0.263273	0.116658	-2.2568	0.0240208	0.187134	ENSG00000103187	COTL1
93.2932	-0.39283	0.174129	-2.25597	0.0240728	0.187443	ENSG00000114529	C3orf52
83.5415	-0.223435	0.0990915	-2.25484	0.0241436	0.187799	ENSG00000260837	NA
327.215	0.228237	0.101225	2.25475	0.0241492	0.187799	ENSG00000279457	WASH9P
55.2102	-0.347844	0.154279	-2.25465	0.0241555	0.187799	ENSG00000003147	ICA1
33.2668	-0.316364	0.140337	-2.25431	0.0241767	0.187868	ENSG00000211885	TRAJ4
4866.21	0.104995	0.0466344	2.25145	0.024357	0.18908	ENSG00000134684	YARS1
688.308	-0.120664	0.0535987	-2.25125	0.0243696	0.18908	ENSG00000152240	HAUS1
80.9391	0.273675	0.121566	2.25125	0.0243699	0.18908	ENSG00000256705	NA
4862.92	-0.189578	0.084219	-2.25101	0.0243849	0.189101	ENSG00000131238	PPT1
30.4298	-0.371468	0.165053	-2.25059	0.0244112	0.189209	ENSG00000104147	OIP5
356.888	-0.475381	0.211284	-2.24997	0.0244511	0.189333	ENSG00000211721	TRBV6-5
324.248	-0.277996	0.123556	-2.24995	0.0244521	0.189333	ENSG00000198814	GK
72.8197	-0.638312	0.283907	-2.24832	0.0245559	0.189928	ENSG00000120949	TNFRSF8
4319.84	-0.136351	0.0606485	-2.24822	0.024562	0.189928	ENSG00000184432	COPB2
31.8146	-0.293852	0.130714	-2.24805	0.0245728	0.189928	ENSG00000114854	TNNC1
3992.04	0.07888	0.0350917	2.24783	0.0245872	0.189928	ENSG00000074054	CLASP1
107.969	-0.271931	0.120979	-2.24776	0.0245912	0.189928	ENSG00000070404	FSTL3
5464.65	0.141242	0.0628433	2.24753	0.024606	0.189946	ENSG00000112511	PHF1
76.3541	-0.255208	0.113572	-2.24711	0.0246329	0.190057	ENSG00000273237	NA
1255.98	-0.160642	0.0714975	-2.24682	0.0246513	0.190103	ENSG00000076555	ACACB
123335	0.112568	0.0501124	2.24632	0.0246837	0.190257	ENSG00000265972	TXNIP
48.8814	-0.238394	0.10614	-2.24603	0.0247022	0.190303	ENSG00000079150	FKBP7
804.732	-0.326304	0.145317	-2.24546	0.0247384	0.190407	ENSG00000143162	CREG1
60.6561	-0.780059	0.347399	-2.24543	0.0247407	0.190407	ENSG00000134489	HRH4
119.846	0.323779	0.144247	2.24461	0.0247929	0.19061	ENSG00000279355	NA
32.5469	-0.264406	0.117805	-2.24445	0.0248035	0.19061	ENSG00000226352	PSPC1-AS2
31.1965	-0.359543	0.160193	-2.24443	0.0248046	0.19061	ENSG00000277978	NA
341.015	0.188889	0.0841985	2.24338	0.0248721	0.191033	ENSG00000179988	PSTK
84.199	-0.276395	0.123259	-2.24238	0.0249367	0.191286	ENSG00000183281	PLGLB1
3760.8	-0.458578	0.204516	-2.24226	0.0249444	0.191286	ENSG00000114737	CISH
825.802	-0.138415	0.0617303	-2.24226	0.0249447	0.191286	ENSG00000146085	MMUT
36.1231	0.401542	0.179092	2.24209	0.0249553	0.191286	ENSG00000124391	IL17C
111.665	0.210044	0.0937301	2.24095	0.0250296	0.191672	ENSG00000250539	KRT8P33
1757.19	-0.107165	0.0478247	-2.24078	0.0250402	0.191672	ENSG00000166260	COX11
5032.94	0.172416	0.0769462	2.24073	0.0250434	0.191672	ENSG00000196547	MAN2A2
2372.54	0.0916204	0.0408971	2.24027	0.0250735	0.191807	ENSG00000166579	NDEL1
187.623	-0.41472	0.185159	-2.2398	0.0251037	0.191809	ENSG00000111537	IFNG
4903.15	0.0820643	0.0366394	2.23978	0.0251051	0.191809	ENSG00000144021	CIAO1
729.181	0.129771	0.0579462	2.23952	0.0251223	0.191809	ENSG00000197951	ZNF71
1856.81	-0.158505	0.0707772	-2.23949	0.0251241	0.191809	ENSG00000119820	YIPF4
122.714	0.206709	0.0923313	2.23877	0.0251706	0.192032	ENSG00000279086	NA
333.045	-0.512724	0.229032	-2.23865	0.0251785	0.192032	ENSG00000230202	NA
[truncated: 13,247 more rows]

## Sheet: SupTable_S5
GOBP	name	nAnno	nOverlap	fc	zscore	pvalue	adjp	or	CIl	CIu	riskAllele_direction
GO:0016266	O-glycan processing	34	6	5.82	4.98	5.9e-05	0.0044	6.94	2.34	17.2	repressed
GO:0016579	protein deubiquitination	233	17	2.41	3.83	0.00027	0.0069	2.58	1.46	4.29	repressed
GO:0035556	intracellular signal transduction	275	19	2.28	3.79	0.00028	0.0069	2.44	1.43	3.94	repressed
GO:0071222	cellular response to lipopolysaccharide	85	8	3.1	3.44	0.0011	0.02	3.37	1.39	7.04	repressed
GO:0000187	activation of MAPK activity	75	7	3.08	3.19	0.0019	0.028	3.33	1.28	7.31	repressed
GO:0010976	positive regulation of neuron projection development	61	6	3.24	3.11	0.0024	0.029	3.53	1.23	8.24	repressed
GO:0032436	positive regulation of proteasomal ubiquitin-dependent protein catabolic process	63	6	3.14	3.01	0.0029	0.029	3.4	1.19	7.94	repressed
GO:0014066	regulation of phosphatidylinositol 3-kinase signaling	49	5	3.36	2.93	0.0035	0.029	3.67	1.13	9.29	repressed
GO:0006366	transcription from RNA polymerase II promoter	361	20	1.83	2.82	0.0034	0.029	1.92	1.15	3.06	repressed
GO:0048010	vascular endothelial growth factor receptor signaling pathway	54	5	3.05	2.67	0.0057	0.042	3.29	1.02	8.28	repressed
GO:0071356	cellular response to tumor necrosis factor	61	5	2.7	2.36	0.01	0.064	2.88	0.895	7.18	repressed
GO:0030154	cell differentiation	254	14	1.82	2.33	0.011	0.064	1.9	1.01	3.28	repressed
GO:0018105	peptidyl-serine phosphorylation	123	8	2.14	2.26	0.013	0.064	2.25	0.942	4.63	repressed
GO:0045944	positive regulation of transcription from RNA polymerase II promoter	641	29	1.49	2.26	0.012	0.064	1.56	1.02	2.29	repressed
GO:0006511	ubiquitin-dependent protein catabolic process	125	8	2.11	2.21	0.014	0.064	2.21	0.926	4.54	repressed
GO:0030168	platelet activation	84	6	2.36	2.2	0.014	0.064	2.48	0.878	5.7	repressed
GO:0070374	positive regulation of ERK1 and ERK2 cascade	89	6	2.22	2.05	0.018	0.076	2.33	0.827	5.34	repressed
GO:0007186	G-protein coupled receptor signaling pathway	178	10	1.85	2.03	0.02	0.076	1.93	0.9	3.67	repressed
GO:0000122	negative regulation of transcription from RNA polymerase II promoter	506	23	1.5	2.02	0.02	0.076	1.55	0.964	2.4	repressed
GO:0007155	cell adhesion	226	12	1.75	2.01	0.021	0.076	1.82	0.916	3.28	repressed
GO:0043123	positive regulation of I-kappaB kinase/NF-kappaB signaling	141	8	1.87	1.84	0.028	0.098	1.94	0.816	3.98	repressed
GO:0006468	protein phosphorylation	370	17	1.52	1.78	0.033	0.1	1.56	0.891	2.57	repressed
GO:0043547	positive regulation of GTPase activity	424	19	1.48	1.77	0.034	0.1	1.52	0.898	2.45	repressed
GO:0016055	Wnt signaling pathway	124	7	1.86	1.7	0.035	0.1	1.93	0.754	4.14	repressed
GO:0051726	regulation of cell cycle	80	5	2.06	1.68	0.034	0.1	2.15	0.673	5.28	repressed
GO:0001666	response to hypoxia	103	6	1.92	1.66	0.037	0.1	1.99	0.709	4.54	repressed
GO:0038096	Fc-gamma receptor signaling pathway involved in phagocytosis	81	5	2.04	1.65	0.036	0.1	2.12	0.665	5.2	repressed
GO:0007165	signal transduction	681	28	1.36	1.69	0.041	0.11	1.4	0.91	2.08	repressed
GO:0006954	inflammatory response	230	11	1.58	1.56	0.048	0.12	1.62	0.792	2.99	repressed
GO:0050852	T cell receptor signaling pathway	138	7	1.67	1.4	0.059	0.15	1.72	0.674	3.68	repressed
GO:0015031	protein transport	296	13	1.45	1.38	0.067	0.15	1.48	0.774	2.61	repressed
GO:0050900	leukocyte migration	118	6	1.68	1.31	0.068	0.15	1.72	0.616	3.9	repressed
GO:0006810	transport	143	7	1.61	1.31	0.07	0.15	1.66	0.65	3.54	repressed
GO:0007411	axon guidance	94	5	1.75	1.3	0.066	0.15	1.81	0.569	4.41	repressed
GO:0016477	cell migration	119	6	1.66	1.28	0.07	0.15	1.71	0.61	3.87	repressed
GO:0045087	innate immune response	277	12	1.43	1.27	0.08	0.15	1.46	0.739	2.63	repressed
GO:0006914	autophagy	96	5	1.72	1.25	0.071	0.15	1.77	0.557	4.31	repressed
GO:0051607	defense response to virus	123	6	1.61	1.2	0.08	0.15	1.65	0.59	3.73	repressed
GO:0007264	small GTPase mediated signal transduction	99	5	1.67	1.18	0.08	0.15	1.71	0.54	4.17	repressed
GO:0008360	regulation of cell shape	100	5	1.65	1.15	0.083	0.15	1.69	0.534	4.12	repressed
GO:0007507	heart development	102	5	1.62	1.11	0.09	0.16	1.66	0.523	4.03	repressed
GO:0008285	negative regulation of cell proliferation	265	11	1.37	1.07	0.11	0.19	1.4	0.682	2.57	repressed
GO:0038095	Fc-epsilon receptor signaling pathway	134	6	1.48	0.98	0.11	0.19	1.51	0.539	3.4	repressed
GO:0006357	regulation of transcription from RNA polymerase II promoter	297	12	1.33	1.02	0.12	0.2	1.36	0.687	2.44	repressed
GO:0050776	regulation of immune response	111	5	1.49	0.908	0.12	0.2	1.51	0.479	3.68	repressed
GO:0051092	positive regulation of NF-kappaB transcription factor activity	118	5	1.4	0.767	0.15	0.24	1.42	0.45	3.44	repressed
GO:0007275	multicellular organism development	256	10	1.29	0.823	0.16	0.25	1.31	0.614	2.47	repressed
GO:0007050	cell cycle arrest	122	5	1.35	0.69	0.17	0.26	1.37	0.435	3.32	repressed
GO:0000086	G2/M transition of mitotic cell cycle	124	5	1.33	0.652	0.17	0.26	1.35	0.427	3.26	repressed
GO:0006955	immune response	239	9	1.24	0.667	0.19	0.27	1.26	0.563	2.45	repressed
GO:0001525	angiogenesis	125	5	1.32	0.634	0.18	0.27	1.34	0.424	3.23	repressed
GO:0001701	in utero embryonic development	127	5	1.3	0.597	0.19	0.27	1.31	0.417	3.18	repressed
GO:0042981	regulation of apoptotic process	139	5	1.19	0.39	0.25	0.34	1.2	0.38	2.88	repressed
GO:0000209	protein polyubiquitination	200	7	1.15	0.388	0.26	0.36	1.16	0.458	2.46	repressed
GO:0006351	transcription, DNA-templated	1361	44	1.07	0.455	0.29	0.39	1.08	0.765	1.48	repressed
GO:0007399	nervous system development	149	5	1.11	0.231	0.3	0.39	1.11	0.354	2.68	repressed
GO:0016032	viral process	272	9	1.09	0.268	0.31	0.41	1.1	0.492	2.14	repressed
GO:0008283	cell proliferation	252	8	1.05	0.133	0.36	0.45	1.05	0.445	2.12	repressed
GO:0006508	proteolysis	253	8	1.04	0.121	0.36	0.45	1.04	0.443	2.11	repressed
GO:0042493	response to drug	192	6	1.03	0.0752	0.36	0.45	1.03	0.372	2.31	repressed
GO:0006974	cellular response to DNA damage stimulus	193	6	1.03	0.0622	0.37	0.45	1.03	0.37	2.3	repressed
GO:0016567	protein ubiquitination	323	10	1.02	0.0672	0.39	0.47	1.02	0.481	1.93	repressed
GO:0006355	regulation of transcription, DNA-templated	985	30	1	0.0249	0.44	0.51	1	0.664	1.47	repressed
GO:0043065	positive regulation of apoptotic process	239	7	0.966	-0.0944	0.44	0.51	0.964	0.381	2.04	repressed
GO:0045892	negative regulation of transcription, DNA-templated	347	10	0.95	-0.166	0.48	0.55	0.948	0.447	1.78	repressed
GO:0008150	biological_process	381	11	0.952	-0.168	0.49	0.55	0.949	0.466	1.74	repressed
GO:0006915	apoptotic process	424	12	0.933	-0.247	0.52	0.58	0.929	0.472	1.66	repressed
GO:0045893	positive regulation of transcription, DNA-templated	371	10	0.889	-0.384	0.57	0.62	0.883	0.416	1.66	repressed
GO:0043066	negative regulation of apoptotic process	321	8	0.822	-0.572	0.64	0.69	0.814	0.346	1.64	repressed
GO:0055114	oxidation-reduction process	401	10	0.822	-0.639	0.68	0.7	0.813	0.384	1.53	repressed
GO:0007049	cell cycle	220	5	0.749	-0.663	0.66	0.7	0.74	0.237	1.77	repressed
GO:0000398	mRNA splicing, via spliceosome	225	5	0.733	-0.715	0.68	0.7	0.723	0.231	1.73	repressed
GO:0051301	cell division	295	6	0.671	-1.01	0.8	0.81	0.659	0.238	1.46	repressed
GO:0043312	neutrophil degranulation	435	5	0.379	-2.33	0.99	0.99	0.364	0.117	0.863	repressed
GO:0016266	O-glycan processing	34	6	5.82	4.98	5.9e-05	0.0044	6.94	2.34	17.2	induced
GO:0016579	protein deubiquitination	233	17	2.41	3.83	0.00027	0.0069	2.58	1.46	4.29	induced
GO:0035556	intracellular signal transduction	275	19	2.28	3.79	0.00028	0.0069	2.44	1.43	3.94	induced
GO:0071222	cellular response to lipopolysaccharide	85	8	3.1	3.44	0.0011	0.02	3.37	1.39	7.04	induced
GO:0000187	activation of MAPK activity	75	7	3.08	3.19	0.0019	0.028	3.33	1.28	7.31	induced
GO:0010976	positive regulation of neuron projection development	61	6	3.24	3.11	0.0024	0.029	3.53	1.23	8.24	induced
GO:0032436	positive regulation of proteasomal ubiquitin-dependent protein catabolic process	63	6	3.14	3.01	0.0029	0.029	3.4	1.19	7.94	induced
GO:0014066	regulation of phosphatidylinositol 3-kinase signaling	49	5	3.36	2.93	0.0035	0.029	3.67	1.13	9.29	induced
GO:0006366	transcription from RNA polymerase II promoter	361	20	1.83	2.82	0.0034	0.029	1.92	1.15	3.06	induced
GO:0048010	vascular endothelial growth factor receptor signaling pathway	54	5	3.05	2.67	0.0057	0.042	3.29	1.02	8.28	induced
GO:0071356	cellular response to tumor necrosis factor	61	5	2.7	2.36	0.01	0.064	2.88	0.895	7.18	induced
GO:0030154	cell differentiation	254	14	1.82	2.33	0.011	0.064	1.9	1.01	3.28	induced
GO:0018105	peptidyl-serine phosphorylation	123	8	2.14	2.26	0.013	0.064	2.25	0.942	4.63	induced
GO:0045944	positive regulation of transcription from RNA polymerase II promoter	641	29	1.49	2.26	0.012	0.064	1.56	1.02	2.29	induced
GO:0006511	ubiquitin-dependent protein catabolic process	125	8	2.11	2.21	0.014	0.064	2.21	0.926	4.54	induced
GO:0030168	platelet activation	84	6	2.36	2.2	0.014	0.064	2.48	0.878	5.7	induced
GO:0070374	positive regulation of ERK1 and ERK2 cascade	89	6	2.22	2.05	0.018	0.076	2.33	0.827	5.34	induced
GO:0007186	G-protein coupled receptor signaling pathway	178	10	1.85	2.03	0.02	0.076	1.93	0.9	3.67	induced
GO:0000122	negative regulation of transcription from RNA polymerase II promoter	506	23	1.5	2.02	0.02	0.076	1.55	0.964	2.4	induced
GO:0007155	cell adhesion	226	12	1.75	2.01	0.021	0.076	1.82	0.916	3.28	induced
GO:0043123	positive regulation of I-kappaB kinase/NF-kappaB signaling	141	8	1.87	1.84	0.028	0.098	1.94	0.816	3.98	induced
GO:0006468	protein phosphorylation	370	17	1.52	1.78	0.033	0.1	1.56	0.891	2.57	induced
GO:0043547	positive regulation of GTPase activity	424	19	1.48	1.77	0.034	0.1	1.52	0.898	2.45	induced
GO:0016055	Wnt signaling pathway	124	7	1.86	1.7	0.035	0.1	1.93	0.754	4.14	induced
GO:0051726	regulation of cell cycle	80	5	2.06	1.68	0.034	0.1	2.15	0.673	5.28	induced
GO:0001666	response to hypoxia	103	6	1.92	1.66	0.037	0.1	1.99	0.709	4.54	induced
GO:0038096	Fc-gamma receptor signaling pathway involved in phagocytosis	81	5	2.04	1.65	0.036	0.1	2.12	0.665	5.2	induced
GO:0007165	signal transduction	681	28	1.36	1.69	0.041	0.11	1.4	0.91	2.08	induced
GO:0006954	inflammatory response	230	11	1.58	1.56	0.048	0.12	1.62	0.792	2.99	induced
GO:0050852	T cell receptor signaling pathway	138	7	1.67	1.4	0.059	0.15	1.72	0.674	3.68	induced
GO:0015031	protein transport	296	13	1.45	1.38	0.067	0.15	1.48	0.774	2.61	induced
GO:0050900	leukocyte migration	118	6	1.68	1.31	0.068	0.15	1.72	0.616	3.9	induced
GO:0006810	transport	143	7	1.61	1.31	0.07	0.15	1.66	0.65	3.54	induced
GO:0007411	axon guidance	94	5	1.75	1.3	0.066	0.15	1.81	0.569	4.41	induced
GO:0016477	cell migration	119	6	1.66	1.28	0.07	0.15	1.71	0.61	3.87	induced
GO:0045087	innate immune response	277	12	1.43	1.27	0.08	0.15	1.46	0.739	2.63	induced
GO:0006914	autophagy	96	5	1.72	1.25	0.071	0.15	1.77	0.557	4.31	induced
GO:0051607	defense response to virus	123	6	1.61	1.2	0.08	0.15	1.65	0.59	3.73	induced
GO:0007264	small GTPase mediated signal transduction	99	5	1.67	1.18	0.08	0.15	1.71	0.54	4.17	induced
GO:0008360	regulation of cell shape	100	5	1.65	1.15	0.083	0.15	1.69	0.534	4.12	induced
GO:0007507	heart development	102	5	1.62	1.11	0.09	0.16	1.66	0.523	4.03	induced
GO:0008285	negative regulation of cell proliferation	265	11	1.37	1.07	0.11	0.19	1.4	0.682	2.57	induced
GO:0038095	Fc-epsilon receptor signaling pathway	134	6	1.48	0.98	0.11	0.19	1.51	0.539	3.4	induced
GO:0006357	regulation of transcription from RNA polymerase II promoter	297	12	1.33	1.02	0.12	0.2	1.36	0.687	2.44	induced
GO:0050776	regulation of immune response	111	5	1.49	0.908	0.12	0.2	1.51	0.479	3.68	induced
GO:0051092	positive regulation of NF-kappaB transcription factor activity	118	5	1.4	0.767	0.15	0.24	1.42	0.45	3.44	induced
GO:0007275	multicellular organism development	256	10	1.29	0.823	0.16	0.25	1.31	0.614	2.47	induced
GO:0007050	cell cycle arrest	122	5	1.35	0.69	0.17	0.26	1.37	0.435	3.32	induced
GO:0000086	G2/M transition of mitotic cell cycle	124	5	1.33	0.652	0.17	0.26	1.35	0.427	3.26	induced
GO:0006955	immune response	239	9	1.24	0.667	0.19	0.27	1.26	0.563	2.45	induced
GO:0001525	angiogenesis	125	5	1.32	0.634	0.18	0.27	1.34	0.424	3.23	induced
GO:0001701	in utero embryonic development	127	5	1.3	0.597	0.19	0.27	1.31	0.417	3.18	induced
GO:0042981	regulation of apoptotic process	139	5	1.19	0.39	0.25	0.34	1.2	0.38	2.88	induced
GO:0000209	protein polyubiquitination	200	7	1.15	0.388	0.26	0.36	1.16	0.458	2.46	induced
GO:0006351	transcription, DNA-templated	1361	44	1.07	0.455	0.29	0.39	1.08	0.765	1.48	induced
GO:0007399	nervous system development	149	5	1.11	0.231	0.3	0.39	1.11	0.354	2.68	induced
GO:0016032	viral process	272	9	1.09	0.268	0.31	0.41	1.1	0.492	2.14	induced
GO:0008283	cell proliferation	252	8	1.05	0.133	0.36	0.45	1.05	0.445	2.12	induced
GO:0006508	proteolysis	253	8	1.04	0.121	0.36	0.45	1.04	0.443	2.11	induced
GO:0042493	response to drug	192	6	1.03	0.0752	0.36	0.45	1.03	0.372	2.31	induced
GO:0006974	cellular response to DNA damage stimulus	193	6	1.03	0.0622	0.37	0.45	1.03	0.37	2.3	induced
GO:0016567	protein ubiquitination	323	10	1.02	0.0672	0.39	0.47	1.02	0.481	1.93	induced
GO:0006355	regulation of transcription, DNA-templated	985	30	1	0.0249	0.44	0.51	1	0.664	1.47	induced
GO:0043065	positive regulation of apoptotic process	239	7	0.966	-0.0944	0.44	0.51	0.964	0.381	2.04	induced
GO:0045892	negative regulation of transcription, DNA-templated	347	10	0.95	-0.166	0.48	0.55	0.948	0.447	1.78	induced
GO:0008150	biological_process	381	11	0.952	-0.168	0.49	0.55	0.949	0.466	1.74	induced
GO:0006915	apoptotic process	424	12	0.933	-0.247	0.52	0.58	0.929	0.472	1.66	induced
GO:0045893	positive regulation of transcription, DNA-templated	371	10	0.889	-0.384	0.57	0.62	0.883	0.416	1.66	induced
GO:0043066	negative regulation of apoptotic process	321	8	0.822	-0.572	0.64	0.69	0.814	0.346	1.64	induced
GO:0055114	oxidation-reduction process	401	10	0.822	-0.639	0.68	0.7	0.813	0.384	1.53	induced
GO:0007049	cell cycle	220	5	0.749	-0.663	0.66	0.7	0.74	0.237	1.77	induced
GO:0000398	mRNA splicing, via spliceosome	225	5	0.733	-0.715	0.68	0.7	0.723	0.231	1.73	induced
GO:0051301	cell division	295	6	0.671	-1.01	0.8	0.81	0.659	0.238	1.46	induced
GO:0043312	neutrophil degranulation	435	5	0.379	-2.33	0.99	0.99	0.364	0.117	0.863	induced

## Sheet: SupTable_S6
baseMean	log2FoldChange	lfcSE	stat	pvalue	padj	ENSG.gene	Gene
98.1154	-0.671381	0.101235	-6.63191	3.31379e-11	5.00481e-07	ENSG00000158406	H4C8
432.255	0.844275	0.136944	6.16509	7.04423e-10	5.31945e-06	ENSG00000211745	TRBV4-2
78.5473	1.00869	0.179257	5.62703	1.83339e-08	7.32387e-05	ENSG00000132185	FCRLA
224.833	0.840172	0.149569	5.61729	1.93971e-08	7.32387e-05	ENSG00000275791	TRBV10-3
5737.86	0.488921	0.0905798	5.39768	6.75072e-08	0.000203912	ENSG00000004399	PLXND1
99.2137	-1.08734	0.205395	-5.29387	1.19752e-07	0.000301435	ENSG00000171246	NPTX1
42.6627	-0.785355	0.149229	-5.26275	1.4192e-07	0.000306203	ENSG00000180066	LINC02870
50.1993	-0.418177	0.0818435	-5.10947	3.23069e-07	0.000609914	ENSG00000258102	MAP1LC3B2
163.851	0.828684	0.162965	5.08504	3.67555e-07	0.000616798	ENSG00000196092	PAX5
56.0544	0.894489	0.176803	5.05923	4.20954e-07	0.000635767	ENSG00000132704	FCRL2
197.138	0.531973	0.105942	5.02136	5.13058e-07	0.000704429	ENSG00000183091	NEB
1996.7	-0.113731	0.0228795	-4.97089	6.66452e-07	0.000824927	ENSG00000141252	VPS53
32.5685	0.755698	0.152402	4.95859	7.10061e-07	0.000824927	ENSG00000184226	PCDH9
70.3155	-0.7202	0.148008	-4.86595	1.1391e-06	0.00122884	ENSG00000114405	C3orf14
698.572	0.244546	0.0512259	4.77388	1.80707e-06	0.00181948	ENSG00000167074	TEF
552.613	-0.142567	0.0300858	-4.73867	2.15127e-06	0.00203066	ENSG00000120519	SLC10A7
17633	0.196761	0.041999	4.68489	2.8011e-06	0.00248853	ENSG00000163346	PBXIP1
485.214	-0.901629	0.193943	-4.64894	3.33643e-06	0.00279945	ENSG00000120875	DUSP4
216.453	0.853227	0.185755	4.59328	4.36332e-06	0.00346838	ENSG00000211898	IGHD
113.137	-0.31125	0.0685703	-4.53913	5.64859e-06	0.00364332	ENSG00000113356	POLR3G
546.18	-0.200409	0.0442021	-4.53393	5.78956e-06	0.00364332	ENSG00000155100	OTUD6B
1636.02	-0.230903	0.0506109	-4.56231	5.05928e-06	0.00364332	ENSG00000164951	PDP1
1562.21	-0.13326	0.0292527	-4.55547	5.22684e-06	0.00364332	ENSG00000174720	LARP7
69.981	0.738441	0.162537	4.54321	5.54033e-06	0.00364332	ENSG00000177455	CD19
590.437	0.540629	0.120658	4.48067	7.44086e-06	0.00388304	ENSG00000105369	CD79A
1027.48	-0.117802	0.0263309	-4.47391	7.68013e-06	0.00388304	ENSG00000106591	MRPL32
782.189	-0.131407	0.0291861	-4.50237	6.72004e-06	0.00388304	ENSG00000138386	NAB1
91.7903	-0.789755	0.176561	-4.473	7.71311e-06	0.00388304	ENSG00000156535	CD109
1471.01	-0.241078	0.0536504	-4.4935	7.00626e-06	0.00388304	ENSG00000197045	GMFB
38.3453	0.458834	0.10197	4.49968	6.80547e-06	0.00388304	ENSG00000223551	TMSB4XP4
196.949	0.167671	0.0376057	4.45867	8.24694e-06	0.00401786	ENSG00000126749	EMG1
107.448	0.846418	0.190203	4.45008	8.58373e-06	0.00405125	ENSG00000143297	FCRL5
3733.97	-0.160676	0.0362675	-4.4303	9.41031e-06	0.00423102	ENSG00000101782	RIOK3
1146.94	-0.390094	0.0881033	-4.42769	9.52491e-06	0.00423102	ENSG00000130844	ZNF331
92.5865	0.294224	0.0670496	4.38815	1.14319e-05	0.00472892	ENSG00000163995	ABLIM2
553.15	0.217966	0.0496378	4.39114	1.12757e-05	0.00472892	ENSG00000179886	TIGD5
428.241	-0.159168	0.0362962	-4.38525	1.15851e-05	0.00472892	ENSG00000183323	CCDC125
660.922	-0.238181	0.0546709	-4.35663	1.32079e-05	0.00484882	ENSG00000122674	CCZ1
1491.43	-0.198092	0.0455165	-4.3521	1.34841e-05	0.00484882	ENSG00000138018	SELENOI
687.418	-0.302255	0.0694119	-4.35451	1.33366e-05	0.00484882	ENSG00000181744	DIPK2A
83.3564	0.23538	0.0540206	4.35723	1.31722e-05	0.00484882	ENSG00000182165	TP53TG1
564.545	-0.297042	0.0681612	-4.35794	1.31293e-05	0.00484882	ENSG00000187951	LOC100288637
218.934	0.180931	0.0418551	4.3228	1.54061e-05	0.00528813	ENSG00000161914	ZNF653
7226.35	-0.111847	0.0258446	-4.32769	1.50683e-05	0.00528813	ENSG00000205581	HMGN1
16070.5	0.164417	0.0382182	4.30206	1.69218e-05	0.00555586	ENSG00000110047	EHD1
840.484	0.133616	0.0310407	4.30454	1.67332e-05	0.00555586	ENSG00000176476	SGF29
821.965	0.450034	0.104786	4.2948	1.74848e-05	0.00561856	ENSG00000211747	TRBV20-1
908.713	-0.189145	0.0443763	-4.2623	2.0233e-05	0.00626536	ENSG00000105849	POLR1F
743.189	-0.199702	0.0468645	-4.26127	2.03273e-05	0.00626536	ENSG00000203668	CHML
42.8814	0.716793	0.168751	4.24764	2.16033e-05	0.00627452	ENSG00000058091	CDK14
332.862	-0.47965	0.112758	-4.25381	2.10163e-05	0.00627452	ENSG00000078804	TP53INP2
1168.3	-0.217082	0.0510784	-4.24997	2.13797e-05	0.00627452	ENSG00000111711	GOLT1B
1323.72	0.190711	0.044984	4.23953	2.2399e-05	0.00638287	ENSG00000088808	PPP1R13B
2614.57	0.215624	0.0509838	4.22926	2.3446e-05	0.0065575	ENSG00000132965	ALOX5AP
76.187	-0.426078	0.100981	-4.21939	2.44965e-05	0.00672674	ENSG00000231607	DLEU2
2935.18	-0.170471	0.0404841	-4.21082	2.54441e-05	0.00686219	ENSG00000133703	KRAS
422.896	-0.619354	0.148164	-4.1802	2.91255e-05	0.00771724	ENSG00000163599	CTLA4
675.276	0.490261	0.117445	4.17438	2.98802e-05	0.00778069	ENSG00000156738	MS4A1
83.2477	0.527078	0.12644	4.16861	3.06458e-05	0.00784481	ENSG00000144218	AFF3
1915.81	0.064135	0.015467	4.14657	3.37488e-05	0.00848324	ENSG00000132612	VPS4A
1326.42	0.167459	0.0404186	4.14311	3.42632e-05	0.00848324	ENSG00000204261	PSMB8-AS1
36.6795	-0.478239	0.115772	-4.13086	3.61405e-05	0.00862443	ENSG00000061656	SPAG4
312.614	0.156753	0.0380034	4.12473	3.71177e-05	0.00862443	ENSG00000100271	TTLL1
1177.95	-0.128209	0.0310823	-4.12483	3.71007e-05	0.00862443	ENSG00000119953	SMNDC1
2365.35	-0.20069	0.0485419	-4.13438	3.55921e-05	0.00862443	ENSG00000163428	LRRC58
1552.72	-0.153985	0.0375618	-4.0995	4.14045e-05	0.00903243	ENSG00000112339	HBS1L
995.005	-0.434227	0.105918	-4.09965	4.13784e-05	0.00903243	ENSG00000137265	IRF4
495.062	-0.172559	0.0420693	-4.10178	4.09981e-05	0.00903243	ENSG00000156735	BAG4
634.593	0.147281	0.0358853	4.10422	4.05686e-05	0.00903243	ENSG00000198721	ECI2
980.964	0.31135	0.0759958	4.09694	4.18639e-05	0.00903243	ENSG00000227081	NA
2537.19	-0.173884	0.0425247	-4.08901	4.3321e-05	0.00908718	ENSG00000123728	RAP2C
328.384	-0.305578	0.074693	-4.09112	4.29288e-05	0.00908718	ENSG00000197780	TAF13
2164.93	-0.168234	0.0413861	-4.065	4.80326e-05	0.00954522	ENSG00000091140	DLD
1234.31	-0.177737	0.0436934	-4.06783	4.74529e-05	0.00954522	ENSG00000162664	ZNF326
2866.06	-0.232518	0.0571372	-4.06946	4.71213e-05	0.00954522	ENSG00000172115	CYCS
300.888	0.296784	0.0729901	4.06608	4.78104e-05	0.00954522	ENSG00000175701	MTLN
393.967	0.255469	0.0629867	4.05592	4.99366e-05	0.00963651	ENSG00000116641	DOCK7
978.563	-0.302293	0.0745715	-4.05374	5.04062e-05	0.00963651	ENSG00000197329	PELI1
672.725	-0.252121	0.0621814	-4.05461	5.02179e-05	0.00963651	ENSG00000213186	TRIM59
30.8148	-0.704319	0.17406	-4.04642	5.2008e-05	0.00981845	ENSG00000173678	SPDYE2B
442.801	-0.120047	0.0297431	-4.03612	5.43425e-05	0.00990274	ENSG00000138050	THUMPD2
33.663	-1.0565	0.261431	-4.04121	5.3176e-05	0.00990274	ENSG00000275895	LOC102724594
50.9768	-0.363951	0.0901811	-4.03578	5.44215e-05	0.00990274	ENSG00000276672	NA
83.2856	-0.706033	0.17528	-4.02803	5.62451e-05	0.0101127	ENSG00000223692	DIP2A-IT1
603.88	-0.193371	0.0480888	-4.02112	5.79209e-05	0.0102076	ENSG00000107890	ANKRD26
185.52	-0.217756	0.0541845	-4.01878	5.85001e-05	0.0102076	ENSG00000163738	MTHFD2L
2208.67	-0.151583	0.0377452	-4.01596	5.92045e-05	0.0102076	ENSG00000174695	TMEM167A
918.991	-0.153147	0.0381449	-4.01488	5.94763e-05	0.0102076	ENSG00000234545	FAM133B
2492.6	0.114344	0.0285473	4.00545	6.19005e-05	0.0105043	ENSG00000078699	CBFA2T2
2954.7	-0.237886	0.059458	-4.00092	6.30969e-05	0.0105884	ENSG00000153094	BCL2L11
375.071	-0.637824	0.159728	-3.9932	6.51886e-05	0.0108192	ENSG00000138778	CENPE
1042.69	0.245882	0.0616348	3.98933	6.6259e-05	0.0108773	ENSG00000246526	LINC02481
792.07	-0.108871	0.0273888	-3.97502	7.03735e-05	0.0108942	ENSG00000107951	MTPAP
83.6047	0.532197	0.133772	3.9784	6.93807e-05	0.0108942	ENSG00000116016	EPAS1
1192.14	-0.608824	0.152957	-3.98036	6.88096e-05	0.0108942	ENSG00000138166	DUSP5
3160.64	-0.103049	0.0259274	-3.97451	7.05254e-05	0.0108942	ENSG00000169826	CSGALNACT2
257.559	-0.33838	0.0851315	-3.9748	7.04388e-05	0.0108942	ENSG00000171943	SRGAP2C
3002.51	-0.1243	0.0312821	-3.97354	7.08129e-05	0.0108942	ENSG00000186660	ZFP91
53.1257	0.205005	0.0516187	3.97153	7.14113e-05	0.0108942	ENSG00000254703	SENCR
1139.42	-0.175505	0.0442398	-3.96713	7.27444e-05	0.0109311	ENSG00000112972	HMGCS1
42.7631	-0.28889	0.0728424	-3.96596	7.31009e-05	0.0109311	ENSG00000277534	NA
181.072	0.622561	0.157393	3.95544	7.63926e-05	0.0111321	ENSG00000012124	CD22
5134.34	0.162543	0.0411019	3.95462	7.66561e-05	0.0111321	ENSG00000122224	LY9
4173.32	0.095831	0.0242132	3.95781	7.56415e-05	0.0111321	ENSG00000160584	SIK3
1102.73	-0.248293	0.0628648	-3.94963	7.82727e-05	0.0112586	ENSG00000145780	FEM1C
361.826	-0.345887	0.0876916	-3.94436	8.00131e-05	0.0114004	ENSG00000227232	WASH7P
478.026	-0.354752	0.0900244	-3.94062	8.12709e-05	0.0114713	ENSG00000178295	GEN1
106.355	0.181749	0.046291	3.92623	8.62883e-05	0.011772	ENSG00000105072	C19orf44
1792.85	-0.124364	0.0316419	-3.93034	8.48245e-05	0.011772	ENSG00000113161	HMGCR
23.44	-0.452762	0.115209	-3.92993	8.49697e-05	0.011772	ENSG00000183742	MACC1
990.962	0.326295	0.0831201	3.92559	8.65187e-05	0.011772	ENSG00000214389	RPS3AP26
148.464	0.365238	0.0930971	3.92319	8.73834e-05	0.0117835	ENSG00000213326	RPS7P11
1436.09	-0.119874	0.0305984	-3.91766	8.94128e-05	0.0119505	ENSG00000132912	DCTN4
52.2546	-0.42168	0.107794	-3.91189	9.15753e-05	0.0121321	ENSG00000138738	PRDM5
450.138	-0.257329	0.065882	-3.90591	9.38712e-05	0.0123281	ENSG00000147996	CBWD5
3041.93	-0.150669	0.0386072	-3.90261	9.51617e-05	0.0123899	ENSG00000146676	PURB
278.484	0.177585	0.0455417	3.89939	9.6437e-05	0.0124486	ENSG00000099284	MACROH2A2
1021.25	-0.111662	0.0286572	-3.89647	9.76041e-05	0.0124925	ENSG00000071243	ING3
176.672	-0.381269	0.0979825	-3.8912	9.97503e-05	0.0126599	ENSG00000198618	PPIAP22
109.047	0.290761	0.0747975	3.88731	0.000101362	0.0127573	ENSG00000167397	VKORC1
3231.84	-0.15112	0.0390371	-3.87119	0.000108304	0.0134683	ENSG00000120705	ETF1
6333.92	-0.0876587	0.0226578	-3.86881	0.000109367	0.0134683	ENSG00000137776	SLTM
6377.97	-0.134308	0.0347219	-3.8681	0.000109687	0.0134683	ENSG00000180776	ZDHHC20
34.1962	0.467427	0.120913	3.86582	0.000110715	0.0134849	ENSG00000256338	RPL41P2
3597.13	-0.162693	0.0421943	-3.85579	0.000115355	0.0138972	ENSG00000198160	MIER1
480.577	-0.37878	0.0982682	-3.85455	0.000115941	0.0138972	ENSG00000214826	DDX12P
348.918	0.265122	0.0688397	3.8513	0.000117495	0.0139689	ENSG00000049246	PER3
41.234	-0.825317	0.214399	-3.84944	0.000118388	0.0139689	ENSG00000170425	ADORA2B
460.11	-0.185092	0.0482587	-3.83541	0.000125355	0.014375	ENSG00000136783	NIPSNAP3A
320.903	-0.449618	0.117245	-3.83486	0.000125637	0.014375	ENSG00000139618	BRCA2
556.32	-0.204311	0.0532746	-3.83505	0.000125537	0.014375	ENSG00000172785	CBWD1
12062.7	0.187206	0.0488118	3.83527	0.000125429	0.014375	ENSG00000177954	RPS27
1773.61	-0.178562	0.0466032	-3.83153	0.000127347	0.014461	ENSG00000077458	FAM76B
1388.25	-0.194592	0.0509491	-3.81933	0.000133814	0.0150821	ENSG00000180008	SOCS4
2253.67	-0.162091	0.0426306	-3.80221	0.00014341	0.0155735	ENSG00000018510	AGPS
5599.32	0.129489	0.0339921	3.80938	0.000139314	0.0155735	ENSG00000154217	PITPNC1
1252.5	-0.21001	0.0552118	-3.80371	0.000142543	0.0155735	ENSG00000164211	STARD4
15741.6	-0.201738	0.0530352	-3.80386	0.000142461	0.0155735	ENSG00000189403	HMGB1
742.119	-0.179007	0.0470814	-3.80208	0.000143488	0.0155735	ENSG00000197223	C1D
66.8242	-0.330396	0.0869332	-3.80057	0.000144361	0.0155735	ENSG00000237484	LINC01684
1548.23	0.148385	0.0390862	3.79636	0.000146838	0.0157057	ENSG00000105738	SIPA1L3
2360.05	0.142005	0.037428	3.79408	0.000148192	0.0157057	ENSG00000114779	ABHD14B
1287.34	-0.10531	0.0277628	-3.79322	0.000148706	0.0157057	ENSG00000137996	RTCA
1331.68	0.167133	0.0441159	3.78849	0.000151565	0.0158964	ENSG00000245910	SNHG6
1610.19	-0.257714	0.0680931	-3.78473	0.000153878	0.0160277	ENSG00000164305	CASP3
624.777	-0.219152	0.0579938	-3.77888	0.000157535	0.0161854	ENSG00000146263	MMS22L
148.848	0.337963	0.0893956	3.78053	0.000156494	0.0161854	ENSG00000176973	FAM89B
453.816	-0.132767	0.0351931	-3.77254	0.000161595	0.0162302	ENSG00000092978	GPATCH2
1886.81	0.111797	0.0296468	3.77097	0.000162616	0.0162302	ENSG00000103264	FBXO31
4560.02	-0.125175	0.0332897	-3.76018	0.000169792	0.0162302	ENSG00000117505	DR1
869.039	0.278338	0.0739603	3.76334	0.000167661	0.0162302	ENSG00000126243	LRFN3
868.21	0.174036	0.0461955	3.76738	0.000164973	0.0162302	ENSG00000140280	LYSMD2
169.286	0.544624	0.144294	3.77441	0.000160389	0.0162302	ENSG00000153064	BANK1
1664.98	-0.153939	0.04087	-3.76655	0.000165518	0.0162302	ENSG00000162819	BROX
10700.9	0.15533	0.0412	3.77015	0.000163146	0.0162302	ENSG00000172349	IL16
1509.23	-0.196829	0.0523259	-3.7616	0.000168833	0.0162302	ENSG00000214367	HAUS3
33.1059	-0.477805	0.126996	-3.76236	0.000168315	0.0162302	ENSG00000233822	H2BC15
212.211	0.474986	0.12624	3.76258	0.000168169	0.0162302	ENSG00000236439	NA
1265.27	0.180427	0.0480055	3.75847	0.000170954	0.0162385	ENSG00000126756	UXT
129.413	0.436567	0.116206	3.75684	0.000172073	0.0162427	ENSG00000177191	B3GNT8
17702.2	-0.13325	0.035548	-3.74845	0.000177934	0.0166624	ENSG00000170144	HNRNPA3
50.4826	0.252011	0.0672784	3.7458	0.000179822	0.0166624	ENSG00000175536	LIPT2
14739.1	0.178581	0.0476752	3.74579	0.00017983	0.0166624	ENSG00000177600	RPLP2
655.113	-0.207044	0.0556205	-3.72244	0.000197304	0.0169612	ENSG00000038210	PI4K2B
4114.27	-0.107722	0.0288802	-3.72998	0.000191496	0.0169612	ENSG00000060339	CCAR1
666.622	-0.224942	0.0604358	-3.722	0.000197654	0.0169612	ENSG00000109534	GAR1
1806.03	-0.107963	0.0289872	-3.7245	0.0001957	0.0169612	ENSG00000122376	SHLD2
2981.08	-0.138307	0.0371125	-3.7267	0.000194001	0.0169612	ENSG00000126945	HNRNPH2
76.2398	0.214308	0.0573377	3.73764	0.000185753	0.0169612	ENSG00000140104	CLBA1
1422.64	-0.134657	0.0361608	-3.72384	0.000196212	0.0169612	ENSG00000147601	TERF1
1492.72	-0.210806	0.0564632	-3.73351	0.000188831	0.0169612	ENSG00000151239	TWF1
492.084	0.177254	0.0475844	3.72504	0.000195283	0.0169612	ENSG00000161999	JMJD8
2057.53	0.1491	0.0399501	3.73217	0.000189841	0.0169612	ENSG00000168286	THAP11
26.732	-0.742026	0.1987	-3.7344	0.000188165	0.0169612	ENSG00000178445	GLDC
720.766	0.175627	0.047161	3.72399	0.000196098	0.0169612	ENSG00000180035	ZNF48
3646.33	-0.171629	0.0460872	-3.72402	0.000196079	0.0169612	ENSG00000213281	NRAS
875.557	-0.203972	0.0548533	-3.71851	0.000200401	0.0170998	ENSG00000166446	CDYL2
3324.74	-0.116429	0.0313309	-3.7161	0.000202318	0.0171663	ENSG00000196850	PPTC7
452.731	-0.103787	0.0279468	-3.71373	0.000204225	0.0172314	ENSG00000120688	WBP4
372.341	0.174546	0.0470189	3.71225	0.000205422	0.0172361	ENSG00000158828	PINK1
2665.42	0.131139	0.035342	3.71058	0.000206788	0.0172548	ENSG00000130382	MLLT1
4361.26	-0.128284	0.0346268	-3.70476	0.000211593	0.0174628	ENSG00000135655	USP15
2684.34	0.109758	0.029617	3.7059	0.000210643	0.0174628	ENSG00000162413	KLHL21
50.6877	-0.444691	0.120116	-3.70217	0.000213764	0.0175461	ENSG00000270681	NA
418.135	-0.468753	0.126794	-3.69697	0.00021819	0.0177288	ENSG00000124920	MYRF
1428.16	0.123239	0.0333368	3.6968	0.000218337	0.0177288	ENSG00000143363	PRUNE1
2363.42	-0.126912	0.0343496	-3.69473	0.000220124	0.0177783	ENSG00000138069	RAB1A
2036.69	0.127831	0.0347408	3.67958	0.000233619	0.0182974	ENSG00000051620	HEBP2
2585.22	-0.0745504	0.0202502	-3.68147	0.000231897	0.0182974	ENSG00000083520	DIS3
1354.06	-0.131435	0.0356978	-3.68189	0.000231511	0.0182974	ENSG00000109133	TMEM33
175.123	-1.00084	0.271566	-3.68543	0.000228321	0.0182974	ENSG00000109321	AREG
110.187	0.338177	0.0919118	3.67936	0.000233821	0.0182974	ENSG00000185641	NA
42.7956	0.29247	0.0794648	3.6805	0.00023278	0.0182974	ENSG00000256633	PDE2A-AS2
2136.38	-0.106248	0.0289229	-3.6735	0.000239247	0.0184868	ENSG00000113163	CERT1
325.674	0.210582	0.0573559	3.67149	0.000241137	0.0184868	ENSG00000141696	P3H4
142.502	0.487703	0.132786	3.67284	0.00023987	0.0184868	ENSG00000167483	NIBAN3
129.654	-0.272317	0.0741585	-3.67209	0.00024057	0.0184868	ENSG00000234743	EIF5AP4
1519.28	0.345839	0.0942415	3.66971	0.000242828	0.0185224	ENSG00000008256	CYTH3
2774.66	-0.0953464	0.0260183	-3.66459	0.000247737	0.018526	ENSG00000113649	TCERG1
4409.05	0.166057	0.0453284	3.66342	0.000248866	0.018526	ENSG00000121104	FAM117A
1372.35	-0.28947	0.0791384	-3.65777	0.000254416	0.018526	ENSG00000125148	MT2A
1905.1	0.140126	0.038323	3.65645	0.000255729	0.018526	ENSG00000148296	SURF6
388.385	-0.242621	0.0662609	-3.6616	0.000250647	0.018526	ENSG00000155330	C16orf87
1134.67	-0.265306	0.0725838	-3.65517	0.00025701	0.018526	ENSG00000165997	ARL5B
571.269	-0.496377	0.135762	-3.65623	0.000255949	0.018526	ENSG00000185022	MAFF
78.1107	0.247423	0.067508	3.66509	0.000247254	0.018526	ENSG00000205918	PDPK2P
272.732	0.216949	0.0591645	3.66689	0.000245523	0.018526	ENSG00000214530	STARD10
54.4942	-0.511921	0.139923	-3.65859	0.000253607	0.018526	ENSG00000228049	POLR2J2
35.2895	0.390047	0.106699	3.65558	0.000256598	0.018526	ENSG00000267472	ARHGAP27P2
41.1617	0.614482	0.16814	3.65459	0.000257596	0.018526	ENSG00000269404	SPIB
296.013	-0.227316	0.0623116	-3.64806	0.000264232	0.018715	ENSG00000118495	PLAGL1
32260.6	-0.106041	0.0290764	-3.64697	0.000265356	0.018715	ENSG00000122566	HNRNPA2B1
41.8997	0.359685	0.0985977	3.64801	0.000264279	0.018715	ENSG00000129038	LOXL1
252.461	-0.31505	0.0863121	-3.65012	0.00026212	0.018715	ENSG00000138346	DNA2
754.772	-0.123051	0.0337502	-3.64594	0.000266418	0.018715	ENSG00000176102	CSTF3
2104.39	-0.0912735	0.0250627	-3.6418	0.000270735	0.0189302	ENSG00000138434	ITPRID2
33.1631	-0.280738	0.077153	-3.63872	0.000273997	0.0190699	ENSG00000280987	MATR3
328.159	0.19433	0.0534327	3.63691	0.000275929	0.0191163	ENSG00000181007	ZFP82
1066.17	-0.184503	0.0507548	-3.63519	0.000277779	0.0191566	ENSG00000122591	FAM126A
3164.35	-0.212771	0.0585582	-3.63349	0.000279614	0.0191955	ENSG00000072274	TFRC
2943.04	-0.151959	0.041853	-3.63079	0.000282554	0.0193096	ENSG00000168175	MAPK1IP1L
2385.18	-0.215511	0.0594048	-3.62784	0.000285798	0.0193561	ENSG00000067064	IDI1
1181.23	0.270838	0.0746506	3.62808	0.00028554	0.0193561	ENSG00000120896	SORBS3
29.5421	0.579676	0.160023	3.62247	0.000291806	0.019452	ENSG00000095585	BLNK
9921.67	0.127819	0.0353231	3.61858	0.000296229	0.019452	ENSG00000099875	MKNK2
1301.5	0.143018	0.0395186	3.61901	0.000295735	0.019452	ENSG00000119559	C19orf25
709.158	-0.118801	0.0328194	-3.61983	0.000294797	0.019452	ENSG00000136940	PDCL
4139.73	-0.0985028	0.0271852	-3.6234	0.000290757	0.019452	ENSG00000169217	CD2BP2
13134.8	0.112793	0.0311302	3.62327	0.000290907	0.019452	ENSG00000175215	CTDSP2
312.038	0.199505	0.0551222	3.61933	0.000295369	0.019452	ENSG00000176182	MYPOP
3610.47	-0.0953051	0.0263601	-3.61551	0.00029976	0.0195986	ENSG00000055044	NOP58
2147.6	-0.102066	0.0282508	-3.61287	0.000302832	0.0196295	ENSG00000144744	UBA3
2293.3	0.115328	0.0319184	3.61319	0.000302449	0.0196295	ENSG00000178234	GALNT11
7200.63	-0.163391	0.045296	-3.60719	0.000309529	0.0199778	ENSG00000082153	BZW1
1527.31	0.223973	0.0621116	3.60597	0.000310984	0.0199863	ENSG00000170604	IRF2BP1
1336.17	-0.166961	0.0463306	-3.60368	0.000313748	0.0200233	ENSG00000043093	DCUN1D1
8343.44	0.112136	0.0312133	3.59256	0.000327441	0.0200233	ENSG00000100422	CERK
56.8077	0.780257	0.217121	3.59365	0.000326076	0.0200233	ENSG00000100721	TCL1A
6778.23	0.13859	0.0385748	3.59275	0.000327205	0.0200233	ENSG00000117091	CD48
887.678	-0.201038	0.0558842	-3.5974	0.000321412	0.0200233	ENSG00000148943	LIN7C
6679.46	-0.0978144	0.027209	-3.59492	0.000324489	0.0200233	ENSG00000162613	FUBP1
298.968	0.174316	0.0484488	3.59795	0.000320739	0.0200233	ENSG00000167536	DHRS13
1529.59	0.158732	0.0442006	3.59117	0.000329203	0.0200233	ENSG00000187091	PLCD1
21904.3	0.143708	0.0400251	3.59044	0.00033012	0.0200233	ENSG00000198695	ND6
162.142	-0.410491	0.114257	-3.59269	0.000327288	0.0200233	ENSG00000211724	TRBV6-6
416.913	0.104736	0.0291702	3.59052	0.000330023	0.0200233	ENSG00000214941	ZSWIM7
53.2395	0.234441	0.0651442	3.5988	0.000319694	0.0200233	ENSG00000254531	FLJ20021
43.5396	-0.581929	0.162051	-3.59103	0.000329377	0.0200233	ENSG00000265415	NA
239.101	-0.239322	0.066568	-3.59514	0.000324211	0.0200233	ENSG00000275764	NA
607.97	-0.18167	0.0506814	-3.58454	0.000337668	0.0203297	ENSG00000152944	MED21
118.681	-0.457013	0.127501	-3.58439	0.000337863	0.0203297	ENSG00000272211	NA
2189.61	-0.170834	0.047711	-3.5806	0.000342804	0.0205451	ENSG00000173598	NUDT4
1132.8	-0.0993382	0.027784	-3.57537	0.00034973	0.0206327	ENSG00000111877	MCM9
739.314	0.113222	0.0316587	3.57632	0.000348467	0.0206327	ENSG00000119431	HDHD3
5680.25	0.168316	0.047066	3.57616	0.00034868	0.0206327	ENSG00000171858	RPS21
894.143	-0.323426	0.0904315	-3.57647	0.000348263	0.0206327	ENSG00000172965	MIR4435-2HG
5460.16	-0.210802	0.059046	-3.57013	0.000356803	0.0209681	ENSG00000143401	ANP32E
1298.54	0.195437	0.0548183	3.56517	0.000363622	0.021286	ENSG00000244398	NA
2709.65	-0.315401	0.0884982	-3.56392	0.000365356	0.0213049	ENSG00000113810	SMC4
1450.34	0.217937	0.0611778	3.56236	0.000367539	0.0213497	ENSG00000167775	CD320
1204.54	-0.133143	0.0373963	-3.56034	0.000370382	0.0213595	ENSG00000087053	MTMR2
85.0658	-0.328635	0.0923074	-3.56023	0.000370535	0.0213595	ENSG00000115641	FHL2
5746.97	-0.102265	0.0288339	-3.54671	0.000390081	0.0221538	ENSG00000109606	DHX15
695.137	-0.164697	0.0464327	-3.54699	0.000389656	0.0221538	ENSG00000115750	TAF1B
413.934	0.408852	0.115303	3.5459	0.000391276	0.0221538	ENSG00000136149	RPL13AP25
914.815	-0.136484	0.0384637	-3.54839	0.000387598	0.0221538	ENSG00000161654	LSM12
8182.73	0.201168	0.0567367	3.54565	0.000391648	0.0221538	ENSG00000198840	ND3
98.8208	-0.230784	0.0651242	-3.54376	0.000394472	0.0222302	ENSG00000204745	LOC102724642
85.4685	-0.651716	0.183979	-3.54235	0.000396585	0.0222663	ENSG00000156463	SH3RF2
42.6397	-0.253259	0.0715206	-3.54106	0.000398525	0.0222923	ENSG00000001630	CYP51A1
1841.05	0.074416	0.0210293	3.53869	0.000402121	0.022328	ENSG00000141084	RANBP10
481.613	0.175419	0.0495666	3.53906	0.000401558	0.022328	ENSG00000169951	ZNF764
1829.79	0.175314	0.0495902	3.53524	0.0004074	0.0223708	ENSG00000144749	LRIG1
6259.32	-0.092922	0.0262936	-3.53402	0.000409292	0.0223708	ENSG00000163714	U2SURP
1419.59	-0.0923202	0.0261281	-3.53337	0.000410297	0.0223708	ENSG00000166266	CUL5
92.979	-0.728766	0.206129	-3.53549	0.000407027	0.0223708	ENSG00000166803	PCLAF
377.535	0.167997	0.0474997	3.5368	0.000405007	0.0223708	ENSG00000248487	ABHD14A
36.1999	0.204774	0.0579713	3.53234	0.000411899	0.0223774	ENSG00000282034	NA
2020.85	-0.150256	0.042558	-3.53063	0.000414579	0.0224422	ENSG00000116750	UCHL5
1939.87	0.226278	0.0641464	3.52753	0.000419459	0.0226253	ENSG00000115604	IL18R1
3528.08	-0.0964914	0.0273685	-3.52564	0.000422455	0.022626	ENSG00000111011	RSRC2
1343.45	-0.105759	0.0300033	-3.52493	0.000423602	0.022626	ENSG00000126653	NSRP1
2351.7	-0.149179	0.0423238	-3.5247	0.000423967	0.022626	ENSG00000166200	COPS2
9222.13	0.136948	0.038876	3.52268	0.000427208	0.0227187	ENSG00000174282	ZBTB4
544.739	-0.719656	0.204436	-3.52021	0.000431211	0.0228512	ENSG00000066279	ASPM
1220.01	-0.165785	0.0471381	-3.517	0.000436448	0.0229864	ENSG00000151233	GXYLT1
99.0712	-0.187933	0.0534388	-3.51679	0.000436807	0.0229864	ENSG00000236675	MTX1P1
10282.4	-0.133595	0.0380194	-3.51386	0.00044164	0.0231478	ENSG00000114978	MOB1A
362.107	-0.489697	0.139392	-3.51308	0.000442939	0.0231478	ENSG00000164687	FABP5
629.022	0.0930075	0.0265107	3.50831	0.000450971	0.0234863	ENSG00000155275	TRMT44
19545	0.125835	0.0358919	3.50594	0.000454998	0.0235337	ENSG00000103479	RBL2
69.1411	0.663871	0.189326	3.5065	0.00045404	0.0235337	ENSG00000166428	PLD4
131.194	0.383658	0.10947	3.50467	0.00045717	0.0235653	ENSG00000225556	C2CD4D
344.512	-0.691125	0.197625	-3.49715	0.00047025	0.0239046	ENSG00000092853	CLSPN
41.5355	0.295871	0.0846229	3.49635	0.000471665	0.0239046	ENSG00000118804	STBD1
222.812	0.354911	0.101469	3.49774	0.000469224	0.0239046	ENSG00000159640	ACE
326.192	-0.301708	0.0862854	-3.49663	0.000471179	0.0239046	ENSG00000166839	ANKDD1A
36.1166	-0.513105	0.146728	-3.49699	0.000470537	0.0239046	ENSG00000207721	MIR186
135.574	0.227742	0.0651925	3.49337	0.000476968	0.0240924	ENSG00000068001	HYAL2
1310.46	0.290034	0.083059	3.49191	0.000479585	0.0241439	ENSG00000067141	NEO1
1570.21	-0.0970547	0.0278092	-3.49003	0.000482972	0.0242336	ENSG00000151893	CACUL1
2561.97	-0.108747	0.0311914	-3.48643	0.000489509	0.0242428	ENSG00000156875	MFSD14A
6767.47	0.154902	0.0444408	3.48559	0.000491057	0.0242428	ENSG00000182774	RPS17
10658.7	-0.186325	0.0534337	-3.48703	0.000488413	0.0242428	ENSG00000198830	HMGN2
1009.23	-0.232547	0.0666621	-3.48843	0.000485857	0.0242428	ENSG00000233369	GTF2IP4
45.2318	0.218323	0.062637	3.48552	0.00049118	0.0242428	ENSG00000248971	KRT8P46
2123.07	-0.0895424	0.0257	-3.48414	0.000493723	0.0242789	ENSG00000165525	NEMF
353.831	0.168063	0.0482471	3.48338	0.000495127	0.0242789	ENSG00000174684	B4GAT1
1981.41	-0.156611	0.044981	-3.48171	0.000498221	0.0243515	ENSG00000120992	LYPLA1
118.42	-0.50115	0.143993	-3.48039	0.000500691	0.0243596	ENSG00000196584	XRCC2
1186.76	-0.351393	0.100978	-3.47989	0.00050161	0.0243596	ENSG00000235655	H3P6
1470.34	-0.146363	0.042086	-3.47771	0.000505709	0.024472	ENSG00000132603	NIP7
31.0889	-0.301317	0.0866616	-3.47694	0.000507167	0.024472	ENSG00000252817	NA
3621.99	0.0703806	0.0202534	3.475	0.00051085	0.02456	ENSG00000089094	KDM2B
11629	-0.115752	0.033317	-3.47427	0.000512242	0.02456	ENSG00000138668	HNRNPD
74.0403	0.265654	0.0765911	3.46847	0.000523431	0.0246273	ENSG00000105258	POLR2I
10623.6	0.111214	0.0320607	3.46885	0.000522696	0.0246273	ENSG00000122359	ANXA11
93.5454	0.259461	0.0747927	3.46907	0.000522261	0.0246273	ENSG00000168734	PKIG
336.368	0.154706	0.0445678	3.47125	0.000518051	0.0246273	ENSG00000170545	SMAGP
445.305	-0.240521	0.0693293	-3.46926	0.000521895	0.0246273	ENSG00000176208	ATAD5
15501.2	0.170873	0.0492351	3.47056	0.000519375	0.0246273	ENSG00000213445	SIPA1
1866.64	0.103394	0.0298178	3.46753	0.000525268	0.024637	ENSG00000141569	TRIM65
18013.4	0.135696	0.0391855	3.46292	0.000534354	0.0248318	ENSG00000008988	RPS20
632.665	0.241136	0.0696284	3.46318	0.000533839	0.0248318	ENSG00000111678	C12orf57
1016.27	-0.122415	0.0353355	-3.46436	0.000531486	0.0248318	ENSG00000121350	PYROXD1
1366.15	0.116724	0.0337459	3.4589	0.000542381	0.0251276	ENSG00000106608	URGCP
97.5404	-0.26851	0.0776604	-3.45749	0.000545238	0.0251827	ENSG00000281398	SNHG4
220.823	-0.157079	0.0454539	-3.45578	0.000548702	0.0251886	ENSG00000172167	MTBP
401.316	-0.208334	0.0602778	-3.45624	0.00054777	0.0251886	ENSG00000197121	PGAP1
2344.01	-0.085624	0.024797	-3.45299	0.0005544	0.0251902	ENSG00000017260	ATP2C1
39675.7	0.0963629	0.0279119	3.4524	0.000555633	0.0251902	ENSG00000106948	AKNA
1139.15	-0.155385	0.0449999	-3.45301	0.000554373	0.0251902	ENSG00000134375	TIMM17A
11319.9	0.104969	0.0304055	3.4523	0.000555826	0.0251902	ENSG00000198286	CARD11
399.304	0.47955	0.138932	3.4517	0.000557077	0.0251902	ENSG00000198756	COLGALT2
2203.34	-0.182976	0.0530594	-3.44852	0.000563665	0.025412	ENSG00000116747	RO60
380.969	-0.425767	0.123512	-3.44717	0.000566486	0.0254632	ENSG00000186648	CARMIL3
1317.35	-0.0770278	0.0223756	-3.44249	0.000576386	0.0256938	ENSG00000105821	DNAJC2
355.396	-0.180533	0.0524438	-3.44241	0.000576565	0.0256938	ENSG00000119640	ACYP1
162.207	0.221581	0.0643695	3.44233	0.000576721	0.0256938	ENSG00000242732	RTL5
192.454	-0.641665	0.186469	-3.44114	0.000579273	0.0257316	ENSG00000029993	HMGB3
183.141	-0.565627	0.16465	-3.43534	0.000591821	0.0258578	ENSG00000010030	ETV7
2557	-0.138359	0.0402688	-3.43589	0.000590614	0.0258578	ENSG00000101166	PRELID3B
9307.33	0.174445	0.0507455	3.43764	0.000586802	0.0258578	ENSG00000110448	CD5
1241.89	-0.245837	0.0715041	-3.43808	0.000585861	0.0258578	ENSG00000134970	TMED7
102.402	-0.808681	0.23541	-3.4352	0.000592121	0.0258578	ENSG00000225972	MTND1P23
544.237	0.256792	0.0747557	3.43508	0.000592386	0.0258578	ENSG00000242071	RPL7AP6
1617.95	0.294462	0.0858182	3.43123	0.000600843	0.0260015	ENSG00000131634	TMEM204
702.956	0.153452	0.0447024	3.43275	0.000597501	0.0260015	ENSG00000145919	BOD1
347.544	-0.410219	0.119554	-3.43124	0.000600829	0.0260015	ENSG00000168255	POLR2J3
359.651	0.198667	0.0579191	3.43008	0.000603405	0.0260378	ENSG00000261801	LOXL1-AS1
557.603	-0.094004	0.0274236	-3.42785	0.000608383	0.0261778	ENSG00000144306	SCRN3
505.607	0.387471	0.113062	3.42706	0.000610158	0.0261796	ENSG00000100311	PDGFB
597.688	0.221642	0.0647729	3.42183	0.000622008	0.0265372	ENSG00000213145	CRIP1
85.5732	-0.200128	0.0584757	-3.42242	0.000620675	0.0265372	ENSG00000235919	ASH1L-AS1
522.061	-0.14565	0.0426809	-3.41253	0.000643619	0.0266378	ENSG00000052802	MSMO1
30238.9	0.118622	0.034763	3.41231	0.000644147	0.0266378	ENSG00000100242	SUN2
2477.68	-0.126959	0.0371688	-3.41573	0.000636108	0.0266378	ENSG00000100567	PSMA3
8472.97	0.134546	0.0393963	3.41518	0.000637389	0.0266378	ENSG00000108819	PPP1R9B
183.649	-0.775378	0.22701	-3.41561	0.000636384	0.0266378	ENSG00000118193	KIF14
381.541	0.271802	0.0796328	3.41319	0.000642082	0.0266378	ENSG00000128011	LRFN1
574.722	0.148094	0.0433698	3.41468	0.000638572	0.0266378	ENSG00000133619	KRBA1
1036.04	-0.224195	0.0657374	-3.41046	0.000648534	0.0266378	ENSG00000138182	KIF20B
4656.74	-0.121878	0.0357472	-3.40944	0.000650957	0.0266378	ENSG00000161547	SRSF2
2149.67	-0.143969	0.0421282	-3.41741	0.00063219	0.0266378	ENSG00000164134	NAA15
710.539	-0.116652	0.0342285	-3.40803	0.000654348	0.0266378	ENSG00000166411	IDH3A
504.297	-0.149238	0.0437635	-3.41011	0.000649374	0.0266378	ENSG00000166575	TMEM135
3932.5	0.0826206	0.0241813	3.41672	0.000633808	0.0266378	ENSG00000166716	ZNF592
5683.74	-0.189347	0.0555582	-3.40808	0.000654224	0.0266378	ENSG00000171314	PGAM1
178.39	0.23574	0.0690943	3.41186	0.000645221	0.0266378	ENSG00000174276	ZNHIT2
4305.57	-0.100666	0.0295186	-3.41026	0.00064902	0.0266378	ENSG00000198887	SMC5
2105.24	0.0763299	0.0223837	3.41007	0.000649471	0.0266378	ENSG00000198917	SPOUT1
2765.17	-0.116989	0.0343517	-3.40563	0.00066011	0.0266448	ENSG00000104331	BPNT2
1026.35	-0.606416	0.178099	-3.40494	0.00066178	0.0266448	ENSG00000117724	CENPF
204.058	-0.47464	0.139424	-3.4043	0.000663342	0.0266448	ENSG00000143228	NUF2
1424.87	-0.142454	0.0418387	-3.40483	0.000662057	0.0266448	ENSG00000153006	SREK1IP1
9963.52	-0.261664	0.076862	-3.40434	0.000663245	0.0266448	ENSG00000160305	DIP2A
645.513	0.120916	0.0355407	3.40217	0.000668519	0.0267815	ENSG00000147144	CCDC120
409.043	-0.186759	0.0549076	-3.40134	0.000670573	0.0267927	ENSG00000183605	SFXN4
1041.62	0.109594	0.0322308	3.40028	0.000673159	0.0268251	ENSG00000119977	TCTN3
11880.1	0.145324	0.0427751	3.3974	0.000680302	0.0268969	ENSG00000136942	RPL35
412.673	-0.139734	0.0411136	-3.39873	0.000676985	0.0268969	ENSG00000151470	C4orf33
1205.56	-0.117531	0.0345896	-3.39786	0.000679144	0.0268969	ENSG00000213516	RBMXL1
34.0793	-0.179364	0.0528367	-3.39469	0.000687051	0.0270928	ENSG00000225377	NRSN2-AS1
4892.69	-0.0691193	0.0203726	-3.39276	0.000691916	0.0272136	ENSG00000110075	PPP6R3
6257.8	0.309289	0.0912174	3.39068	0.000697192	0.0273499	ENSG00000142173	COL6A2
1476.3	-0.113926	0.0336157	-3.38908	0.000701275	0.0274387	ENSG00000135776	ABCB10
682.13	0.228685	0.067497	3.38808	0.000703845	0.0274682	ENSG00000224631	RPS27AP16
699.169	-0.117471	0.0346827	-3.38703	0.000706547	0.0275025	ENSG00000112031	MTRF1L
4839.87	0.138595	0.0409625	3.38346	0.000715785	0.0277905	ENSG00000169220	RGS14
1836.05	-0.14734	0.0436031	-3.3791	0.000727223	0.0281622	ENSG00000129534	MIS18BP1
3225.03	-0.0988397	0.0292807	-3.37559	0.000736587	0.0282074	ENSG00000005700	IBTK
4190.22	0.0820323	0.0243097	3.37446	0.000739598	0.0282074	ENSG00000114650	SCAP
621.017	-0.250387	0.074176	-3.37558	0.000736611	0.0282074	ENSG00000172292	CERS6
5037.4	0.152729	0.0452268	3.37695	0.000732934	0.0282074	ENSG00000213741	RPS29
61.9872	0.446169	0.132214	3.37461	0.000739213	0.0282074	ENSG00000229638	RPL4P4
28.7525	0.420616	0.124541	3.37732	0.000731948	0.0282074	ENSG00000246228	CASC8
2090.98	-0.1597	0.0473362	-3.37373	0.000741569	0.0282114	ENSG00000176853	FAM91A1
5851.42	-0.119116	0.0353334	-3.3712	0.000748426	0.0283557	ENSG00000058272	PPP1R12A
3000.73	-0.0936128	0.0277757	-3.37031	0.000750832	0.0283557	ENSG00000065548	ZC3H15
29964	0.116024	0.0344258	3.37025	0.000750996	0.0283557	ENSG00000110324	IL10RA
1591.96	-0.101753	0.0302003	-3.36927	0.000753679	0.0283861	ENSG00000125877	ITPA
2430.62	-0.175323	0.0520576	-3.36787	0.000757524	0.0284599	ENSG00000139921	TMX1
1104.87	-0.101518	0.0301706	-3.36481	0.00076597	0.0287058	ENSG00000040341	STAU2
25.2711	0.322215	0.0958431	3.3619	0.000774074	0.0289377	ENSG00000205871	RPS3AP47
1942.22	0.141482	0.0421004	3.36059	0.000777755	0.0289748	ENSG00000106351	AGFG2
2374.75	0.12633	0.0375961	3.36019	0.000778902	0.0289748	ENSG00000120913	PDLIM2
1236.38	-0.110541	0.032955	-3.35431	0.00079563	0.0290441	ENSG00000035141	FAM136A
389.391	0.184958	0.0551476	3.35387	0.000796892	0.0290441	ENSG00000079435	LIPE
1437.89	-0.146571	0.0437073	-3.35346	0.000798074	0.0290441	ENSG00000100764	PSMC1
751.931	-0.216322	0.0644701	-3.35539	0.000792527	0.0290441	ENSG00000136603	SKIL
1639.75	-0.0878696	0.0261817	-3.35615	0.000790361	0.0290441	ENSG00000151532	VTI1A
3332.37	0.158042	0.0470743	3.35728	0.000787121	0.0290441	ENSG00000160570	DEDD2
309.483	0.0994441	0.0296292	3.35629	0.000789969	0.0290441	ENSG00000164414	SLC35A1
3237.07	-0.0927993	0.0276538	-3.35575	0.000791508	0.0290441	ENSG00000166847	DCTN5
41.7362	0.204309	0.0608351	3.35841	0.000783914	0.0290441	ENSG00000230069	LRRC37A15P
1087.59	0.178785	0.0533318	3.35231	0.00080139	0.0290947	ENSG00000176022	B3GALT6
75.6228	0.92494	0.275982	3.35145	0.000803888	0.0291154	ENSG00000196549	MME
6911.76	-0.280429	0.0837279	-3.34929	0.000810187	0.0292733	ENSG00000164104	HMGB2
1240.46	-0.109635	0.0327423	-3.34841	0.00081276	0.0292962	ENSG00000197170	PSMD12
3068.69	-0.105372	0.0314942	-3.34577	0.000820554	0.0295067	ENSG00000172795	DCP2
479.569	-0.108875	0.0325552	-3.34432	0.000824834	0.0295201	ENSG00000069943	PIGB
7397.96	0.142458	0.0425968	3.34434	0.000824798	0.0295201	ENSG00000110651	CD81
4562.14	0.175646	0.0525386	3.34319	0.000828217	0.0295711	ENSG00000134419	RPS15A
1958.83	0.0904727	0.0270676	3.34248	0.000830348	0.0295772	ENSG00000148297	MED22
1055.14	0.166803	0.0499182	3.34152	0.000833205	0.0296092	ENSG00000114554	PLXNA1
1482.22	0.0929708	0.0278608	3.33698	0.000846948	0.0296368	ENSG00000015532	XYLT2
792.637	0.193956	0.0581096	3.33776	0.000844577	0.0296368	ENSG00000099385	BCL7C
324.363	0.13096	0.0392265	3.33856	0.000842131	0.0296368	ENSG00000167740	CYB5D2
2615.17	0.216035	0.0647446	3.33672	0.00084772	0.0296368	ENSG00000178464	RPL10P16
132.686	0.322742	0.0966917	3.33785	0.000844296	0.0296368	ENSG00000198816	ZNF358
591.284	-0.186194	0.0557464	-3.34002	0.000837731	0.0296368	ENSG00000204899	MZT1
28.7301	-0.264444	0.0791767	-3.33993	0.000838006	0.0296368	ENSG00000230797	YY2
907.966	-0.183869	0.0551475	-3.33413	0.000855674	0.0296604	ENSG00000006634	DBF4
4058.22	-0.175322	0.0525717	-3.33491	0.000853268	0.0296604	ENSG00000034677	RNF19A
45.5597	-0.617239	0.18506	-3.33535	0.000851928	0.0296604	ENSG00000163009	NA
44.7029	-0.514793	0.15441	-3.33394	0.00085625	0.0296604	ENSG00000251229	NA
1396.29	0.168182	0.050489	3.33107	0.000865125	0.0298993	ENSG00000175573	C11orf68
145.398	-0.240376	0.072185	-3.32999	0.000868489	0.029947	ENSG00000185261	KIAA0825
240.302	-0.269071	0.0808273	-3.32896	0.000871715	0.0299842	ENSG00000196873	CBWD3
1623.91	-0.337859	0.101528	-3.32774	0.000875522	0.0299842	ENSG00000228716	DHFR
29.1217	-0.46452	0.13959	-3.32775	0.000875508	0.0299842	ENSG00000266017	MIR4477B
1814.82	-0.136254	0.0409706	-3.32567	0.000882075	0.0300045	ENSG00000078177	N4BP2
1558.82	0.113017	0.0339795	3.32603	0.000880937	0.0300045	ENSG00000090581	GNPTG
362.228	-0.61656	0.185385	-3.32583	0.000881557	0.0300045	ENSG00000137812	KNL1
1075.5	0.16001	0.0481305	3.3245	0.000885783	0.0300629	ENSG00000186222	BLOC1S4
611.226	-0.10916	0.0329024	-3.31769	0.000907653	0.0304588	ENSG00000060749	QSER1
1333.11	-0.125003	0.0376694	-3.31843	0.000905256	0.0304588	ENSG00000162636	FAM102B
41.7296	-0.313744	0.0944976	-3.32012	0.000899775	0.0304588	ENSG00000163806	SPDYA
2823.4	0.0801114	0.0241486	3.31744	0.000908467	0.0304588	ENSG00000166619	BLCAP
5572.84	-0.123124	0.0371178	-3.31711	0.000909549	0.0304588	ENSG00000188529	SRSF10
69.3966	-0.3299	0.0994387	-3.31763	0.000907856	0.0304588	ENSG00000253669	GASAL1
937.249	0.114952	0.0347041	3.31235	0.000925146	0.0308443	ENSG00000174996	KLC2
7429.25	0.136003	0.0410591	3.31238	0.000925071	0.0308443	ENSG00000198918	RPL39
308.006	-0.519771	0.157013	-3.31037	0.000931731	0.0309832	ENSG00000151725	CENPU
73.3599	-0.721102	0.217865	-3.30986	0.000933414	0.0309832	ENSG00000179750	APOBEC3B
1766.71	-0.138403	0.0418599	-3.30634	0.00094524	0.0313069	ENSG00000131263	RLIM
341.768	-0.479638	0.145195	-3.3034	0.000955209	0.031367	ENSG00000068489	PRR11
1993.59	0.0779067	0.0235757	3.30454	0.000951336	0.031367	ENSG00000107021	TBC1D13
311.946	-0.163047	0.0493377	-3.30472	0.000950707	0.031367	ENSG00000138336	TET1
1933.05	-0.125825	0.0380902	-3.30335	0.000955361	0.031367	ENSG00000163257	DCAF16
26388.5	-0.144103	0.0436369	-3.30233	0.000958868	0.0314138	ENSG00000138071	ACTR2
2343.62	0.112972	0.0342438	3.29904	0.000970163	0.0317087	ENSG00000167395	ZNF646
718.227	0.15333	0.046485	3.29849	0.000972067	0.0317087	ENSG00000215845	TSTD1
5675.41	0.1281	0.0388478	3.2975	0.000975513	0.0317525	ENSG00000198242	RPL23A
212.445	-0.58443	0.177307	-3.29615	0.000980208	0.0318367	ENSG00000051341	POLQ
1807.55	-0.099863	0.0303057	-3.29518	0.00098357	0.0318774	ENSG00000147874	HAUS6
2606.16	-0.157084	0.0477421	-3.29026	0.00100096	0.0320658	ENSG00000102753	KPNA3
904.917	0.167265	0.0508405	3.28999	0.00100192	0.0320658	ENSG00000125901	MRPS26
11587.5	-0.11742	0.0356856	-3.29041	0.00100042	0.0320658	ENSG00000135535	CD164
1643.88	0.177194	0.0538596	3.28993	0.00100212	0.0320658	ENSG00000164086	DUSP7
1583.79	0.142884	0.0434195	3.29078	0.000999087	0.0320658	ENSG00000171823	FBXL14
260.727	0.0905989	0.027522	3.29187	0.000995245	0.0320658	ENSG00000249471	ZNF324B
894.057	0.122404	0.0372263	3.2881	0.00100866	0.0322068	ENSG00000019485	PRDM11
2137.94	0.201345	0.0612655	3.28643	0.00101465	0.0323003	ENSG00000008283	CYB561
215.544	0.359558	0.109433	3.28564	0.0010175	0.0323003	ENSG00000135144	DTX1
1071.2	0.120277	0.0366084	3.2855	0.00101801	0.0323003	ENSG00000184436	THAP7
4185.38	0.138575	0.0421869	3.28479	0.00102059	0.0323145	ENSG00000166949	SMAD3
4394.74	-0.176128	0.0536369	-3.28371	0.00102451	0.0323707	ENSG00000213639	PPP1CB
2852.68	0.107174	0.0326477	3.28274	0.00102803	0.0324141	ENSG00000204713	TRIM27
764.284	0.156505	0.0476835	3.28215	0.00103018	0.0324142	ENSG00000140691	ARMC5
2594.01	0.0802895	0.0244695	3.28121	0.00103363	0.0324552	ENSG00000162298	SYVN1
5571.65	0.120528	0.0367477	3.27987	0.00103856	0.0325422	ENSG00000140368	PSTPIP1
586.084	0.150769	0.0459865	3.27856	0.00104339	0.0325586	ENSG00000127540	UQCR11
2708.59	-0.0591306	0.0180328	-3.27906	0.00104154	0.0325586	ENSG00000148358	GPR107
2727.3	0.109141	0.033313	3.27623	0.00105204	0.0326441	ENSG00000127663	KDM4B
7867.87	0.166759	0.05092	3.27491	0.00105694	0.0326441	ENSG00000130255	RPL36
131.109	0.451224	0.137716	3.27647	0.00105114	0.0326441	ENSG00000163534	FCRL1
60.8691	-0.495295	0.151231	-3.27509	0.00105628	0.0326441	ENSG00000188886	ASTL
381.332	-0.182077	0.0555891	-3.27541	0.0010551	0.0326441	ENSG00000205208	C4orf46
1045.5	-0.0931767	0.0284568	-3.27432	0.00105917	0.0326462	ENSG00000218739	CEBPZOS
3559.35	-0.0549884	0.0168035	-3.27243	0.00106626	0.032733	ENSG00000090686	USP48
90.2889	-0.692724	0.211686	-3.27242	0.00106632	0.032733	ENSG00000165891	E2F7
471.511	-0.102237	0.0312511	-3.27147	0.00106991	0.0327764	ENSG00000145414	NAF1
1252.99	-0.0882841	0.0270063	-3.26901	0.00107923	0.0328273	ENSG00000151694	ADAM17
302.659	-0.273776	0.0837173	-3.27025	0.00107453	0.0328273	ENSG00000185386	MAPK11
2424.4	0.115611	0.0353808	3.26761	0.00108461	0.0328273	ENSG00000204569	PPP1R10
25.1377	0.288392	0.0882531	3.26779	0.00108391	0.0328273	ENSG00000241990	PRR34-AS1
77.0902	0.390701	0.119511	3.26915	0.0010787	0.0328273	ENSG00000250182	EEF1A1P13
34.97	-0.252109	0.0771408	-3.26816	0.0010825	0.0328273	ENSG00000251131	NA
1541.39	-0.120766	0.0370047	-3.26354	0.00110031	0.0329916	ENSG00000139372	TDG
367.184	-0.132804	0.0406761	-3.26492	0.00109493	0.0329916	ENSG00000156500	PABIR3
1576	0.118312	0.0362359	3.26504	0.00109447	0.0329916	ENSG00000187713	TMEM203
82.2744	0.346569	0.1062	3.26337	0.00110096	0.0329916	ENSG00000227063	RPL41P1
22.8103	0.66996	0.205239	3.26429	0.00109739	0.0329916	ENSG00000241741	RPL7AP30
2308.13	0.0746096	0.0228693	3.26243	0.00110463	0.033036	ENSG00000115568	ZNF142
6596.34	-0.089649	0.0274973	-3.26028	0.00111301	0.0332209	ENSG00000144224	UBXN4
1206.64	-0.37131	0.113928	-3.25918	0.00111735	0.0332846	ENSG00000106462	EZH2
2869.1	-0.107276	0.0329377	-3.25695	0.00112616	0.0334811	ENSG00000120948	TARDBP
130.664	-0.139255	0.0427724	-3.25572	0.00113107	0.0335452	ENSG00000167720	SRR
667.963	0.135515	0.0416293	3.25529	0.00113276	0.0335452	ENSG00000182134	TDRKH
8533.53	-0.151599	0.046626	-3.25138	0.00114844	0.0338768	ENSG00000069275	NUCKS1
6854.46	0.165706	0.0509605	3.25166	0.00114731	0.0338768	ENSG00000197540	GZMM
728.218	0.267219	0.0822933	3.24716	0.00116565	0.0342823	ENSG00000007312	CD79B
805.905	-0.159746	0.0491997	-3.24689	0.00116673	0.0342823	ENSG00000136682	CBWD2
1173.76	-0.121326	0.037395	-3.24446	0.00117674	0.0345095	ENSG00000162419	GMEB1
3053.36	-0.112692	0.0347402	-3.24386	0.00117921	0.0345148	ENSG00000078140	UBE2K
2575.86	-0.131436	0.0405369	-3.24237	0.00118539	0.0346285	ENSG00000100644	HIF1A
136.928	-0.443552	0.137026	-3.237	0.00120795	0.0348387	ENSG00000091651	ORC6
848.723	0.126039	0.0389013	3.23997	0.00119543	0.0348387	ENSG00000100439	ABHD4
2571.95	-0.0881097	0.0272211	-3.23681	0.00120873	0.0348387	ENSG00000115365	LANCL1
457.574	-0.364033	0.112382	-3.23923	0.00119851	0.0348387	ENSG00000119969	HELLS
986.296	-0.1588	0.0490462	-3.23775	0.00120475	0.0348387	ENSG00000132432	SEC61G
2856.48	-0.114866	0.0354854	-3.23699	0.00120799	0.0348387	ENSG00000164209	SLC25A46
716.523	-0.0973828	0.0300735	-3.23816	0.00120303	0.0348387	ENSG00000184209	SNRNP35
319.335	-0.152365	0.0470997	-3.23494	0.00121668	0.0349061	ENSG00000113734	BNIP1
538.306	-0.155735	0.048146	-3.23463	0.00121799	0.0349061	ENSG00000125247	TMTC4
1700	-0.151814	0.0469339	-3.23463	0.001218	0.0349061	ENSG00000170340	B3GNT2
324.322	-0.453065	0.140095	-3.23398	0.00122078	0.0349193	ENSG00000276953	TRBV12-4
400.731	-0.18929	0.0585812	-3.23124	0.00123252	0.0350712	ENSG00000050438	SLC4A8
1130.53	0.159948	0.0495178	3.23012	0.00123739	0.0350712	ENSG00000108622	ICAM2
11030.2	0.135238	0.0418602	3.2307	0.00123487	0.0350712	ENSG00000109475	RPL34
479.174	-0.120611	0.0373404	-3.23005	0.0012377	0.0350712	ENSG00000152556	PFKM
489.975	-0.178375	0.0552203	-3.23023	0.0012369	0.0350712	ENSG00000172954	LCLAT1
238.982	0.135194	0.0418693	3.22894	0.00124249	0.0351411	ENSG00000104524	PYCR3
87.7162	-0.270662	0.0838776	-3.22687	0.00125151	0.0352642	ENSG00000132967	HMGB1P5
233.464	0.473256	0.146657	3.22695	0.00125117	0.0352642	ENSG00000230979	NA
1758.62	-0.127954	0.0396735	-3.22518	0.00125895	0.0352764	ENSG00000020922	MRE11
4139.65	-0.105047	0.0325666	-3.22561	0.00125703	0.0352764	ENSG00000100697	DICER1
169.139	0.172198	0.053378	3.22601	0.00125528	0.0352764	ENSG00000128567	PODXL
147.631	-0.501358	0.155653	-3.22099	0.00127748	0.0354666	ENSG00000111247	RAD51AP1
2424.83	-0.121204	0.0376279	-3.22113	0.00127686	0.0354666	ENSG00000114120	SLC25A36
332.806	0.15449	0.0479495	3.22193	0.00127332	0.0354666	ENSG00000132003	ZSWIM4
243.743	-0.417976	0.129739	-3.22168	0.00127442	0.0354666	ENSG00000169715	MT1E
237.099	-0.29997	0.0930862	-3.2225	0.00127079	0.0354666	ENSG00000183474	GTF2H2C
933.161	-0.131401	0.0408462	-3.21698	0.00129546	0.0356977	ENSG00000081870	HSPB11
1943.19	-0.0937334	0.0291533	-3.21519	0.00130359	0.0356977	ENSG00000111237	VPS29
1085.61	-0.125421	0.0389989	-3.216	0.00129989	0.0356977	ENSG00000118418	HMGN3
[truncated: 14,556 more rows]

## Sheet: SupTable_S7
GOBP	name	nAnno	nOverlap	fc	zscore	pvalue	adjp	or	CIl	CIu	directionBcell_IL7
[truncated: 464 more rows]

[truncated: 3 more sheets: SupTable_S8, SupTable_S9, SupTable_S10]
